# Supplementary material for: Comparative Genomics of Pandoraea, a Genus Enriched in Xenobiotic Biodegradation and Metabolism
Source: Front Microbiol. 2019 Nov 6;10:2556. doi: 10.3389/fmicb.2019.02556 (PMC6851202; doi:10.3389/fmicb.2019.02556)
Supplement: Supplementary file 2 [file Table_3.xlsx]

## Sheet: GBDP_matrix_scale
dDDH (fomula 2)	Ca.Pandoraea_novymonadis_E262	Pandoraea_anapnoica_LMG31117T	Pandoraea_anhela_LMG31108T	Pandoraea_apista_AU2161	Pandoraea_apista_DSM16535T	Pandoraea_apista_FDAARGOS126	Pandoraea_apista_LMG18089	Pandoraea_apista_Pa13324	Pandoraea_apista_Pa14367	Pandoraea_apista_Pa14697	Pandoraea_apista_Pa15518	Pandoraea_apista_Pa15674	Pandoraea_apista_Pa16226	Pandoraea_apista_Pa16800	Pandoraea_apista_Pa17292	Pandoraea_apista_Pa18364	Pandoraea_apista_Pa18384	Pandoraea_apista_Pa18495	Pandoraea_apista_Pa18531	Pandoraea_apista_PA200	Pandoraea_apista_PA201	Pandoraea_apista_TF80G25	Pandoraea_apista_TF81F4	Pandoraea_aquatica_LMG31011T	Pandoraea_bronchicola_LMG20603T	Pandoraea_capi_ISTKB	Pandoraea_capi_LMG20602T	Pandoraea_captiosa_LMG31118T	Pandoraea_cepalis_B-6	Pandoraea_cepalis_LMG31106T	Pandoraea_cepalis_LMG31107	Pandoraea_commovens_LMG31010T	Pandoraea_communis_LMG31110T	Pandoraea_communis_LMG31111	Pandoraea_communis_SD6-2	Pandoraea_eparura_LMG31012T	Pandoraea_faecigallinarum_DSM23572T	Pandoraea_fibrosis_6399T	Pandoraea_fibrosis_7641	Pandoraea_fibrosis_LMG31113	Pandoraea_horticolens_LMG31112T	Pandoraea_iniqua_LMG31009T	Pandoraea_iniqua_LMG31115	Pandoraea_morbifera_LMG31116T	Pandoraea_norimbergensis_DSM11628T	Pandoraea_nosoerga_LMG31109T	Pandoraea_oxalativorans_DSM23570T	Pandoraea_pneumonica_LMG31114T	Pandoraea_pnomenusa_3kgm
Ca.Pandoraea_novymonadis_E262	100	20	20.6	20.8	20.9	20.8	19.4	19.3	19.3	19.4	19.3	19.3	20.4	19.3	19.3	19.3	19.3	19.4	19.3	19.3	19.3	20.4	20.4	20.9	18.8	21.1	20.6	21.1	18.8	18.6	18.6	20.8	18.9	18.9	18.1	18.7	22.8	19.7	19.7	19.6	18.8	21	21	18.5	22.8	19	22	20.8	20.2
Pandoraea_anapnoica_LMG31117T	20	100	29.3	26.5	26.6	26.5	26.5	26.7	26.6	26.6	26.7	26.7	26.5	26.7	26.7	26.8	26.7	26.8	26.7	26.6	26.6	26.5	26.5	48.5	27.1	29.3	29.3	28.6	27.3	27.1	27	54.7	26.9	26.9	26.8	27.5	28.8	27	27	27	26.8	27	25.5	26.5	25.2	26.9	50.8	25.5	26.7
Pandoraea_anhela_LMG31108T	20.6	29.3	100	27.2	27.3	27.3	27.2	27.6	27.5	27.6	27.6	27.6	27.2	27.6	27.6	27.7	27.6	27.7	27.6	27.2	27.2	27.2	27.2	29.4	27.8	33.7	33.4	29.2	27.8	27.5	27.6	29.2	27.6	27.5	27.5	28	29.9	27.5	27.5	27.7	27.5	26.2	26.2	27.1	26.1	27.6	29.1	26.2	27.5
Pandoraea_apista_AU2161	20.8	26.5	27.2	100	94.3	95.8	94.4	95.2	95.2	95.2	95.2	95.9	93.9	95.2	95.2	95.2	95.1	95.2	95.2	95.7	95.7	99.8	99.9	27	34.1	27.1	27.1	26.8	29.1	28.7	28.8	26.7	34.5	34.6	34.5	29.4	27	36.8	36.8	36.8	34.6	25.8	25.8	26.9	26	27	26.9	25.9	27.1
Pandoraea_apista_DSM16535T	20.9	26.6	27.3	94.3	100	94	92.9	93	93	93	93.2	93.6	92.9	93	93.3	92.9	92.8	92.9	93.1	98.4	98.4	94	94	27	34.2	27.2	27.1	26.8	29.3	28.8	28.8	26.7	35.1	34.5	34.6	29.4	27.1	37.2	37.2	36.9	34.6	25.9	25.9	27	25.8	27.2	26.9	25.7	27.2
Pandoraea_apista_FDAARGOS126	20.8	26.5	27.3	95.8	94	100	95.2	95.6	95.9	95.6	95.9	95.9	95.3	95.8	95.9	95.9	95.7	95.8	95.8	95.5	95.5	95.8	95.8	26.9	34.2	27.1	27.1	26.8	29.2	28.8	28.7	26.7	34.5	34.4	34.5	29.3	27	36.9	36.9	36.9	34.6	25.9	25.8	26.9	25.7	27	26.9	25.6	27.1
Pandoraea_apista_LMG18089	19.4	26.5	27.2	94.4	92.9	95.2	100	93.6	93.1	93.6	94.2	94.4	99.4	93.6	94.2	93.3	92.9	93.3	94	95.6	95.6	94.3	94.3	26.9	34.1	27.1	27	27	29.6	29	28.7	26.7	34.5	34.5	34.5	29.9	26.9	36.8	36.8	36.8	34.5	25.9	25.7	26.9	25.7	26.9	26.8	25.6	27
Pandoraea_apista_Pa13324	19.3	26.7	27.6	95.2	93	95.6	93.6	100	99.3	98.9	100	99.2	93.7	99.7	99.9	99.5	99.2	99.5	99.9	94.7	94.7	95.2	95.2	27	34.1	27.2	27.1	26.8	29.4	29.2	28.8	26.7	34.5	34.4	34.6	30	26.9	36.9	36.9	37	34.4	25.9	25.9	27	25.7	27	26.9	25.6	27.1
Pandoraea_apista_Pa14367	19.3	26.6	27.5	95.2	93	95.9	93.1	99.3	100	99.3	99.9	99.5	93.2	99.2	99.9	99.7	99.9	99.7	99.9	94.4	94.5	95.3	95.2	27	34.1	27.2	27.1	26.7	29.8	28.9	28.8	26.7	34.4	34.3	34.5	29.6	26.9	36.9	36.9	37	34.3	25.8	25.8	26.9	25.7	27	26.8	25.6	27.1
Pandoraea_apista_Pa14697	19.4	26.6	27.6	95.2	93	95.6	93.6	98.9	99.3	100	100	99.2	93.6	99.7	100	99.5	99.2	99.5	99.9	94.7	94.7	95.2	95.2	27	34.1	27.1	27.1	26.8	29.4	29.1	28.8	26.7	34.5	34.3	34.5	29.9	26.9	36.9	36.9	37	34.4	25.8	25.8	27	25.7	27	26.9	25.6	27.1
Pandoraea_apista_Pa15518	19.3	26.7	27.6	95.2	93.2	95.9	94.2	100	99.9	100	100	99.9	94.4	98.1	99.7	99.9	99.8	99.9	98.3	95.5	95.5	95.2	95.2	27	34.1	27.2	27.1	26.8	29.5	29.3	28.8	26.7	34.4	34.4	34.5	30.2	26.9	36.9	36.9	37	34.5	25.9	25.9	26.9	25.7	27	26.8	25.6	27.1
Pandoraea_apista_Pa15674	19.3	26.7	27.6	95.9	93.6	95.9	94.4	99.2	99.5	99.2	99.9	100	95.3	99.7	99.9	99.3	99.4	99.3	99.9	94.6	94.6	96	96	27	34.1	27.2	27.2	26.8	29	28.9	28.8	26.7	34.5	34.4	34.6	29.3	27	37	36.9	37	34.4	25.9	25.8	26.9	25.7	27.1	26.9	25.6	27.2
Pandoraea_apista_Pa16226	20.4	26.5	27.2	93.9	92.9	95.3	99.4	93.7	93.2	93.6	94.4	95.3	100	93.8	94.3	93.7	93.2	93.7	94.3	95.5	95.4	93.7	93.7	27	34.1	27.2	27.1	27.1	29.6	29.1	28.8	26.8	34.5	34.6	34.5	30	27	36.8	36.8	36.8	34.5	25.9	25.8	26.9	26	27	26.9	25.6	27.2
Pandoraea_apista_Pa16800	19.3	26.7	27.6	95.2	93	95.8	93.6	99.7	99.2	99.7	98.1	99.7	93.8	100	97.5	99.3	99.5	98.3	92.2	95	95	95.2	95.2	26.9	34.1	27.2	27.1	26.7	29.4	29.1	28.8	26.7	34.4	34.4	34.5	29.9	26.9	36.9	36.9	36.9	34.4	25.8	25.8	26.9	25.7	27	26.8	25.6	27.1
Pandoraea_apista_Pa17292	19.3	26.7	27.6	95.2	93.3	95.9	94.2	99.9	99.9	100	99.7	99.9	94.3	97.5	100	99.9	99.8	99.9	99	95.4	95.4	95.2	95.2	27	34.1	27.2	27.1	26.8	29.4	29.2	28.8	26.7	34.5	34.4	34.5	29.9	26.9	36.9	36.9	37	34.5	25.9	25.9	26.9	25.7	27	26.9	25.6	27.1
Pandoraea_apista_Pa18364	19.3	26.8	27.7	95.2	92.9	95.9	93.3	99.5	99.7	99.5	99.9	99.3	93.7	99.3	99.9	100	99.7	99.6	99.9	94.8	94.8	95.2	95.2	27.1	34.1	27.3	27.2	26.9	29.6	29.1	28.9	26.8	34.5	34.5	34.6	29.8	27	37.1	37.1	37.1	34.5	25.9	25.9	27	25.8	27	27	25.7	27.2
Pandoraea_apista_Pa18384	19.3	26.7	27.6	95.1	92.8	95.7	92.9	99.2	99.9	99.2	99.8	99.4	93.2	99.5	99.8	99.7	100	99.2	99.7	94.3	94.3	95.1	95.1	27	34.1	27.2	27.1	26.8	29.8	29.1	28.8	26.7	34.5	34.3	34.6	29.9	26.9	36.9	36.9	37	34.3	25.9	25.8	26.9	25.7	27	26.9	25.6	27.1
Pandoraea_apista_Pa18495	19.4	26.8	27.7	95.2	92.9	95.8	93.3	99.5	99.7	99.5	99.9	99.3	93.7	98.3	99.9	99.6	99.2	100	99.9	94.8	94.8	95.2	95.2	27.1	34.1	27.3	27.2	26.9	29.7	29.1	28.9	26.8	34.5	34.5	34.6	29.8	27	37.1	37.1	37.1	34.5	26	25.9	27	25.8	27	27	25.7	27.2
Pandoraea_apista_Pa18531	19.3	26.7	27.6	95.2	93.1	95.8	94	99.9	99.9	99.9	98.3	99.9	94.3	92.2	99	99.9	99.7	99.9	100	95.4	95.4	95.2	95.2	27	34.1	27.2	27.1	26.8	29.5	29.2	28.8	26.7	34.5	34.4	34.6	30	26.9	37	37	37	34.5	25.9	25.9	27	25.7	27	26.9	25.6	27.1
Pandoraea_apista_PA200	19.3	26.6	27.2	95.7	98.4	95.5	95.6	94.7	94.4	94.7	95.5	94.6	95.5	95	95.4	94.8	94.3	94.8	95.4	100	100	95.7	95.7	26.9	34.1	27.1	27	26.9	29	28.7	28.7	26.6	34.3	34.3	34.5	29.3	26.9	37.2	37.1	36.7	34.6	25.8	25.8	26.9	25.7	27	26.9	25.6	27
Pandoraea_apista_PA201	19.3	26.6	27.2	95.7	98.4	95.5	95.6	94.7	94.5	94.7	95.5	94.6	95.4	95	95.4	94.8	94.3	94.8	95.4	100	100	95.7	95.7	26.9	34.1	27.2	27	26.9	29	28.7	28.7	26.6	34.4	34.3	34.5	29.3	26.9	37.2	37.1	36.7	34.6	25.8	25.8	26.9	25.7	27	26.9	25.6	27
Pandoraea_apista_TF80G25	20.4	26.5	27.2	99.8	94	95.8	94.3	95.2	95.3	95.2	95.2	96	93.7	95.2	95.2	95.2	95.1	95.2	95.2	95.7	95.7	100	98.5	27	34.1	27.2	27.2	26.8	29.1	28.7	28.7	26.8	34.5	34.6	34.6	29.3	27.1	36.8	36.8	36.7	34.6	25.9	25.8	26.9	26	27	26.9	25.9	27.1
Pandoraea_apista_TF81F4	20.4	26.5	27.2	99.9	94	95.8	94.3	95.2	95.2	95.2	95.2	96	93.7	95.2	95.2	95.2	95.1	95.2	95.2	95.7	95.7	98.5	100	27	34.1	27.2	27.2	26.8	29.1	28.7	28.7	26.8	34.5	34.6	34.6	29.3	27.1	36.8	36.8	36.7	34.6	25.9	25.8	26.9	26	27	26.9	25.9	27.1
Pandoraea_aquatica_LMG31011T	20.9	48.5	29.4	27	27	26.9	26.9	27	27	27	27	27	27	26.9	27	27.1	27	27.1	27	26.9	26.9	27	27	100	27.3	29.6	29.6	28.8	27.6	27.4	27.2	48.9	27.1	27.3	27.2	27.8	29.2	27	27	26.9	27.2	25.9	25.8	26.8	25.8	27.1	46.2	25.8	27.1
Pandoraea_bronchicola_LMG20603T	18.8	27.1	27.8	34.1	34.2	34.2	34.1	34.1	34.1	34.1	34.1	34.1	34.1	34.1	34.1	34.1	34.1	34.1	34.1	34.1	34.1	34.1	34.1	27.3	100	27.7	27.7	27.2	30.8	30.3	30.2	27.3	37.4	37.2	37.7	30.9	27.3	34.7	34.7	34.6	37.6	26.2	26.1	27.3	26.1	27.7	27.4	25.8	27.6
Pandoraea_capi_ISTKB	21.1	29.3	33.7	27.1	27.2	27.1	27.1	27.2	27.2	27.1	27.2	27.2	27.2	27.2	27.2	27.3	27.2	27.3	27.2	27.1	27.2	27.2	27.2	29.6	27.7	100	69.6	29.5	27.9	27.6	27.6	29.5	27.5	27.6	27.5	28.1	30.1	27.6	27.6	27.5	27.4	26	26	27.2	25.9	27.7	29.6	26.1	27.4
Pandoraea_capi_LMG20602T	20.6	29.3	33.4	27.1	27.1	27.1	27	27.1	27.1	27.1	27.1	27.2	27.1	27.1	27.1	27.2	27.1	27.2	27.1	27	27	27.2	27.2	29.6	27.7	69.6	100	29.4	27.9	27.6	27.4	29.3	27.6	27.6	27.5	28	30.1	27.6	27.5	27.5	27.6	26.1	26	27	25.9	27.6	29.6	26	27.2
Pandoraea_captiosa_LMG31118T	21.1	28.6	29.2	26.8	26.8	26.8	27	26.8	26.7	26.8	26.8	26.8	27.1	26.7	26.8	26.9	26.8	26.9	26.8	26.9	26.9	26.8	26.8	28.8	27.2	29.5	29.4	100	27.3	27.1	27.1	28.5	27	27	26.9	27.5	30.4	27	27	26.9	26.9	26	25.9	26.9	25.8	27.3	28.4	25.7	27.2
Pandoraea_cepalis_B-6	18.8	27.3	27.8	29.1	29.3	29.2	29.6	29.4	29.8	29.4	29.5	29	29.6	29.4	29.4	29.6	29.8	29.7	29.5	29	29	29.1	29.1	27.6	30.8	27.9	27.9	27.3	100	86	69.2	27.2	30.1	29.9	30.2	41.7	27.3	29.5	29.5	29.5	30.1	26.5	26.5	27.5	26.5	28	27.5	26	27.6
Pandoraea_cepalis_LMG31106T	18.6	27.1	27.5	28.7	28.8	28.8	29	29.2	28.9	29.1	29.3	28.9	29.1	29.1	29.2	29.1	29.1	29.1	29.2	28.7	28.7	28.7	28.7	27.4	30.3	27.6	27.6	27.1	86	100	68.4	27.1	29.9	29.6	29.9	41.7	27.1	29.1	29.1	29.1	29.8	26.2	26.2	27.3	26.2	27.6	27.2	25.8	27.4
Pandoraea_cepalis_LMG31107	18.6	27	27.6	28.8	28.8	28.7	28.7	28.8	28.8	28.8	28.8	28.8	28.8	28.8	28.8	28.9	28.8	28.9	28.8	28.7	28.7	28.7	28.7	27.2	30.2	27.6	27.4	27.1	69.2	68.4	100	27	29.7	29.3	29.6	40.8	27.1	28.9	28.9	29	29.5	26.2	26.2	27.3	26.1	27.5	27.2	25.8	27.5
Pandoraea_commovens_LMG31010T	20.8	54.7	29.2	26.7	26.7	26.7	26.7	26.7	26.7	26.7	26.7	26.7	26.8	26.7	26.7	26.8	26.7	26.8	26.7	26.6	26.6	26.8	26.8	48.9	27.3	29.5	29.3	28.5	27.2	27.1	27	100	26.9	26.9	26.9	27.4	28.9	27	27	27	27	26	25.8	26.5	25.7	27	50.5	25.5	26.7
Pandoraea_communis_LMG31110T	18.9	26.9	27.6	34.5	35.1	34.5	34.5	34.5	34.4	34.5	34.4	34.5	34.5	34.4	34.5	34.5	34.5	34.5	34.5	34.3	34.4	34.5	34.5	27.1	37.4	27.5	27.6	27	30.1	29.9	29.7	26.9	100	80.1	95.3	30	27.1	35	35	35	62.2	26.1	26	27.1	26.1	27.5	27.2	25.9	27.4
Pandoraea_communis_LMG31111	18.9	26.9	27.5	34.6	34.5	34.4	34.5	34.4	34.3	34.3	34.4	34.4	34.6	34.4	34.4	34.5	34.3	34.5	34.4	34.3	34.3	34.6	34.6	27.3	37.2	27.6	27.6	27	29.9	29.6	29.3	26.9	80.1	100	79.9	30	27.1	34.9	34.9	34.8	60	26.2	26.2	27.2	26.5	27.4	27	25.9	27.3
Pandoraea_communis_SD6-2	18.1	26.8	27.5	34.5	34.6	34.5	34.5	34.6	34.5	34.5	34.5	34.6	34.5	34.5	34.5	34.6	34.6	34.6	34.6	34.5	34.5	34.6	34.6	27.2	37.7	27.5	27.5	26.9	30.2	29.9	29.6	26.9	95.3	79.9	100	30.1	27	35	35	35	62.2	26.1	26	27.1	25.9	27.3	27.1	25.9	27.4
Pandoraea_eparura_LMG31012T	18.7	27.5	28	29.4	29.4	29.3	29.9	30	29.6	29.9	30.2	29.3	30	29.9	29.9	29.8	29.9	29.8	30	29.3	29.3	29.3	29.3	27.8	30.9	28.1	28	27.5	41.7	41.7	40.8	27.4	30	30	30.1	100	27.6	29.6	29.6	29.6	30.3	26.8	26.9	27.8	26.5	28	27.9	26.4	28.1
Pandoraea_faecigallinarum_DSM23572T	22.8	28.8	29.9	27	27.1	27	26.9	26.9	26.9	26.9	26.9	27	27	26.9	26.9	27	26.9	27	26.9	26.9	26.9	27.1	27.1	29.2	27.3	30.1	30.1	30.4	27.3	27.1	27.1	28.9	27.1	27.1	27	27.6	100	27.1	27.1	27.3	27.2	25.9	25.9	26.9	25.9	27.3	29.3	25.6	27
Pandoraea_fibrosis_6399T	19.7	27	27.5	36.8	37.2	36.9	36.8	36.9	36.9	36.9	36.9	37	36.8	36.9	36.9	37.1	36.9	37.1	37	37.2	37.2	36.8	36.8	27	34.7	27.6	27.6	27	29.5	29.1	28.9	27	35	34.9	35	29.6	27.1	100	100	90.5	35.1	26	26	27.1	26.1	27.3	27.1	25.9	27.3
Pandoraea_fibrosis_7641	19.7	27	27.5	36.8	37.2	36.9	36.8	36.9	36.9	36.9	36.9	36.9	36.8	36.9	36.9	37.1	36.9	37.1	37	37.1	37.1	36.8	36.8	27	34.7	27.6	27.5	27	29.5	29.1	28.9	27	35	34.9	35	29.6	27.1	100	100	90.5	35.1	26	26	27.1	26	27.3	27.1	25.8	27.3
Pandoraea_fibrosis_LMG31113	19.6	27	27.7	36.8	36.9	36.9	36.8	37	37	37	37	37	36.8	36.9	37	37.1	37	37.1	37	36.7	36.7	36.7	36.7	26.9	34.6	27.5	27.5	26.9	29.5	29.1	29	27	35	34.8	35	29.6	27.3	90.5	90.5	100	35.1	26.1	26	27.1	26.1	27.2	27.1	25.9	27.2
Pandoraea_horticolens_LMG31112T	18.8	26.8	27.5	34.6	34.6	34.6	34.5	34.4	34.3	34.4	34.5	34.4	34.5	34.4	34.5	34.5	34.3	34.5	34.5	34.6	34.6	34.6	34.6	27.2	37.6	27.4	27.6	26.9	30.1	29.8	29.5	27	62.2	60	62.2	30.3	27.2	35.1	35.1	35.1	100	26.1	26	27.2	26	27.3	27.1	25.8	27.4
Pandoraea_iniqua_LMG31009T	21	27	26.2	25.8	25.9	25.9	25.9	25.9	25.8	25.8	25.9	25.9	25.9	25.8	25.9	25.9	25.9	26	25.9	25.8	25.8	25.9	25.9	25.9	26.2	26	26.1	26	26.5	26.2	26.2	26	26.1	26.2	26.1	26.8	25.9	26	26	26.1	26.1	100	80.5	25.9	51.7	26.8	26	31.7	26.2
Pandoraea_iniqua_LMG31115	21	25.5	26.2	25.8	25.9	25.8	25.7	25.9	25.8	25.8	25.9	25.8	25.8	25.8	25.9	25.9	25.8	25.9	25.9	25.8	25.8	25.8	25.8	25.8	26.1	26	26	25.9	26.5	26.2	26.2	25.8	26	26.2	26	26.9	25.9	26	26	26	26	80.5	100	25.9	51.8	26.7	26	31.7	26.2
Pandoraea_morbifera_LMG31116T	18.5	26.5	27.1	26.9	27	26.9	26.9	27	26.9	27	26.9	26.9	26.9	26.9	26.9	27	26.9	27	27	26.9	26.9	26.9	26.9	26.8	27.3	27.2	27	26.9	27.5	27.3	27.3	26.5	27.1	27.2	27.1	27.8	26.9	27.1	27.1	27.1	27.2	25.9	25.9	100	25.9	28	26.8	25.6	58.3
Pandoraea_norimbergensis_DSM11628T	22.8	25.2	26.1	26	25.8	25.7	25.7	25.7	25.7	25.7	25.7	25.7	26	25.7	25.7	25.8	25.7	25.8	25.7	25.7	25.7	26	26	25.8	26.1	25.9	25.9	25.8	26.5	26.2	26.1	25.7	26.1	26.5	25.9	26.5	25.9	26.1	26	26.1	26	51.7	51.8	25.9	100	26.5	25.9	31.6	26.2
Pandoraea_nosoerga_LMG31109T	19	26.9	27.6	27	27.2	27	26.9	27	27	27	27	27.1	27	27	27	27	27	27	27	27	27	27	27	27.1	27.7	27.7	27.6	27.3	28	27.6	27.5	27	27.5	27.4	27.3	28	27.3	27.3	27.3	27.2	27.3	26.8	26.7	28	26.5	100	27.1	26.5	28.1
Pandoraea_oxalativorans_DSM23570T	22	50.8	29.1	26.9	26.9	26.9	26.8	26.9	26.8	26.9	26.8	26.9	26.9	26.8	26.9	27	26.9	27	26.9	26.9	26.9	26.9	26.9	46.2	27.4	29.6	29.6	28.4	27.5	27.2	27.2	50.5	27.2	27	27.1	27.9	29.3	27.1	27.1	27.1	27.1	26	26	26.8	25.9	27.1	100	25.7	27.1
Pandoraea_pneumonica_LMG31114T	20.8	25.5	26.2	25.9	25.7	25.6	25.6	25.6	25.6	25.6	25.6	25.6	25.6	25.6	25.6	25.7	25.6	25.7	25.6	25.6	25.6	25.9	25.9	25.8	25.8	26.1	26	25.7	26	25.8	25.8	25.5	25.9	25.9	25.9	26.4	25.6	25.9	25.8	25.9	25.8	31.7	31.7	25.6	31.6	26.5	25.7	100	25.9
Pandoraea_pnomenusa_3kgm	20.2	26.7	27.5	27.1	27.2	27.1	27	27.1	27.1	27.1	27.1	27.2	27.2	27.1	27.1	27.2	27.1	27.2	27.1	27	27	27.1	27.1	27.1	27.6	27.4	27.2	27.2	27.6	27.4	27.5	26.7	27.4	27.3	27.4	28.1	27	27.3	27.3	27.2	27.4	26.2	26.2	58.3	26.2	28.1	27.1	25.9	100
Pandoraea_pnomenusa_DSM16536T	20.2	26.7	27.5	27.1	27.2	27	26.9	27.1	27.1	27	27.1	27.1	27	27.1	27.1	27.2	27.1	27.2	27.1	26.9	26.9	27.1	27.1	27.1	27.7	27.4	27.2	27.1	27.6	27.4	27.5	26.8	27.4	27.3	27.3	28.1	27.1	27.3	27.3	27.1	27.4	26.3	26.2	58.7	26.2	28	27.1	25.9	94.4
Pandoraea_pnomenusa_E26	18.8	26.7	27.5	27	27.1	27.1	27	27.1	27	27	27.1	27.2	27.1	27.1	27.1	27.1	27	27.1	27.1	27	27	27	27	27.1	27.6	27.4	27.2	27.1	27.9	27.3	27.5	26.8	27.3	27.3	27.4	28.1	27	27.3	27.3	27.2	27.3	26.2	26.1	58.6	26.1	28	27.1	25.8	95.6
Pandoraea_pnomenusa_LMG31119	18.8	26.7	27.5	27	27.1	27	26.9	27.1	27	27	27	27.1	27	27	27	27.1	27	27.1	27.1	27	27	27	27	27.1	27.7	27.4	27.2	27.1	27.6	27.3	27.4	26.7	27.5	27.3	27.4	28.1	27	27.2	27.3	27.1	27.3	26.2	26.2	58.7	26.1	27.9	27.1	25.8	94.4
Pandoraea_pnomenusa_MCB032	20	26.8	27.5	27.1	27.2	27.1	27.1	27.2	27	27.1	27.1	27.1	27.2	27.1	27.1	27.1	27	27.1	27.1	27	27	27.1	27.1	27.2	27.6	27.4	27.2	27.3	27.6	27.4	27.6	26.8	27.5	27.4	27.4	28.2	26.9	27.2	27.3	27.2	27.2	26.3	26.1	58.8	26.2	27.9	27.1	25.9	94.8
Pandoraea_pnomenusa_RB38	20.2	26.7	27.5	27.1	27.2	27.1	27	27.1	27.1	27.1	27.1	27.1	27.1	27.1	27.1	27.2	27.1	27.2	27.1	27	27	27.1	27.1	27.1	27.7	27.4	27.3	27.1	27.6	27.4	27.5	26.8	27.4	27.3	27.4	28.2	27.1	27.3	27.3	27.2	27.3	26.3	26.2	58.7	26.2	28	27.1	25.9	95.7
Pandoraea_pnomenusa_RB-44	20.2	26.8	27.5	27.1	27.2	27.1	27	27.1	27	27.1	27.1	27.2	27.2	27.1	27.1	27.1	27	27.1	27.1	27	27	27.1	27.1	27.1	27.7	27.4	27.2	27.1	27.6	27.3	27.5	26.8	27.4	27.3	27.4	28.1	27	27.3	27.3	27.2	27.3	26.3	26.2	58.7	26.2	28	27.1	25.9	95.6
Pandoraea_pulmonicola_DSM16583T	20.1	26.7	27.3	27	27	26.9	26.8	26.9	26.9	26.9	26.9	26.9	26.9	26.9	26.9	27	26.9	27	26.9	26.9	26.9	27	27	26.9	27.7	27.4	27.3	26.8	28	27.6	27.7	26.8	27.2	27.2	27.1	28.3	27.2	27.2	27.2	27.3	27.3	26.5	26.4	27.5	26.3	35	27	26.3	27.4
Pandoraea_soli_LMG31014T	18.7	27.1	27.5	28.8	28.9	28.9	28.8	28.9	28.8	28.9	28.9	28.9	28.9	28.9	28.9	29	28.9	29	28.9	28.7	28.7	28.8	28.8	27.2	30.5	27.8	27.7	27.3	64.2	65	60.7	27	30	29.8	29.9	41	27.1	29.2	29.2	29.1	29.9	26.3	26.2	27.4	26.2	27.6	27.3	25.9	27.4
Pandoraea_sp._PE-S2R-1	21	25.5	26.1	25.8	25.8	25.8	25.7	25.8	25.8	25.7	25.8	25.8	25.8	25.8	25.8	25.8	25.8	25.8	25.8	25.8	25.8	25.8	25.8	25.7	26.2	26	26	25.9	26.4	26.2	26.1	25.7	26.1	26.2	26.1	26.8	25.8	26.1	26	26	26	55	54.8	25.9	57.4	26.7	25.8	31.7	26.1
Pandoraea_sp._PE-S2T-3	20.9	25.5	25.9	25.7	25.7	25.7	25.7	25.7	25.7	25.6	25.7	25.7	25.7	25.7	25.7	25.7	25.7	25.8	25.7	25.7	25.7	25.7	25.7	25.8	26	25.9	26	25.9	26.4	26.1	26	25.8	26.1	26.1	26.1	26.8	25.8	26	26	25.9	26	54.7	54.8	25.8	57.4	26.6	25.8	31.7	26
Pandoraea_sputorum_DSM21091T	21.6	52	29	26.6	26.6	26.6	26.5	26.6	26.6	26.6	26.6	26.6	26.6	26.6	26.6	26.7	26.6	26.7	26.6	26.5	26.5	26.7	26.7	46.5	27	29.3	29.3	28.4	27.1	27	27	54.2	26.8	27	26.9	27.5	28.9	26.8	26.8	26.7	26.8	25.7	25.7	26.5	25.6	26.8	49.4	25.4	26.5
Pandoraea_sputorum_LMG20601	20.1	52.1	28.9	26.5	26.5	26.5	26.5	26.6	26.5	26.5	26.5	26.5	26.5	26.5	26.5	26.7	26.5	26.7	26.6	26.4	26.4	26.6	26.6	46.5	27	29.2	29.3	28.2	27.1	27	26.9	54.1	26.8	27	26.9	27.4	29.5	26.8	26.8	26.7	26.8	25.6	25.6	26.5	25.5	26.6	48.8	25.4	26.5
Pandoraea_sputorum_LMG31120	20	52	29	26.6	26.5	26.6	26.5	26.5	26.5	26.5	26.5	26.5	26.6	26.5	26.6	26.6	26.5	26.6	26.6	26.4	26.4	26.6	26.6	46.4	26.9	29.2	29.3	28.4	27.1	26.8	26.9	54.3	26.8	26.9	26.9	27.5	28.8	26.8	26.8	26.8	26.8	25.6	25.4	26.4	25.4	26.8	49.5	25.4	26.5
Pandoraea_sputorum_LMG31121	20	51.7	28.9	26.6	26.6	26.5	26.5	26.5	26.5	26.5	26.5	26.6	26.6	26.5	26.6	26.6	26.5	26.6	26.6	26.6	26.6	26.6	26.6	46.3	27.1	29.3	29.2	28.2	27.1	26.9	26.8	53.9	26.7	26.9	26.7	27.4	28.8	26.7	26.7	26.6	26.8	25.5	25.6	26.5	25.4	26.7	48.2	25.3	26.6
Pandoraea_terrae_LMG30175T	19	22.9	23.1	22.8	22.8	22.8	22.8	22.6	22.6	22.6	22.6	22.6	22.8	22.6	22.6	22.6	22.6	22.7	22.6	22.7	22.7	22.7	22.7	23	22.9	23.4	23.1	23.1	22.8	22.7	22.8	22.7	22.3	22.5	22.4	23.1	22.9	22.6	22.6	22.7	22.4	23	23.1	23.1	23.1	23.5	22.9	22.7	23.3
Pandoraea_terrigena_LMG31013T	18.6	26.8	27.2	28.9	29	28.8	28.9	28.9	28.9	28.9	28.9	28.9	28.9	28.9	28.9	29	28.9	29	29	28.8	28.8	28.9	28.9	27.1	30.5	27.5	27.5	26.8	40	40	41	26.9	30.1	30	30.3	43.1	26.9	29.2	29.1	29.1	30	26.2	26.2	27.1	26.2	27.6	27.2	25.8	27.3
Pandoraea_thiooxydans_ATSB16	20	19.9	20.8	20.3	20.4	20.4	20.2	20.2	20.2	20.2	20.2	20.2	20.4	20.2	20.2	20.2	20.2	20.2	20.2	20.1	20.2	20.2	20.2	20.1	20.5	20.7	20.7	20.4	20.3	20.3	20.3	20.1	20.3	20.2	20.3	20.7	21	20.6	20.6	20.4	20.4	20.5	20.5	20.4	20.8	20.8	20.4	20.4	20.8
Pandoraea_thiooxydans_DSM25325T	19.9	19.9	20.8	20.3	20.4	20.4	20.2	20.2	20.2	20.2	20.2	20.2	20.4	20.2	20.2	20.2	20.2	20.2	20.2	20.1	20.1	20.2	20.2	20	20.5	20.6	20.7	20.4	20.3	20.3	20.2	20.1	20.3	20.2	20.3	20.6	21	20.6	20.6	20.4	20.4	20.5	20.5	20.4	20.8	20.8	20.4	20.4	20.8
Pandoraea_vervacti_NS15T	22.6	28.5	29.3	26.8	26.8	26.8	26.7	26.7	26.7	26.7	26.7	26.7	26.7	26.7	26.7	26.8	26.7	26.8	26.7	26.7	26.7	26.8	26.8	28.7	27.3	29.7	29.5	50.5	27.4	27.1	27.1	28.7	27	26.9	26.9	27.6	31.1	27.1	27.1	27	27.1	26	25.8	26.8	25.9	27.3	28.8	25.8	27
[truncated: 19 more columns]

## Sheet: GBDP_details
		Formula 1				Formula 2				Formula 3				G+C difference
Query genome	Reference genome	DDH	Model C.I.	Distance	Prob. DDH >= 70%	DDH	Model C.I.	Distance	Prob. DDH >= 70%	DDH	Model C.I.	Distance	Prob. DDH >= 70%
Pandoraea_capi_LMG20602T	Pandoraea_capi_ISTKB	81.2	[77.3 - 84.6%]	0.1261	92.21	69.6	[66.6 - 72.5%]	0.0366	77.67	82	[78.6 - 84.9%]	0.158	96.89	0.28
Pandoraea_cepalis_LMG31106T	Pandoraea_cepalis_B-6	78.3	[74.3 - 81.8%]	0.1411	89.12	86	[83.3 - 88.3%]	0.0165	94.21	82.5	[79.1 - 85.4%]	0.1552	97.17	0.16
Pandoraea_cepalis_LMG31106T	Pandoraea_cepalis_LMG31107	76.3	[72.3 - 79.9%]	0.1508	86.57	68.4	[65.4 - 71.3%]	0.0383	75.27	77.5	[74.1 - 80.7%]	0.1834	92.76	0.17
Pandoraea_cepalis_B-6	Pandoraea_cepalis_LMG31107	77.10	[73.1 - 80.7%]	0.1468	87.68	69.20	[66.2 - 72%]	0.0372	76.82	78.40	[74.9 - 81.5%]	0.1786	93.82	0.02
Pandoraea_soli_LMG31014T	Pandoraea_cepalis_B-6	81.30	[77.4 - 84.7%]	0.1258	92.26	64.20	[61.3 - 67.1%]	0.0446	65.29	80.80	[77.4 - 83.8%]	0.1648	96.09	0.06
Pandoraea_soli_LMG31014T	Pandoraea_cepalis_LMG31106T	80.20	[76.3 - 83.6%]	0.1313	91.24	65.00	[62.1 - 67.9%]	0.0434	67.41	80.10	[76.7 - 83.1%]	0.1690	95.51	0.09
Pandoraea_soli_LMG31014T	Pandoraea_cepalis_LMG31107	81.80	[77.9 - 85.1%]	0.1235	92.65	60.70	[57.8 - 63.5%]	0.0504	54.65	80.30	[76.9 - 83.3%]	0.1677	95.69	0.08
Pandoraea_horticolens_LMG31112T	Pandoraea_communis_LMG31110T	71.30	[67.3 - 74.9%]	0.1768	77.3	62.20	[59.3 - 65%]	0.0479	59.41	71.80	[68.3 - 75%]	0.2163	80.24	0.26
Pandoraea_horticolens_LMG31112T	Pandoraea_communis_LMG31111	67.60	[63.7 - 71.3%]	0.1964	67.84	60.00	[57.1 - 62.7%]	0.0517	52.18	68.00	[64.6 - 71.3%]	0.2379	65.54	0.19
Pandoraea_horticolens_LMG31112T	Pandoraea_communis_SD6-2	71.50	[67.6 - 75.2%]	0.1755	77.88	62.20	[59.3 - 65%]	0.0479	59.38	72.00	[68.5 - 75.2%]	0.2150	80.93	0.21

## Sheet: Caption
Matrix with pairwise digital DNA-DNA hybridization (dDDH) values and their confidence intervals (formula 2) as calculated by the Genome-to-Genome Distance Calculator (GGDC 2.12) under recommended settings.
