# Supplementary material for: Comparative Genomics of Pandoraea, a Genus Enriched in Xenobiotic Biodegradation and Metabolism
Source: Front Microbiol. 2019 Nov 6;10:2556. doi: 10.3389/fmicb.2019.02556 (PMC6851202; doi:10.3389/fmicb.2019.02556)
Supplement: Supplementary file 3 [file Table_4.xlsx]

## Sheet: OAU_matrix_scale
OrthoANIu	Ca.Pandoraea_novymonadis_E262	Pandoraea_anapnoica_LMG31117T	Pandoraea_anhela_LMG31108T	Pandoraea_apista_AU2161	Pandoraea_apista_DSM16535T	Pandoraea_apista_FDAARGOS126	Pandoraea_apista_LMG18089	Pandoraea_apista_Pa13324	Pandoraea_apista_Pa14367	Pandoraea_apista_Pa14697	Pandoraea_apista_Pa15518	Pandoraea_apista_Pa15674	Pandoraea_apista_Pa16226	Pandoraea_apista_Pa16800	Pandoraea_apista_Pa17292	Pandoraea_apista_Pa18364	Pandoraea_apista_Pa18384	Pandoraea_apista_Pa18495	Pandoraea_apista_Pa18531	Pandoraea_apista_PA200	Pandoraea_apista_PA201	Pandoraea_apista_TF80G25	Pandoraea_apista_TF81F4	Pandoraea_aquatica_LMG31011T	Pandoraea_bronchicola_LMG20603T	Pandoraea_capi_ISTKB	Pandoraea_capi_LMG20602T	Pandoraea_captiosa_LMG31118T	Pandoraea_cepalis_B-6	Pandoraea_cepalis_LMG31106T	Pandoraea_cepalis_LMG31107	Pandoraea_commovens_LMG31010T	Pandoraea_communis_LMG31110T	Pandoraea_communis_LMG31111	Pandoraea_communis_SD6-2	Pandoraea_eparura_LMG31012T	Pandoraea_faecigallinarum_DSM23572T	Pandoraea_fibrosis_6399T	Pandoraea_fibrosis_7641	Pandoraea_fibrosis_LMG31113	Pandoraea_horticolens_LMG31112T	Pandoraea_iniqua_LMG31009T	Pandoraea_iniqua_LMG31115	Pandoraea_morbifera_LMG31116T	Pandoraea_norimbergensis_DSM11628T	Pandoraea_nosoerga_LMG31109T	Pandoraea_oxalativorans_DSM23570T	Pandoraea_pneumonica_LMG31114T	Pandoraea_pnomenusa_3kgm
Ca.Pandoraea_novymonadis_E262	100	70.2469	70.4863	70.1875	70.3062	70.1126	70.1977	70.4434	70.3533	70.3023	70.1353	70.1678	70.5401	70.2652	70.1881	70.3354	70.4879	70.2547	70.3995	70.2334	70.067	70.2531	70.2695	70.4169	70.3035	70.2342	70.3278	70.2526	70.0337	70.2011	70.3016	70.0645	70.2816	70.4312	70.5628	70.141	70.5841	70.1878	70.3893	70.3457	70.188	70.4943	70.316	70.2087	70.4402	70.3107	70.332	70.4707	70.1264
Pandoraea_anapnoica_LMG31117T	70.2469	100	84.8018	83.2676	83.1727	83.1351	83.13	83.3867	83.2161	83.239	83.2768	83.4055	83.1179	83.3604	83.2863	83.2487	83.4295	83.3472	83.6205	83.0954	83.1194	83.0114	83.018	92.545	83.7235	84.9229	84.8762	84.1247	83.4253	83.2424	83.291	93.9567	83.3158	83.4514	83.2415	83.4732	84.5931	83.5966	83.3826	83.4696	83.4657	82.7152	81.8287	82.8742	81.6288	83.2385	92.881	81.7866	82.7852
Pandoraea_anhela_LMG31108T	70.4863	84.8018	100	83.205	83.2073	83.2161	83.3148	83.5075	83.3273	83.5025	83.4408	83.5081	83.3707	83.5169	83.4935	83.5973	83.4351	83.5314	83.5164	83.2656	83.2018	83.1987	83.2006	84.7939	83.8524	87.4804	87.3414	84.4745	83.4987	83.4305	83.4695	84.5388	83.5462	83.4917	83.4805	83.6654	85.159	83.5279	83.5567	83.5983	83.4554	81.8004	81.6552	82.8652	81.7321	83.1923	84.6583	81.6511	82.9767
Pandoraea_apista_AU2161	70.1875	83.2676	83.205	100	99.2868	99.4558	99.3058	99.3628	99.3593	99.3739	99.3776	99.4419	99.216	99.375	99.3763	99.3621	99.3673	99.3867	99.3498	99.4139	99.4102	99.9913	99.9911	83.5299	88.0686	83.5654	83.4803	82.7459	84.933	84.85	85.1339	83.5201	88.116	88.0713	88.2303	85.0634	83.2458	89.1669	89.0827	89.0896	88.2068	82.3116	82.1592	83.0786	82.4407	83.0878	83.2431	82.1265	83.2767
Pandoraea_apista_DSM16535T	70.3062	83.1727	83.2073	99.2868	100	99.2964	99.1824	99.1765	99.2012	99.2035	99.2484	99.2759	99.1771	99.1855	99.2353	99.2119	99.17	99.2076	99.2014	99.7631	99.7682	99.3295	99.3294	83.4688	88.2619	83.5748	83.3499	82.7912	85.0287	84.876	84.9048	83.2007	88.4603	88.0192	88.1706	85.0025	83.0648	89.2398	89.2552	89.1354	88.2195	82.3913	82.3564	83.2372	82.1992	83.165	83.293	82.0974	83.257
Pandoraea_apista_FDAARGOS126	70.1126	83.1351	83.2161	99.4558	99.2964	100	99.3889	99.4287	99.4562	99.4326	99.4679	99.4643	99.4111	99.4739	99.4761	99.4718	99.4435	99.4706	99.4637	99.4146	99.4121	99.4556	99.4552	83.2651	88.0128	83.3157	83.3821	82.7633	84.9468	84.8534	84.8199	83.1704	88.2238	87.9937	88.1725	84.9659	83.1441	89.2207	89.2481	89.1662	88.1041	82.2825	82.1445	83.2187	82.2402	83.121	83.2221	81.9664	83.2572
Pandoraea_apista_LMG18089	70.1977	83.13	83.3148	99.3058	99.1824	99.3889	100	99.2238	99.2487	99.2675	99.3228	99.3481	99.8972	99.2318	99.2955	99.218	99.2128	99.1869	99.2529	99.4337	99.4114	99.2746	99.2744	83.2288	88.0731	83.2366	83.1967	82.8941	85.1655	84.9012	84.8498	83.3257	88.1686	88.032	88.1283	85.2321	83.1383	89.155	89.0263	89.2055	88.0687	82.2907	82.2904	83.243	82.1594	83.2236	83.1898	81.9276	83.2578
Pandoraea_apista_Pa13324	70.4434	83.3867	83.5075	99.3628	99.1765	99.4287	99.2238	100	99.9033	99.9892	99.995	99.8823	99.2242	99.9427	99.9902	99.902	99.9003	99.9071	99.9841	99.3434	99.3478	99.3953	99.3983	83.3056	88.0668	83.3478	83.2823	82.8647	85.1768	85.0582	85.0036	83.1405	88.2178	87.9486	88.1879	85.3807	83.1937	89.3681	89.4081	89.0459	88.0145	82.1626	82.0581	83.1127	82.31	83.118	83.0879	81.9798	83.0932
Pandoraea_apista_Pa14367	70.3533	83.2161	83.3273	99.3593	99.2012	99.4562	99.2487	99.9033	100	99.9017	99.9673	99.9494	99.1789	99.9805	99.9828	99.9561	99.9754	99.9551	99.9702	99.3251	99.3395	99.3758	99.3761	83.3789	88.0517	83.2883	83.2128	82.751	85.4091	84.9709	84.8627	83.1644	88.1542	88.1697	88.1723	85.1457	83.0536	89.2317	89.2192	89.0957	88.1222	82.2148	82.0836	83.216	82.29	83.2353	83.1891	81.7983	83.1942
Pandoraea_apista_Pa14697	70.3023	83.239	83.5025	99.3739	99.2035	99.4326	99.2675	99.9892	99.9017	100	99.9921	99.8756	99.2379	99.9306	99.9912	99.9154	99.8941	99.9003	99.9827	99.3491	99.3395	99.3958	99.3957	83.1833	88.0693	83.4991	83.3269	82.8469	85.3128	85.0978	84.8916	83.2759	88.1824	88.0338	88.2899	85.2815	83.0206	89.2757	89.2899	89.1666	87.9924	82.2961	82.1447	83.3253	82.354	83.0941	83.1261	82.0913	83.1154
Pandoraea_apista_Pa15518	70.1353	83.2768	83.4408	99.3776	99.2484	99.4679	99.3228	99.995	99.9673	99.9921	100	99.9533	99.2863	99.9849	99.9903	99.9876	99.9739	99.9845	99.9864	99.412	99.4194	99.3832	99.3833	83.2549	88.2209	83.3538	83.2635	82.7287	85.2929	85.0711	84.8828	83.2819	88.2245	88.0967	88.213	85.2916	83.1203	89.2978	89.2654	89.208	88.0891	82.228	82.1905	83.2161	82.4085	83.1095	83.1871	81.9095	83.2626
Pandoraea_apista_Pa15674	70.1678	83.4055	83.5081	99.4419	99.2759	99.4643	99.3481	99.8823	99.9494	99.8756	99.9533	100	99.4359	99.9733	99.9617	99.9038	99.9451	99.8874	99.9483	99.3527	99.3524	99.4653	99.4655	83.3454	88.185	83.3916	83.2915	82.7894	85.1364	84.9991	84.9879	83.5109	88.2095	88.0282	88.2648	85.0009	83.148	89.3927	89.2354	89.1824	88.037	82.3974	82.2756	83.2431	82.4033	83.1694	83.3019	81.9583	83.3646
Pandoraea_apista_Pa16226	70.5401	83.1179	83.3707	99.216	99.1771	99.4111	99.8972	99.2242	99.1789	99.2379	99.2863	99.4359	100	99.289	99.3184	99.1931	99.2153	99.254	99.3082	99.3925	99.3901	99.2448	99.2447	83.5265	88.1016	83.432	83.4392	83.0054	85.247	84.9764	84.9792	83.2692	88.1413	88.1829	88.1636	85.4423	83.0807	89.1205	89.2599	89.1022	88.1194	82.3966	82.153	83.4947	82.3754	83.2251	83.3367	81.8892	83.2486
Pandoraea_apista_Pa16800	70.2652	83.3604	83.5169	99.375	99.1855	99.4739	99.2318	99.9427	99.9805	99.9306	99.9849	99.9733	99.289	100	99.9809	99.9442	99.9705	99.9332	99.9688	99.381	99.3878	99.3707	99.3707	83.4396	88.1963	83.4168	83.3294	82.9128	85.1677	85.1228	84.9681	83.2487	88.1235	88.0026	88.3618	85.3661	83.081	89.1921	89.2128	89.1872	88.0099	82.2619	82.1597	83.272	82.3696	83.1495	83.2158	81.9391	83.2764
Pandoraea_apista_Pa17292	70.1881	83.2863	83.4935	99.3763	99.2353	99.4761	99.2955	99.9902	99.9828	99.9912	99.9903	99.9617	99.3184	99.9809	100	99.9851	99.9702	99.9788	99.9895	99.3914	99.4073	99.3816	99.3816	83.3147	88.1851	83.4365	83.3371	82.7543	85.3393	85.051	84.9904	83.3842	88.2018	88.1772	88.1623	85.4276	83.1152	89.2497	89.2425	89.1425	88.1336	82.1278	82.0468	83.2113	82.3097	83.1067	83.1325	81.9298	83.1613
Pandoraea_apista_Pa18364	70.3354	83.2487	83.5973	99.3621	99.2119	99.4718	99.218	99.902	99.9561	99.9154	99.9876	99.9038	99.1931	99.9442	99.9851	100	99.9766	99.9859	99.971	99.3188	99.3421	99.3789	99.3784	83.4091	88.286	83.4913	83.3648	82.7725	85.4233	84.9891	84.9595	83.2741	88.2098	88.1214	88.246	85.1824	83.144	89.3325	89.2689	89.2095	88.1084	82.2452	82.0978	83.3317	82.304	83.2009	83.1695	81.996	83.1263
Pandoraea_apista_Pa18384	70.4879	83.4295	83.4351	99.3673	99.17	99.4435	99.2128	99.9003	99.9754	99.8941	99.9739	99.9451	99.2153	99.9705	99.9702	99.9766	100	99.9724	99.9586	99.3365	99.3438	99.3489	99.349	83.4132	88.2038	83.3739	83.2737	82.7486	85.4216	85.1236	84.988	83.243	88.1924	88.0123	88.17	85.2982	83.0534	89.3451	89.3669	89.1898	87.9629	82.3479	82.1445	83.2228	82.3403	83.1746	83.2102	81.8452	83.1384
Pandoraea_apista_Pa18495	70.2547	83.3472	83.5314	99.3867	99.2076	99.4706	99.1869	99.9071	99.9551	99.9003	99.9845	99.8874	99.254	99.9332	99.9788	99.9859	99.9724	100	99.9745	99.3217	99.3384	99.3844	99.3842	83.3707	88.176	83.3782	83.3266	82.8323	85.4562	84.9897	85.0302	83.2829	88.2182	88.0521	88.2721	85.1843	83.1742	89.3369	89.3137	89.2625	88.0754	82.2495	82.1071	83.296	82.3601	83.1103	83.186	81.9864	83.1295
Pandoraea_apista_Pa18531	70.3995	83.6205	83.5164	99.3498	99.2014	99.4637	99.2529	99.9841	99.9702	99.9827	99.9864	99.9483	99.3082	99.9688	99.9895	99.971	99.9586	99.9745	100	99.3988	99.4045	99.3956	99.3956	83.4798	88.18	83.4416	83.463	82.8204	85.2778	85.1591	85.0793	83.2651	88.2117	88.0679	88.2252	85.3841	83.3348	89.3167	89.2109	89.2028	88.1106	82.2597	82.1376	83.194	82.3958	83.1658	83.226	81.9241	83.2198
Pandoraea_apista_PA200	70.2334	83.0954	83.2656	99.4139	99.7631	99.4146	99.4337	99.3434	99.3251	99.3491	99.412	99.3527	99.3925	99.381	99.3914	99.3188	99.3365	99.3217	99.3988	100	99.9901	99.4044	99.4041	83.4479	88.0999	83.2607	83.327	82.7997	84.943	84.9239	84.8714	83.2033	88.077	87.9647	88.119	85.0465	83.0903	89.4029	89.3055	88.9509	88.1414	82.2814	82.238	83.3006	82.1627	83.2123	83.2402	81.8562	83.1729
Pandoraea_apista_PA201	70.067	83.1194	83.2018	99.4102	99.7682	99.4121	99.4114	99.3478	99.3395	99.3395	99.4194	99.3524	99.3901	99.3878	99.4073	99.3421	99.3438	99.3384	99.4045	99.9901	100	99.4016	99.4014	83.3233	88.0992	83.1627	83.3379	82.84	84.9159	84.892	84.9245	83.3761	88.0741	88.0262	88.1953	85.0588	83.0642	89.3	89.2308	88.997	88.1278	82.1361	82.1187	83.0836	82.2341	83.1141	83.1335	81.7909	83.1735
Pandoraea_apista_TF80G25	70.2531	83.0114	83.1987	99.9913	99.3295	99.4556	99.2746	99.3953	99.3758	99.3958	99.3832	99.4653	99.2448	99.3707	99.3816	99.3789	99.3489	99.3844	99.3956	99.4044	99.4016	100	99.9997	83.3885	88.0553	83.3734	83.2813	82.6634	85.0376	84.8008	84.9632	83.3376	88.1747	88.1731	88.2246	84.9093	83.1348	89.0678	89.1054	89.026	88.2142	82.4172	82.1387	83.1682	82.4738	83.1882	83.1298	82.0061	83.4077
Pandoraea_apista_TF81F4	70.2695	83.018	83.2006	99.9911	99.3294	99.4552	99.2744	99.3983	99.3761	99.3957	99.3833	99.4655	99.2447	99.3707	99.3816	99.3784	99.349	99.3842	99.3956	99.4041	99.4014	99.9997	100	83.3939	88.0557	83.3665	83.2786	82.6601	85.041	84.7948	84.9734	83.3397	88.1771	88.1787	88.2261	84.9134	83.1354	89.0739	89.1056	89.0274	88.2138	82.4184	82.1362	83.168	82.4721	83.1904	83.1286	82.01	83.4135
Pandoraea_aquatica_LMG31011T	70.4169	92.545	84.7939	83.5299	83.4688	83.2651	83.2288	83.3056	83.3789	83.1833	83.2549	83.3454	83.5265	83.4396	83.3147	83.4091	83.4132	83.3707	83.4798	83.4479	83.3233	83.3885	83.3939	100	83.8651	85.0309	84.9287	84.3166	83.6098	83.6858	83.6282	92.705	83.7556	83.6612	83.6189	83.6971	84.7761	83.6315	83.543	83.5893	83.5615	81.9705	81.9737	83.0444	82.0028	83.4308	91.7798	81.9465	83.1375
Pandoraea_bronchicola_LMG20603T	70.3035	83.7235	83.8524	88.0686	88.2619	88.0128	88.0731	88.0668	88.0517	88.0693	88.2209	88.185	88.1016	88.1963	88.1851	88.286	88.2038	88.176	88.18	88.0999	88.0992	88.0553	88.0557	83.8651	100	83.8507	83.8851	83.2494	86.0421	85.8885	85.8337	83.8126	89.3197	89.2754	89.4571	86.1328	83.542	88.3494	88.3486	88.1805	89.4343	82.6123	82.7935	83.5481	82.5976	83.7379	83.7283	82.4126	83.6919
Pandoraea_capi_ISTKB	70.2342	84.9229	87.4804	83.5654	83.5748	83.3157	83.2366	83.3478	83.2883	83.4991	83.3538	83.3916	83.432	83.4168	83.4365	83.4913	83.3739	83.3782	83.4416	83.2607	83.1627	83.3734	83.3665	85.0309	83.8507	100	96.4323	84.8054	83.6681	83.5781	83.5498	85.1231	83.7401	83.7092	83.5816	83.7926	85.5286	83.6377	83.6428	83.4388	83.6402	82.078	81.9285	83.1714	81.8638	83.3916	85.0337	81.8928	83.1023
Pandoraea_capi_LMG20602T	70.3278	84.8762	87.3414	83.4803	83.3499	83.3821	83.1967	83.2823	83.2128	83.3269	83.2635	83.2915	83.4392	83.3294	83.3371	83.3648	83.2737	83.3266	83.463	83.327	83.3379	83.2813	83.2786	84.9287	83.8851	96.4323	100	84.687	83.5725	83.3813	83.4606	84.9774	83.5337	83.4777	83.4895	83.6401	85.1766	83.7884	83.7898	83.3908	83.5698	82.0035	81.9304	82.9891	81.794	83.2657	84.8142	81.8669	83.0955
Pandoraea_captiosa_LMG31118T	70.2526	84.1247	84.4745	82.7459	82.7912	82.7633	82.8941	82.8647	82.751	82.8469	82.7287	82.7894	83.0054	82.9128	82.7543	82.7725	82.7486	82.8323	82.8204	82.7997	82.84	82.6634	82.6601	84.3166	83.2494	84.8054	84.687	100	82.9813	82.9797	82.7943	84.1727	83.0944	83.0474	82.9284	83.103	85.4474	82.9894	83.0165	82.8491	82.9742	81.5573	81.3519	82.7026	81.445	82.7877	84.0138	81.2737	82.6447
Pandoraea_cepalis_B-6	70.0337	83.4253	83.4987	84.933	85.0287	84.9468	85.1655	85.1768	85.4091	85.3128	85.2929	85.1364	85.247	85.1677	85.3393	85.4233	85.4216	85.4562	85.2778	84.943	84.9159	85.0376	85.041	83.6098	86.0421	83.6681	83.5725	82.9813	100	98.3599	96.216	83.3924	85.4643	85.5337	85.4887	90.714	83.2499	85.2513	85.2675	85.2745	85.4272	82.7386	82.694	83.4257	82.5321	83.7575	83.5422	82.3274	83.5586
Pandoraea_cepalis_LMG31106T	70.2011	83.2424	83.4305	84.85	84.876	84.8534	84.9012	85.0582	84.9709	85.0978	85.0711	84.9991	84.9764	85.1228	85.051	84.9891	85.1236	84.9897	85.1591	84.9239	84.892	84.8008	84.7948	83.6858	85.8885	83.5781	83.3813	82.9797	98.3599	100	96.2817	83.3303	85.5292	85.4153	85.5459	90.8226	83.2235	85.0901	85.0794	85.0209	85.4191	82.3622	82.4151	83.4817	82.3358	83.6263	83.3058	82.1668	83.5012
Pandoraea_cepalis_LMG31107	70.3016	83.291	83.4695	85.1339	84.9048	84.8199	84.8498	85.0036	84.8627	84.8916	84.8828	84.9879	84.9792	84.9681	84.9904	84.9595	84.988	85.0302	85.0793	84.8714	84.9245	84.9632	84.9734	83.6282	85.8337	83.5498	83.4606	82.7943	96.216	96.2817	100	83.3882	85.3003	85.207	85.3109	90.313	83.2093	85.0785	85.1891	85.1268	85.3406	82.4603	82.5437	83.5501	82.4446	83.6491	83.4734	82.1624	83.454
Pandoraea_commovens_LMG31010T	70.0645	93.9567	84.5388	83.5201	83.2007	83.1704	83.3257	83.1405	83.1644	83.2759	83.2819	83.5109	83.2692	83.2487	83.3842	83.2741	83.243	83.2829	83.2651	83.2033	83.3761	83.3376	83.3397	92.705	83.8126	85.1231	84.9774	84.1727	83.3924	83.3303	83.3882	100	83.5877	83.4758	83.529	83.4292	84.6014	83.5415	83.4523	83.5106	83.332	81.9658	81.9419	82.8202	81.7996	83.0522	92.9441	81.863	82.789
Pandoraea_communis_LMG31110T	70.2816	83.3158	83.5462	88.116	88.4603	88.2238	88.1686	88.2178	88.1542	88.1824	88.2245	88.2095	88.1413	88.1235	88.2018	88.2098	88.1924	88.2182	88.2117	88.077	88.0741	88.1747	88.1771	83.7556	89.3197	83.7401	83.5337	83.0944	85.4643	85.5292	85.3003	83.5877	100	97.7148	99.2973	85.4646	83.2853	88.4254	88.4185	88.3291	95.2723	82.5388	82.3558	83.3769	82.4524	83.4439	83.5276	82.3829	83.4861
Pandoraea_communis_LMG31111	70.4312	83.4514	83.4917	88.0713	88.0192	87.9937	88.032	87.9486	88.1697	88.0338	88.0967	88.0282	88.1829	88.0026	88.1772	88.1214	88.0123	88.0521	88.0679	87.9647	88.0262	88.1731	88.1787	83.6612	89.2754	83.7092	83.4777	83.0474	85.5337	85.4153	85.207	83.4758	97.7148	100	97.6417	85.289	83.2877	88.372	88.3674	88.1535	94.9538	82.5979	82.4468	83.3664	82.6906	83.2728	83.5394	82.1612	83.3471
Pandoraea_communis_SD6-2	70.5628	83.2415	83.4805	88.2303	88.1706	88.1725	88.1283	88.1879	88.1723	88.2899	88.213	88.2648	88.1636	88.3618	88.1623	88.246	88.17	88.2721	88.2252	88.119	88.1953	88.2246	88.2261	83.6189	89.4571	83.5816	83.4895	82.9284	85.4887	85.5459	85.3109	83.529	99.2973	97.6417	100	85.3217	83.1844	88.4187	88.4422	88.4021	95.2885	82.4247	82.6541	83.3865	82.4606	83.3786	83.4148	82.2823	83.4318
Pandoraea_eparura_LMG31012T	70.141	83.4732	83.6654	85.0634	85.0025	84.9659	85.2321	85.3807	85.1457	85.2815	85.2916	85.0009	85.4423	85.3661	85.4276	85.1824	85.2982	85.1843	85.3841	85.0465	85.0588	84.9093	84.9134	83.6971	86.1328	83.7926	83.6401	83.103	90.714	90.8226	90.313	83.4292	85.4646	85.289	85.3217	100	83.4736	85.24	85.1556	85.3987	85.4346	82.7684	82.6428	83.786	82.8094	83.9826	83.8097	82.4993	83.794
Pandoraea_faecigallinarum_DSM23572T	70.5841	84.5931	85.159	83.2458	83.0648	83.1441	83.1383	83.1937	83.0536	83.0206	83.1203	83.148	83.0807	83.081	83.1152	83.144	83.0534	83.1742	83.3348	83.0903	83.0642	83.1348	83.1354	84.7761	83.542	85.5286	85.1766	85.4474	83.2499	83.2235	83.2093	84.6014	83.2853	83.2877	83.1844	83.4736	100	83.2008	83.2599	83.2619	83.2822	81.8843	81.7262	82.9073	81.9651	83.1545	84.6015	81.6402	82.9329
Pandoraea_fibrosis_6399T	70.1878	83.5966	83.5279	89.1669	89.2398	89.2207	89.155	89.3681	89.2317	89.2757	89.2978	89.3927	89.1205	89.1921	89.2497	89.3325	89.3451	89.3369	89.3167	89.4029	89.3	89.0678	89.0739	83.6315	88.3494	83.6377	83.7884	82.9894	85.2513	85.0901	85.0785	83.5415	88.4254	88.372	88.4187	85.24	83.2008	100	99.9932	98.9095	88.3366	82.3868	82.4664	83.3244	82.3705	83.3634	83.4486	82.3595	83.4531
Pandoraea_fibrosis_7641	70.3893	83.3826	83.5567	89.0827	89.2552	89.2481	89.0263	89.4081	89.2192	89.2899	89.2654	89.2354	89.2599	89.2128	89.2425	89.2689	89.3669	89.3137	89.2109	89.3055	89.2308	89.1054	89.1056	83.543	88.3486	83.6428	83.7898	83.0165	85.2675	85.0794	85.1891	83.4523	88.4185	88.3674	88.4422	85.1556	83.2599	99.9932	100	98.9104	88.3252	82.5635	82.4159	83.3269	82.3537	83.3263	83.5611	82.2334	83.4532
Pandoraea_fibrosis_LMG31113	70.3457	83.4696	83.5983	89.0896	89.1354	89.1662	89.2055	89.0459	89.0957	89.1666	89.208	89.1824	89.1022	89.1872	89.1425	89.2095	89.1898	89.2625	89.2028	88.9509	88.997	89.026	89.0274	83.5893	88.1805	83.4388	83.3908	82.8491	85.2745	85.0209	85.1268	83.5106	88.3291	88.1535	88.4021	85.3987	83.2619	98.9095	98.9104	100	88.2655	82.3527	82.4502	83.287	82.3341	83.3996	83.4417	82.1626	83.2735
Pandoraea_horticolens_LMG31112T	70.188	83.4657	83.4554	88.2068	88.2195	88.1041	88.0687	88.0145	88.1222	87.9924	88.0891	88.037	88.1194	88.0099	88.1336	88.1084	87.9629	88.0754	88.1106	88.1414	88.1278	88.2142	88.2138	83.5615	89.4343	83.6402	83.5698	82.9742	85.4272	85.4191	85.3406	83.332	95.2723	94.9538	95.2885	85.4346	83.2822	88.3366	88.3252	88.2655	100	82.5105	82.3198	83.2986	82.1427	83.4706	83.43	82.2316	83.3303
Pandoraea_iniqua_LMG31009T	70.4943	82.7152	81.8004	82.3116	82.3913	82.2825	82.2907	82.1626	82.2148	82.2961	82.228	82.3974	82.3966	82.2619	82.1278	82.2452	82.3479	82.2495	82.2597	82.2814	82.1361	82.4172	82.4184	81.9705	82.6123	82.078	82.0035	81.5573	82.7386	82.3622	82.4603	81.9658	82.5388	82.5979	82.4247	82.7684	81.8843	82.3868	82.5635	82.3527	82.5105	100	97.7845	81.9176	93.4236	82.7335	81.8894	86.4724	82.119
Pandoraea_iniqua_LMG31115	70.316	81.8287	81.6552	82.1592	82.3564	82.1445	82.2904	82.0581	82.0836	82.1447	82.1905	82.2756	82.153	82.1597	82.0468	82.0978	82.1445	82.1071	82.1376	82.238	82.1187	82.1387	82.1362	81.9737	82.7935	81.9285	81.9304	81.3519	82.694	82.4151	82.5437	81.9419	82.3558	82.4468	82.6541	82.6428	81.7262	82.4664	82.4159	82.4502	82.3198	97.7845	100	81.8875	93.34	82.8494	82.0115	86.5548	81.9876
Pandoraea_morbifera_LMG31116T	70.2087	82.8742	82.8652	83.0786	83.2372	83.2187	83.243	83.1127	83.216	83.3253	83.2161	83.2431	83.4947	83.272	83.2113	83.3317	83.2228	83.296	83.194	83.3006	83.0836	83.1682	83.168	83.0444	83.5481	83.1714	82.9891	82.7026	83.4257	83.4817	83.5501	82.8202	83.3769	83.3664	83.3865	83.786	82.9073	83.3244	83.3269	83.287	83.2986	81.9176	81.8875	100	82.0186	83.703	82.8496	81.6612	94.7299
Pandoraea_norimbergensis_DSM11628T	70.4402	81.6288	81.7321	82.4407	82.1992	82.2402	82.1594	82.31	82.29	82.354	82.4085	82.4033	82.3754	82.3696	82.3097	82.304	82.3403	82.3601	82.3958	82.1627	82.2341	82.4738	82.4721	82.0028	82.5976	81.8638	81.794	81.445	82.5321	82.3358	82.4446	81.7996	82.4524	82.6906	82.4606	82.8094	81.9651	82.3705	82.3537	82.3341	82.1427	93.4236	93.34	82.0186	100	82.4572	81.852	86.5637	81.9685
Pandoraea_nosoerga_LMG31109T	70.3107	83.2385	83.1923	83.0878	83.165	83.121	83.2236	83.118	83.2353	83.0941	83.1095	83.1694	83.2251	83.1495	83.1067	83.2009	83.1746	83.1103	83.1658	83.2123	83.1141	83.1882	83.1904	83.4308	83.7379	83.3916	83.2657	82.7877	83.7575	83.6263	83.6491	83.0522	83.4439	83.2728	83.3786	83.9826	83.1545	83.3634	83.3263	83.3996	83.4706	82.7335	82.8494	83.703	82.4572	100	83.0824	82.4234	83.6839
Pandoraea_oxalativorans_DSM23570T	70.332	92.881	84.6583	83.2431	83.293	83.2221	83.1898	83.0879	83.1891	83.1261	83.1871	83.3019	83.3367	83.2158	83.1325	83.1695	83.2102	83.186	83.226	83.2402	83.1335	83.1298	83.1286	91.7798	83.7283	85.0337	84.8142	84.0138	83.5422	83.3058	83.4734	92.9441	83.5276	83.5394	83.4148	83.8097	84.6015	83.4486	83.5611	83.4417	83.43	81.8894	82.0115	82.8496	81.852	83.0824	100	81.6808	82.749
Pandoraea_pneumonica_LMG31114T	70.4707	81.7866	81.6511	82.1265	82.0974	81.9664	81.9276	81.9798	81.7983	82.0913	81.9095	81.9583	81.8892	81.9391	81.9298	81.996	81.8452	81.9864	81.9241	81.8562	81.7909	82.0061	82.01	81.9465	82.4126	81.8928	81.8669	81.2737	82.3274	82.1668	82.1624	81.863	82.3829	82.1612	82.2823	82.4993	81.6402	82.3595	82.2334	82.1626	82.2316	86.4724	86.5548	81.6612	86.5637	82.4234	81.6808	100	81.7838
Pandoraea_pnomenusa_3kgm	70.1264	82.7852	82.9767	83.2767	83.257	83.2572	83.2578	83.0932	83.1942	83.1154	83.2626	83.3646	83.2486	83.2764	83.1613	83.1263	83.1384	83.1295	83.2198	83.1729	83.1735	83.4077	83.4135	83.1375	83.6919	83.1023	83.0955	82.6447	83.5586	83.5012	83.454	82.789	83.4861	83.3471	83.4318	83.794	82.9329	83.4531	83.4532	83.2735	83.3303	82.119	81.9876	94.7299	81.9685	83.6839	82.749	81.7838	100
Pandoraea_pnomenusa_DSM16536T	70.0131	82.902	83.1038	83.4835	83.278	83.4197	83.2397	83.3047	83.3865	83.4119	83.2466	83.2948	83.2788	83.2819	83.3388	83.2517	83.2253	83.2734	83.4732	83.3364	83.4252	83.3743	83.3741	83.2422	84.0535	83.2895	83.1738	82.7427	83.6147	83.7825	83.6952	82.9375	83.638	83.5956	83.3956	83.785	82.9824	83.5211	83.518	83.4843	83.6042	82.2285	81.9751	94.8898	82.1119	83.6403	83.0832	81.8017	99.2763
Pandoraea_pnomenusa_E26	70.1973	82.9169	83.0897	83.3143	83.3227	83.1576	83.1745	83.1915	83.2027	83.2331	83.2645	83.1891	83.2416	83.3197	83.2339	83.1548	83.2374	83.2501	83.2324	83.0764	83.1783	83.352	83.3447	83.104	83.8574	83.1963	83.1493	82.6147	83.7413	83.4714	83.5672	82.9246	83.5134	83.4975	83.57	83.9183	82.8863	83.5733	83.4744	83.321	83.3109	82.1146	82.0083	94.7877	82.0054	83.6977	82.9607	81.7164	99.4598
Pandoraea_pnomenusa_LMG31119	69.9819	82.8029	83.0086	83.2417	83.2907	83.2062	83.1324	83.0648	83.3011	83.3111	83.453	83.3151	83.2556	83.1952	83.3194	83.3762	83.33	83.3869	83.1774	83.2575	83.1945	83.2688	83.2684	83.0054	84.0061	83.1338	82.9763	82.6835	83.495	83.4816	83.5855	82.9059	83.5705	83.3632	83.4986	83.9107	82.8074	83.512	83.6164	83.4247	83.4167	82.0154	82.0009	94.8562	81.8846	83.4925	82.7964	81.6557	99.3489
Pandoraea_pnomenusa_MCB032	70.4339	82.7055	82.9572	83.2778	83.3015	83.2857	83.2017	83.4138	83.2618	83.273	83.0821	83.3448	83.3172	83.2256	83.2081	83.2286	83.2849	83.3247	83.3526	83.1756	83.2074	83.1798	83.1777	83.0184	83.9842	83.1264	82.9599	82.4658	83.6195	83.4985	83.6361	82.7401	83.6013	83.5653	83.6387	83.9873	82.7529	83.5089	83.4791	83.3729	83.5414	82.053	81.973	94.8536	81.986	83.4848	82.7672	81.7622	99.2979
Pandoraea_pnomenusa_RB38	70.2094	82.8028	82.9014	83.2371	83.2096	83.2853	83.2894	83.1849	83.1722	83.152	83.2971	83.3448	83.3094	83.1953	83.2909	83.1643	83.1343	83.2398	83.3398	83.2985	83.2553	83.2769	83.2796	83.0537	83.7667	83.0993	83.0635	82.6297	83.57	83.5611	83.5826	82.8085	83.4531	83.3155	83.4435	83.8229	82.9372	83.4193	83.557	83.3466	83.3694	82.058	82.049	94.7496	82.0799	83.7229	82.8027	81.5373	99.4357
Pandoraea_pnomenusa_RB-44	70.5692	83.0375	83.1221	83.3616	83.3308	83.2032	83.3152	83.3241	83.3789	83.3713	83.2373	83.4216	83.2965	83.2691	83.3921	83.2284	83.2651	83.2662	83.5267	83.2106	83.1101	83.3619	83.3634	83.2262	83.9087	83.4604	83.0066	82.6641	83.6111	83.7502	83.7362	82.933	83.5233	83.58	83.6173	83.8949	82.8431	83.5778	83.463	83.3491	83.4877	82.1037	82.0165	94.7833	81.8751	83.781	82.9693	81.8081	99.4566
Pandoraea_pulmonicola_DSM16583T	70.1106	82.9875	83.2794	83.4387	83.5226	83.4923	83.3832	83.3523	83.3862	83.3999	83.3834	83.3889	83.3795	83.4802	83.2744	83.5266	83.3824	83.4966	83.4488	83.4361	83.3438	83.254	83.2556	83.3045	83.9971	83.4706	83.3453	82.8614	83.9976	83.818	83.9768	83.2225	83.7778	83.7056	83.8091	84.1352	83.173	83.6092	83.6818	83.6669	83.9016	82.5071	82.5302	83.6735	82.5832	88.1208	83.1019	82.3635	83.6827
Pandoraea_soli_LMG31014T	70.1187	83.1894	83.4635	85.1262	84.9379	84.7848	84.98	84.9319	84.8023	85.0075	84.9542	84.9063	84.9447	84.9187	85.0377	85.0439	84.9414	84.9589	85.0204	85.0686	85.0477	84.9691	84.9681	83.6407	86.1671	83.6354	83.4191	82.9571	95.5944	95.7643	94.9818	83.2472	85.5216	85.4595	85.4254	90.4812	83.402	85.2764	85.3705	85.1882	85.474	82.4691	82.3697	83.5971	82.4626	83.7205	83.5267	82.1975	83.4866
Pandoraea_sp._PE-S2R-1	70.1159	81.7526	81.6909	82.1988	82.2387	82.2704	82.1579	82.0081	82.1643	82.2679	82.2348	82.2965	82.2419	82.148	82.13	82.1601	82.0983	82.0301	82.223	82.2373	82.1731	82.1492	82.1464	81.947	82.5993	81.8838	81.9642	81.6032	82.5038	82.2834	82.4519	82.0053	82.356	82.4313	82.4549	82.6499	81.866	82.4084	82.6714	82.3011	82.4167	94.0379	94.0389	81.8554	94.3628	82.6703	81.9136	86.4363	81.922
Pandoraea_sp._PE-S2T-3	70.5376	81.7711	81.7204	82.2424	82.1705	82.2342	82.2258	82.2131	82.3374	82.3403	82.3088	82.2645	82.2151	82.2659	82.314	82.1797	82.1199	82.3606	82.2557	82.1966	82.2382	82.2289	82.2252	82.0009	82.6528	81.9523	81.7911	81.6149	82.5717	82.3888	82.3711	81.8891	82.372	82.4785	82.3376	82.9411	81.8877	82.3494	82.4073	82.3873	82.3796	93.9888	94.0261	82.0359	94.4038	82.5123	81.7114	86.2737	81.8891
Pandoraea_sputorum_DSM21091T	70.4435	93.2726	84.4908	83.0905	83.297	83.0968	83.2113	83.0794	82.9816	83.0755	83.1232	83.1333	83.0532	83.0299	83.0693	83.1848	83.0121	83.103	83.1054	83.1679	83.0832	83.1159	83.1119	92.1181	83.4921	84.8257	84.7731	84.0134	83.1908	83.1004	83.1568	93.9762	83.3009	83.2718	83.3628	83.3608	84.5683	83.5477	83.4757	83.3589	83.2793	81.6903	81.6346	82.8496	81.7886	82.9228	92.7412	81.4367	82.828
Pandoraea_sputorum_LMG20601	70.2972	93.2712	84.4363	83.103	82.9991	83.1461	82.9543	83.0387	82.8423	83.143	83.0758	83.0609	83.2462	83.0412	82.98	82.974	83.0413	83.0494	83.1153	83.1445	83.0357	83.0949	83.091	92.1525	83.6114	84.8156	84.8247	83.9051	83.1858	83.0361	83.1143	93.9608	83.3311	83.2154	83.1477	83.2965	84.9376	83.4085	83.4419	83.3431	83.3141	81.713	81.6819	82.7749	81.5859	82.9779	92.3324	81.628	82.5711
Pandoraea_sputorum_LMG31120	70.2572	93.3987	84.4506	83.2315	83.1211	82.9653	82.9064	82.9749	82.9666	83.0706	83.1134	83.0634	83.1394	82.992	83.1134	83.1017	83.1852	83.1067	83.1549	83.2382	83.1724	83.003	83.007	92.1035	83.6513	84.8983	84.8875	83.9257	83.3081	83.2747	83.1659	94.0946	83.2781	83.2987	83.3251	83.5101	84.6279	83.3891	83.417	83.2883	83.3217	81.698	81.7351	82.8211	81.6578	82.9199	92.6549	81.6927	82.7262
Pandoraea_sputorum_LMG31121	70.3634	93.2691	84.4156	83.0114	83.1286	83.1178	83.1429	83.0427	83.0198	83.0406	82.9918	83.1173	83.1336	83.1213	83.0357	83.0088	83.0947	83.079	83.0226	83.0156	82.9076	83.0425	83.0409	92.0637	83.6071	84.8565	84.8532	83.8777	83.254	83.1807	83.3502	93.8732	83.3307	83.4964	83.2844	83.3102	84.4449	83.3217	83.2162	83.3362	83.3901	81.7504	81.6448	82.4847	81.7775	82.9598	92.147	81.5163	82.6931
Pandoraea_terrae_LMG30175T	71.3895	77.8677	78.0644	77.7327	77.7771	77.9111	77.7621	77.7275	77.7303	77.734	77.7678	77.9133	77.8021	77.7646	77.8367	77.9991	77.7515	77.9199	77.7835	77.8415	77.7374	77.7844	77.7861	78.1863	78.2327	78.2272	78.1815	77.784	77.9628	77.6677	77.7812	78.0069	77.7572	77.8078	77.8745	78.0635	77.9889	77.9591	77.8065	77.7938	77.8832	78.0547	78.2648	78.0283	78.0882	78.7398	77.9102	77.8468	78.1769
Pandoraea_terrigena_LMG31013T	70.0713	83.3646	83.2672	84.9681	84.9218	84.9477	84.9081	84.9618	84.9146	85.0172	85.0969	85.049	84.976	85.0722	84.9757	85.042	85.0181	85.0994	84.9896	84.9627	84.9486	84.9837	84.9818	83.4907	86.0025	83.6508	83.4696	82.8186	90.175	90.1989	90.4465	83.3273	85.6139	85.5351	85.7763	91.0214	83.2016	85.3083	85.2687	85.147	85.6625	82.4081	82.468	83.4719	82.3216	83.681	83.1514	82.0861	83.5231
Pandoraea_thiooxydans_ATSB16	68.7813	74.1463	74.4832	74.3005	74.2872	74.2183	74.1156	74.1188	74.1351	74.1249	74.0801	74.0824	74.1559	74.1693	74.185	74.1039	74.0745	74.153	74.1402	74.1975	74.1596	74.2312	74.233	74.3982	74.1846	74.3378	74.2848	74.3719	74.5564	74.4126	74.2045	74.2615	74.0358	74.1861	73.9928	74.7613	74.4504	74.2642	74.2633	74.4449	74.2658	74.2957	74.3451	74.5079	74.2756	75.1826	74.4891	74.4469	74.6619
Pandoraea_thiooxydans_DSM25325T	68.7493	74.1483	74.3641	74.1874	74.3339	74.1202	74.0364	74.2402	74.2695	74.2672	74.1633	74.2075	74.3268	74.1752	74.2609	74.2242	74.2561	74.2798	74.1953	74.2809	74.239	74.0526	74.06	74.2084	74.3051	74.3295	74.4303	74.3694	74.5317	74.3617	74.4194	74.4404	74.1397	74.3139	74.0201	74.8767	74.4978	74.2488	74.2898	74.505	74.1587	74.3423	74.3706	74.7519	74.5412	75.1802	74.653	74.4573	74.7738
Pandoraea_vervacti_NS15T	70.253	84.2193	84.8268	82.8922	82.9641	82.7914	82.7731	82.7784	82.8058	82.8669	82.8005	82.7823	82.8726	82.8181	82.6766	82.8849	82.7879	82.8485	82.9096	82.7927	82.7673	82.9241	82.9216	84.4073	83.3542	84.864	84.8333	93.1865	83.0072	82.9814	82.9064	84.3214	83.11	82.975	82.9639	83.2955	85.6083	83.1576	83.0333	82.9587	83.0858	81.6717	81.4359	82.6887	81.7268	83.0173	83.9819	81.355	82.7193
[truncated: 19 more columns]

## Sheet: Caption
Matrix with pairwise Average Nucleotide Identiry (ANI) values as calculated by the OrthoANIu algorithm.
