# Supplementary material for: Comparative Genomics of Pandoraea, a Genus Enriched in Xenobiotic Biodegradation and Metabolism
Source: Front Microbiol. 2019 Nov 6;10:2556. doi: 10.3389/fmicb.2019.02556 (PMC6851202; doi:10.3389/fmicb.2019.02556)
Supplement: Supplementary file 5 [file Table_6.xlsx]

## Sheet: Rtable_ortho
orthogroup	Ca.Pandoraea_novymonadis_E262	Pandoraea_anapnoica_LMG31117T	Pandoraea_anhela_LMG31108T	Pandoraea_apista_AU2161	Pandoraea_apista_DSM16535T	Pandoraea_apista_FDAARGOS126	Pandoraea_apista_LMG18089	Pandoraea_apista_PA200	Pandoraea_apista_PA201	Pandoraea_apista_Pa13324	Pandoraea_apista_Pa14367	Pandoraea_apista_Pa14697	Pandoraea_apista_Pa15518	Pandoraea_apista_Pa15674	Pandoraea_apista_Pa16226	Pandoraea_apista_Pa16800	Pandoraea_apista_Pa17292	Pandoraea_apista_Pa18364	Pandoraea_apista_Pa18384	Pandoraea_apista_Pa18495	Pandoraea_apista_Pa18531	Pandoraea_apista_TF80G25	Pandoraea_apista_TF81F4	Pandoraea_aquatica_LMG31011T	Pandoraea_bronchicola_LMG20603T	Pandoraea_capi_ISTKB	Pandoraea_capi_LMG20602T	Pandoraea_captiosa_LMG31118T	Pandoraea_cepalis_B-6	Pandoraea_cepalis_LMG31106T	Pandoraea_cepalis_LMG31107	Pandoraea_commovens_LMG31010T	Pandoraea_communis_LMG31110T	Pandoraea_communis_LMG31111	Pandoraea_communis_SD6-2	Pandoraea_eparura_LMG31012T	Pandoraea_faecigallinarum_DSM23572T	Pandoraea_fibrosis_6399T	Pandoraea_fibrosis_7641	Pandoraea_fibrosis_LMG31113	Pandoraea_horticolens_LMG31112T	Pandoraea_iniqua_LMG31009T	Pandoraea_iniqua_LMG31115	Pandoraea_morbifera_LMG31116T	Pandoraea_norimbergensis_DSM11628T	Pandoraea_nosoerga_LMG31109T	Pandoraea_oxalativorans_DSM23570T	Pandoraea_pneumonica_LMG31114T	Pandoraea_pnomenusa_3kgm
OG0000000	muhy01000001_pro_550	PAN31117_00908, PAN31117_00910, PAN31117_01420, PAN31117_01642, PAN31117_02761	PAN31108_01814, PAN31108_02005, PAN31108_02758, PAN31108_02760, PAN31108_02791, PAN31108_05043	cp011501_pro_2094, cp011501_pro_2875, cp011501_pro_3867, cp011501_pro_4066, cp011501_pro_4125	cp013481_pro_1135, cp013481_pro_2193, cp013481_pro_2837, cp013481_pro_871, cp013481_pro_932	cp014018_pro_2548, cp014018_pro_3242, cp014018_pro_4290, cp014018_pro_4493, cp014018_pro_4554	PAP18089_01697, PAP18089_01724, PAP18089_01788, PAP18089_02045, PAP18089_02404	rhsh01000004_pro_317, rhsh01000006_pro_136, rhsh01000006_pro_196, rhsh01000022_pro_70, rhsh01000035_pro_5	rhsg01000001_pro_5, rhsg01000002_pro_428, rhsg01000004_pro_120, rhsg01000004_pro_323, rhsg01000004_pro_384	rwhx01000001_pro_31, rwhx01000007_pro_7, rwhx01000017_pro_5, rwhx01000020_pro_21, rwhx01000075_pro_1, rwhx01000075_pro_16, rwhx01000088_pro_5, rwhx01000088_pro_7	pyya01000001_pro_479, pyya01000008_pro_137, pyya01000017_pro_4, pyya01000022_pro_78, pyya01000044_pro_33, pyya01000063_pro_6, pyya01000063_pro_8	rzmt01000001_pro_237, rzmt01000004_pro_140, rzmt01000004_pro_80, rzmt01000014_pro_92, rzmt01000033_pro_1, rzmt01000066_pro_5, rzmt01000066_pro_7	rzmu01000001_pro_410, rzmu01000002_pro_29, rzmu01000002_pro_31, rzmu01000002_pro_352, rzmu01000008_pro_80, rzmu01000009_pro_121, rzmu01000020_pro_6	rwhw01000011_pro_2, rwhw01000040_pro_50, rwhw01000049_pro_29, rwhw01000049_pro_31, rwhw01000121_pro_2, rwhw01000124_pro_3, rwhw01000177_pro_1	nbta01000004_pro_366, nbta01000018_pro_58, nbta01000022_pro_136, nbta01000023_pro_389, nbta01000023_pro_622	rses01000006_pro_55, rses01000013_pro_5, rses01000019_pro_2, rses01000030_pro_19, rses01000094_pro_5, rses01000094_pro_7, rses01000140_pro_1	rzmv01000002_pro_240, rzmv01000009_pro_55, rzmv01000014_pro_79, rzmv01000020_pro_7, rzmv01000029_pro_33, rzmv01000029_pro_48, rzmv01000076_pro_5, rzmv01000076_pro_7	rqxy01000001_pro_183, rqxy01000003_pro_80, rqxy01000012_pro_90, rqxy01000013_pro_29, rqxy01000013_pro_31, rqxy01000067_pro_14, rqxy01000123_pro_1	rser01000002_pro_226, rser01000002_pro_228, rser01000003_pro_146, rser01000005_pro_5, rser01000009_pro_69, rser01000014_pro_4	rrcr01000002_pro_29, rrcr01000002_pro_31, rrcr01000008_pro_55, rrcr01000053_pro_18, rrcr01000063_pro_6, rrcr01000066_pro_2, rrcr01000114_pro_1	rwhv01000011_pro_5, rwhv01000016_pro_2, rwhv01000035_pro_31, rwhv01000070_pro_21, rwhv01000095_pro_5, rwhv01000095_pro_7, rwhv01000124_pro_1	cp011279_pro_1239, cp011279_pro_2231, cp011279_pro_2430, cp011279_pro_2489, cp011279_pro_456	cp010518_pro_1239, cp010518_pro_2230, cp010518_pro_2429, cp010518_pro_2488, cp010518_pro_456	PAQ31011_02492, PAQ31011_02715, PAQ31011_03460, PAQ31011_04413	PBR20603_01129, PBR20603_02000, PBR20603_02460, PBR20603_03309	maos01000029_pro_23, maos01000032_pro_32, maos01000065_pro_7, maos01000094_pro_15	PCA20602_00220, PCA20602_00440, PCA20602_02765	PCA31118_02138, PCA31118_02353, PCA31118_03811, PCA31118_05324	B6_00383, B6_00586, B6_00897, B6_04565	PCE31106_01091, PCE31106_02831, PCE31106_04037, PCE31106_04326, PCE31106_04722	PCE31107_01228, PCE31107_01436, PCE31107_02131, PCE31107_04274, PCE31107_04510, PCE31107_04634	PCO31010_02298, PCO31010_02524, PCO31010_03079, PCO31010_04009, PCO31010_04011, PCO31010_04696	PCO31110_01480, PCO31110_02689, PCO31110_03159, PCO31110_03209, PCO31110_03416, PCO31110_04603	PCO31111_01617, PCO31111_02297, PCO31111_02953, PCO31111_04360, PCO31111_04946	kb944423_pro_213, kb944435_pro_210, kb944443_pro_23, kb944452_pro_194, kb944457_pro_135, kb944457_pro_185	PEP31012_00305, PEP31012_00502, PEP31012_02206, PEP31012_03735, PEP31012_04289	cp011807_pro_1784, cp011807_pro_3451, cp011807_pro_3642	jtcr01000009_pro_157, jtcr01000019_pro_13, jtcr01000021_pro_23, jtcr01000041_pro_1, jtcr01000051_pro_29	jtcs01000015_pro_28, jtcs01000017_pro_117, jtcs01000022_pro_132, jtcs01000028_pro_17, jtcs01000035_pro_34	PFI31113_00262, PFI31113_00565, PFI31113_02026, PFI31113_02102, PFI31113_03902, PFI31113_04842	PHO31112_01213, PHO31112_01489, PHO31112_01969, PHO31112_03159, PHO31112_05011	PIN31009_02247, PIN31009_03834, PIN31009_04060, PIN31009_05386	PIN31115_02437, PIN31115_04060, PIN31115_04362, PIN31115_04981	PMO31116_00623, PMO31116_01707, PMO31116_02338, PMO31116_03190, PMO31116_04183	cp013480_pro_2655, cp013480_pro_3035, cp013480_pro_4223, cp013480_pro_4440	PNO31109_01071, PNO31109_03490, PNO31109_03651, PNO31109_04183	cp011253_pro_1905, cp011253_pro_1981, cp011253_pro_3712, cp011253_pro_3918, cp011518_pro_371, cp011519_pro_114, cp011520_pro_29	PPN31114_01199, PPN31114_01286, PPN31114_03320, PPN31114_03601, PPN31114_03970, PPN31114_03972	cp006900_pro_1608, cp006900_pro_2331, cp006900_pro_548, cp006900_pro_729
OG0000001	NA	PAN31117_00611, PAN31117_05067, PAN31117_05082, PAN31117_05089, PAN31117_05091, PAN31117_05096, PAN31117_05246	PAN31108_01790, PAN31108_03708, PAN31108_03720, PAN31108_04688, PAN31108_04700	cp011501_pro_1136, cp011501_pro_3126	cp013481_pro_3548, cp013481_pro_441	cp014018_pro_465	PAP18089_00064, PAP18089_00065, PAP18089_02408, PAP18089_02649, PAP18089_04951, PAP18089_05342	rhsh01000043_pro_10	rhsg01000032_pro_10	rwhx01000019_pro_16	pyya01000026_pro_16	NA	rzmu01000022_pro_16	rwhw01000014_pro_16, rwhw01000129_pro_4	nbta01000003_pro_30, nbta01000005_pro_67, nbta01000005_pro_70, nbta01000009_pro_243	NA	rzmv01000025_pro_47	rqxy01000047_pro_16	rser01000028_pro_57	rrcr01000048_pro_16	rwhv01000019_pro_15	cp011279_pro_1490, cp011279_pro_4203	cp010518_pro_1489, cp010518_pro_4188	NA	PBR20603_03806, PBR20603_04484, PBR20603_04508, PBR20603_04521, PBR20603_04788	maos01000056_pro_43, maos01000061_pro_33	PCA20602_00890, PCA20602_05116	PCA31118_01161, PCA31118_01655, PCA31118_02252, PCA31118_04145, PCA31118_05073, PCA31118_05076, PCA31118_05370, PCA31118_05406	B6_03238, B6_04589, B6_04590	PCE31106_01315, PCE31106_04323, PCE31106_04373, PCE31106_04428, PCE31106_04790, PCE31106_04792	PCE31107_03487, PCE31107_04687, PCE31107_04688	PCO31010_04115, PCO31010_05374	PCO31110_02134, PCO31110_02662, PCO31110_04110, PCO31110_04164, PCO31110_04513, PCO31110_04701	PCO31111_04598, PCO31111_05118, PCO31111_05124, PCO31111_05128	kb944423_pro_252, kb944427_pro_1, kb944433_pro_13, kb944434_pro_109, kb944434_pro_131, kb944434_pro_154, kb944446_pro_32, kb944454_pro_1001, kb944454_pro_1005, kb944459_pro_89	PEP31012_00074, PEP31012_01774, PEP31012_02529, PEP31012_02831	cp011807_pro_2836, cp011807_pro_2842, cp011807_pro_879, cp011807_pro_898, cp011807_pro_899, cp011808_pro_17, cp011808_pro_64	jtcr01000021_pro_4	jtcs01000017_pro_136	PFI31113_03127, PFI31113_03148, PFI31113_04798, PFI31113_04808, PFI31113_04881	PHO31112_00561, PHO31112_00730, PHO31112_01194, PHO31112_01709, PHO31112_02220, PHO31112_02616, PHO31112_02974, PHO31112_03220, PHO31112_03283, PHO31112_03766, PHO31112_04049, PHO31112_04056, PHO31112_04161, PHO31112_04162, PHO31112_04412, PHO31112_04717, PHO31112_04731, PHO31112_04745, PHO31112_04929, PHO31112_04935, PHO31112_05294, PHO31112_05316, PHO31112_05333, PHO31112_05374, PHO31112_05376,…	PIN31009_05304, PIN31009_05309, PIN31009_05311, PIN31009_05318, PIN31009_05333, PIN31009_05483	PIN31115_04400, PIN31115_04444	PMO31116_00719, PMO31116_02002, PMO31116_02656, PMO31116_02873, PMO31116_03492, PMO31116_04169, PMO31116_04651, PMO31116_04743	cp013480_pro_499	NA	cp011253_pro_1894, cp011253_pro_2898, cp011253_pro_3071, cp011253_pro_3081, cp011253_pro_3143, cp011253_pro_3827, cp011253_pro_4686, cp011253_pro_614, cp011253_pro_924, cp011253_pro_928, cp011253_pro_940, cp011518_pro_212, cp011518_pro_246, cp011518_pro_271, cp011518_pro_329, cp011519_pro_2, cp011520_pro_33	PPN31114_01701, PPN31114_03961	cp006900_pro_1291, cp006900_pro_1298, cp006900_pro_1301, cp006900_pro_133, cp006900_pro_2, cp006900_pro_246, cp006900_pro_304, cp006900_pro_3180, cp006900_pro_3182, cp006900_pro_3236, cp006900_pro_4011, cp006900_pro_848, cp006900_pro_880, cp006900_pro_897
OG0000002	NA	PAN31117_00612, PAN31117_02542, PAN31117_05068, PAN31117_05081, PAN31117_05088, PAN31117_05090, PAN31117_05097	PAN31108_03721, PAN31108_04699, PAN31108_04701, PAN31108_05233, PAN31108_05235	cp011501_pro_3125	cp013481_pro_3549, cp013481_pro_442	cp014018_pro_3245	PAP18089_02648, PAP18089_04950, PAP18089_05341	rhsh01000012_pro_117, rhsh01000012_pro_118, rhsh01000033_pro_47, rhsh01000035_pro_3, rhsh01000046_pro_10	rhsg01000001_pro_3, rhsg01000014_pro_117, rhsg01000014_pro_118, rhsg01000025_pro_47	rwhx01000019_pro_15	pyya01000026_pro_15	NA	rzmu01000022_pro_15	rwhw01000014_pro_15, rwhw01000129_pro_5, rwhw01000160_pro_1	nbta01000003_pro_29, nbta01000005_pro_68, nbta01000005_pro_69, nbta01000005_pro_71	rses01000079_pro_2	rzmv01000025_pro_46	rqxy01000019_pro_76, rqxy01000047_pro_15	rser01000028_pro_58	rrcr01000016_pro_19, rrcr01000048_pro_15	rwhv01000019_pro_14	cp011279_pro_1489	cp010518_pro_1488	NA	PBR20603_01596, PBR20603_02323, PBR20603_04482, PBR20603_04506, PBR20603_04520, PBR20603_04825	maos01000061_pro_32	PCA20602_04706, PCA20602_05118, PCA20602_05119	PCA31118_01162, PCA31118_01656, PCA31118_01684, PCA31118_02253, PCA31118_02254, PCA31118_04144, PCA31118_05074, PCA31118_05075, PCA31118_05387, PCA31118_05407	B6_00528, B6_03237, B6_04541, B6_04588, B6_04629	PCE31106_00882, PCE31106_02668, PCE31106_03566, PCE31106_04374, PCE31106_04429, PCE31106_04649, PCE31106_04789	PCE31107_02785, PCE31107_03294, PCE31107_03486, PCE31107_04686	PCO31010_04114, PCO31010_05375	PCO31110_00052, PCO31110_04163, PCO31110_04511, PCO31110_04512	PCO31111_02060, PCO31111_05006, PCO31111_05119, PCO31111_05120, PCO31111_05127, PCO31111_05133	kb944423_pro_546, kb944426_pro_1, kb944433_pro_17, kb944434_pro_130, kb944434_pro_150, kb944434_pro_153, kb944442_pro_1, kb944450_pro_7	PEP31012_00075, PEP31012_01773, PEP31012_01824	cp011807_pro_2837, cp011807_pro_897, cp011808_pro_285, cp011808_pro_65	jtcr01000021_pro_5, jtcr01000025_pro_50	jtcs01000017_pro_135, jtcs01000029_pro_27	PFI31113_03128, PFI31113_03129, PFI31113_03147, PFI31113_04797, PFI31113_04826, PFI31113_04880, PFI31113_04916	PHO31112_00556, PHO31112_00731, PHO31112_01195, PHO31112_02614, PHO31112_02852, PHO31112_03221, PHO31112_03259, PHO31112_03288, PHO31112_03767, PHO31112_03922, PHO31112_04043, PHO31112_04050, PHO31112_04411, PHO31112_04718, PHO31112_04744, PHO31112_04934, PHO31112_05289, PHO31112_05291, PHO31112_05317, PHO31112_05334, PHO31112_05345, PHO31112_05372, PHO31112_05375, PHO31112_05423, PHO31112_05439,…	PIN31009_05303, PIN31009_05310, PIN31009_05312, PIN31009_05319, PIN31009_05332	PIN31115_04401, PIN31115_04436, PIN31115_04465	PMO31116_00718, PMO31116_02003, PMO31116_02871, PMO31116_02872, PMO31116_03491, PMO31116_04168	cp013480_pro_498	NA	cp011253_pro_1893, cp011253_pro_2897, cp011253_pro_3072, cp011253_pro_3080, cp011253_pro_3144, cp011253_pro_3826, cp011253_pro_4302, cp011253_pro_4687, cp011253_pro_613, cp011253_pro_925, cp011253_pro_927, cp011253_pro_941, cp011518_pro_211, cp011518_pro_245, cp011518_pro_272, cp011518_pro_425, cp011519_pro_1, cp011520_pro_32	PPN31114_01699, PPN31114_01700	cp006900_pro_1, cp006900_pro_1290, cp006900_pro_1299, cp006900_pro_1300, cp006900_pro_132, cp006900_pro_245, cp006900_pro_3181, cp006900_pro_879, cp006900_pro_896
OG0000003	NA	PAN31117_02852, PAN31117_05425	PAN31108_04221, PAN31108_05244, PAN31108_05245	cp011501_pro_1139, cp011501_pro_3628, cp011501_pro_994	cp013481_pro_2841	cp014018_pro_3686, cp014018_pro_4618	PAP18089_02410, PAP18089_03259, PAP18089_03517, PAP18089_04944, PAP18089_05228	rhsh01000018_pro_33, rhsh01000035_pro_1, rhsh01000045_pro_4, rhsh01000048_pro_10, rhsh01000052_pro_3	rhsg01000001_pro_1, rhsg01000017_pro_33, rhsg01000027_pro_1, rhsg01000030_pro_10, rhsg01000042_pro_1	rwhx01000013_pro_5, rwhx01000111_pro_1, rwhx01000116_pro_1	pyya01000001_pro_71, pyya01000009_pro_38, pyya01000017_pro_1, pyya01000078_pro_1, pyya01000091_pro_1	rzmt01000014_pro_97, rzmt01000015_pro_6, rzmt01000086_pro_1, rzmt01000091_pro_1, rzmt01000102_pro_1	rzmu01000015_pro_6, rzmu01000089_pro_1	rwhw01000006_pro_5, rwhw01000094_pro_1, rwhw01000123_pro_5, rwhw01000139_pro_1, rwhw01000162_pro_1	nbta01000005_pro_76	rses01000007_pro_24, rses01000134_pro_1	rzmv01000008_pro_39, rzmv01000096_pro_1	rqxy01000006_pro_24, rqxy01000116_pro_1	rser01000013_pro_84, rser01000106_pro_1, rser01000117_pro_1	rrcr01000004_pro_84, rrcr01000063_pro_1, rrcr01000106_pro_1, rrcr01000115_pro_2, rrcr01000124_pro_1	rwhv01000003_pro_57, rwhv01000119_pro_1, rwhv01000128_pro_1	cp011279_pro_1992, cp011279_pro_4062, cp011279_pro_4206	cp010518_pro_1991, cp010518_pro_4046, cp010518_pro_4191	PAQ31011_04849	PBR20603_03241, PBR20603_03613	NA	PCA20602_01449, PCA20602_03506	PCA31118_04306	B6_03552, B6_04609	PCE31106_01307, PCE31106_02569, PCE31106_03783, PCE31106_04783, PCE31106_04786	PCE31107_02739, PCE31107_03042, PCE31107_03484, PCE31107_04279, PCE31107_04280, PCE31107_04685	PCO31010_05373	PCO31110_00060, PCO31110_04161, PCO31110_04166	PCO31111_01054, PCO31111_02422, PCO31111_03756, PCO31111_04986	kb944427_pro_17, kb944428_pro_105, kb944434_pro_140, kb944434_pro_142, kb944442_pro_11, kb944443_pro_117, kb944446_pro_1, kb944454_pro_1008, kb944455_pro_132	PEP31012_00067, PEP31012_00076, PEP31012_00077, PEP31012_00107, PEP31012_00804	cp011808_pro_126, cp011808_pro_143, cp011808_pro_150, cp011808_pro_170, cp011808_pro_18, cp011808_pro_225, cp011808_pro_229, cp011808_pro_263, cp011808_pro_290, cp011808_pro_300, cp011808_pro_302, cp011808_pro_90	NA	NA	PFI31113_02525, PFI31113_03069, PFI31113_03139, PFI31113_03382, PFI31113_04883, PFI31113_04943, PFI31113_05002	PHO31112_01047, PHO31112_01048, PHO31112_02131	NA	PIN31115_04441, PIN31115_04467	PMO31116_00720	NA	NA	cp011253_pro_3084, cp011253_pro_3089, cp011253_pro_4178, cp011518_pro_172, cp011518_pro_180, cp011518_pro_240, cp011518_pro_250, cp011518_pro_263, cp011518_pro_280, cp011518_pro_285, cp011518_pro_96, cp011519_pro_104, cp011519_pro_52, cp011519_pro_63, cp011519_pro_68, cp011520_pro_34, cp011520_pro_50, cp011520_pro_58	NA	cp006900_pro_1285, cp006900_pro_1294, cp006900_pro_130, cp006900_pro_3237, cp006900_pro_493, cp006900_pro_877
OG0000004	muhy01000001_pro_619	PAN31117_00104, PAN31117_01144, PAN31117_05190	PAN31108_00017, PAN31108_00795, PAN31108_03214, PAN31108_04306, PAN31108_04395, PAN31108_04958	cp011501_pro_3298, cp011501_pro_3485, cp011501_pro_4401, cp011501_pro_553	cp013481_pro_1505, cp013481_pro_1702, cp013481_pro_4495, cp013481_pro_590	cp014018_pro_145, cp014018_pro_3683, cp014018_pro_3915, cp014018_pro_958	PAP18089_00576, PAP18089_02848, PAP18089_03413, PAP18089_04572, PAP18089_05060	rhsh01000003_pro_163, rhsh01000005_pro_208, rhsh01000008_pro_168, rhsh01000015_pro_87, rhsh01000045_pro_2	rhsg01000006_pro_162, rhsg01000007_pro_209, rhsg01000009_pro_169, rhsg01000012_pro_125, rhsg01000015_pro_87	rwhx01000004_pro_65, rwhx01000012_pro_3, rwhx01000038_pro_16, rwhx01000044_pro_37, rwhx01000049_pro_6	pyya01000002_pro_149, pyya01000016_pro_3, pyya01000018_pro_100, pyya01000035_pro_49	rzmt01000003_pro_162, rzmt01000007_pro_121, rzmt01000013_pro_3, rzmt01000018_pro_6, rzmt01000037_pro_32	rzmu01000003_pro_162, rzmu01000007_pro_106, rzmu01000007_pro_32, rzmu01000016_pro_99, rzmu01000019_pro_90, rzmu01000066_pro_3	rwhw01000003_pro_85, rwhw01000026_pro_49, rwhw01000048_pro_37, rwhw01000084_pro_3	nbta01000004_pro_79, nbta01000008_pro_147, nbta01000013_pro_122, nbta01000017_pro_159, nbta01000023_pro_43	rses01000003_pro_11, rses01000016_pro_6, rses01000038_pro_16, rses01000048_pro_37, rses01000081_pro_3	rzmv01000001_pro_148, rzmv01000007_pro_47, rzmv01000028_pro_32, rzmv01000047_pro_29, rzmv01000064_pro_3	rqxy01000002_pro_11, rqxy01000015_pro_99, rqxy01000040_pro_32, rqxy01000051_pro_29, rqxy01000078_pro_4	rser01000001_pro_162, rser01000015_pro_3, rser01000017_pro_86, rser01000024_pro_71, rser01000039_pro_16	rrcr01000001_pro_162, rrcr01000015_pro_90, rrcr01000033_pro_3, rrcr01000041_pro_32, rrcr01000047_pro_37	rwhv01000001_pro_73, rwhv01000054_pro_29, rwhv01000082_pro_16, rwhv01000090_pro_3	cp011279_pro_1662, cp011279_pro_1849, cp011279_pro_2764, cp011279_pro_3620	cp010518_pro_1661, cp010518_pro_1848, cp010518_pro_2765, cp010518_pro_3603	PAQ31011_01478, PAQ31011_02195, PAQ31011_04823	PBR20603_00504, PBR20603_02801, PBR20603_03648, PBR20603_04349	maos01000021_pro_6, maos01000030_pro_76, maos01000061_pro_72	PCA20602_00720, PCA20602_01759, PCA20602_04665	PCA31118_00088, PCA31118_01483, PCA31118_05303	B6_03195	PCE31106_02905, PCE31106_03697	PCE31107_00984	PCO31010_01232, PCO31010_01898, PCO31010_05045	PCO31110_02945, PCO31110_03786	PCO31111_03173, PCO31111_03348	kb944431_pro_176, kb944457_pro_391	PEP31012_00792, PEP31012_04488	cp011807_pro_2852, cp011807_pro_295, cp011807_pro_3898, cp011807_pro_869	jtcr01000013_pro_44, jtcr01000018_pro_137, jtcr01000057_pro_23	jtcs01000016_pro_137, jtcs01000025_pro_229, jtcs01000041_pro_6	PFI31113_02316, PFI31113_02752, PFI31113_03574, PFI31113_04799	PHO31112_01715, PHO31112_04235, PHO31112_04501	PIN31009_00432, PIN31009_03314, PIN31009_04513	PIN31115_00608, PIN31115_02835, PIN31115_03055, PIN31115_04696	PMO31116_01994	cp013480_pro_1504, cp013480_pro_318, cp013480_pro_4708	PNO31109_00498, PNO31109_01834, PNO31109_03552, PNO31109_04001	cp011253_pro_302, cp011253_pro_3152, cp011253_pro_4172	PPN31114_02440, PPN31114_03889, PPN31114_04150	cp006900_pro_251
OG0000005	NA	PAN31117_02469, PAN31117_02472, PAN31117_02539, PAN31117_04179, PAN31117_05122	NA	cp011501_pro_1187, cp011501_pro_1576, cp011501_pro_1579, cp011501_pro_3300, cp011501_pro_3304	cp013481_pro_1694, cp013481_pro_1698, cp013481_pro_3428, cp013481_pro_3430, cp013481_pro_3433, cp013481_pro_3872	cp014018_pro_1584, cp014018_pro_2006, cp014018_pro_2009, cp014018_pro_2011	PAP18089_04762, PAP18089_04898, PAP18089_05050, PAP18089_05055, PAP18089_05330, PAP18089_05332	rhsh01000012_pro_3, rhsh01000025_pro_3, rhsh01000040_pro_2, rhsh01000040_pro_6, rhsh01000044_pro_3, rhsh01000044_pro_5	rhsg01000014_pro_3, rhsg01000021_pro_3, rhsg01000029_pro_2, rhsg01000029_pro_6, rhsg01000033_pro_3, rhsg01000033_pro_5	rwhx01000036_pro_2, rwhx01000036_pro_6, rwhx01000056_pro_26, rwhx01000078_pro_6, rwhx01000079_pro_2, rwhx01000079_pro_4	pyya01000011_pro_3, pyya01000037_pro_2, pyya01000037_pro_6, pyya01000049_pro_3, pyya01000059_pro_2, pyya01000059_pro_4	rzmt01000035_pro_2, rzmt01000035_pro_6, rzmt01000040_pro_2, rzmt01000047_pro_3, rzmt01000060_pro_2, rzmt01000060_pro_4	rzmu01000010_pro_3, rzmu01000037_pro_2, rzmu01000037_pro_6, rzmu01000047_pro_3, rzmu01000067_pro_2, rzmu01000067_pro_4	rwhw01000043_pro_2, rwhw01000043_pro_6, rwhw01000059_pro_26, rwhw01000074_pro_3, rwhw01000089_pro_2, rwhw01000089_pro_4	nbta01000005_pro_122, nbta01000014_pro_221, nbta01000014_pro_224, nbta01000014_pro_226, nbta01000017_pro_163, nbta01000017_pro_168	rses01000032_pro_3, rses01000043_pro_3, rses01000043_pro_7, rses01000083_pro_3, rses01000085_pro_2, rses01000085_pro_4	rzmv01000030_pro_3, rzmv01000042_pro_2, rzmv01000042_pro_6, rzmv01000059_pro_6, rzmv01000068_pro_2, rzmv01000068_pro_4	rqxy01000007_pro_3, rqxy01000043_pro_2, rqxy01000043_pro_6, rqxy01000080_pro_6, rqxy01000081_pro_2, rqxy01000081_pro_4	rser01000031_pro_3, rser01000041_pro_2, rser01000041_pro_6, rser01000053_pro_19, rser01000071_pro_2, rser01000071_pro_4	rrcr01000011_pro_3, rrcr01000044_pro_2, rrcr01000044_pro_7, rrcr01000056_pro_19, rrcr01000072_pro_2, rrcr01000072_pro_4	rwhv01000034_pro_4, rwhv01000045_pro_2, rwhv01000045_pro_7, rwhv01000077_pro_6, rwhv01000085_pro_2, rwhv01000085_pro_4	cp011279_pro_1664, cp011279_pro_1668, cp011279_pro_4631, cp011279_pro_4634	cp010518_pro_1663, cp010518_pro_1667, cp010518_pro_4616, cp010518_pro_4619	PAQ31011_02187, PAQ31011_03879, PAQ31011_03943, PAQ31011_03947	PBR20603_03180, PBR20603_03183, PBR20603_04354, PBR20603_04701	maos01000025_pro_3, maos01000050_pro_80, maos01000050_pro_83	PCA20602_04845	NA	NA	NA	NA	PCO31010_03928, PCO31010_04026, PCO31010_05143	PCO31110_02117, PCO31110_02124, PCO31110_04817, PCO31110_05099, PCO31110_05118	PCO31111_02369, PCO31111_04609, PCO31111_05061	kb944426_pro_239, kb944429_pro_3, kb944430_pro_3, kb944433_pro_3, kb944458_pro_57	NA	NA	jtcr01000002_pro_95, jtcr01000002_pro_97, jtcr01000007_pro_32	jtcs01000002_pro_3, jtcs01000013_pro_95, jtcs01000013_pro_97	PFI31113_02673, PFI31113_02676, PFI31113_04906	PHO31112_02694, PHO31112_02697, PHO31112_04230, PHO31112_05202	PIN31009_00985, PIN31009_01161, PIN31009_02967, PIN31009_02969	PIN31115_01178, PIN31115_01352, PIN31115_02564, PIN31115_02566	NA	cp013480_pro_1049, cp013480_pro_1911, cp013480_pro_1913, cp013480_pro_1917, cp013480_pro_3769, cp013480_pro_875	PNO31109_02953, PNO31109_02955	NA	NA	NA
OG0000006	NA	PAN31117_03372, PAN31117_05296	PAN31108_01038, PAN31108_03831	cp011501_pro_340, cp011501_pro_3675, cp011501_pro_4631	cp013481_pro_1332, cp013481_pro_286, cp013481_pro_4713	cp014018_pro_379, cp014018_pro_4092, cp014018_pro_737	PAP18089_00354, PAP18089_02668, PAP18089_03713	rhsh01000003_pro_338, rhsh01000027_pro_26, rhsh01000036_pro_19	rhsg01000005_pro_331, rhsg01000006_pro_337, rhsg01000011_pro_26	rwhx01000035_pro_37, rwhx01000050_pro_24, rwhx01000054_pro_30	pyya01000020_pro_73, pyya01000030_pro_55, pyya01000042_pro_10	rzmt01000002_pro_203, rzmt01000034_pro_50, rzmt01000041_pro_24	rzmu01000030_pro_11, rzmu01000046_pro_30, rzmu01000048_pro_24	rwhw01000004_pro_100, rwhw01000030_pro_8, rwhw01000061_pro_24	nbta01000001_pro_11, nbta01000003_pro_49, nbta01000009_pro_155	rses01000036_pro_37, rses01000057_pro_24, rses01000066_pro_8	rzmv01000019_pro_72, rzmv01000024_pro_76, rzmv01000048_pro_24	rqxy01000036_pro_54, rqxy01000042_pro_31, rqxy01000052_pro_24	rser01000018_pro_71, rser01000049_pro_8, rser01000054_pro_24	rrcr01000040_pro_48, rrcr01000043_pro_11, rrcr01000052_pro_24	rwhv01000036_pro_11, rwhv01000055_pro_24, rwhv01000057_pro_8	cp011279_pro_2039, cp011279_pro_2994, cp011279_pro_3406	cp010518_pro_2038, cp010518_pro_2996, cp010518_pro_3389	PAQ31011_01239, PAQ31011_04964	PBR20603_00731, PBR20603_02641, PBR20603_03964	maos01000002_pro_25, maos01000055_pro_26	PCA20602_01491, PCA20602_03756	PCA31118_01219, PCA31118_04174	B6_00409, B6_01937	PCE31106_00014, PCE31106_02184	PCE31107_00176, PCE31107_03498	PCO31010_01627, PCO31010_05301	PCO31110_03625, PCO31110_04331	PCO31111_03197, PCO31111_04147	kb944431_pro_18, kb944455_pro_21	PEP31012_01599, PEP31012_03167	cp011807_pro_41, cp011807_pro_4144	jtcr01000045_pro_41	jtcs01000039_pro_25	PFI31113_02976, PFI31113_04221, PFI31113_04359	PHO31112_03091, PHO31112_04432	PIN31009_00185, PIN31009_04490, PIN31009_05519	PIN31115_00393, PIN31115_03453, PIN31115_05496	PMO31116_01547, PMO31116_02305, PMO31116_03774	cp013480_pro_1069, cp013480_pro_4942, cp013480_pro_99	PNO31109_01956, PNO31109_04225	cp011253_pro_23, cp011253_pro_4418	PPN31114_02202, PPN31114_04536, PPN31114_05245	cp006900_pro_26, cp006900_pro_3978, cp006900_pro_973
OG0000007	NA	PAN31117_00464, PAN31117_03984	PAN31108_03144, PAN31108_03185, PAN31108_03261, PAN31108_03530, PAN31108_04244, PAN31108_05164	cp011501_pro_1039, cp011501_pro_866	cp013481_pro_4018, cp013481_pro_4174	cp014018_pro_1278, cp014018_pro_1432	PAP18089_00902, PAP18089_01058	rhsh01000002_pro_286, rhsh01000002_pro_440	rhsg01000003_pro_287, rhsg01000003_pro_441	rwhx01000028_pro_30, rwhx01000029_pro_11	pyya01000007_pro_10, pyya01000032_pro_30	rzmt01000005_pro_141, rzmt01000030_pro_52	rzmu01000005_pro_141, rzmu01000025_pro_53	rwhw01000018_pro_30, rwhw01000021_pro_10	nbta01000008_pro_468, nbta01000021_pro_147	rses01000020_pro_30, rses01000031_pro_10	rzmv01000005_pro_30, rzmv01000031_pro_53	rqxy01000027_pro_30, rqxy01000030_pro_10	rser01000033_pro_30, rser01000058_pro_18	rrcr01000030_pro_53, rrcr01000034_pro_28	rwhv01000025_pro_53, rwhv01000026_pro_29	cp011279_pro_3934, cp011279_pro_4107	cp010518_pro_3917, cp010518_pro_4091	PAQ31011_01869, PAQ31011_02050	PBR20603_00030, PBR20603_00185	maos01000001_pro_233, maos01000001_pro_29, maos01000036_pro_1, maos01000061_pro_127, maos01000073_pro_2	PCA20602_03186, PCA20602_04950	PCA31118_01894, PCA31118_02083	B6_00462, B6_00692, B6_04194	PCE31106_00604, PCE31106_00783	PCE31107_00142, PCE31107_00716, PCE31107_00878	PCO31010_03626, PCO31010_03803	PCO31110_00185, PCO31110_00355, PCO31110_03563	PCO31111_00029, PCO31111_00190	kb944452_pro_47, kb944454_pro_179, kb944454_pro_357	PEP31012_00974, PEP31012_01108	cp011807_pro_624, cp011807_pro_773	jtcr01000011_pro_33, jtcr01000028_pro_38, jtcr01000036_pro_30	jtcs01000008_pro_33, jtcs01000020_pro_8, jtcs01000023_pro_38	PFI31113_01350, PFI31113_01517	PHO31112_02067, PHO31112_02249	PIN31009_00843, PIN31009_01035, PIN31009_01615, PIN31009_02988	PIN31115_01013, PIN31115_01228, PIN31115_01797, PIN31115_02585	PMO31116_00849, PMO31116_00990	cp013480_pro_3600, cp013480_pro_736, cp013480_pro_922	PNO31109_00028, PNO31109_02917	cp011253_pro_828	PPN31114_02815, PPN31114_03011, PPN31114_04972	cp006900_pro_3318, cp006900_pro_3459
OG0000008	NA	PAN31117_02470, PAN31117_02541, PAN31117_04180, PAN31117_05123	NA	cp011501_pro_1188, cp011501_pro_1577, cp011501_pro_1580, cp011501_pro_3303	cp013481_pro_1695, cp013481_pro_1699, cp013481_pro_3427, cp013481_pro_3432, cp013481_pro_3871	cp014018_pro_1585, cp014018_pro_2007, cp014018_pro_2012	PAP18089_04761, PAP18089_04897, PAP18089_05052, PAP18089_05057, PAP18089_05333	rhsh01000012_pro_2, rhsh01000025_pro_2, rhsh01000040_pro_1, rhsh01000040_pro_5, rhsh01000044_pro_2	rhsg01000014_pro_2, rhsg01000021_pro_2, rhsg01000029_pro_1, rhsg01000029_pro_5, rhsg01000033_pro_2	rwhx01000036_pro_1, rwhx01000036_pro_5, rwhx01000056_pro_27, rwhx01000078_pro_7, rwhx01000079_pro_5	pyya01000011_pro_2, pyya01000037_pro_1, pyya01000037_pro_5, pyya01000049_pro_2, pyya01000059_pro_5	rzmt01000035_pro_1, rzmt01000035_pro_5, rzmt01000040_pro_1, rzmt01000047_pro_2, rzmt01000060_pro_5	rzmu01000010_pro_2, rzmu01000037_pro_1, rzmu01000037_pro_5, rzmu01000047_pro_2, rzmu01000067_pro_5	rwhw01000043_pro_1, rwhw01000043_pro_5, rwhw01000059_pro_27, rwhw01000074_pro_2, rwhw01000089_pro_5	nbta01000005_pro_123, nbta01000014_pro_222, nbta01000014_pro_227, nbta01000017_pro_162, nbta01000017_pro_167	rses01000032_pro_2, rses01000043_pro_2, rses01000043_pro_6, rses01000083_pro_2, rses01000085_pro_5	rzmv01000030_pro_2, rzmv01000042_pro_1, rzmv01000042_pro_5, rzmv01000059_pro_7, rzmv01000068_pro_5	rqxy01000007_pro_2, rqxy01000043_pro_1, rqxy01000043_pro_5, rqxy01000080_pro_7, rqxy01000081_pro_5	rser01000031_pro_2, rser01000041_pro_1, rser01000041_pro_5, rser01000053_pro_20, rser01000071_pro_5	rrcr01000011_pro_2, rrcr01000044_pro_1, rrcr01000044_pro_6, rrcr01000056_pro_20, rrcr01000072_pro_5	rwhv01000034_pro_2, rwhv01000034_pro_3, rwhv01000045_pro_1, rwhv01000045_pro_6, rwhv01000077_pro_7, rwhv01000085_pro_5	cp011279_pro_1667, cp011279_pro_4632, cp011279_pro_4635	cp010518_pro_1666, cp010518_pro_4617, cp010518_pro_4620	PAQ31011_02188, PAQ31011_03877, PAQ31011_03946	PBR20603_03181, PBR20603_04353, PBR20603_04700	maos01000025_pro_2, maos01000050_pro_82	PCA20602_04844	PCA31118_00890	NA	NA	NA	PCO31010_03926, PCO31010_05142	PCO31110_02115, PCO31110_02122, PCO31110_04818, PCO31110_05119	PCO31111_04611, PCO31111_05060	kb944426_pro_238, kb944429_pro_2, kb944430_pro_2, kb944433_pro_2	NA	NA	jtcr01000002_pro_96, jtcr01000007_pro_33	jtcs01000002_pro_2, jtcs01000013_pro_96	PFI31113_02674, PFI31113_04907	PHO31112_02696, PHO31112_04232, PHO31112_05201	PIN31009_00987, PIN31009_01162, PIN31009_02966	PIN31115_01180, PIN31115_01353, PIN31115_02563	NA	cp013480_pro_1050, cp013480_pro_1914, cp013480_pro_1918, cp013480_pro_3768, cp013480_pro_876	PNO31109_02952	cp011253_pro_1395	NA	NA
OG0000009	NA	PAN31117_00675, PAN31117_05166	NA	cp011501_pro_1532, cp011501_pro_1550, cp011501_pro_2636, cp011501_pro_3703	cp013481_pro_1304, cp013481_pro_2632, cp013481_pro_3461, cp013481_pro_3479	cp014018_pro_1960, cp014018_pro_1978, cp014018_pro_3039, cp014018_pro_4120	PAP18089_02221, PAP18089_04719, PAP18089_04791, PAP18089_04808	rhsh01000001_pro_168, rhsh01000012_pro_31, rhsh01000012_pro_49, rhsh01000042_pro_8	rhsg01000001_pro_208, rhsg01000014_pro_31, rhsg01000014_pro_49, rhsg01000031_pro_10	rwhx01000002_pro_115, rwhx01000018_pro_61, rwhx01000061_pro_10, rwhx01000087_pro_3	pyya01000004_pro_117, pyya01000011_pro_31, pyya01000011_pro_49, pyya01000048_pro_10	rzmt01000006_pro_50, rzmt01000023_pro_9, rzmt01000040_pro_30, rzmt01000050_pro_10	rzmu01000002_pro_149, rzmu01000010_pro_31, rzmu01000010_pro_48, rzmu01000051_pro_10	rwhw01000001_pro_113, rwhw01000060_pro_20, rwhw01000060_pro_3, rwhw01000062_pro_10	nbta01000003_pro_19, nbta01000014_pro_175, nbta01000014_pro_193, nbta01000023_pro_185	rses01000004_pro_45, rses01000032_pro_30, rses01000032_pro_47, rses01000059_pro_19	rzmv01000003_pro_111, rzmv01000030_pro_30, rzmv01000030_pro_47, rzmv01000051_pro_19	rqxy01000007_pro_31, rqxy01000007_pro_48, rqxy01000016_pro_39, rqxy01000061_pro_19	rser01000002_pro_111, rser01000031_pro_29, rser01000031_pro_45, rser01000055_pro_8	rrcr01000002_pro_149, rrcr01000011_pro_31, rrcr01000011_pro_48, rrcr01000058_pro_10	rwhv01000004_pro_113, rwhv01000034_pro_48, rwhv01000062_pro_19	cp011279_pro_1000, cp011279_pro_2067, cp011279_pro_4587, cp011279_pro_4605	cp010518_pro_1000, cp010518_pro_2066, cp010518_pro_4572, cp010518_pro_4590	PAQ31011_00404, PAQ31011_04809	PBR20603_03151	maos01000034_pro_85	PCA20602_01050	PCA31118_00746	B6_00167	PCE31106_01322	PCE31107_02036	PCO31010_00414, PCO31010_01258	PCO31110_00028, PCO31110_01824, PCO31110_04789	PCO31111_02402, PCO31111_04975	kb944429_pro_45, kb944454_pro_34	PEP31012_03878	cp011807_pro_2247	jtcr01000002_pro_76, jtcr01000004_pro_136, jtcr01000050_pro_2	jtcs01000003_pro_42, jtcs01000013_pro_76, jtcs01000048_pro_10	PFI31113_00461, PFI31113_02629, PFI31113_02651, PFI31113_03926	PHO31112_01699, PHO31112_02739	PIN31009_00807, PIN31009_02669	PIN31115_00977, PIN31115_03625	PMO31116_00307, PMO31116_04287	cp013480_pro_2163, cp013480_pro_699	NA	cp011253_pro_2469	PPN31114_00550, PPN31114_02791, PPN31114_02839	cp006900_pro_1311, cp006900_pro_1888, cp006900_pro_949
OG0000010	muhy01000001_pro_523	PAN31117_03231, PAN31117_04015	PAN31108_03559, PAN31108_03560, PAN31108_05135	cp011501_pro_1068, cp011501_pro_1691	cp013481_pro_3313, cp013481_pro_3989	cp014018_pro_1461, cp014018_pro_2125	PAP18089_01088, PAP18089_05255	rhsh01000002_pro_469, rhsh01000028_pro_63	rhsg01000002_pro_1, rhsg01000003_pro_470	rwhx01000028_pro_59, rwhx01000081_pro_12, rwhx01000122_pro_1, rwhx01000123_pro_1, rwhx01000126_pro_1	pyya01000001_pro_2, pyya01000032_pro_59, pyya01000088_pro_1, pyya01000090_pro_1, pyya01000095_pro_1	rzmt01000005_pro_170, rzmt01000059_pro_2, rzmt01000100_pro_1, rzmt01000101_pro_1, rzmt01000104_pro_1	rzmu01000005_pro_170, rzmu01000068_pro_12, rzmu01000099_pro_1, rzmu01000100_pro_1, rzmu01000102_pro_1	rwhw01000018_pro_59, rwhw01000092_pro_12, rwhw01000156_pro_1, rwhw01000194_pro_1, rwhw01000195_pro_1, rwhw01000202_pro_1	nbta01000005_pro_1, nbta01000015_pro_1, nbta01000021_pro_176	rses01000020_pro_1, rses01000102_pro_4	rzmv01000005_pro_1, rzmv01000045_pro_2	rqxy01000027_pro_59, rqxy01000102_pro_4, rqxy01000129_pro_1, rqxy01000130_pro_1	rser01000033_pro_1, rser01000045_pro_1, rser01000112_pro_2, rser01000123_pro_1, rser01000128_pro_1, rser01000129_pro_1	rrcr01000034_pro_57, rrcr01000087_pro_4	rwhv01000026_pro_58, rwhv01000088_pro_12, rwhv01000123_pro_2, rwhv01000131_pro_1, rwhv01000132_pro_1	cp011279_pro_4136, cp011279_pro_55	cp010518_pro_4120, cp010518_pro_55	PAQ31011_02079, PAQ31011_02966	PBR20603_00001, PBR20603_01520	NA	PCA20602_02843, PCA20602_03215	PCA31118_02113, PCA31118_03442, PCA31118_04708	B6_00580, B6_04224	PCE31106_00813, PCE31106_03489	PCE31107_00907, PCE31107_04488	PCO31010_03854, PCO31010_05246	PCO31110_00152, PCO31110_02219	NA	kb944439_pro_57, kb944454_pro_148	PEP31012_00945, PEP31012_02176	cp011807_pro_1373, cp011807_pro_805	jtcr01000036_pro_2, jtcr01000047_pro_2	jtcs01000020_pro_36, jtcs01000040_pro_2	PFI31113_00765, PFI31113_04986	PHO31112_02035, PHO31112_04852	PIN31009_01063, PIN31009_01701, PIN31009_03476	PIN31115_01256, PIN31115_01883, PIN31115_02888	PMO31116_00819, PMO31116_04072	cp013480_pro_3514, cp013480_pro_950	NA	cp011253_pro_1460, cp011253_pro_857	PPN31114_01791, PPN31114_03039	cp006900_pro_2779, cp006900_pro_3288
OG0000011	muhy01000006_pro_1	NA	PAN31108_03822, PAN31108_03856	cp011501_pro_4622, cp011501_pro_4654	cp013481_pro_263, cp013481_pro_295	cp014018_pro_370, cp014018_pro_402	PAP18089_03688, PAP18089_03722	rhsh01000027_pro_2, rhsh01000027_pro_3, rhsh01000027_pro_35	rhsg01000011_pro_2, rhsg01000011_pro_3, rhsg01000011_pro_35	rwhx01000003_pro_1, rwhx01000050_pro_1, rwhx01000050_pro_33, rwhx01000105_pro_1, rwhx01000119_pro_1	pyya01000014_pro_1, pyya01000042_pro_1, pyya01000042_pro_33, pyya01000070_pro_2, pyya01000086_pro_1	rzmt01000012_pro_1, rzmt01000041_pro_1, rzmt01000041_pro_33, rzmt01000090_pro_1, rzmt01000096_pro_1	rzmu01000014_pro_1, rzmu01000048_pro_1, rzmu01000075_pro_6, rzmu01000082_pro_1, rzmu01000097_pro_1	rwhw01000013_pro_1, rwhw01000061_pro_1, rwhw01000116_pro_6, rwhw01000159_pro_1, rwhw01000180_pro_1, rwhw01000203_pro_1	nbta01000009_pro_146, nbta01000009_pro_178	rses01000012_pro_1, rses01000057_pro_1, rses01000101_pro_1, rses01000121_pro_1, rses01000156_pro_1	rzmv01000013_pro_1, rzmv01000048_pro_1, rzmv01000048_pro_33, rzmv01000090_pro_1, rzmv01000102_pro_1	rqxy01000011_pro_1, rqxy01000052_pro_1, rqxy01000052_pro_33, rqxy01000109_pro_1, rqxy01000127_pro_1	rser01000025_pro_1, rser01000054_pro_1, rser01000082_pro_1, rser01000099_pro_1, rser01000127_pro_1, rser01000131_pro_1	rrcr01000013_pro_1, rrcr01000052_pro_1, rrcr01000052_pro_33, rrcr01000099_pro_2, rrcr01000120_pro_1	rwhv01000010_pro_1, rwhv01000055_pro_1, rwhv01000055_pro_33, rwhv01000112_pro_2, rwhv01000133_pro_1	cp011279_pro_2985, cp011279_pro_3017	cp010518_pro_2987, cp010518_pro_3019	PAQ31011_04938, PAQ31011_04974	PBR20603_03955, PBR20603_03988	NA	PCA20602_03747, PCA20602_03784	PCA31118_04149, PCA31118_04183	B6_00429, B6_04434	PCE31106_02164, PCE31106_02192	PCE31107_03506, PCE31107_04657	PCO31010_04667, PCO31010_05275	PCO31110_04322, PCO31110_04351	PCO31111_04138, PCO31111_04164	kb944455_pro_2, kb944455_pro_30	PEP31012_03147, PEP31012_03176	cp011807_pro_4135, cp011807_pro_4168	jtcr01000045_pro_32, jtcr01000045_pro_64	jtcs01000039_pro_2, jtcs01000039_pro_34	PFI31113_04334, PFI31113_04368	PHO31112_03082, PHO31112_03113	PIN31009_05587	PIN31115_05468, PIN31115_05469	PMO31116_03766, PMO31116_03798	cp013480_pro_4932, cp013480_pro_4966	PNO31109_02686	cp011253_pro_4408, cp011253_pro_4444	PPN31114_05220, PPN31114_05221	cp006900_pro_34, cp006900_pro_4
OG0000012	NA	PAN31117_00708, PAN31117_02021, PAN31117_03178, PAN31117_03370	PAN31108_02070	cp011501_pro_2669, cp011501_pro_338, cp011501_pro_4	cp013481_pro_250, cp013481_pro_2665, cp013481_pro_4715	cp014018_pro_3073, cp014018_pro_407, cp014018_pro_735	PAP18089_00004, PAP18089_00352, PAP18089_04753	rhsh01000001_pro_135, rhsh01000007_pro_4, rhsh01000036_pro_21	rhsg01000001_pro_175, rhsg01000005_pro_329, rhsg01000005_pro_4	rwhx01000002_pro_148, rwhx01000021_pro_66, rwhx01000035_pro_39	pyya01000004_pro_150, pyya01000020_pro_75, pyya01000029_pro_57	rzmt01000002_pro_201, rzmt01000006_pro_83, rzmt01000024_pro_4	rzmu01000002_pro_181, rzmu01000006_pro_4, rzmu01000030_pro_9	rwhw01000001_pro_80, rwhw01000004_pro_98, rwhw01000057_pro_4	nbta01000001_pro_9, nbta01000009_pro_183, nbta01000023_pro_218	rses01000004_pro_78, rses01000024_pro_4, rses01000036_pro_39	rzmv01000003_pro_79, rzmv01000006_pro_4, rzmv01000019_pro_74	rqxy01000021_pro_71, rqxy01000042_pro_33	rser01000002_pro_80, rser01000018_pro_73, rser01000029_pro_55	rrcr01000005_pro_4, rrcr01000043_pro_9	rwhv01000014_pro_80, rwhv01000020_pro_65, rwhv01000036_pro_9	cp011279_pro_1033, cp011279_pro_3022, cp011279_pro_3404	cp010518_pro_1033, cp010518_pro_3024, cp010518_pro_3387	PAQ31011_00439, PAQ31011_01237, PAQ31011_03026, PAQ31011_04564	PBR20603_00733, PBR20603_01562, PBR20603_03058	maos01000002_pro_21, maos01000028_pro_211, maos01000034_pro_51, maos01000049_pro_4	PCA20602_01085, PCA20602_01489, PCA20602_02919, PCA20602_04041	PCA31118_01215, PCA31118_01679, PCA31118_03741, PCA31118_04746	NA	NA	NA	PCO31010_01292, PCO31010_01625, PCO31010_02666, PCO31010_03116	NA	NA	NA	NA	cp011807_pro_2281, cp011807_pro_39	jtcr01000004_pro_166, jtcr01000014_pro_178, jtcr01000026_pro_4, jtcr01000027_pro_96	jtcs01000003_pro_72, jtcs01000011_pro_4, jtcs01000018_pro_96, jtcs01000030_pro_8	PFI31113_00824, PFI31113_02978, PFI31113_03073	PHO31112_02342	PIN31009_00157, PIN31009_01775, PIN31009_02705, PIN31009_05001	PIN31115_00004, PIN31115_00364, PIN31115_01963, PIN31115_03589	PMO31116_04406	cp013480_pro_2125, cp013480_pro_3445, cp013480_pro_4970, cp013480_pro_71	PNO31109_02283	cp011253_pro_1509, cp011253_pro_21, cp011253_pro_2501, cp011253_pro_4462	PPN31114_00512, PPN31114_01733, PPN31114_01853, PPN31114_02177	cp006900_pro_4248
OG0000013	NA	PAN31117_00164, PAN31117_00165, PAN31117_00166	PAN31108_00730, PAN31108_00731, PAN31108_00732, PAN31108_00733, PAN31108_00734	cp011501_pro_609	cp013481_pro_4438	cp014018_pro_1016	PAP18089_00634	rhsh01000002_pro_22	rhsg01000003_pro_22	rwhx01000004_pro_9	pyya01000002_pro_206	rzmt01000003_pro_106	rzmu01000003_pro_106	rwhw01000003_pro_29	nbta01000008_pro_204	rses01000003_pro_67	rzmv01000001_pro_204	rqxy01000002_pro_67	rser01000001_pro_106	rrcr01000001_pro_106	rwhv01000001_pro_17	cp011279_pro_3677	cp010518_pro_3660	PAQ31011_01556, PAQ31011_01557, PAQ31011_01558, PAQ31011_01559	PBR20603_00447, PBR20603_00448, PBR20603_00449	maos01000043_pro_49, maos01000043_pro_51, maos01000043_pro_52, maos01000043_pro_53	PCA20602_01821, PCA20602_01822, PCA20602_01823, PCA20602_01824, PCA20602_01825	PCA31118_01541, PCA31118_01542, PCA31118_01543	NA	PCE31106_00357, PCE31106_00358, PCE31106_00359, PCE31106_00360	PCE31107_00470, PCE31107_00471, PCE31107_00472	PCO31010_01962, PCO31010_01963, PCO31010_01964, PCO31010_01965, PCO31010_01966	PCO31110_00623, PCO31110_00624, PCO31110_00625	PCO31111_00444, PCO31111_00445	kb944454_pro_625, kb944454_pro_626, kb944454_pro_627	PEP31012_01345, PEP31012_01346, PEP31012_01347	cp011807_pro_343, cp011807_pro_344, cp011807_pro_345	jtcr01000029_pro_2, jtcr01000029_pro_4, jtcr01000029_pro_5, jtcr01000029_pro_6, jtcr01000029_pro_7	jtcs01000006_pro_31, jtcs01000006_pro_32, jtcs01000006_pro_33, jtcs01000006_pro_34, jtcs01000006_pro_36	PFI31113_01795, PFI31113_01796, PFI31113_01797, PFI31113_01798, PFI31113_01799	PHO31112_00229, PHO31112_00230, PHO31112_00231, PHO31112_00232	PIN31009_00510, PIN31009_00511, PIN31009_00512	PIN31115_00689, PIN31115_00690	PMO31116_01236, PMO31116_01237	cp013480_pro_395, cp013480_pro_396	NA	cp011253_pro_360, cp011253_pro_361, cp011253_pro_362, cp011253_pro_364	PPN31114_02513, PPN31114_02515, PPN31114_03907	cp006900_pro_3700, cp006900_pro_3701
OG0000014	NA	PAN31117_00292, PAN31117_03588, PAN31117_05352	PAN31108_01243, PAN31108_01244, PAN31108_02954, PAN31108_03896	cp011501_pro_3729	cp013481_pro_1278, cp013481_pro_4314	cp014018_pro_1140, cp014018_pro_4145	PAP18089_00760, PAP18089_02193	rhsh01000002_pro_147, rhsh01000029_pro_56	rhsg01000003_pro_147, rhsg01000023_pro_56	rwhx01000010_pro_97, rwhx01000015_pro_18	pyya01000005_pro_138, pyya01000007_pro_149	rzmt01000008_pro_137, rzmt01000042_pro_18	rzmu01000011_pro_89, rzmu01000018_pro_18	rwhw01000009_pro_18, rwhw01000017_pro_59	nbta01000008_pro_329, nbta01000023_pro_477	rses01000009_pro_7, rses01000015_pro_17	rzmv01000011_pro_89, rzmv01000018_pro_18	rqxy01000008_pro_96, rqxy01000017_pro_18	rser01000016_pro_18, rser01000046_pro_7	rrcr01000012_pro_95, rrcr01000054_pro_18	rwhv01000009_pro_7, rwhv01000013_pro_18	cp011279_pro_2093	cp010518_pro_2092	PAQ31011_01685, PAQ31011_02875, PAQ31011_03692	PBR20603_00322, PBR20603_04442	maos01000026_pro_33, maos01000045_pro_39	PCA20602_00034, PCA20602_01951, PCA20602_02230	PCA31118_01720, PCA31118_04000, PCA31118_04398	B6_00819, B6_02170	PCE31106_00476, PCE31106_01236	PCE31107_00590, PCE31107_01607	PCO31010_02091, PCO31010_02151, PCO31010_04304	PCO31110_00498, PCO31110_03579	PCO31111_00320, PCO31111_01471	kb944452_pro_30, kb944454_pro_498	PEP31012_00026, PEP31012_01227	cp011807_pro_3128, cp011807_pro_3301, cp011807_pro_473	jtcr01000054_pro_11	jtcs01000042_pro_11	PFI31113_01669, PFI31113_03955	PHO31112_00103, PHO31112_01672, PHO31112_03920	PIN31009_00638, PIN31009_04342, PIN31009_05255	PIN31115_00816, PIN31115_03315, PIN31115_04660	PMO31116_01112, PMO31116_02181, PMO31116_04314	cp013480_pro_1257, cp013480_pro_2126, cp013480_pro_4078, cp013480_pro_542	PNO31109_00327, PNO31109_03186	cp011253_pro_3384, cp011253_pro_3575, cp011253_pro_497	PPN31114_00513, PPN31114_02640, PPN31114_03168, PPN31114_04400	cp006900_pro_3594, cp006900_pro_924
OG0000015	NA	PAN31117_00709, PAN31117_02020, PAN31117_03179, PAN31117_03369	PAN31108_01041, PAN31108_02069	cp011501_pro_2670, cp011501_pro_3	cp013481_pro_251, cp013481_pro_2666, cp013481_pro_4716	cp014018_pro_3074, cp014018_pro_406, cp014018_pro_734	PAP18089_00003, PAP18089_00351, PAP18089_04754	rhsh01000001_pro_134, rhsh01000007_pro_3, rhsh01000036_pro_22	rhsg01000001_pro_174, rhsg01000005_pro_3, rhsg01000005_pro_328	rwhx01000002_pro_149, rwhx01000021_pro_67, rwhx01000035_pro_40	pyya01000004_pro_151, pyya01000020_pro_76, pyya01000029_pro_58	rzmt01000002_pro_200, rzmt01000006_pro_84, rzmt01000024_pro_3	rzmu01000002_pro_182, rzmu01000006_pro_3, rzmu01000030_pro_8	rwhw01000001_pro_79, rwhw01000004_pro_97, rwhw01000057_pro_3	nbta01000001_pro_8, nbta01000009_pro_182, nbta01000023_pro_219	rses01000004_pro_79, rses01000024_pro_3, rses01000036_pro_40	rzmv01000003_pro_78, rzmv01000006_pro_3, rzmv01000019_pro_75	rqxy01000021_pro_72, rqxy01000042_pro_34	rser01000002_pro_79, rser01000018_pro_74, rser01000029_pro_56	rrcr01000005_pro_3, rrcr01000043_pro_8	rwhv01000014_pro_79, rwhv01000020_pro_66, rwhv01000036_pro_8	cp011279_pro_1034, cp011279_pro_3021	cp010518_pro_1034, cp010518_pro_3023	PAQ31011_00440, PAQ31011_01236, PAQ31011_03025, PAQ31011_04563	PBR20603_00734, PBR20603_01561, PBR20603_03059	maos01000002_pro_20, maos01000028_pro_212, maos01000034_pro_50, maos01000049_pro_3	PCA20602_01086, PCA20602_01488, PCA20602_02918, PCA20602_04040	PCA31118_01214, PCA31118_01680, PCA31118_03742, PCA31118_04745	NA	NA	NA	PCO31010_01291, PCO31010_01624, PCO31010_02665	NA	NA	NA	NA	cp011807_pro_2282, cp011807_pro_38	jtcr01000004_pro_167, jtcr01000014_pro_179, jtcr01000026_pro_3	jtcs01000003_pro_73, jtcs01000011_pro_3, jtcs01000030_pro_7	PFI31113_00823, PFI31113_02979, PFI31113_03072	PHO31112_02341	PIN31009_00156, PIN31009_01774, PIN31009_02706, PIN31009_05002	PIN31115_00003, PIN31115_00363, PIN31115_01962, PIN31115_03588	PMO31116_04405	cp013480_pro_2124, cp013480_pro_3446, cp013480_pro_4969, cp013480_pro_70	PNO31109_02284	cp011253_pro_1508, cp011253_pro_20, cp011253_pro_2502, cp011253_pro_4461	PPN31114_00511, PPN31114_01734, PPN31114_01852, PPN31114_02176	cp006900_pro_4249
OG0000016	muhy01000001_pro_565	PAN31117_01030, PAN31117_01314	PAN31108_00504, PAN31108_04038	cp011501_pro_3032, cp011501_pro_4243, cp011501_pro_4294	cp013481_pro_2961, cp013481_pro_695, cp013481_pro_750	cp014018_pro_3354, cp014018_pro_4602	PAP18089_02526, PAP18089_03244	rhsh01000006_pro_232, rhsh01000021_pro_26	rhsg01000004_pro_420, rhsg01000013_pro_26	rwhx01000019_pro_2, rwhx01000030_pro_36	pyya01000026_pro_2, pyya01000034_pro_36	rzmt01000021_pro_60, rzmt01000058_pro_2	rzmu01000022_pro_2, rzmu01000027_pro_36	rwhw01000014_pro_2, rwhw01000019_pro_36	nbta01000002_pro_29, nbta01000004_pro_244	rses01000028_pro_36, rses01000079_pro_15	rzmv01000025_pro_34	rqxy01000029_pro_36, rqxy01000047_pro_2	rser01000028_pro_70, rser01000035_pro_36	rrcr01000029_pro_36, rrcr01000048_pro_2	rwhv01000019_pro_1, rwhv01000027_pro_35	cp011279_pro_1396, cp011279_pro_2607, cp011279_pro_2658	cp010518_pro_1395, cp010518_pro_2606, cp010518_pro_2657	PAQ31011_00900, PAQ31011_02366	PBR20603_01259, PBR20603_03428	maos01000021_pro_108, maos01000035_pro_59, maos01000056_pro_12	PCA20602_00546, PCA20602_04738	PCA31118_00386, PCA31118_02551	B6_01073, B6_01523	PCE31106_02747, PCE31106_04157	PCE31107_01147, PCE31107_01733	PCO31010_00881, PCO31010_05057	PCO31110_01673, PCO31110_03114	PCO31111_00898, PCO31111_02996	kb944451_pro_69, kb944457_pro_226	PEP31012_00613, PEP31012_01950	cp011807_pro_2560, cp011807_pro_3731, cp011807_pro_3786	jtcr01000019_pro_48, jtcr01000019_pro_97, jtcr01000035_pro_94	jtcs01000014_pro_225, jtcs01000047_pro_31, jtcs01000047_pro_80	PFI31113_00132, PFI31113_02145	PHO31112_01877, PHO31112_03424	PIN31009_03134, PIN31009_04689	PIN31115_02715, PIN31115_04863	PMO31116_00659, PMO31116_01811	cp013480_pro_1787, cp013480_pro_4556, cp013480_pro_4606	PNO31109_01233, PNO31109_02454	cp011253_pro_2799, cp011253_pro_4012, cp011253_pro_4066	PPN31114_00046, PPN31114_03722	cp006900_pro_1572, cp006900_pro_418, cp006900_pro_465
OG0000017	NA	PAN31117_00422, PAN31117_03004	PAN31108_02535	cp011501_pro_1220, cp011501_pro_832	cp013481_pro_2568, cp013481_pro_3837, cp013481_pro_4209	cp014018_pro_1244, cp014018_pro_1619, cp014018_pro_2975	PAP18089_00867, PAP18089_03651, PAP18089_04654	rhsh01000001_pro_232, rhsh01000002_pro_252, rhsh01000010_pro_33	rhsg01000001_pro_272, rhsg01000003_pro_253, rhsg01000008_pro_33	rwhx01000002_pro_51, rwhx01000006_pro_32, rwhx01000029_pro_45	pyya01000004_pro_53, pyya01000007_pro_44, pyya01000010_pro_32	rzmt01000009_pro_32, rzmt01000025_pro_16, rzmt01000030_pro_18	rzmu01000002_pro_85, rzmu01000024_pro_32, rzmu01000025_pro_19	rwhw01000001_pro_177, rwhw01000007_pro_31, rwhw01000021_pro_44	nbta01000008_pro_434, nbta01000010_pro_33, nbta01000023_pro_120	rses01000008_pro_91, rses01000023_pro_19, rses01000031_pro_44	rzmv01000003_pro_175, rzmv01000027_pro_32, rzmv01000031_pro_19	rqxy01000009_pro_32, rqxy01000013_pro_85, rqxy01000030_pro_44	rser01000007_pro_30, rser01000047_pro_16	rrcr01000002_pro_85, rrcr01000007_pro_32, rrcr01000030_pro_19	rwhv01000004_pro_49, rwhv01000006_pro_32, rwhv01000025_pro_19	cp011279_pro_3900, cp011279_pro_4276	cp010518_pro_3883, cp010518_pro_4261	PAQ31011_01822, PAQ31011_02857, PAQ31011_04139	PBR20603_00210, PBR20603_02265	maos01000001_pro_275	PCA20602_04009, PCA20602_04982	PCA31118_00892, PCA31118_01853, PCA31118_03089	B6_01385	PCE31106_02137	PCE31107_03271	PCO31010_03443, PCO31010_03587	PCO31110_00388, PCO31110_04848	PCO31111_00212, PCO31111_03628	kb944425_pro_201, kb944454_pro_390	PEP31012_02552	cp011807_pro_592, cp011807_pro_945	jtcr01000004_pro_58, jtcr01000022_pro_68, jtcr01000031_pro_90	jtcs01000012_pro_68, jtcs01000034_pro_37, jtcs01000038_pro_1	PFI31113_00552, PFI31113_01551, PFI31113_04688	PHO31112_00591, PHO31112_02293	PIN31009_00785, PIN31009_01204, PIN31009_02375	PIN31115_00960, PIN31115_01392, PIN31115_03925	PMO31116_01011, PMO31116_03064	cp013480_pro_2446, cp013480_pro_4014, cp013480_pro_684	PNO31109_00208, PNO31109_04041	cp011253_pro_624, cp011253_pro_995	PPN31114_02776, PPN31114_04589	cp006900_pro_3152, cp006900_pro_3480
OG0000018	NA	PAN31117_00575, PAN31117_01924, PAN31117_03402	PAN31108_01013, PAN31108_02659, PAN31108_03465, PAN31108_03466	cp011501_pro_2467, cp011501_pro_363	cp013481_pro_2450, cp013481_pro_4689	cp014018_pro_2856, cp014018_pro_761	PAP18089_00379, PAP18089_04042	rhsh01000001_pro_352, rhsh01000005_pro_12	rhsg01000001_pro_392, rhsg01000007_pro_12	rwhx01000035_pro_12, rwhx01000068_pro_11	pyya01000015_pro_19, pyya01000020_pro_48	rzmt01000002_pro_228, rzmt01000010_pro_92	rzmu01000030_pro_36, rzmu01000035_pro_11	rwhw01000004_pro_125, rwhw01000041_pro_25	nbta01000001_pro_36, nbta01000006_pro_91	rses01000036_pro_12, rses01000040_pro_25	rzmv01000019_pro_47, rzmv01000026_pro_11	rqxy01000053_pro_21	rser01000018_pro_47, rser01000019_pro_21	rrcr01000022_pro_49	rwhv01000005_pro_25, rwhv01000036_pro_36	cp011279_pro_3429, cp011279_pro_831	cp010518_pro_3412, cp010518_pro_831	PAQ31011_00102, PAQ31011_01272, PAQ31011_01989	PBR20603_00703, PBR20603_00961	maos01000001_pro_105, maos01000002_pro_53, maos01000028_pro_235, maos01000046_pro_41	PCA20602_00821, PCA20602_03116	PCA31118_00983, PCA31118_01248, PCA31118_02019	B6_01919, B6_02735	PCE31106_00031, PCE31106_03101	PCE31107_00194, PCE31107_02183	PCO31010_00098, PCO31010_01661, PCO31010_03735	PCO31110_00883, PCO31110_04459	PCO31111_00689, PCO31111_02154	kb944424_pro_102, kb944454_pro_896	PEP31012_01582, PEP31012_04148	cp011807_pro_2073, cp011807_pro_69	jtcr01000027_pro_125, jtcr01000037_pro_155	jtcs01000018_pro_124, jtcs01000026_pro_155	PFI31113_00667, PFI31113_02948	PHO31112_00503, PHO31112_03807	PIN31009_00192, PIN31009_02083, PIN31009_03874	PIN31115_00400, PIN31115_02275, PIN31115_04020	PMO31116_00095, PMO31116_01526	cp013480_pro_106, cp013480_pro_2563, cp013480_pro_3192	PNO31109_00931, PNO31109_01938	cp011253_pro_2222, cp011253_pro_56, cp011253_pro_774	PPN31114_00960, PPN31114_01452, PPN31114_02209	cp006900_pro_2061, cp006900_pro_3959
OG0000019	NA	PAN31117_01701, PAN31117_04199	PAN31108_00103	cp011501_pro_2588, cp011501_pro_3799	cp013481_pro_1205, cp013481_pro_2582	cp014018_pro_2989, cp014018_pro_4217	PAP18089_02118, PAP18089_04668	rhsh01000001_pro_218, rhsh01000016_pro_59	rhsg01000001_pro_258, rhsg01000004_pro_47	rwhx01000002_pro_65, rwhx01000010_pro_25	pyya01000004_pro_67, pyya01000005_pro_66	rzmt01000008_pro_65, rzmt01000025_pro_2	rzmu01000002_pro_99, rzmu01000011_pro_17	rwhw01000001_pro_163, rwhw01000031_pro_24	nbta01000023_pro_134, nbta01000023_pro_549	rses01000009_pro_79, rses01000023_pro_5	rzmv01000003_pro_161, rzmv01000011_pro_17	rqxy01000008_pro_24, rqxy01000013_pro_99	rser01000002_pro_161, rser01000008_pro_65	rrcr01000002_pro_99, rrcr01000012_pro_23	rwhv01000004_pro_63, rwhv01000009_pro_76	cp011279_pro_2163, cp011279_pro_952	cp010518_pro_2162, cp010518_pro_952	PAQ31011_00330, PAQ31011_04904	PBR20603_02387	maos01000026_pro_76, maos01000039_pro_139	PCA20602_00072, PCA20602_00985	PCA31118_00805, PCA31118_04030	B6_00965	PCE31106_01157	PCE31107_00098, PCE31107_01506, PCE31107_04517	PCO31010_00342, PCO31010_01154	PCO31110_03491	PCO31111_01547	kb944452_pro_119	PEP31012_00234	cp011807_pro_2209, cp011807_pro_3324	jtcr01000002_pro_60, jtcr01000004_pro_96, jtcr01000009_pro_224	jtcs01000003_pro_2, jtcs01000013_pro_60, jtcs01000022_pro_65	PFI31113_00507, PFI31113_02634, PFI31113_04036	PHO31112_01565	PIN31009_02712, PIN31009_03359, PIN31009_04136	PIN31115_03002, PIN31115_03582, PIN31115_04584	PMO31116_03259, PMO31116_04170, PMO31116_04326	cp013480_pro_1559, cp013480_pro_2118, cp013480_pro_4152	PNO31109_00092, PNO31109_00851, PNO31109_03111, PNO31109_03173	cp011253_pro_2402, cp011253_pro_3067	PPN31114_00505, PPN31114_03246	cp006900_pro_2340, cp006900_pro_4247, cp006900_pro_790, cp006900_pro_912
OG0000020	NA	PAN31117_03614	PAN31108_01216	cp011501_pro_2373, cp011501_pro_3133, cp011501_pro_3538	cp013481_pro_1451, cp013481_pro_2400, cp013481_pro_3067	cp014018_pro_2758, cp014018_pro_3459, cp014018_pro_3970	PAP18089_02792, PAP18089_04184, PAP18089_04566	rhsh01000003_pro_217, rhsh01000014_pro_6, rhsh01000017_pro_12	rhsg01000006_pro_216, rhsg01000010_pro_6, rhsg01000016_pro_11	rwhx01000013_pro_11, rwhx01000023_pro_3, rwhx01000031_pro_45	pyya01000009_pro_44, pyya01000018_pro_46, pyya01000028_pro_3	rzmt01000001_pro_463, rzmt01000007_pro_67, rzmt01000015_pro_12	rzmu01000015_pro_12, rzmu01000016_pro_45, rzmu01000023_pro_3	rwhw01000006_pro_11, rwhw01000020_pro_45, rwhw01000052_pro_3	nbta01000006_pro_189, nbta01000012_pro_77, nbta01000013_pro_68	rses01000007_pro_30, rses01000029_pro_45, rses01000061_pro_3	rzmv01000004_pro_175, rzmv01000007_pro_101, rzmv01000008_pro_45	rqxy01000006_pro_30, rqxy01000015_pro_45, rqxy01000084_pro_14	rser01000013_pro_78, rser01000024_pro_19, rser01000044_pro_3	rrcr01000004_pro_78, rrcr01000021_pro_3, rrcr01000031_pro_45	rwhv01000003_pro_63, rwhv01000012_pro_44, rwhv01000021_pro_3	cp011279_pro_1497, cp011279_pro_1902, cp011279_pro_736	cp010518_pro_1496, cp010518_pro_1901, cp010518_pro_736	PAQ31011_03711	PBR20603_02751, PBR20603_03638	maos01000045_pro_14	PCA20602_02254	PCA31118_03962, PCA31118_04424	B6_02875, B6_03708	PCE31106_02461, PCE31106_04438	PCE31107_01567, PCE31107_02126, PCE31107_03296	PCO31010_04273	PCO31110_03734	PCO31111_01007, PCO31111_03302	kb944426_pro_24, kb944431_pro_125	PEP31012_03964, PEP31012_04383	cp011807_pro_3153	jtcr01000024_pro_22, jtcr01000037_pro_70	jtcs01000026_pro_70, jtcs01000037_pro_16	PFI31113_03647, PFI31113_04565	PHO31112_03972, PHO31112_04554, PHO31112_05165	PIN31009_03768, PIN31009_04373	PIN31115_03339, PIN31115_04126	PMO31116_02192, PMO31116_03498, PMO31116_03816	cp013480_pro_1232, cp013480_pro_2721	PNO31109_01879, PNO31109_02497	cp011253_pro_3409	PPN31114_01061, PPN31114_04425	cp006900_pro_1079, cp006900_pro_2899
OG0000021	NA	PAN31117_00246, PAN31117_00476, PAN31117_03949	PAN31108_00650, PAN31108_00785, PAN31108_02920	cp011501_pro_684	cp013481_pro_4360	NA	PAP18089_00714	NA	NA	NA	NA	NA	NA	NA	nbta01000006_pro_207, nbta01000008_pro_284	NA	NA	NA	NA	NA	NA	cp011279_pro_3752	cp010518_pro_3735	PAQ31011_01502, PAQ31011_01638, PAQ31011_04544	PBR20603_00367, PBR20603_00707, PBR20603_03630	maos01000001_pro_466, maos01000027_pro_71, maos01000039_pro_44, maos01000094_pro_149	PCA20602_00118, PCA20602_00900, PCA20602_01769, PCA20602_01903, PCA20602_04569	PCA31118_01626, PCA31118_03951	B6_00547, B6_04153	PCE31106_00431, PCE31106_00608, PCE31106_03522	PCE31107_00545, PCE31107_04454	PCO31010_01908, PCO31010_02044, PCO31010_04823	PCO31110_00544, PCO31110_00887	PCO31111_00366, PCO31111_00693	kb944454_pro_544, kb944454_pro_900	PEP31012_01272, PEP31012_01779	cp011807_pro_426	jtcr01000003_pro_38, jtcr01000027_pro_121, jtcr01000037_pro_58	jtcs01000004_pro_63, jtcs01000018_pro_120, jtcs01000026_pro_58	PFI31113_01715, PFI31113_02952, PFI31113_03659	PHO31112_00149	PIN31009_00457, PIN31009_00590, PIN31009_03752	PIN31115_00634, PIN31115_00768, PIN31115_04142	PMO31116_01158, PMO31116_03494	cp013480_pro_2738, cp013480_pro_343, cp013480_pro_474	PNO31109_00373, PNO31109_02504, PNO31109_02974	cp011253_pro_2109, cp011253_pro_447	PPN31114_01076, PPN31114_02462, PPN31114_02593	cp006900_pro_2140, cp006900_pro_3638
OG0000022	NA	PAN31117_00969, PAN31117_00970	PAN31108_00448, PAN31108_00449	cp011501_pro_2980, cp011501_pro_2981	cp013481_pro_2907, cp013481_pro_2908	cp014018_pro_3299, cp014018_pro_3300	PAP18089_02467, PAP18089_02468	rhsh01000026_pro_51, rhsh01000026_pro_52	rhsg01000022_pro_51, rhsg01000022_pro_52	rwhx01000025_pro_3, rwhx01000025_pro_4	pyya01000012_pro_101, pyya01000012_pro_102	rzmt01000027_pro_28, rzmt01000027_pro_29	rzmu01000021_pro_62, rzmu01000021_pro_63	rwhw01000109_pro_3, rwhw01000109_pro_4	nbta01000023_pro_442, nbta01000023_pro_443	rses01000067_pro_15, rses01000067_pro_16	rzmv01000067_pro_10, rzmv01000067_pro_9	rqxy01000073_pro_13, rqxy01000073_pro_14	rser01000020_pro_17, rser01000020_pro_18	rrcr01000020_pro_6, rrcr01000020_pro_7	rwhv01000022_pro_48, rwhv01000022_pro_49	cp011279_pro_1344, cp011279_pro_1345	cp010518_pro_1343, cp010518_pro_1344	PAQ31011_00742, PAQ31011_00743	PBR20603_01199, PBR20603_01200	maos01000053_pro_23, maos01000053_pro_24	PCA20602_01359, PCA20602_01360	PCA31118_00447, PCA31118_00448	B6_01658, B6_03432, B6_03433	PCE31106_03373, PCE31106_04008, PCE31106_04009	PCE31107_01789, PCE31107_01790, PCE31107_04034	PCO31010_00748, PCO31010_00750	PCO31110_00105, PCO31110_01552, PCO31110_01553	PCO31111_00840, PCO31111_00841, PCO31111_04256	kb944428_pro_38, kb944428_pro_39, kb944454_pro_99	PEP31012_01891, PEP31012_01892	cp011807_pro_2505, cp011807_pro_2506	jtcr01000035_pro_38, jtcr01000035_pro_39	jtcs01000014_pro_280, jtcs01000014_pro_281	PFI31113_00194, PFI31113_00195	PHO31112_04602	PIN31009_03068, PIN31009_03069	PIN31115_02651, PIN31115_02652	PMO31116_00594, PMO31116_00595	cp013480_pro_1851, cp013480_pro_1852	PNO31109_04276, PNO31109_04277	cp011253_pro_2747, cp011253_pro_2748	PPN31114_00105, PPN31114_00106	cp006900_pro_1679, cp006900_pro_1680
OG0000023	NA	PAN31117_00523, PAN31117_02442, PAN31117_04344	PAN31108_03445, PAN31108_04967	cp011501_pro_293	cp013481_pro_4117, cp013481_pro_4761	cp014018_pro_1334, cp014018_pro_688	PAP18089_00304, PAP18089_00961	rhsh01000002_pro_340, rhsh01000011_pro_42	rhsg01000003_pro_341, rhsg01000005_pro_283	rwhx01000008_pro_74, rwhx01000009_pro_68	pyya01000003_pro_192, pyya01000024_pro_45	rzmt01000002_pro_155, rzmt01000005_pro_44	rzmu01000004_pro_37, rzmu01000005_pro_44	rwhw01000004_pro_52, rwhw01000008_pro_39	nbta01000009_pro_480, nbta01000021_pro_47	rses01000005_pro_101, rses01000014_pro_45	rzmv01000005_pro_125, rzmv01000010_pro_37	rqxy01000004_pro_74, rqxy01000005_pro_68	rser01000011_pro_44, rser01000021_pro_38	rrcr01000009_pro_74, rrcr01000010_pro_44	rwhv01000007_pro_73, rwhv01000008_pro_44	cp011279_pro_3359	cp010518_pro_3342	PAQ31011_01923, PAQ31011_01982, PAQ31011_03978	PBR20603_00120	maos01000001_pro_120, maos01000001_pro_170, maos01000050_pro_151	PCA20602_03061, PCA20602_03108, PCA20602_03405	PCA31118_00051, PCA31118_00060, PCA31118_01977	NA	PCE31106_02910	NA	PCO31010_03679, PCO31010_03727, PCO31010_04054	PCO31110_00264	NA	kb944454_pro_264	NA	cp011807_pro_1244, cp011807_pro_685	jtcr01000002_pro_81, jtcr01000009_pro_49, jtcr01000027_pro_45, jtcr01000027_pro_60	jtcs01000013_pro_81, jtcs01000018_pro_45, jtcs01000018_pro_60, jtcs01000044_pro_18	PFI31113_01455, PFI31113_01924, PFI31113_02657, PFI31113_03022, PFI31113_03056	PHO31112_02155	PIN31009_00915, PIN31009_01499, PIN31009_02415, PIN31009_02483, PIN31009_02526, PIN31009_02588, PIN31009_02592	PIN31115_01108, PIN31115_01681, PIN31115_03708, PIN31115_03712, PIN31115_03774, PIN31115_03817, PIN31115_03885	NA	cp013480_pro_2241, cp013480_pro_2244, cp013480_pro_2307, cp013480_pro_2407, cp013480_pro_3731, cp013480_pro_812	PNO31109_00131	cp011253_pro_1301, cp011253_pro_1313, cp011253_pro_1533, cp011253_pro_2911, cp011253_pro_727	PPN31114_00617, PPN31114_00619, PPN31114_00699, PPN31114_00807, PPN31114_02891, PPN31114_04878	NA
OG0000024	NA	PAN31117_01585, PAN31117_02247, PAN31117_02407	PAN31108_04418	cp011501_pro_218, cp011501_pro_3918	cp013481_pro_1083, cp013481_pro_39	cp014018_pro_4342, cp014018_pro_632	PAP18089_00233, PAP18089_01993	rhsh01000011_pro_98, rhsh01000022_pro_18	rhsg01000004_pro_172, rhsg01000005_pro_227	rwhx01000008_pro_20, rwhx01000039_pro_31	pyya01000003_pro_83, pyya01000043_pro_19	rzmt01000002_pro_82, rzmt01000033_pro_53	rzmu01000004_pro_91, rzmu01000009_pro_69	rwhw01000037_pro_30, rwhw01000099_pro_3	nbta01000009_pro_409, nbta01000023_pro_674	rses01000005_pro_47, rses01000018_pro_19	rzmv01000010_pro_91, rzmv01000021_pro_67	rqxy01000004_pro_20, rqxy01000020_pro_68	rser01000005_pro_156, rser01000022_pro_5	rrcr01000009_pro_20, rrcr01000019_pro_30	rwhv01000007_pro_20, rwhv01000015_pro_67	cp011279_pro_2282, cp011279_pro_3236, cp011279_pro_3254, cp011279_pro_3272, cp011279_pro_3290	cp010518_pro_2281, cp010518_pro_3238, cp010518_pro_3256, cp010518_pro_3274	PAQ31011_01150, PAQ31011_02656	PBR20603_00850, PBR20603_02511	maos01000022_pro_65, maos01000029_pro_80	PCA20602_00276, PCA20602_01406	PCA31118_01103, PCA31118_02192	B6_00849, B6_02080	PCE31106_00610, PCE31106_01043, PCE31106_03276	PCE31107_00041, PCE31107_01388	PCO31010_01531, PCO31010_02355	PCO31110_01038, PCO31110_03369	PCO31111_01382, PCO31111_01664	kb944452_pro_241, kb944459_pro_21	PEP31012_00353, PEP31012_04611	cp011807_pro_3501, cp011807_pro_4403	jtcr01000005_pro_5, jtcr01000009_pro_108	jtcs01000019_pro_5, jtcs01000022_pro_181	PFI31113_01860, PFI31113_03328	PHO31112_01439, PHO31112_02568	PIN31009_00046, PIN31009_04005	PIN31115_00232, PIN31115_04307	PMO31116_01628, PMO31116_03140	cp013480_pro_4276, cp013480_pro_5197	PNO31109_02029, PNO31109_03440	cp011253_pro_3768	PPN31114_02075, PPN31114_03379	cp006900_pro_4050, cp006900_pro_681
OG0000025	muhy01000003_pro_1	PAN31117_02773, PAN31117_05288	PAN31108_03823, PAN31108_05055	cp011501_pro_2108, cp011501_pro_4623	cp013481_pro_2208, cp013481_pro_294	cp014018_pro_2563, cp014018_pro_371	PAP18089_01712, PAP18089_03721	rhsh01000004_pro_332, rhsh01000027_pro_34	rhsg01000002_pro_443, rhsg01000011_pro_34	rwhx01000001_pro_16, rwhx01000050_pro_32	pyya01000001_pro_494, pyya01000042_pro_2	rzmt01000001_pro_252, rzmt01000041_pro_32	rzmu01000001_pro_425, rzmu01000075_pro_5	rwhw01000040_pro_35, rwhw01000116_pro_5	nbta01000009_pro_147, nbta01000022_pro_121	rses01000030_pro_34, rses01000101_pro_2	rzmv01000002_pro_255, rzmv01000048_pro_32	rqxy01000052_pro_32, rqxy01000079_pro_10	rser01000003_pro_161, rser01000082_pro_2	rrcr01000052_pro_32, rrcr01000053_pro_33	rwhv01000035_pro_16, rwhv01000055_pro_32	cp011279_pro_2986, cp011279_pro_470	cp010518_pro_2988, cp010518_pro_470	PAQ31011_03472, PAQ31011_04973	PBR20603_02014, PBR20603_03956	maos01000055_pro_34, maos01000065_pro_18	PCA20602_02778, PCA20602_03748	PCA31118_04182, PCA31118_05337	B6_00401, B6_00402	PCE31106_02191, PCE31106_04028	PCE31107_03505, PCE31107_04624	PCO31010_03091, PCO31010_05310	PCO31110_02701, PCO31110_04323	PCO31111_04139, PCO31111_04956	kb944423_pro_201, kb944455_pro_29	PEP31012_03175, PEP31012_04298	cp011807_pro_1793, cp011807_pro_4136	jtcr01000021_pro_34, jtcr01000045_pro_33	jtcs01000017_pro_106, jtcs01000039_pro_33	PFI31113_03888, PFI31113_04367	PHO31112_01225, PHO31112_03083	PIN31009_02262, PIN31009_05527	PIN31115_02452, PIN31115_05504	PMO31116_03767, PMO31116_04195	cp013480_pro_3021, cp013480_pro_4933	PNO31109_03639, PNO31109_04218	cp011253_pro_1916, cp011253_pro_4409	PPN31114_01268, PPN31114_05252	cp006900_pro_2322, cp006900_pro_33
OG0000026	NA	PAN31117_00443, PAN31117_03548	PAN31108_01277, PAN31108_03385, PAN31108_04263	cp011501_pro_3488, cp011501_pro_852	cp013481_pro_1502, cp013481_pro_4188	cp014018_pro_1264, cp014018_pro_3918	PAP18089_00888, PAP18089_02845	rhsh01000002_pro_272, rhsh01000003_pro_166	rhsg01000003_pro_273, rhsg01000006_pro_165	rwhx01000029_pro_25, rwhx01000044_pro_34	pyya01000007_pro_24, pyya01000018_pro_97	rzmt01000007_pro_118, rzmt01000030_pro_38	rzmu01000016_pro_96, rzmu01000025_pro_39	rwhw01000021_pro_24, rwhw01000048_pro_34	nbta01000008_pro_454, nbta01000013_pro_119	rses01000031_pro_24, rses01000048_pro_34	rzmv01000007_pro_50, rzmv01000031_pro_39	rqxy01000015_pro_96, rqxy01000030_pro_24	rser01000024_pro_68, rser01000058_pro_4	rrcr01000030_pro_39, rrcr01000047_pro_34	rwhv01000025_pro_39	cp011279_pro_1852, cp011279_pro_3920	cp010518_pro_1851, cp010518_pro_3903	PAQ31011_01847, PAQ31011_03652	PBR20603_02798	maos01000001_pro_254, maos01000024_pro_18, maos01000036_pro_8, maos01000050_pro_159, maos01000058_pro_21	PCA20602_02193, PCA20602_03411, PCA20602_04398	PCA31118_00532, PCA31118_00534, PCA31118_01875, PCA31118_03366, PCA31118_04361	B6_03739	PCE31106_02430	PCE31107_03327	PCO31010_04344	PCO31110_00369, PCO31110_03783	PCO31111_03345	kb944431_pro_173, kb944454_pro_371	PEP31012_04414	cp011807_pro_3094, cp011807_pro_611	jtcr01000001_pro_48, jtcr01000011_pro_19	jtcs01000008_pro_19, jtcs01000025_pro_22	PFI31113_01531, PFI31113_04616	PHO31112_02273, PHO31112_04504, PHO31112_04654, PHO31112_04787	PIN31009_00821, PIN31009_04303	PIN31115_00991, PIN31115_03275	PMO31116_04531	cp013480_pro_1295, cp013480_pro_713	PNO31109_00188, PNO31109_01837, PNO31109_03918	cp011253_pro_3069, cp011253_pro_3350, cp011253_pro_645	PPN31114_04358	cp006900_pro_1116, cp006900_pro_632
OG0000027	NA	PAN31117_00505, PAN31117_05387	PAN31108_03424, PAN31108_04856	cp011501_pro_4410, cp011501_pro_904	cp013481_pro_4135, cp013481_pro_581	cp014018_pro_1317, cp014018_pro_154	PAP18089_00943, PAP18089_03945	rhsh01000002_pro_323, rhsh01000009_pro_4	rhsg01000003_pro_324, rhsg01000012_pro_4	rwhx01000003_pro_218, rwhx01000009_pro_85	pyya01000021_pro_4, pyya01000024_pro_28	rzmt01000005_pro_27, rzmt01000016_pro_92	rzmu01000005_pro_27, rzmu01000036_pro_39	rwhw01000008_pro_56, rwhw01000070_pro_4	nbta01000004_pro_70, nbta01000021_pro_30	rses01000014_pro_62, rses01000070_pro_4	rzmv01000005_pro_141, rzmv01000015_pro_90	rqxy01000005_pro_85, rqxy01000070_pro_16	rser01000011_pro_28, rser01000061_pro_15	rrcr01000010_pro_27, rrcr01000064_pro_4	rwhv01000008_pro_27, rwhv01000073_pro_16	cp011279_pro_2773, cp011279_pro_3972	cp010518_pro_2774, cp010518_pro_3955	PAQ31011_01904, PAQ31011_05296	PBR20603_00138, PBR20603_04137	maos01000001_pro_189, maos01000048_pro_50	PCA20602_03042, PCA20602_03543	PCA31118_01954, PCA31118_04465	B6_01217, B6_01359	PCE31106_00643, PCE31106_02389	PCE31107_00748, PCE31107_01572, PCE31107_03687	PCO31010_03660, PCO31010_04429	PCO31110_00299, PCO31110_03983	PCO31111_00141, PCO31111_02540	kb944434_pro_4, kb944454_pro_299	PEP31012_01077, PEP31012_03352	cp011807_pro_3906, cp011807_pro_664	jtcr01000011_pro_67, jtcr01000052_pro_23	jtcs01000008_pro_67, jtcs01000043_pro_4	PFI31113_01480, PFI31113_04199	PHO31112_02193, PHO31112_02862	PIN31009_00895, PIN31009_05221	PIN31115_01088, PIN31115_05251	PMO31116_00957, PMO31116_03922	cp013480_pro_4717, cp013480_pro_788	PNO31109_00147, PNO31109_02896	cp011253_pro_4190, cp011253_pro_709	PPN31114_02867, PPN31114_05004	cp006900_pro_241, cp006900_pro_3428
OG0000028	NA	PAN31117_00929, PAN31117_05303	PAN31108_00405, PAN31108_03838	cp011501_pro_2945, cp011501_pro_4637	cp013481_pro_280, cp013481_pro_2871	cp014018_pro_3263, cp014018_pro_385	PAP18089_02431, PAP18089_03707	rhsh01000026_pro_15, rhsh01000027_pro_20	rhsg01000011_pro_20, rhsg01000022_pro_15	rwhx01000025_pro_40, rwhx01000050_pro_18	pyya01000042_pro_16, pyya01000045_pro_6	rzmt01000041_pro_18, rzmt01000044_pro_26	rzmu01000021_pro_26, rzmu01000048_pro_18	rwhw01000032_pro_34, rwhw01000061_pro_18	nbta01000009_pro_161, nbta01000023_pro_407	rses01000044_pro_12, rses01000057_pro_18	rzmv01000041_pro_12, rzmv01000048_pro_18	rqxy01000048_pro_24, rqxy01000052_pro_18	rser01000020_pro_52, rser01000054_pro_18	rrcr01000020_pro_43, rrcr01000052_pro_18	rwhv01000022_pro_12, rwhv01000055_pro_18	cp011279_pro_1309, cp011279_pro_3000	cp010518_pro_1308, cp010518_pro_3002	PAQ31011_00703, PAQ31011_01765, PAQ31011_04957	PBR20603_01159, PBR20603_03970	maos01000023_pro_25, maos01000055_pro_18	PCA20602_01320, PCA20602_03763	PCA31118_00276, PCA31118_00488, PCA31118_04167	B6_02429	PCE31106_02900, PCE31106_03250, PCE31106_03972	PCE31107_00068, PCE31107_00815, PCE31107_01827	PCO31010_00709, PCO31010_03529, PCO31010_05294	PCO31110_01512	PCO31111_00803	kb944428_pro_78	PEP31012_01856	cp011807_pro_2466, cp011807_pro_4149	jtcr01000035_pro_5, jtcr01000045_pro_46	jtcs01000014_pro_314, jtcs01000039_pro_20	PFI31113_00233, PFI31113_04353	PHO31112_03096, PHO31112_03506	PIN31009_03027, PIN31009_05513	PIN31115_02610, PIN31115_05490	PMO31116_00555, PMO31116_02759, PMO31116_03780	cp013480_pro_1894, cp013480_pro_4948	PNO31109_00639, PNO31109_04231	cp011253_pro_2708, cp011253_pro_4424	PPN31114_00143, PPN31114_04096, PPN31114_05239	cp006900_pro_1714, cp006900_pro_20
OG0000029	muhy01000001_pro_214	PAN31117_00265, PAN31117_02366	PAN31108_03869, PAN31108_04489	cp011501_pro_1507, cp011501_pro_702	cp013481_pro_3562, cp013481_pro_4341	cp014018_pro_1113, cp014018_pro_1903	PAP18089_00733, PAP18089_04836	rhsh01000002_pro_120, rhsh01000023_pro_58	rhsg01000003_pro_120, rhsg01000019_pro_58	rwhx01000016_pro_88, rwhx01000018_pro_36	pyya01000002_pro_302, pyya01000011_pro_74	rzmt01000003_pro_10, rzmt01000023_pro_34	rzmu01000003_pro_10, rzmu01000010_pro_73	rwhw01000015_pro_10, rwhw01000022_pro_36	nbta01000008_pro_302, nbta01000014_pro_150	rses01000003_pro_164, rses01000027_pro_36	rzmv01000001_pro_300, rzmv01000033_pro_16	rqxy01000002_pro_163, rqxy01000007_pro_73	rser01000001_pro_11, rser01000036_pro_15	rrcr01000001_pro_10, rrcr01000011_pro_73	rwhv01000023_pro_35, rwhv01000041_pro_41	cp011279_pro_3770, cp011279_pro_4562	cp010518_pro_3753, cp010518_pro_4547	PAQ31011_01657, PAQ31011_04048	PBR20603_00348, PBR20603_03125	maos01000001_pro_447, maos01000036_pro_54	PCA20602_01923, PCA20602_03482	PCA31118_01693, PCA31118_03463	B6_03873, B6_04171	PCE31106_00449, PCE31106_03759	PCE31107_00563, PCE31107_04218	PCO31010_02064, PCO31010_03174	PCO31110_00525, PCO31110_04687	PCO31111_00347, PCO31111_02472	kb944429_pro_92, kb944454_pro_525	PEP31012_01254, PEP31012_02823	cp011807_pro_1211, cp011807_pro_447	jtcr01000003_pro_55, jtcr01000028_pro_24	jtcs01000004_pro_46, jtcs01000023_pro_24	PFI31113_01696, PFI31113_02584	PHO31112_00130, PHO31112_02803	PIN31009_00609, PIN31009_01453	PIN31115_00787, PIN31115_01639	PMO31116_01139, PMO31116_04268	cp013480_pro_3777, cp013480_pro_515	PNO31109_00354, PNO31109_03013	cp011253_pro_1259, cp011253_pro_467	PPN31114_02612, PPN31114_04841	cp006900_pro_2927, cp006900_pro_3620
OG0000030	muhy01000001_pro_322	PAN31117_00851, PAN31117_01993	PAN31108_02591	cp011501_pro_2404, cp011501_pro_2833	cp013481_pro_2433, cp013481_pro_2795	cp014018_pro_2791, cp014018_pro_3202	PAP18089_02358, PAP18089_03975	rhsh01000001_pro_417, rhsh01000001_pro_6	rhsg01000001_pro_457, rhsg01000001_pro_46	rwhx01000014_pro_26, rwhx01000017_pro_46	pyya01000017_pro_45, pyya01000023_pro_26	rzmt01000010_pro_26, rzmt01000014_pro_51	rzmu01000002_pro_311, rzmu01000017_pro_26	rwhw01000012_pro_46, rwhw01000028_pro_2	nbta01000006_pro_157, nbta01000023_pro_347	rses01000002_pro_132, rses01000002_pro_25, rses01000013_pro_46	rzmv01000014_pro_38, rzmv01000017_pro_55	rqxy01000012_pro_49, rqxy01000018_pro_24	rser01000014_pro_44, rser01000023_pro_47	rrcr01000014_pro_26, rrcr01000017_pro_49	rwhv01000005_pro_92, rwhv01000011_pro_46	cp011279_pro_1197, cp011279_pro_768	cp010518_pro_1197, cp010518_pro_768	PAQ31011_00026, PAQ31011_00592	PBR20603_00892, PBR20603_01087	maos01000051_pro_41, maos01000054_pro_26	PCA20602_00753	PCA31118_00579, PCA31118_01060	B6_02522, B6_02683	PCE31106_01558, PCE31106_03050	PCE31107_01885, PCE31107_02234	PCO31010_00029, PCO31010_00645	PCO31110_01435, PCO31110_04389	PCO31111_02090, PCO31111_02914	kb944424_pro_33, kb944435_pro_166	PEP31012_01723, PEP31012_04541	cp011807_pro_2006, cp011807_pro_2408	jtcr01000004_pro_273, jtcr01000037_pro_99	jtcs01000003_pro_179, jtcs01000026_pro_99	PFI31113_00306, PFI31113_00736	PHO31112_03571, PHO31112_03880	PIN31009_02907, PIN31009_03800	PIN31115_02504, PIN31115_04094	PMO31116_00028, PMO31116_00447	cp013480_pro_1980, cp013480_pro_2689	PNO31109_00698, PNO31109_04192	cp011253_pro_2154, cp011253_pro_2649	PPN31114_00343, PPN31114_01028	cp006900_pro_1769, cp006900_pro_2109
OG0000031	muhy01000001_pro_440	PAN31117_02305, PAN31117_03289	PAN31108_04753, PAN31108_05187	cp011501_pro_1449, cp011501_pro_1636	cp013481_pro_3370, cp013481_pro_3534, cp013481_pro_3618	cp014018_pro_1845, cp014018_pro_2069	PAP18089_04895	rhsh01000012_pro_104, rhsh01000063_pro_2	rhsg01000014_pro_104, rhsg01000050_pro_2	rwhx01000108_pro_2	pyya01000003_pro_118, pyya01000072_pro_2	rzmt01000081_pro_2	rzmu01000085_pro_2	rwhw01000146_pro_2	nbta01000014_pro_284, nbta01000014_pro_92	rses01000125_pro_2	rzmv01000093_pro_2	rqxy01000019_pro_52, rqxy01000111_pro_1	rser01000004_pro_167, rser01000101_pro_2	rrcr01000016_pro_43, rrcr01000104_pro_2	rwhv01000116_pro_2	cp011279_pro_4504, cp011279_pro_4691	cp010518_pro_4489, cp010518_pro_4676	PAQ31011_02907, PAQ31011_04106	PBR20603_03062, PBR20603_03809	maos01000022_pro_22, maos01000047_pro_53, maos01000061_pro_46	PCA20602_02785	PCA31118_03453, PCA31118_05404	B6_02973	PCE31106_03435	PCE31107_02591	PCO31010_03230, PCO31010_03912	PCO31110_00021, PCO31110_05132	PCO31111_02535, PCO31111_04990	kb944429_pro_154, kb944439_pro_2, kb944454_pro_23	PEP31012_00156, PEP31012_02129, PEP31012_02857	cp011807_pro_1159, cp011807_pro_1313	jtcr01000006_pro_50, jtcr01000028_pro_53, jtcr01000033_pro_1, jtcr01000060_pro_11	jtcs01000010_pro_46, jtcs01000023_pro_53, jtcs01000046_pro_2, jtcs01000052_pro_1	PFI31113_02523	PHO31112_05285	PIN31009_01395, PIN31009_01643	PIN31115_01581, PIN31115_01825	PMO31116_00746, PMO31116_04014	cp013480_pro_3571, cp013480_pro_3832	PNO31109_04330	cp011253_pro_1202, cp011253_pro_1405	PPN31114_00775, PPN31114_01848, PPN31114_04782	cp006900_pro_2828, cp006900_pro_2977
OG0000032	muhy01000001_pro_673	PAN31117_01963, PAN31117_02215	PAN31108_02313, PAN31108_02620	cp011501_pro_185, cp011501_pro_2431	cp013481_pro_73	cp014018_pro_2820, cp014018_pro_597	PAP18089_00199, PAP18089_04004	rhsh01000001_pro_388, rhsh01000007_pro_192	rhsg01000001_pro_428, rhsg01000005_pro_192	rwhx01000014_pro_56, rwhx01000033_pro_15	pyya01000003_pro_48, pyya01000023_pro_55	rzmt01000002_pro_48, rzmt01000010_pro_56	rzmu01000004_pro_125, rzmu01000017_pro_56	rwhw01000012_pro_16, rwhw01000024_pro_15	nbta01000006_pro_128, nbta01000009_pro_375	rses01000002_pro_103, rses01000002_pro_54, rses01000005_pro_13	rzmv01000017_pro_26, rzmv01000034_pro_15	rqxy01000018_pro_54, rqxy01000035_pro_15	rser01000022_pro_39, rser01000023_pro_16	rrcr01000014_pro_56, rrcr01000035_pro_15	rwhv01000005_pro_61, rwhv01000031_pro_15	cp011279_pro_3203, cp011279_pro_795	cp010518_pro_3205, cp010518_pro_795	PAQ31011_00055, PAQ31011_04761	PBR20603_00925, PBR20603_02866	maos01000022_pro_97, maos01000046_pro_3	PCA20602_00782, PCA20602_04233	PCA31118_01031, PCA31118_03541	B6_02047, B6_02702	PCE31106_03069, PCE31106_03818	PCE31107_00008, PCE31107_02215	PCO31010_00059, PCO31010_01499	PCO31110_01069, PCO31110_04422	PCO31111_01351, PCO31111_02122	kb944424_pro_65, kb944456_pro_15	PEP31012_02970, PEP31012_04560	cp011807_pro_2030, cp011807_pro_4364	jtcr01000005_pro_36, jtcr01000037_pro_125	jtcs01000019_pro_36, jtcs01000026_pro_125	PFI31113_00707, PFI31113_03294	PHO31112_02536, PHO31112_03848	PIN31009_00012, PIN31009_03826	PIN31115_00197, PIN31115_04068	PMO31116_00056, PMO31116_03517	cp013480_pro_2663, cp013480_pro_5163	PNO31109_00968, PNO31109_02064	cp011253_pro_2184, cp011253_pro_4647	PPN31114_01002, PPN31114_02043	cp006900_pro_2086, cp006900_pro_4082
OG0000033	NA	PAN31117_01430, PAN31117_01549	PAN31108_01891, PAN31108_01995	cp011501_pro_3954, cp011501_pro_4056	cp013481_pro_1046, cp013481_pro_942	cp014018_pro_4378, cp014018_pro_4483	PAP18089_01798, PAP18089_01955	rhsh01000006_pro_126, rhsh01000006_pro_20	rhsg01000004_pro_207, rhsg01000004_pro_313	rwhx01000007_pro_122, rwhx01000007_pro_17	pyya01000008_pro_127, pyya01000008_pro_20	rzmt01000004_pro_150, rzmt01000004_pro_254	rzmu01000009_pro_31, rzmu01000020_pro_16	rwhw01000011_pro_12, rwhw01000063_pro_15	nbta01000018_pro_48, nbta01000023_pro_711	rses01000018_pro_57, rses01000019_pro_12	rzmv01000020_pro_17, rzmv01000021_pro_30	rqxy01000020_pro_31, rqxy01000067_pro_4	rser01000005_pro_119, rser01000005_pro_15	rrcr01000050_pro_31, rrcr01000066_pro_12	rwhv01000015_pro_30, rwhv01000016_pro_12	cp011279_pro_2318, cp011279_pro_2420	cp010518_pro_2317, cp010518_pro_2419	PAQ31011_02502, PAQ31011_02621	PBR20603_02552, PBR20603_03299	maos01000032_pro_42, maos01000066_pro_6	PCA20602_00312, PCA20602_00430	PCA31118_02225, PCA31118_02343	B6_04519	PCE31106_01006, PCE31106_02840	PCE31107_01237, PCE31107_01357, PCE31107_02862	PCO31010_02390, PCO31010_02514	PCO31110_03218, PCO31110_03329	PCO31111_01706, PCO31111_04351	kb944457_pro_126, kb944457_pro_22	PEP31012_00384, PEP31012_00493	cp011807_pro_3535, cp011807_pro_3632	jtcr01000009_pro_74, jtcr01000056_pro_9	jtcs01000005_pro_9, jtcs01000050_pro_8	PFI31113_01898, PFI31113_02016	PHO31112_01399, PHO31112_01978	PIN31009_03967, PIN31009_05396	PIN31115_04269, PIN31115_04991	PMO31116_01698, PMO31116_03107	cp013480_pro_4314, cp013480_pro_4431	PNO31109_01061, PNO31109_03407	cp011253_pro_3800, cp011253_pro_3908	PPN31114_03418, PPN31114_03591	cp006900_pro_555, cp006900_pro_651
OG0000034	muhy01000001_pro_521	PAN31117_03233, PAN31117_04017	PAN31108_05251	cp011501_pro_1070, cp011501_pro_1689	cp013481_pro_3315, cp013481_pro_3987	cp014018_pro_1463, cp014018_pro_2123	PAP18089_05345	rhsh01000020_pro_103, rhsh01000031_pro_51	rhsg01000018_pro_103, rhsg01000024_pro_51, rhsg01000062_pro_1	rwhx01000034_pro_51, rwhx01000045_pro_1, rwhx01000112_pro_2	pyya01000031_pro_69, pyya01000033_pro_1, pyya01000075_pro_2	rzmt01000031_pro_1, rzmt01000032_pro_1, rzmt01000087_pro_1	rzmu01000026_pro_1, rzmu01000041_pro_1, rzmu01000090_pro_2	rwhw01000034_pro_1, rwhw01000050_pro_1, rwhw01000156_pro_3	nbta01000005_pro_3, nbta01000014_pro_340	rses01000049_pro_1, rses01000087_pro_1, rses01000135_pro_1	rzmv01000035_pro_51, rzmv01000050_pro_36, rzmv01000097_pro_1	rqxy01000028_pro_1, rqxy01000037_pro_61, rqxy01000117_pro_1	rser01000104_pro_1	rrcr01000028_pro_1, rrcr01000037_pro_61, rrcr01000107_pro_1	rwhv01000060_pro_1, rwhv01000089_pro_1, rwhv01000120_pro_1	cp011279_pro_4138, cp011279_pro_53	cp010518_pro_4122, cp010518_pro_53	PAQ31011_02081, PAQ31011_02964	PBR20603_04600	maos01000101_pro_1	PCA20602_02841, PCA20602_03217	PCA31118_03444, PCA31118_05408	B6_04628	PCE31106_00815, PCE31106_03487	PCE31107_00909	PCO31010_03856, PCO31010_05244	PCO31110_00150, PCO31110_02217	NA	kb944439_pro_55, kb944454_pro_144, kb944454_pro_146	PEP31012_00943, PEP31012_02174	cp011807_pro_1371, cp011807_pro_807	jtcr01000006_pro_1, jtcr01000038_pro_71, jtcr01000067_pro_1	jtcs01000032_pro_1, jtcs01000051_pro_1, jtcs01000065_pro_2	NA	NA	PIN31009_01065, PIN31009_01699, PIN31009_03478	PIN31115_01258, PIN31115_01881, PIN31115_02886	PMO31116_00817, PMO31116_04070	cp013480_pro_3516, cp013480_pro_952	PNO31109_04327	cp011253_pro_1458, cp011253_pro_859	PPN31114_01793, PPN31114_03041	cp006900_pro_2781, cp006900_pro_3286
OG0000035	NA	PAN31117_00132, PAN31117_02948	PAN31108_00766, PAN31108_02488	cp011501_pro_1291, cp011501_pro_578	cp013481_pro_3763, cp013481_pro_4470	cp014018_pro_1694, cp014018_pro_984	PAP18089_00602, PAP18089_03576	rhsh01000005_pro_233, rhsh01000010_pro_107	rhsg01000007_pro_234, rhsg01000008_pro_107	rwhx01000004_pro_40, rwhx01000006_pro_106	pyya01000002_pro_174, pyya01000010_pro_107	rzmt01000003_pro_137, rzmt01000009_pro_106	rzmu01000003_pro_137, rzmu01000031_pro_44	rwhw01000003_pro_60, rwhw01000081_pro_1	nbta01000008_pro_172, nbta01000010_pro_107	rses01000003_pro_36, rses01000008_pro_17	rzmv01000001_pro_173, rzmv01000037_pro_44	rqxy01000002_pro_36, rqxy01000009_pro_106	rser01000001_pro_137, rser01000007_pro_102	rrcr01000001_pro_137, rrcr01000007_pro_106	rwhv01000001_pro_48, rwhv01000006_pro_105	cp011279_pro_3645, cp011279_pro_4346	cp010518_pro_3628, cp010518_pro_4331	PAQ31011_01523, PAQ31011_04197	PBR20603_00479, PBR20603_02191	maos01000030_pro_106, maos01000031_pro_72	PCA20602_01790, PCA20602_03951	PCA31118_01509, PCA31118_03139	B6_03757, B6_04316	PCE31106_00322, PCE31106_02078	PCE31107_00444, PCE31107_03207	PCO31010_01929, PCO31010_03386	PCO31110_00657, PCO31110_04918	PCO31111_00477, PCO31111_03696	kb944425_pro_130, kb944454_pro_659	PEP31012_01372, PEP31012_02623	cp011807_pro_1001, cp011807_pro_316	jtcr01000018_pro_155, jtcr01000043_pro_16	jtcs01000016_pro_155, jtcs01000057_pro_1	PFI31113_01830, PFI31113_02369	PHO31112_00263, PHO31112_00662	PIN31009_00477, PIN31009_01246	PIN31115_00655, PIN31115_01433	PMO31116_01269, PMO31116_03018	cp013480_pro_363, cp013480_pro_3975	PNO31109_00479, PNO31109_03250	cp011253_pro_1045, cp011253_pro_328	PPN31114_02482, PPN31114_04629	cp006900_pro_3108, cp006900_pro_3727
OG0000036	NA	PAN31117_00674, PAN31117_05165	PAN31108_04741	cp011501_pro_1547, cp011501_pro_2635, cp011501_pro_3701	cp013481_pro_1306, cp013481_pro_2631, cp013481_pro_3464	cp014018_pro_1975, cp014018_pro_3038, cp014018_pro_4118	PAP18089_02223, PAP18089_04718, PAP18089_04794	rhsh01000001_pro_169, rhsh01000012_pro_34, rhsh01000042_pro_10	rhsg01000001_pro_209, rhsg01000014_pro_34, rhsg01000031_pro_8	rwhx01000002_pro_114, rwhx01000061_pro_8, rwhx01000087_pro_6	pyya01000004_pro_116, pyya01000011_pro_34, pyya01000048_pro_8	rzmt01000006_pro_49, rzmt01000040_pro_33, rzmt01000050_pro_8	rzmu01000002_pro_148, rzmu01000010_pro_34, rzmu01000051_pro_8	rwhw01000001_pro_114, rwhw01000060_pro_6, rwhw01000062_pro_8	nbta01000003_pro_21, nbta01000014_pro_190, nbta01000023_pro_184	rses01000004_pro_44, rses01000032_pro_33, rses01000059_pro_21	rzmv01000003_pro_112, rzmv01000030_pro_33, rzmv01000051_pro_21	rqxy01000007_pro_34, rqxy01000016_pro_40, rqxy01000061_pro_21	rser01000002_pro_112, rser01000031_pro_32, rser01000055_pro_6	rrcr01000002_pro_148, rrcr01000011_pro_34, rrcr01000058_pro_8	rwhv01000004_pro_112, rwhv01000034_pro_34, rwhv01000062_pro_21	cp011279_pro_2065, cp011279_pro_4602, cp011279_pro_999	cp010518_pro_2064, cp010518_pro_4587, cp010518_pro_999	PAQ31011_00403, PAQ31011_04808	PBR20603_03147	maos01000034_pro_86	PCA20602_01049	PCA31118_00747	B6_00166	PCE31106_00266, PCE31106_01323	PCE31107_00382, PCE31107_02037	PCO31010_00413, PCO31010_01259	PCO31110_04523	PCO31111_02233	kb944443_pro_84	PEP31012_03879	cp011807_pro_2246	jtcr01000002_pro_73, jtcr01000050_pro_4	jtcs01000013_pro_73, jtcs01000048_pro_8	PFI31113_00462, PFI31113_02648, PFI31113_03924	PHO31112_01701	PIN31009_00806, PIN31009_02668	PIN31115_00976, PIN31115_03626	PMO31116_00306, PMO31116_04285	cp013480_pro_2164, cp013480_pro_3408, cp013480_pro_698	NA	cp011253_pro_2468	PPN31114_00551, PPN31114_02790, PPN31114_02841	cp006900_pro_951
OG0000037	NA	PAN31117_01429, PAN31117_01547	PAN31108_01893, PAN31108_01996	cp011501_pro_3956, cp011501_pro_4057	cp013481_pro_1044, cp013481_pro_941	cp014018_pro_4380, cp014018_pro_4484	PAP18089_01797, PAP18089_01953	rhsh01000006_pro_127, rhsh01000006_pro_22	rhsg01000004_pro_209, rhsg01000004_pro_314	rwhx01000007_pro_120, rwhx01000007_pro_16	pyya01000008_pro_128, pyya01000008_pro_22	rzmt01000004_pro_149, rzmt01000004_pro_252	rzmu01000009_pro_29, rzmu01000020_pro_15	rwhw01000011_pro_11, rwhw01000063_pro_13	nbta01000018_pro_49, nbta01000023_pro_713	rses01000018_pro_59, rses01000019_pro_11	rzmv01000020_pro_16	rqxy01000020_pro_29, rqxy01000067_pro_5	rser01000005_pro_117, rser01000005_pro_14	rrcr01000050_pro_29, rrcr01000066_pro_11	rwhv01000016_pro_11	cp011279_pro_2320, cp011279_pro_2421	cp010518_pro_2319, cp010518_pro_2420	PAQ31011_02501, PAQ31011_02619	PBR20603_02554, PBR20603_03300	maos01000032_pro_41, maos01000066_pro_4	PCA20602_00314, PCA20602_00431	PCA31118_02227, PCA31118_02344	B6_00594, B6_04522	PCE31106_01004, PCE31106_02839	PCE31107_01236, PCE31107_01355, PCE31107_02861	PCO31010_02392, PCO31010_02515	PCO31110_03217, PCO31110_03327	PCO31111_01708, PCO31111_04352	kb944457_pro_127, kb944457_pro_24	PEP31012_00386, PEP31012_00494	cp011807_pro_3537, cp011807_pro_3633	jtcr01000009_pro_72, jtcr01000056_pro_8	jtcs01000005_pro_8, jtcs01000050_pro_6	PFI31113_01900, PFI31113_02017	PHO31112_01397, PHO31112_01977	PIN31009_03965, PIN31009_05395	PIN31115_04267, PIN31115_04990	PMO31116_01699, PMO31116_03105	cp013480_pro_4316, cp013480_pro_4432	PNO31109_01062, PNO31109_03405	cp011253_pro_3802, cp011253_pro_3909	PPN31114_03420, PPN31114_03592	cp006900_pro_554, cp006900_pro_649
OG0000038	NA	PAN31117_02748, PAN31117_03151, PAN31117_04195, PAN31117_04401	PAN31108_00391, PAN31108_01435, PAN31108_01436, PAN31108_04480, PAN31108_04934, PAN31108_05032	NA	cp013481_pro_1707	NA	PAP18089_01887, PAP18089_04363	rhsh01000008_pro_2, rhsh01000018_pro_72, rhsh01000026_pro_2	rhsg01000009_pro_3, rhsg01000017_pro_72, rhsg01000022_pro_2	rwhx01000025_pro_53, rwhx01000091_pro_2	pyya01000045_pro_19, pyya01000058_pro_9	rzmt01000044_pro_13, rzmt01000069_pro_2	rzmu01000021_pro_13, rzmu01000073_pro_6	rwhw01000114_pro_2, rwhw01000128_pro_1	nbta01000010_pro_201	rses01000082_pro_13, rses01000106_pro_2	rzmv01000049_pro_2, rzmv01000065_pro_13	rqxy01000077_pro_3, rqxy01000094_pro_2	rser01000020_pro_65, rser01000067_pro_9	rrcr01000020_pro_56, rrcr01000085_pro_2	rwhv01000083_pro_13, rwhv01000102_pro_2	NA	NA	PAQ31011_00656, PAQ31011_03447, PAQ31011_04830	PBR20603_01145, PBR20603_01613, PBR20603_03462, PBR20603_04289	maos01000038_pro_76	PCA20602_02047, PCA20602_04705	PCA31118_03943, PCA31118_04846, PCA31118_05345	B6_04436	NA	NA	PCO31010_01224	PCO31110_00990, PCO31110_01498, PCO31110_02109, PCO31110_02671	PCO31111_04618, PCO31111_04916	kb944423_pro_242, kb944428_pro_91, kb944439_pro_171	NA	cp011807_pro_1227, cp011807_pro_2455, cp011807_pro_2794, cp011807_pro_2911, cp011807_pro_4228	jtcr01000021_pro_8, jtcr01000051_pro_38	jtcs01000017_pro_132, jtcs01000028_pro_8	PFI31113_01318, PFI31113_03568	PHO31112_00739, PHO31112_01634, PHO31112_01635, PHO31112_01636, PHO31112_02794, PHO31112_03520, PHO31112_03542, PHO31112_04167, PHO31112_04293, PHO31112_05378	PIN31009_03012, PIN31009_03936, PIN31009_04675, PIN31009_05278	PIN31115_04238	PMO31116_00492, PMO31116_01825, PMO31116_04209, PMO31116_04210, PMO31116_04277	NA	PNO31109_02134, PNO31109_03971	cp011253_pro_1888, cp011253_pro_1890, cp011253_pro_3142, cp011253_pro_3146, cp011518_pro_73	PPN31114_00270	cp006900_pro_296
OG0000039	NA	PAN31117_01913	PAN31108_01929, PAN31108_02670, PAN31108_03458	cp011501_pro_2474	cp013481_pro_2459	cp014018_pro_2865	PAP18089_04051, PAP18089_04138, PAP18089_05314	rhsh01000001_pro_343	rhsg01000001_pro_383	rwhx01000038_pro_14, rwhx01000058_pro_3, rwhx01000059_pro_20	pyya01000006_pro_100, pyya01000015_pro_28, pyya01000056_pro_3	rzmt01000026_pro_40, rzmt01000037_pro_34, rzmt01000038_pro_3	rzmu01000007_pro_104, rzmu01000007_pro_34, rzmu01000035_pro_20, rzmu01000049_pro_27	rwhw01000041_pro_16, rwhw01000044_pro_21	nbta01000006_pro_3, nbta01000006_pro_82, nbta01000023_pro_41	rses01000038_pro_14, rses01000040_pro_16, rses01000041_pro_3, rses01000128_pro_1	rzmv01000026_pro_20, rzmv01000028_pro_34, rzmv01000075_pro_3	rqxy01000040_pro_34, rqxy01000053_pro_12	rser01000006_pro_58, rser01000019_pro_30, rser01000039_pro_14, rser01000043_pro_3	rrcr01000022_pro_40, rrcr01000041_pro_34	rwhv01000005_pro_16, rwhv01000044_pro_40, rwhv01000082_pro_14	cp011279_pro_838	cp010518_pro_838	PAQ31011_00113, PAQ31011_01978, PAQ31011_03827	PBR20603_00970	maos01000001_pro_124, maos01000038_pro_97, maos01000052_pro_6	PCA20602_00357, PCA20602_00832, PCA20602_03104, PCA20602_04891	PCA31118_00972	B6_00536, B6_02740, B6_02861	PCE31106_03106, PCE31106_03155, PCE31106_03533, PCE31106_04450	PCE31107_02178, PCE31107_04442	PCO31010_00109	PCO31110_00406, PCO31110_04468	PCO31111_02163	kb944424_pro_111, kb944454_pro_408	PEP31012_04153, PEP31012_04203, PEP31012_04486	cp011807_pro_2084, cp011807_pro_566	jtcr01000058_pro_6	jtcs01000036_pro_6	PFI31113_00655	PHO31112_03798	PIN31009_00948, PIN31009_02275, PIN31009_02467	PIN31115_01142, PIN31115_03833, PIN31115_04009	PMO31116_00103	cp013480_pro_2355, cp013480_pro_2554, cp013480_pro_845	NA	cp011253_pro_2235	PPN31114_00713, PPN31114_00949	cp006900_pro_2056, cp006900_pro_3505
OG0000040	NA	PAN31117_02468, PAN31117_02538, PAN31117_04178, PAN31117_05121	NA	cp011501_pro_1186, cp011501_pro_1575, cp011501_pro_3301	cp013481_pro_1693, cp013481_pro_1697, cp013481_pro_3434, cp013481_pro_3873	cp014018_pro_1583, cp014018_pro_2005	PAP18089_04763, PAP18089_04899, PAP18089_05049, PAP18089_05054	rhsh01000012_pro_4, rhsh01000025_pro_4, rhsh01000040_pro_3, rhsh01000040_pro_7	rhsg01000014_pro_4, rhsg01000021_pro_4, rhsg01000029_pro_3, rhsg01000029_pro_7	rwhx01000036_pro_3, rwhx01000036_pro_7, rwhx01000056_pro_25, rwhx01000078_pro_5	pyya01000011_pro_4, pyya01000037_pro_3, pyya01000037_pro_7, pyya01000049_pro_4	rzmt01000035_pro_3, rzmt01000035_pro_7, rzmt01000040_pro_3, rzmt01000047_pro_4	rzmu01000010_pro_4, rzmu01000037_pro_3, rzmu01000037_pro_7, rzmu01000047_pro_4	rwhw01000043_pro_3, rwhw01000043_pro_7, rwhw01000059_pro_25, rwhw01000074_pro_4	nbta01000005_pro_121, nbta01000014_pro_220, nbta01000017_pro_164, nbta01000017_pro_169	rses01000032_pro_4, rses01000043_pro_4, rses01000043_pro_8, rses01000083_pro_4	rzmv01000030_pro_4, rzmv01000042_pro_3, rzmv01000042_pro_7, rzmv01000059_pro_5	rqxy01000007_pro_4, rqxy01000043_pro_3, rqxy01000043_pro_7, rqxy01000080_pro_5	rser01000031_pro_4, rser01000041_pro_3, rser01000041_pro_7, rser01000053_pro_18	rrcr01000011_pro_4, rrcr01000044_pro_3, rrcr01000044_pro_8, rrcr01000056_pro_18	rwhv01000034_pro_5, rwhv01000045_pro_3, rwhv01000045_pro_8, rwhv01000077_pro_5	cp011279_pro_1665, cp011279_pro_4630	cp010518_pro_1664, cp010518_pro_4615	PAQ31011_02186, PAQ31011_03880, PAQ31011_03948	PBR20603_03179, PBR20603_04355, PBR20603_04702	maos01000025_pro_4, maos01000050_pro_84	PCA20602_04846	NA	NA	NA	NA	PCO31010_03929, PCO31010_05144	PCO31110_02118, PCO31110_02125, PCO31110_04816, PCO31110_05117	PCO31111_04605, PCO31111_04608, PCO31111_05062	kb944426_pro_240, kb944429_pro_4, kb944430_pro_4, kb944433_pro_4	NA	NA	NA	NA	PFI31113_02672, PFI31113_04905	PHO31112_02698, PHO31112_04229, PHO31112_05203	PIN31009_00984, PIN31009_01160, PIN31009_02968	PIN31115_01177, PIN31115_01351, PIN31115_02565	NA	cp013480_pro_1048, cp013480_pro_1916, cp013480_pro_3770, cp013480_pro_874	NA	NA	NA	NA
OG0000041	muhy01000003_pro_51	PAN31117_01753, PAN31117_04619	PAN31108_03004	cp011501_pro_288, cp011501_pro_3760	cp013481_pro_1244, cp013481_pro_4766	cp014018_pro_4178, cp014018_pro_683	PAP18089_00299, PAP18089_02157	rhsh01000011_pro_47, rhsh01000018_pro_81	rhsg01000005_pro_278, rhsg01000017_pro_81	rwhx01000008_pro_69, rwhx01000010_pro_64	pyya01000003_pro_187, pyya01000005_pro_105	rzmt01000002_pro_150, rzmt01000008_pro_104	rzmu01000004_pro_42, rzmu01000011_pro_56	rwhw01000004_pro_47, rwhw01000017_pro_26	nbta01000009_pro_475, nbta01000023_pro_511	rses01000005_pro_96, rses01000009_pro_40	rzmv01000010_pro_42, rzmv01000011_pro_56	rqxy01000004_pro_69, rqxy01000008_pro_63	rser01000008_pro_103, rser01000021_pro_43	rrcr01000009_pro_69, rrcr01000012_pro_62	rwhv01000007_pro_68, rwhv01000009_pro_37	cp011279_pro_2124, cp011279_pro_3354	cp010518_pro_2123, cp010518_pro_3337	PAQ31011_00251, PAQ31011_02835	PBR20603_02331	maos01000026_pro_104, maos01000050_pro_164	PCA20602_00097, PCA20602_03418	PCA31118_00514, PCA31118_04055	B6_00447, B6_02210, B6_03896	PCE31106_01196	PCE31107_01545, PCE31107_02713	PCO31010_00280, PCO31010_02181	PCO31110_03536	PCO31111_01502	kb944452_pro_74	PEP31012_00196, PEP31012_00835, PEP31012_02841	NA	jtcr01000009_pro_263	jtcs01000022_pro_26	PFI31113_03997	PHO31112_01610	PIN31009_03676, PIN31009_04175	PIN31115_04623, PIN31115_05166	PMO31116_00486, PMO31116_03298	cp013480_pro_2815, cp013480_pro_4115	PNO31109_03154	cp011253_pro_3601	PPN31114_03206	cp006900_pro_1730, cp006900_pro_826, cp006900_pro_855
OG0000042	NA	PAN31117_01974, PAN31117_03247	PAN31108_02609, PAN31108_04797	cp011501_pro_1674, cp011501_pro_2420	cp013481_pro_3330	cp014018_pro_2108, cp014018_pro_2809	PAP18089_03993, PAP18089_05296	rhsh01000001_pro_399, rhsh01000031_pro_36	rhsg01000001_pro_439, rhsg01000024_pro_36	rwhx01000014_pro_44, rwhx01000034_pro_37	pyya01000023_pro_44, pyya01000033_pro_16	rzmt01000010_pro_44, rzmt01000031_pro_15	rzmu01000017_pro_44, rzmu01000026_pro_15	rwhw01000012_pro_28, rwhw01000034_pro_15	nbta01000006_pro_139, nbta01000014_pro_325	rses01000002_pro_115, rses01000002_pro_42, rses01000039_pro_3	rzmv01000017_pro_38, rzmv01000035_pro_37	rqxy01000018_pro_42, rqxy01000028_pro_15	rser01000023_pro_28, rser01000034_pro_14	rrcr01000014_pro_44, rrcr01000028_pro_15	rwhv01000005_pro_73, rwhv01000043_pro_3	cp011279_pro_38, cp011279_pro_784	cp010518_pro_38, cp010518_pro_784	PAQ31011_00044, PAQ31011_02950	PBR20603_00914, PBR20603_04585	maos01000047_pro_14, maos01000054_pro_8	PCA20602_00771, PCA20602_02826	PCA31118_01042, PCA31118_04996	B6_02693, B6_03477	PCE31106_03060, PCE31106_03472	PCE31107_02224, PCE31107_02554	PCO31010_00048, PCO31010_03871	PCO31110_02201, PCO31110_04411	PCO31111_02111, PCO31111_04713	kb944424_pro_54, kb944439_pro_41	PEP31012_02159, PEP31012_04551	cp011807_pro_1352, cp011807_pro_2019	jtcr01000006_pro_14, jtcr01000037_pro_114	jtcs01000010_pro_10, jtcs01000026_pro_114	PFI31113_00718, PFI31113_04736	PHO31112_03859, PHO31112_05144	PIN31009_01684, PIN31009_03816	PIN31115_01866, PIN31115_04078	PMO31116_00045, PMO31116_04055	cp013480_pro_2673, cp013480_pro_3530	PNO31109_00978, PNO31109_04082	cp011253_pro_1444, cp011253_pro_2173	PPN31114_01012, PPN31114_01807	cp006900_pro_2097, cp006900_pro_2792
OG0000043	NA	PAN31117_00408, PAN31117_04480	PAN31108_01343	cp011501_pro_3418, cp011501_pro_818	cp013481_pro_1575, cp013481_pro_4223	cp014018_pro_1230, cp014018_pro_3843	PAP18089_00853, PAP18089_02971	rhsh01000002_pro_238, rhsh01000003_pro_93	rhsg01000003_pro_239, rhsg01000006_pro_92	rwhx01000026_pro_38, rwhx01000029_pro_59	pyya01000007_pro_58, pyya01000019_pro_66	rzmt01000017_pro_23, rzmt01000030_pro_4	rzmu01000025_pro_5, rzmu01000028_pro_23	rwhw01000021_pro_58, rwhw01000023_pro_32, rwhw01000115_pro_3	nbta01000008_pro_421, nbta01000010_pro_153, nbta01000013_pro_197	rses01000025_pro_23, rses01000031_pro_58	rzmv01000016_pro_23, rzmv01000031_pro_5	rqxy01000030_pro_58, rqxy01000033_pro_23	rser01000037_pro_23, rser01000047_pro_30	rrcr01000030_pro_5, rrcr01000032_pro_23	rwhv01000025_pro_5, rwhv01000030_pro_23	cp011279_pro_1782, cp011279_pro_3886	cp010518_pro_1781, cp010518_pro_3869	PAQ31011_01808, PAQ31011_03584	PBR20603_00224, PBR20603_04164	maos01000001_pro_289, maos01000083_pro_51	PCA20602_02125, PCA20602_04997	PCA31118_01839, PCA31118_05249	B6_02603	PCE31106_01456	PCE31107_03387	PCO31010_03573, PCO31010_04412	PCO31110_00402, PCO31110_03858	PCO31111_00226, PCO31111_03866	kb944444_pro_27, kb944454_pro_404	PEP31012_03767	cp011807_pro_3026, cp011807_pro_578	jtcr01000010_pro_80, jtcr01000031_pro_76	jtcs01000025_pro_84, jtcs01000038_pro_15	PFI31113_01565, PFI31113_04540	PHO31112_02307, PHO31112_04079	PIN31009_00771, PIN31009_04233	PIN31115_00946, PIN31115_03204	PMO31116_01025, PMO31116_02079	cp013480_pro_1363, cp013480_pro_670	PNO31109_00222, PNO31109_01762	cp011253_pro_3284, cp011253_pro_607	PPN31114_02762, PPN31114_04282	cp006900_pro_1174, cp006900_pro_325, cp006900_pro_3494
OG0000044	NA	PAN31117_00665, PAN31117_04201, PAN31117_05336	PAN31108_00146, PAN31108_04911, PAN31108_05208	cp011501_pro_2628, cp011501_pro_3228	cp013481_pro_2623, cp013481_pro_3163	cp014018_pro_3030, cp014018_pro_3555	PAP18089_04285, PAP18089_04710	rhsh01000001_pro_177, rhsh01000015_pro_19	rhsg01000001_pro_217, rhsg01000015_pro_19	rwhx01000002_pro_106, rwhx01000012_pro_69	pyya01000004_pro_108, pyya01000016_pro_69	rzmt01000006_pro_41, rzmt01000013_pro_69	rzmu01000002_pro_140, rzmu01000033_pro_22	rwhw01000001_pro_122, rwhw01000038_pro_20	nbta01000017_pro_19, nbta01000023_pro_176	rses01000004_pro_36, rses01000017_pro_63	rzmv01000003_pro_120, rzmv01000039_pro_22	rqxy01000016_pro_48, rqxy01000041_pro_22	rser01000002_pro_120, rser01000015_pro_62	rrcr01000002_pro_140, rrcr01000042_pro_22	rwhv01000004_pro_104, rwhv01000040_pro_20	cp011279_pro_1592, cp011279_pro_992	cp010518_pro_1591, cp010518_pro_992	PAQ31011_00280, PAQ31011_00393, PAQ31011_02891, PAQ31011_04911	NA	maos01000024_pro_31, maos01000026_pro_17, maos01000039_pro_196, maos01000061_pro_150	PCA20602_00018, PCA20602_01040, PCA20602_04260	PCA31118_00146, PCA31118_00758, PCA31118_03978	B6_03648	PCE31106_04389	NA	PCO31010_00402, PCO31010_01146, PCO31010_02135	PCO31110_01281, PCO31110_02028	PCO31111_03986	kb944426_pro_171, kb944435_pro_7	NA	cp011807_pro_2237, cp011807_pro_2729	jtcr01000004_pro_129, jtcr01000020_pro_17	jtcs01000003_pro_35, jtcs01000014_pro_17	PFI31113_00471, PFI31113_03499	PHO31112_00836, PHO31112_03746	PIN31009_02659, PIN31009_03375	PIN31115_02986, PIN31115_03635	PMO31116_00297, PMO31116_02766	cp013480_pro_1576, cp013480_pro_2173	PNO31109_00824, PNO31109_03614	cp011253_pro_2458, cp011253_pro_3062, cp011253_pro_3560	PPN31114_00561, PPN31114_04074	cp006900_pro_1398, cp006900_pro_1894
OG0000045	NA	PAN31117_00162, PAN31117_04411	PAN31108_00736, PAN31108_01414	cp011501_pro_3356, cp011501_pro_607	cp013481_pro_1640, cp013481_pro_4440	cp014018_pro_1014, cp014018_pro_3780	PAP18089_00632, PAP18089_03036	rhsh01000002_pro_20, rhsh01000003_pro_27	rhsg01000003_pro_20, rhsg01000006_pro_27	rwhx01000004_pro_11, rwhx01000048_pro_1	pyya01000002_pro_204, pyya01000019_pro_1	rzmt01000003_pro_108, rzmt01000017_pro_88	rzmu01000003_pro_108, rzmu01000040_pro_1	rwhw01000003_pro_31, rwhw01000047_pro_1	nbta01000008_pro_202, nbta01000013_pro_261	rses01000003_pro_65, rses01000050_pro_1	rzmv01000001_pro_202, rzmv01000016_pro_88	rqxy01000002_pro_65, rqxy01000050_pro_28	rser01000001_pro_108, rser01000040_pro_37	rrcr01000001_pro_108, rrcr01000045_pro_34	rwhv01000001_pro_19, rwhv01000049_pro_1	cp011279_pro_1720, cp011279_pro_3675	cp010518_pro_1719, cp010518_pro_3658	PAQ31011_01554, PAQ31011_03514	PBR20603_00451, PBR20603_04238	maos01000043_pro_55, maos01000083_pro_118	PCA20602_01819, PCA20602_02054	PCA31118_01539, PCA31118_04606	B6_01412, B6_04243	PCE31106_00355, PCE31106_01389	PCE31107_00468, PCE31107_03456	PCO31010_01960, PCO31010_04906	PCO31110_00627, PCO31110_03941	PCO31111_00447, PCO31111_03798	kb944444_pro_108, kb944454_pro_629	PEP31012_01349, PEP31012_03832	cp011807_pro_2960, cp011807_pro_341	jtcr01000010_pro_12, jtcr01000018_pro_183	jtcs01000016_pro_183, jtcs01000025_pro_152	PFI31113_01801, PFI31113_04936	PHO31112_00234	PIN31009_00508, PIN31009_03240	PIN31115_00687, PIN31115_03129	PMO31116_01239, PMO31116_02013	cp013480_pro_1434, cp013480_pro_393	PNO31109_00451, PNO31109_01697	cp011253_pro_3219, cp011253_pro_358	PPN31114_02511, PPN31114_04216	cp006900_pro_1230, cp006900_pro_3703
OG0000046	NA	PAN31117_02532, PAN31117_03770	PAN31108_04218, PAN31108_05109	cp011501_pro_1627, cp011501_pro_2123	cp013481_pro_2224, cp013481_pro_3379	cp014018_pro_2060, cp014018_pro_2579	PAP18089_04380, PAP18089_05179	rhsh01000004_pro_349, rhsh01000024_pro_9	rhsg01000002_pro_460, rhsg01000020_pro_9	rwhx01000024_pro_49, rwhx01000071_pro_19	pyya01000001_pro_510, pyya01000036_pro_8	rzmt01000001_pro_268, rzmt01000036_pro_40	rzmu01000001_pro_441, rzmu01000032_pro_8	rwhw01000035_pro_8, rwhw01000040_pro_19	nbta01000014_pro_275, nbta01000022_pro_105	rses01000030_pro_50, rses01000037_pro_8	rzmv01000002_pro_270, rzmv01000038_pro_8	rqxy01000039_pro_8, rqxy01000064_pro_9	rser01000003_pro_177, rser01000003_pro_178, rser01000038_pro_8	rrcr01000039_pro_8, rrcr01000061_pro_9	rwhv01000039_pro_8, rwhv01000079_pro_1	cp011279_pro_4682, cp011279_pro_486	cp010518_pro_4667, cp010518_pro_486	PAQ31011_03886, PAQ31011_04361	PBR20603_03237, PBR20603_04783	maos01000050_pro_8, maos01000064_pro_19	PCA20602_03290, PCA20602_05041	PCA31118_03301, PCA31118_03761	B6_01733, B6_01958	PCE31106_02719, PCE31106_02939	PCE31107_02608, PCE31107_04542	PCO31010_03935, PCO31010_05324	PCO31110_02719, PCO31110_05048	PCO31111_02319, PCO31111_04422	kb944423_pro_186, kb944458_pro_9	PEP31012_02940, PEP31012_03528	cp011807_pro_1301, cp011807_pro_1809	jtcr01000016_pro_48, jtcr01000021_pro_49	jtcs01000017_pro_91, jtcs01000045_pro_10	PFI31113_02738, PFI31113_03870	PHO31112_01244, PHO31112_02645	PIN31009_01626, PIN31009_03567	PIN31115_01808, PIN31115_05054	PMO31116_03330, PMO31116_03884	cp013480_pro_3005, cp013480_pro_3589	PNO31109_02673	cp011253_pro_1390, cp011253_pro_1933	PPN31114_01250, PPN31114_04983	cp006900_pro_2307, cp006900_pro_2837
OG0000047	NA	PAN31117_04045, PAN31117_04753	PAN31108_01733, PAN31108_04569, PAN31108_04570	NA	cp013481_pro_1904, cp013481_pro_3960	cp014018_pro_1491, cp014018_pro_2282	PAP18089_01194, PAP18089_04992	rhsh01000004_pro_50, rhsh01000020_pro_75	rhsg01000002_pro_161, rhsg01000018_pro_75	rwhx01000005_pro_144, rwhx01000045_pro_29	pyya01000001_pro_212, pyya01000031_pro_41	rzmt01000019_pro_58, rzmt01000032_pro_29	rzmu01000001_pro_144, rzmu01000041_pro_29	rwhw01000005_pro_127, rwhw01000050_pro_29	nbta01000005_pro_31, nbta01000022_pro_471	rses01000001_pro_60, rses01000049_pro_29	rzmv01000023_pro_58, rzmv01000050_pro_8	rqxy01000037_pro_33, rqxy01000059_pro_9	rser01000004_pro_116, rser01000030_pro_27	rrcr01000006_pro_60, rrcr01000037_pro_33	rwhv01000017_pro_24, rwhv01000060_pro_29	NA	NA	PAQ31011_02098, PAQ31011_03169	PBR20603_01715, PBR20603_04636	maos01000025_pro_86, maos01000028_pro_86	PCA20602_02415, PCA20602_03244	PCA31118_02767, PCA31118_04876	B6_01234, B6_03339	PCE31106_00843, PCE31106_01879	PCE31107_00937, PCE31107_02435	PCO31010_02796, PCO31010_05217	PCO31110_00122, PCO31110_02401	PCO31111_01813, PCO31111_04273	kb944423_pro_499, kb944454_pro_116	PEP31012_00915, PEP31012_02348, PEP31012_03713	cp011807_pro_1521, cp011807_pro_834	NA	NA	PFI31113_01056, PFI31113_03411	PHO31112_00936, PHO31112_04584	PIN31009_01093, PIN31009_01966	PIN31115_01286, PIN31115_02157, PIN31115_04487	PMO31116_00233, PMO31116_00789, PMO31116_02480	cp013480_pro_3309, cp013480_pro_979	PNO31109_01487, PNO31109_03875	cp011253_pro_1626, cp011253_pro_887	PPN31114_01571, PPN31114_03069	NA
OG0000048	NA	PAN31117_00775, PAN31117_00776	PAN31108_00234, PAN31108_00235	cp011501_pro_2765, cp011501_pro_2766	cp013481_pro_2725, cp013481_pro_2726	cp014018_pro_3133, cp014018_pro_3134	PAP18089_02284, PAP18089_02285	rhsh01000001_pro_74, rhsh01000001_pro_75	rhsg01000001_pro_114, rhsg01000001_pro_115	rwhx01000002_pro_207, rwhx01000002_pro_208	pyya01000027_pro_18, pyya01000027_pro_19	rzmt01000006_pro_142, rzmt01000006_pro_143	rzmu01000002_pro_240, rzmu01000002_pro_241	rwhw01000001_pro_20, rwhw01000001_pro_21	nbta01000023_pro_277, nbta01000023_pro_278	rses01000004_pro_137, rses01000004_pro_138	rzmv01000003_pro_19, rzmv01000003_pro_20	rqxy01000016_pro_20, rqxy01000016_pro_21	rser01000002_pro_20, rser01000002_pro_21	rrcr01000002_pro_167, rrcr01000002_pro_168	rwhv01000014_pro_20, rwhv01000014_pro_21	cp011279_pro_1129, cp011279_pro_1130	cp010518_pro_1129, cp010518_pro_1130	PAQ31011_00513, PAQ31011_00514	NA	maos01000042_pro_29, maos01000042_pro_30	PCA20602_01169, PCA20602_01170	PCA31118_00655, PCA31118_00656	B6_00236, B6_00237	PCE31106_01647, PCE31106_01648	PCE31107_01974, PCE31107_01975	PCO31010_00571, PCO31010_00572	PCO31110_01360, PCO31110_01361	PCO31111_02822, PCO31111_02823	kb944435_pro_77, kb944435_pro_78	PEP31012_01649, PEP31012_01650	cp011807_pro_2335, cp011807_pro_2336	jtcr01000004_pro_212, jtcr01000004_pro_213	jtcs01000003_pro_118, jtcs01000003_pro_119	PFI31113_00379, PFI31113_00380	PHO31112_03662, PHO31112_03663	PIN31009_02782, PIN31009_02783	PIN31115_03507, PIN31115_03508	PMO31116_00374, PMO31116_00375	cp013480_pro_2055, cp013480_pro_2056	PNO31109_00768, PNO31109_00769	cp011253_pro_2567, cp011253_pro_2568	PPN31114_00437, PPN31114_00438	cp006900_pro_1833, cp006900_pro_1834
OG0000049	NA	PAN31117_03230, PAN31117_04584	PAN31108_03041, PAN31108_03561	cp011501_pro_1692, cp011501_pro_3794	cp013481_pro_1210, cp013481_pro_3312	cp014018_pro_2126, cp014018_pro_4212	PAP18089_02123, PAP18089_05254	rhsh01000016_pro_64, rhsh01000028_pro_62	rhsg01000002_pro_2, rhsg01000004_pro_42	rwhx01000010_pro_30, rwhx01000081_pro_11	pyya01000001_pro_3, pyya01000005_pro_71	rzmt01000008_pro_70, rzmt01000059_pro_3	rzmu01000011_pro_22, rzmu01000068_pro_11	rwhw01000031_pro_29, rwhw01000092_pro_11	nbta01000015_pro_2, nbta01000023_pro_544	rses01000009_pro_74, rses01000102_pro_3	rzmv01000011_pro_22, rzmv01000045_pro_3	rqxy01000008_pro_29, rqxy01000102_pro_3	rser01000008_pro_70, rser01000045_pro_2	rrcr01000012_pro_28, rrcr01000087_pro_3	rwhv01000009_pro_71, rwhv01000088_pro_11	cp011279_pro_2158, cp011279_pro_56	cp010518_pro_2157, cp010518_pro_56	PAQ31011_02797, PAQ31011_02967	PBR20603_01521, PBR20603_02382	maos01000027_pro_55, maos01000060_pro_1	PCA20602_00135, PCA20602_02844	PCA31118_04091, PCA31118_04709	B6_00579, B6_00970	PCE31106_01162, PCE31106_03490	PCE31107_01511, PCE31107_04487	PCO31010_02215, PCO31010_03853	PCO31110_02220, PCO31110_03496	PCO31111_01542, PCO31111_03888	kb944439_pro_58, kb944452_pro_114	PEP31012_00230, PEP31012_02177	cp011807_pro_1374, cp011807_pro_3376	jtcr01000009_pro_229, jtcr01000047_pro_3	jtcs01000022_pro_60, jtcs01000040_pro_3	PFI31113_00766, PFI31113_04031	PHO31112_01570, PHO31112_04851	PIN31009_01702, PIN31009_04141	PIN31115_01884, PIN31115_04589	PMO31116_03264, PMO31116_04073	cp013480_pro_3513	PNO31109_01354, PNO31109_03120	cp011253_pro_1461	PPN31114_01790, PPN31114_03241	cp006900_pro_2778
OG0000050	NA	PAN31117_01686, PAN31117_03438	PAN31108_00112, PAN31108_00973	cp011501_pro_1867, cp011501_pro_2602, cp011501_pro_394	cp013481_pro_1934, cp013481_pro_2597, cp013481_pro_4656	cp014018_pro_2312, cp014018_pro_3004, cp014018_pro_793	PAP18089_00412, PAP18089_01224, PAP18089_04684	rhsh01000001_pro_203, rhsh01000004_pro_80, rhsh01000005_pro_44	rhsg01000001_pro_243, rhsg01000002_pro_191, rhsg01000007_pro_44	rwhx01000001_pro_267, rwhx01000002_pro_80, rwhx01000046_pro_20	pyya01000001_pro_242, pyya01000004_pro_82, pyya01000020_pro_16	rzmt01000001_pro_1, rzmt01000002_pro_259, rzmt01000006_pro_15	rzmu01000001_pro_174, rzmu01000002_pro_114, rzmu01000042_pro_15	rwhw01000001_pro_148, rwhw01000002_pro_6, rwhw01000051_pro_21	nbta01000001_pro_69, nbta01000022_pro_441, nbta01000023_pro_150	rses01000001_pro_90, rses01000004_pro_10, rses01000055_pro_21	rzmv01000002_pro_6, rzmv01000003_pro_146, rzmv01000019_pro_15	rqxy01000016_pro_74, rqxy01000032_pro_6	rser01000002_pro_146, rser01000004_pro_86, rser01000018_pro_15	rrcr01000002_pro_114, rrcr01000006_pro_90	rwhv01000004_pro_78, rwhv01000029_pro_6, rwhv01000051_pro_15	cp011279_pro_231, cp011279_pro_3460, cp011279_pro_966	cp010518_pro_231, cp010518_pro_3443, cp010518_pro_966	PAQ31011_00350, PAQ31011_01306	PBR20603_00669, PBR20603_01745	maos01000002_pro_88, maos01000039_pro_155	PCA20602_01001, PCA20602_01560	PCA31118_00789, PCA31118_01284	NA	PCE31106_03947	NA	PCO31010_00362, PCO31010_01699	PCO31110_00840	NA	kb944454_pro_853	NA	cp011807_pro_105, cp011807_pro_2225	jtcr01000002_pro_67, jtcr01000046_pro_30	jtcs01000013_pro_67, jtcs01000018_pro_156	PFI31113_02641, PFI31113_02914	PHO31112_00460, PHO31112_03136	PIN31009_00225, PIN31009_02591, PIN31009_02601, PIN31009_03366	PIN31115_00432, PIN31115_02995, PIN31115_03699, PIN31115_03709	NA	cp013480_pro_138, cp013480_pro_1566, cp013480_pro_2234, cp013480_pro_2242	PNO31109_00841, PNO31109_01914	cp011253_pro_2417, cp011253_pro_92	PPN31114_00608, PPN31114_00618, PPN31114_02242, PPN31114_04084	NA
OG0000051	NA	PAN31117_01914	PAN31108_01928, PAN31108_02669, PAN31108_03459	cp011501_pro_2473	cp013481_pro_2458	cp014018_pro_2864	PAP18089_04050, PAP18089_04139, PAP18089_05313	rhsh01000001_pro_344	rhsg01000001_pro_384	rwhx01000038_pro_15, rwhx01000058_pro_2	pyya01000006_pro_101, pyya01000015_pro_27, pyya01000056_pro_2	rzmt01000037_pro_33, rzmt01000038_pro_2	rzmu01000007_pro_105, rzmu01000007_pro_33, rzmu01000035_pro_19, rzmu01000049_pro_28	rwhw01000041_pro_17, rwhw01000044_pro_20	nbta01000006_pro_2, nbta01000006_pro_83, nbta01000023_pro_42	rses01000038_pro_15, rses01000040_pro_17, rses01000041_pro_2, rses01000128_pro_2, rses01000131_pro_2	rzmv01000026_pro_19, rzmv01000028_pro_33, rzmv01000075_pro_2	rqxy01000040_pro_33, rqxy01000053_pro_13	rser01000006_pro_57, rser01000019_pro_29, rser01000039_pro_15, rser01000043_pro_2	rrcr01000022_pro_41, rrcr01000041_pro_33	rwhv01000005_pro_17, rwhv01000044_pro_41, rwhv01000082_pro_15	cp011279_pro_837	cp010518_pro_837	PAQ31011_00112, PAQ31011_01979, PAQ31011_03826	PBR20603_00969	maos01000001_pro_123, maos01000038_pro_96, maos01000052_pro_5	PCA20602_00356, PCA20602_00831, PCA20602_03105, PCA20602_04892	PCA31118_00973	B6_00537, B6_02739, B6_02860, B6_02923	PCE31106_03105, PCE31106_03156, PCE31106_03532, PCE31106_04451, PCE31106_04622	PCE31107_02179, PCE31107_04443	PCO31010_00108	PCO31110_00407, PCO31110_04467	PCO31111_02162	kb944424_pro_110, kb944454_pro_409	PEP31012_04152, PEP31012_04204, PEP31012_04487	cp011807_pro_2083, cp011807_pro_567	NA	NA	PFI31113_00656	PHO31112_03799	PIN31009_00947, PIN31009_02274, PIN31009_02466	PIN31115_01141, PIN31115_03834, PIN31115_04010	PMO31116_00102	cp013480_pro_2356, cp013480_pro_844	NA	cp011253_pro_2234	PPN31114_00714, PPN31114_00950	cp006900_pro_3506
OG0000052	NA	PAN31117_02907, PAN31117_03175	PAN31108_03615	cp011501_pro_1330, cp011501_pro_1722	cp013481_pro_3279, cp013481_pro_3724	cp014018_pro_1734, cp014018_pro_2159	PAP18089_03535, PAP18089_05217	rhsh01000013_pro_6, rhsh01000028_pro_31	rhsg01000002_pro_34, rhsg01000008_pro_147	rwhx01000005_pro_17, rwhx01000040_pro_44	pyya01000001_pro_87, pyya01000013_pro_105	rzmt01000011_pro_7, rzmt01000020_pro_17	rzmu01000001_pro_17, rzmu01000013_pro_105	rwhw01000039_pro_44, rwhw01000094_pro_11	nbta01000010_pro_228, nbta01000015_pro_34	rses01000021_pro_10, rses01000034_pro_7	rzmv01000012_pro_105, rzmv01000022_pro_17	rqxy01000014_pro_99, rqxy01000023_pro_10	rser01000010_pro_103, rser01000026_pro_10	rrcr01000018_pro_10, rrcr01000075_pro_7	rwhv01000018_pro_71, rwhv01000042_pro_7	cp011279_pro_4385, cp011279_pro_86	cp010518_pro_4370, cp010518_pro_86	PAQ31011_03029, PAQ31011_04238	PBR20603_01564, PBR20603_02150	maos01000013_pro_24, maos01000028_pro_209	PCA20602_02921, PCA20602_03909	PCA31118_03180, PCA31118_04749	B6_00524, B6_03794	PCE31106_02041, PCE31106_03538	PCE31107_03168, PCE31107_04437	PCO31010_02668, PCO31010_03344	PCO31110_02252, PCO31110_04958	PCO31111_03734, PCO31111_03921	kb944425_pro_93, kb944439_pro_93	PEP31012_02216, PEP31012_02658	cp011807_pro_1042, cp011807_pro_1417	jtcr01000014_pro_177, jtcr01000017_pro_54	jtcs01000021_pro_54, jtcs01000030_pro_9	PFI31113_00826, PFI31113_02411	PHO31112_00703, PHO31112_04819	PIN31009_01286, PIN31009_01777	PIN31115_01473, PIN31115_01965	PMO31116_02350, PMO31116_02978	cp013480_pro_3443, cp013480_pro_3936	PNO31109_01381, PNO31109_03293	cp011253_pro_1085, cp011253_pro_1511	PPN31114_01731, PPN31114_04670	cp006900_pro_3070
OG0000053	muhy01000001_pro_441	PAN31117_03290	PAN31108_05252	cp011501_pro_1448, cp011501_pro_1635	cp013481_pro_3371, cp013481_pro_3535, cp013481_pro_3619	cp014018_pro_1844, cp014018_pro_2068	PAP18089_03419	rhsh01000012_pro_105, rhsh01000063_pro_1	rhsg01000014_pro_105, rhsg01000050_pro_1	rwhx01000108_pro_1	pyya01000003_pro_119, pyya01000072_pro_1	rzmt01000081_pro_1	rzmu01000085_pro_1	rwhw01000146_pro_1	nbta01000014_pro_283, nbta01000014_pro_91	rses01000125_pro_1	rzmv01000093_pro_1	rqxy01000019_pro_53, rqxy01000111_pro_2	rser01000004_pro_168, rser01000101_pro_1	rrcr01000016_pro_42, rrcr01000104_pro_1	rwhv01000116_pro_1	cp011279_pro_4503, cp011279_pro_4690	cp010518_pro_4488, cp010518_pro_4675	PAQ31011_05304	PBR20603_02022, PBR20603_03810	maos01000022_pro_21, maos01000061_pro_45	PCA20602_05117	PCA31118_03452, PCA31118_05403	B6_02972, B6_04586	PCE31106_04794	PCE31107_02592	PCO31010_03231, PCO31010_03913	PCO31110_00020, PCO31110_05134	PCO31111_02536, PCO31111_04989	kb944425_pro_1, kb944429_pro_155, kb944439_pro_1, kb944454_pro_22, kb944458_pro_1	PEP31012_00155, PEP31012_02128, PEP31012_02856	cp011807_pro_1158, cp011807_pro_1312	jtcr01000028_pro_52, jtcr01000060_pro_12, jtcr01000069_pro_1	jtcs01000023_pro_52, jtcs01000046_pro_1, jtcs01000063_pro_1	PFI31113_02522	PHO31112_05284, PHO31112_05440	PIN31009_01394, PIN31009_01642	PIN31115_01580, PIN31115_01824	PMO31116_00745, PMO31116_04738	cp013480_pro_3572, cp013480_pro_3833	PNO31109_04331	cp011253_pro_1201, cp011253_pro_1404	PPN31114_00776, PPN31114_01849	cp006900_pro_2829, cp006900_pro_2978
OG0000054	NA	PAN31117_01975, PAN31117_03246	PAN31108_02608, PAN31108_04798	cp011501_pro_1675, cp011501_pro_2419	cp013481_pro_3329	cp014018_pro_2109, cp014018_pro_2808	PAP18089_03992, PAP18089_05297	rhsh01000001_pro_400, rhsh01000031_pro_37	rhsg01000001_pro_440, rhsg01000024_pro_37	rwhx01000014_pro_43, rwhx01000034_pro_38	pyya01000023_pro_43, pyya01000033_pro_15	rzmt01000010_pro_43, rzmt01000031_pro_14	rzmu01000017_pro_43, rzmu01000026_pro_14	rwhw01000012_pro_29, rwhw01000034_pro_14	nbta01000006_pro_140, nbta01000014_pro_326	rses01000002_pro_116, rses01000002_pro_41, rses01000039_pro_2	rzmv01000017_pro_39, rzmv01000035_pro_38	rqxy01000018_pro_41, rqxy01000028_pro_14	rser01000023_pro_29, rser01000034_pro_13	rrcr01000014_pro_43, rrcr01000028_pro_14	rwhv01000005_pro_74, rwhv01000043_pro_2	cp011279_pro_39, cp011279_pro_783	cp010518_pro_39, cp010518_pro_783	PAQ31011_00043, PAQ31011_02951	PBR20603_00913, PBR20603_04586	maos01000047_pro_13, maos01000054_pro_9	PCA20602_00770, PCA20602_02827	PCA31118_01043, PCA31118_04997	B6_02692, B6_03476	PCE31106_03059, PCE31106_03473	PCE31107_02225, PCE31107_02553	PCO31010_00047, PCO31010_03870	PCO31110_02202, PCO31110_04410	PCO31111_02110, PCO31111_04712	kb944424_pro_53, kb944439_pro_42	PEP31012_02160, PEP31012_04550	cp011807_pro_1353, cp011807_pro_2018	jtcr01000006_pro_13, jtcr01000037_pro_113	jtcs01000010_pro_9, jtcs01000026_pro_113	PFI31113_00719, PFI31113_04735	PHO31112_03860, PHO31112_05145	PIN31009_01685	PIN31115_01867	PMO31116_00044, PMO31116_04056	cp013480_pro_3529	PNO31109_00979, PNO31109_04081	cp011253_pro_1445, cp011253_pro_2172	PPN31114_01806	cp006900_pro_2098, cp006900_pro_2791
OG0000055	NA	PAN31117_00500, PAN31117_05302	PAN31108_03418, PAN31108_03837	cp011501_pro_4636, cp011501_pro_899	cp013481_pro_281, cp013481_pro_4140	cp014018_pro_1312, cp014018_pro_384	PAP18089_00938, PAP18089_03708	rhsh01000002_pro_318, rhsh01000027_pro_21	rhsg01000003_pro_319, rhsg01000011_pro_21	rwhx01000009_pro_90, rwhx01000050_pro_19	pyya01000024_pro_23, pyya01000042_pro_15	rzmt01000005_pro_22, rzmt01000041_pro_19	rzmu01000005_pro_22, rzmu01000048_pro_19	rwhw01000008_pro_61, rwhw01000061_pro_19	nbta01000009_pro_160, nbta01000021_pro_25	rses01000014_pro_67, rses01000057_pro_19	rzmv01000005_pro_146, rzmv01000048_pro_19	rqxy01000005_pro_90, rqxy01000052_pro_19	rser01000011_pro_23, rser01000054_pro_19	rrcr01000010_pro_22, rrcr01000052_pro_19	rwhv01000008_pro_22, rwhv01000055_pro_19	cp011279_pro_2999, cp011279_pro_3967	cp010518_pro_3001, cp010518_pro_3950	PAQ31011_01897, PAQ31011_04958	PBR20603_00143, PBR20603_03969	maos01000001_pro_194, maos01000055_pro_19	PCA20602_03037, PCA20602_03762	PCA31118_01949, PCA31118_04168	B6_01222	PCE31106_00638	PCE31107_00743	PCO31010_03655, PCO31010_05295	PCO31110_00304	PCO31111_00146	kb944454_pro_304	PEP31012_01082	cp011807_pro_4148, cp011807_pro_658	jtcr01000011_pro_62, jtcr01000045_pro_45	jtcs01000008_pro_62, jtcs01000039_pro_21	PFI31113_01485, PFI31113_04354	PHO31112_02198, PHO31112_03095	PIN31009_00889, PIN31009_05514	PIN31115_01082, PIN31115_05491	PMO31116_00962, PMO31116_03779	cp013480_pro_4947, cp013480_pro_782	PNO31109_00153, PNO31109_04230	cp011253_pro_4423, cp011253_pro_704	PPN31114_02861, PPN31114_05240	cp006900_pro_21, cp006900_pro_3433
OG0000056	NA	PAN31117_00179, PAN31117_03568	PAN31108_00717, PAN31108_01259	cp011501_pro_3505, cp011501_pro_621	cp013481_pro_1485, cp013481_pro_4426	cp014018_pro_1028, cp014018_pro_3935	PAP18089_00648, PAP18089_02828	rhsh01000002_pro_34, rhsh01000003_pro_183	rhsg01000003_pro_34, rhsg01000006_pro_182	rwhx01000016_pro_4, rwhx01000044_pro_17	pyya01000002_pro_218, pyya01000018_pro_80	rzmt01000003_pro_94, rzmt01000007_pro_101	rzmu01000003_pro_94, rzmu01000016_pro_79	rwhw01000003_pro_17, rwhw01000048_pro_17	nbta01000008_pro_217, nbta01000013_pro_102	rses01000003_pro_79, rses01000048_pro_17	rzmv01000001_pro_216, rzmv01000007_pro_67	rqxy01000002_pro_79, rqxy01000015_pro_79	rser01000001_pro_94, rser01000024_pro_51	rrcr01000001_pro_94, rrcr01000047_pro_17	rwhv01000001_pro_5, rwhv01000012_pro_78	cp011279_pro_1869, cp011279_pro_3689	cp010518_pro_1868, cp010518_pro_3672	PAQ31011_01572, PAQ31011_03672	PBR20603_00433, PBR20603_02784	maos01000043_pro_37, maos01000058_pro_3	PCA20602_01838, PCA20602_02211	PCA31118_01555, PCA31118_03026, PCA31118_04378	NA	NA	NA	PCO31010_01979, PCO31010_04324	PCO31110_00610, PCO31110_03768	PCO31111_00431, PCO31111_03330	kb944431_pro_158, kb944454_pro_612	NA	cp011807_pro_3109, cp011807_pro_356	jtcr01000029_pro_18	jtcs01000006_pro_20	PFI31113_01781, PFI31113_04600	PHO31112_00215, PHO31112_04520	PIN31009_00525, PIN31009_03357, PIN31009_04321	PIN31115_00703, PIN31115_03293	PMO31116_01223, PMO31116_02161	cp013480_pro_1277, cp013480_pro_408	PNO31109_00437, PNO31109_01851	cp011253_pro_1880, cp011253_pro_3367, cp011253_pro_375	PPN31114_02528, PPN31114_04090, PPN31114_04378	NA
OG0000057	NA	PAN31117_01984, PAN31117_03545	PAN31108_01280, PAN31108_02599	cp011501_pro_2412, cp011501_pro_3476	cp013481_pro_2441	cp014018_pro_2799, cp014018_pro_3906	PAP18089_02857, PAP18089_03983	rhsh01000001_pro_409, rhsh01000003_pro_154	rhsg01000001_pro_449, rhsg01000006_pro_153	rwhx01000014_pro_34, rwhx01000041_pro_1	pyya01000023_pro_34, pyya01000038_pro_1	rzmt01000007_pro_130, rzmt01000010_pro_34	rzmu01000017_pro_34	rwhw01000012_pro_38	nbta01000006_pro_149, nbta01000013_pro_131	rses01000002_pro_124, rses01000002_pro_33	rzmv01000017_pro_48	rqxy01000018_pro_32	rser01000023_pro_39	rrcr01000014_pro_34	rwhv01000005_pro_84	cp011279_pro_1840, cp011279_pro_776	cp010518_pro_1839, cp010518_pro_776	PAQ31011_00034, PAQ31011_03648	PBR20603_00904, PBR20603_02810, PBR20603_04456	maos01000039_pro_48, maos01000054_pro_18, maos01000058_pro_27	PCA20602_00761, PCA20602_02188	PCA31118_01052, PCA31118_04358	B6_02659	PCE31106_02427	PCE31107_03330	PCO31010_00037, PCO31010_04347	PCO31110_04401	PCO31111_02101	kb944424_pro_44	PEP31012_04417	cp011807_pro_3091	jtcr01000037_pro_107	jtcs01000026_pro_107	PFI31113_00728, PFI31113_04619	PHO31112_03869	PIN31009_03808, PIN31009_04300, PIN31009_05265	PIN31115_03272, PIN31115_04086, PIN31115_04650	PMO31116_00035, PMO31116_02144	cp013480_pro_1298, cp013480_pro_2681, cp013480_pro_4088	PNO31109_01825, PNO31109_04185	cp011253_pro_2163, cp011253_pro_3348	PPN31114_01020, PPN31114_03178, PPN31114_04355	cp006900_pro_1118, cp006900_pro_2105
OG0000058	NA	PAN31117_02474, PAN31117_04539	PAN31108_03089, PAN31108_03090, PAN31108_04168	cp011501_pro_1583, cp011501_pro_3834	cp013481_pro_1169, cp013481_pro_3424	cp014018_pro_2015, cp014018_pro_4256	PAP18089_02079, PAP18089_05133	rhsh01000016_pro_20, rhsh01000024_pro_54	rhsg01000004_pro_86, rhsg01000020_pro_54	rwhx01000024_pro_3, rwhx01000043_pro_27	pyya01000005_pro_27, pyya01000053_pro_3	rzmt01000008_pro_27, rzmt01000052_pro_3	rzmu01000034_pro_22, rzmu01000057_pro_3	rwhw01000036_pro_34, rwhw01000085_pro_6	nbta01000014_pro_231, nbta01000023_pro_588	rses01000047_pro_27, rses01000069_pro_3	rzmv01000044_pro_16, rzmv01000066_pro_7	rqxy01000046_pro_27, rqxy01000069_pro_7	rser01000008_pro_27, rser01000070_pro_3	rrcr01000046_pro_27, rrcr01000071_pro_3	rwhv01000050_pro_27, rwhv01000072_pro_3	cp011279_pro_2198, cp011279_pro_4638	cp010518_pro_2197, cp010518_pro_4623	PAQ31011_02748, PAQ31011_03941	PBR20603_02426, PBR20603_03185	maos01000027_pro_8, maos01000028_pro_264, maos01000050_pro_78	PCA20602_00185, PCA20602_02874, PCA20602_03357	PCA31118_03350, PCA31118_04135	NA	NA	NA	PCO31010_02264, PCO31010_04024	PCO31110_03450, PCO31110_05097	PCO31111_01583, PCO31111_02366	kb944452_pro_160, kb944458_pro_55	NA	cp011807_pro_1261, cp011807_pro_3417	jtcr01000002_pro_99, jtcr01000009_pro_190	jtcs01000013_pro_99, jtcs01000022_pro_99	PFI31113_02678, PFI31113_04076	PHO31112_01523, PHO31112_02692, PHO31112_03242	PIN31009_01578, PIN31009_02408, PIN31009_04095	PIN31115_01760, PIN31115_03892, PIN31115_04546	PMO31116_03832	cp013480_pro_2414, cp013480_pro_3637, cp013480_pro_4188	PNO31109_02949, PNO31109_03072	cp011253_pro_1340, cp011253_pro_3678	PPN31114_03285, PPN31114_04931	cp006900_pro_2881
OG0000059	NA	PAN31117_03549	PAN31108_01276, PAN31108_03386	cp011501_pro_3110, cp011501_pro_3489	cp013481_pro_1501, cp013481_pro_3042	cp014018_pro_3436, cp014018_pro_3919	PAP18089_02613, PAP18089_02844	rhsh01000003_pro_167, rhsh01000034_pro_25	rhsg01000006_pro_166, rhsg01000013_pro_107	rwhx01000044_pro_33, rwhx01000052_pro_17	pyya01000009_pro_17, pyya01000018_pro_96	rzmt01000007_pro_117, rzmt01000043_pro_16	rzmu01000016_pro_95, rzmu01000044_pro_17	rwhw01000048_pro_33, rwhw01000056_pro_17	nbta01000013_pro_118, nbta01000020_pro_16	rses01000048_pro_33, rses01000052_pro_16	rzmv01000007_pro_51, rzmv01000008_pro_17	rqxy01000015_pro_95, rqxy01000056_pro_16	rser01000024_pro_67, rser01000048_pro_17	rrcr01000004_pro_123, rrcr01000047_pro_33	rwhv01000003_pro_17	cp011279_pro_1474, cp011279_pro_1853	cp010518_pro_1473, cp010518_pro_1852	PAQ31011_00275, PAQ31011_03653	PBR20603_02797, PBR20603_03372	maos01000024_pro_17, maos01000050_pro_182, maos01000058_pro_20	PCA20602_00560, PCA20602_02194, PCA20602_04399	PCA31118_04362	B6_03738	PCE31106_02431, PCE31106_04204	PCE31107_03326	PCO31010_00294, PCO31010_04117, PCO31010_04118, PCO31010_04343	PCO31110_00005, PCO31110_03782	PCO31111_03344, PCO31111_04968	kb944431_pro_172, kb944454_pro_7	PEP31012_04413	cp011807_pro_3095	jtcr01000001_pro_49, jtcr01000055_pro_1	jtcs01000025_pro_21, jtcs01000054_pro_1	PFI31113_01400, PFI31113_04615	PHO31112_04505	PIN31009_02354, PIN31009_04304	PIN31115_03276, PIN31115_03945	PMO31116_02859	cp013480_pro_1294	PNO31109_01838, PNO31109_02344, PNO31109_02797	cp011253_pro_3351	PPN31114_04359	cp006900_pro_1115, cp006900_pro_1479
OG0000060	muhy01000001_pro_420	PAN31117_02620, PAN31117_02946	PAN31108_01595, PAN31108_02486	cp011501_pro_1293, cp011501_pro_1966	cp013481_pro_2035	cp014018_pro_1696, cp014018_pro_2416	PAP18089_01484, PAP18089_03574	rhsh01000004_pro_185, rhsh01000010_pro_109	rhsg01000002_pro_296, rhsg01000008_pro_109	rwhx01000001_pro_163, rwhx01000006_pro_108	pyya01000001_pro_347, pyya01000010_pro_109	rzmt01000001_pro_105, rzmt01000009_pro_108	rzmu01000001_pro_278, rzmu01000031_pro_46	rwhw01000002_pro_110, rwhw01000081_pro_3	nbta01000010_pro_109, nbta01000022_pro_339	rses01000001_pro_194, rses01000008_pro_15	rzmv01000002_pro_109, rzmv01000037_pro_46	rqxy01000001_pro_51, rqxy01000009_pro_108	rser01000003_pro_17, rser01000007_pro_104	rrcr01000003_pro_114, rrcr01000007_pro_108	rwhv01000002_pro_50, rwhv01000006_pro_107	cp011279_pro_329, cp011279_pro_4348	cp010518_pro_329, cp010518_pro_4333	PAQ31011_03309, PAQ31011_04199	PBR20603_01848, PBR20603_02189	maos01000105_pro_51	PCA20602_02551, PCA20602_03949	PCA31118_02901, PCA31118_03141	B6_01187, B6_03759	PCE31106_01750, PCE31106_02076	PCE31107_02306, PCE31107_03205	PCO31010_02941, PCO31010_03384	PCO31110_02540	PCO31111_01942	kb944423_pro_371	PEP31012_02481, PEP31012_02624	cp011807_pro_1653	jtcr01000012_pro_52, jtcr01000043_pro_14	jtcs01000007_pro_49, jtcs01000057_pro_3	PFI31113_01188, PFI31113_02372	PHO31112_00663, PHO31112_01071	PIN31009_01248, PIN31009_02108	PIN31115_01435, PIN31115_02299	PMO31116_02622, PMO31116_03016	cp013480_pro_3168	PNO31109_01620, PNO31109_03252	cp011253_pro_1759	PPN31114_01428, PPN31114_04631	cp006900_pro_2494, cp006900_pro_3106
OG0000061	NA	PAN31117_02356	PAN31108_00214, PAN31108_04504	cp011501_pro_1497, cp011501_pro_2707	cp013481_pro_2706, cp013481_pro_3572	cp014018_pro_1893, cp014018_pro_3113	PAP18089_02264, PAP18089_04846	rhsh01000001_pro_95, rhsh01000023_pro_48	rhsg01000001_pro_135, rhsg01000019_pro_48	rwhx01000002_pro_187, rwhx01000018_pro_26	pyya01000011_pro_84, pyya01000027_pro_39	rzmt01000006_pro_122, rzmt01000023_pro_44	rzmu01000002_pro_220, rzmu01000010_pro_83	rwhw01000001_pro_41, rwhw01000022_pro_26	nbta01000014_pro_140, nbta01000023_pro_257	rses01000004_pro_117, rses01000027_pro_26	rzmv01000003_pro_40, rzmv01000033_pro_26	rqxy01000007_pro_83	rser01000002_pro_41, rser01000036_pro_25	rrcr01000011_pro_83	rwhv01000014_pro_41, rwhv01000023_pro_26	cp011279_pro_1071, cp011279_pro_4552	cp010518_pro_1071, cp010518_pro_4537	PAQ31011_04056	PBR20603_03112	maos01000036_pro_64, maos01000042_pro_49	PCA20602_01148, PCA20602_03490	PCA31118_03473	B6_03865, B6_03992	PCE31106_00683, PCE31106_03749	PCE31107_00788, PCE31107_04226	PCO31010_03182, PCO31010_03978	PCO31110_01341, PCO31110_04674	PCO31111_02483, PCO31111_02803	kb944429_pro_105, kb944435_pro_58	PEP31012_00112, PEP31012_02813	cp011807_pro_1203	jtcr01000016_pro_9, jtcr01000028_pro_14	jtcs01000023_pro_14, jtcs01000045_pro_49	PFI31113_02574, PFI31113_02696	PHO31112_02820, PHO31112_03682	PIN31009_01445, PIN31009_01522	PIN31115_01631, PIN31115_01704	PMO31116_00749, PMO31116_04260	cp013480_pro_3708, cp013480_pro_3785	PNO31109_03021	cp011253_pro_1251, cp011253_pro_1269	PPN31114_04833	cp006900_pro_2935
OG0000062	NA	PAN31117_00893, PAN31117_01583, PAN31117_04508	PAN31108_00353, PAN31108_01316	cp011501_pro_3442	cp013481_pro_1548	cp014018_pro_3872	PAP18089_02944	rhsh01000003_pro_120	rhsg01000006_pro_119	rwhx01000041_pro_37	pyya01000038_pro_37	rzmt01000007_pro_166	rzmu01000039_pro_36	rwhw01000046_pro_36	nbta01000013_pro_167	rses01000046_pro_36	rzmv01000007_pro_5	rqxy01000019_pro_5	rser01000042_pro_35	rrcr01000016_pro_92	rwhv01000012_pro_96	cp011279_pro_1806	cp010518_pro_1805	PAQ31011_00636, PAQ31011_02654, PAQ31011_03611	PBR20603_00901, PBR20603_02513, PBR20603_02574, PBR20603_02847	maos01000023_pro_95, maos01000029_pro_82, maos01000029_pro_85, maos01000061_pro_55, maos01000083_pro_22	PCA20602_00278, PCA20602_01295, PCA20602_02152, PCA20602_04630	PCA31118_00537, PCA31118_02289, PCA31118_04320	NA	PCE31106_01041	NA	PCO31010_00689, PCO31010_00961, PCO31010_02357, PCO31010_04384	PCO31110_01875, PCO31110_03367, PCO31110_04397	PCO31111_01666, PCO31111_02098	kb944424_pro_41, kb944426_pro_75, kb944452_pro_243	NA	cp011807_pro_3053	jtcr01000001_pro_12, jtcr01000027_pro_38	jtcs01000018_pro_38, jtcs01000025_pro_60	PFI31113_03066, PFI31113_04656	PHO31112_01437, PHO31112_03872, PHO31112_04013	PIN31009_02085, PIN31009_03448, PIN31009_04001, PIN31009_04260	PIN31115_02277, PIN31115_02916, PIN31115_03231, PIN31115_04303	NA	cp013480_pro_1337, cp013480_pro_1649, cp013480_pro_1910, cp013480_pro_3190, cp013480_pro_4280	PNO31109_01788, PNO31109_03275	cp011253_pro_2691, cp011253_pro_3311	PPN31114_01450, PPN31114_01859, PPN31114_03381, PPN31114_04001, PPN31114_04308	NA
OG0000063	NA	PAN31117_00398, PAN31117_00803	PAN31108_00262, PAN31108_03118	cp011501_pro_2790	cp013481_pro_2751	cp014018_pro_3158	PAP18089_02312	rhsh01000001_pro_50	rhsg01000001_pro_90	rwhx01000077_pro_8	pyya01000017_pro_89	rzmt01000014_pro_7	rzmu01000002_pro_267	rwhw01000028_pro_46	nbta01000023_pro_303	rses01000013_pro_90	rzmv01000069_pro_8	rqxy01000012_pro_5	rser01000014_pro_86	rrcr01000017_pro_5	rwhv01000011_pro_90	cp011279_pro_1154	cp010518_pro_1154	PAQ31011_00541, PAQ31011_01798	PBR20603_01041	maos01000001_pro_299, maos01000042_pro_3, maos01000050_pro_170	PCA20602_01196, PCA20602_03424, PCA20602_05006	PCA31118_00627, PCA31118_01832, PCA31118_04924	B6_02950, B6_04508	PCE31106_01621, PCE31106_02361	PCE31107_01948	PCO31010_00599, PCO31010_03563	PCO31110_01388, PCO31110_01840	PCO31111_01020, PCO31111_02850, PCO31111_04577	kb944426_pro_39, kb944435_pro_104	PEP31012_01677	cp011807_pro_2363, cp011807_pro_571	jtcr01000004_pro_235, jtcr01000031_pro_69	jtcs01000003_pro_141, jtcs01000038_pro_22	PFI31113_00352, PFI31113_01572	PHO31112_03635	PIN31009_02381, PIN31009_02856	PIN31115_03478, PIN31115_03919	PMO31116_00401	cp013480_pro_2027, cp013480_pro_2440	PNO31109_00230, PNO31109_00744	cp011253_pro_2588, cp011253_pro_600	PPN31114_00408, PPN31114_04904	cp006900_pro_1811
OG0000064	NA	NA	PAN31108_01358, PAN31108_01788, PAN31108_02159, PAN31108_04849	cp011501_pro_1395, cp011501_pro_2199, cp011501_pro_4127	cp013481_pro_1848, cp013481_pro_1849, cp013481_pro_869	cp014018_pro_1913	PAP18089_01136, PAP18089_01137, PAP18089_03076	rhsh01000032_pro_43, rhsh01000032_pro_44	rhsg01000002_pro_106, rhsg01000002_pro_107	rwhx01000005_pro_88, rwhx01000005_pro_89, rwhx01000020_pro_18, rwhx01000023_pro_45	pyya01000001_pro_157, pyya01000001_pro_158, pyya01000022_pro_76, pyya01000028_pro_46	rzmt01000001_pro_421, rzmt01000004_pro_77, rzmt01000019_pro_2, rzmt01000019_pro_3	rzmu01000001_pro_88, rzmu01000001_pro_89, rzmu01000008_pro_77, rzmu01000023_pro_45	rwhw01000005_pro_71, rwhw01000005_pro_72	nbta01000004_pro_364, nbta01000022_pro_18, nbta01000022_pro_525, nbta01000022_pro_526	rses01000001_pro_4, rses01000001_pro_5, rses01000006_pro_58, rses01000042_pro_15	rzmv01000004_pro_134, rzmv01000009_pro_58, rzmv01000023_pro_2, rzmv01000023_pro_3	rqxy01000003_pro_77, rqxy01000034_pro_30, rqxy01000038_pro_47, rqxy01000038_pro_48	rser01000009_pro_66, rser01000050_pro_4, rser01000050_pro_5, rser01000052_pro_2	rrcr01000006_pro_4, rrcr01000006_pro_5, rrcr01000008_pro_58, rrcr01000021_pro_45	rwhv01000017_pro_79, rwhv01000017_pro_80, rwhv01000021_pro_45, rwhv01000064_pro_30	cp011279_pro_2491, cp011279_pro_4450, cp011279_pro_562	cp010518_pro_2490, cp010518_pro_4435, cp010518_pro_562	NA	PBR20603_02367, PBR20603_03854, PBR20603_04102, PBR20603_04103	maos01000013_pro_88	NA	PCA31118_02442, PCA31118_04662	B6_01314, B6_02470	PCE31106_04196, PCE31106_04218	PCE31107_02828, PCE31107_04210	PCO31010_04566, PCO31010_04848	PCO31110_02901	PCO31111_01431, PCO31111_02576, PCO31111_02612, PCO31111_03420, PCO31111_03514	NA	PEP31012_00553	NA	NA	NA	NA	PHO31112_02898, PHO31112_04656	PIN31009_01910, PIN31009_05528	PIN31115_02101, PIN31115_03041, PIN31115_05231	PMO31116_02678, PMO31116_03486	cp013480_pro_2918	PNO31109_01129	NA	NA	cp006900_pro_2167
OG0000065	NA	PAN31117_01941, PAN31117_01942	PAN31108_02642, PAN31108_02643	cp011501_pro_2451, cp011501_pro_2452	NA	cp014018_pro_2840, cp014018_pro_2841	PAP18089_04025, PAP18089_04026	rhsh01000001_pro_367, rhsh01000001_pro_368	rhsg01000001_pro_407, rhsg01000001_pro_408	rwhx01000014_pro_76, rwhx01000014_pro_77	pyya01000015_pro_3, pyya01000015_pro_4	rzmt01000010_pro_76, rzmt01000010_pro_77	rzmu01000017_pro_76, rzmu01000017_pro_77	rwhw01000102_pro_1, rwhw01000108_pro_1, rwhw01000108_pro_2	nbta01000006_pro_107, nbta01000006_pro_108	rses01000002_pro_74, rses01000002_pro_75, rses01000002_pro_82, rses01000002_pro_83	rzmv01000017_pro_5, rzmv01000017_pro_6	rqxy01000018_pro_74, rqxy01000018_pro_75	rser01000019_pro_5, rser01000019_pro_6	rrcr01000014_pro_76, rrcr01000014_pro_77	rwhv01000005_pro_40, rwhv01000005_pro_41	cp011279_pro_815, cp011279_pro_816	cp010518_pro_815, cp010518_pro_816	PAQ31011_00084, PAQ31011_00085	PBR20603_00944, PBR20603_00945	maos01000046_pro_25, maos01000046_pro_26	PCA20602_00803, PCA20602_00804	PCA31118_01000	B6_02720	PCE31106_03086	PCE31107_02198	PCO31010_00080, PCO31010_00081	PCO31110_04443, PCO31110_04444	PCO31111_02145	kb944424_pro_86, kb944424_pro_87	PEP31012_04136	cp011807_pro_2056, cp011807_pro_2057	jtcr01000037_pro_142, jtcr01000037_pro_143	jtcs01000026_pro_142, jtcs01000026_pro_143	PFI31113_00684, PFI31113_00685	PHO31112_03825, PHO31112_03826	PIN31009_03856, PIN31009_03857	PIN31115_04037, PIN31115_04038	PMO31116_00078	cp013480_pro_2577, cp013480_pro_2578	PNO31109_00948	cp011253_pro_2207, cp011253_pro_2208	PPN31114_00974, PPN31114_00975	cp006900_pro_2072
OG0000066	NA	PAN31117_00692, PAN31117_01763	NA	cp011501_pro_2559, cp011501_pro_2653	cp013481_pro_2546, cp013481_pro_2649	cp014018_pro_2953, cp014018_pro_3056	PAP18089_04632, PAP18089_04736	rhsh01000001_pro_151, rhsh01000001_pro_254	rhsg01000001_pro_191, rhsg01000001_pro_294	rwhx01000002_pro_132, rwhx01000002_pro_33	pyya01000004_pro_134, pyya01000004_pro_35	rzmt01000006_pro_67, rzmt01000025_pro_34	rzmu01000002_pro_166, rzmu01000002_pro_67	rwhw01000001_pro_195, rwhw01000001_pro_96	nbta01000023_pro_202, nbta01000023_pro_99	rses01000004_pro_62, rses01000023_pro_37	rzmv01000003_pro_193, rzmv01000003_pro_94	rqxy01000013_pro_67	rser01000002_pro_190, rser01000002_pro_95	rrcr01000002_pro_67	rwhv01000004_pro_130, rwhv01000004_pro_31	cp011279_pro_1017, cp011279_pro_923	cp010518_pro_1017, cp010518_pro_923	PAQ31011_00421	NA	maos01000034_pro_68	PCA20602_01067, PCA20602_04929	PCA31118_00729	B6_00184, B6_02823, B6_02845	PCE31106_04468, PCE31106_04524	PCE31107_02020, PCE31107_02074, PCE31107_02096	PCO31010_00242, PCO31010_00431	PCO31110_04557, PCO31110_04577	PCO31111_02264, PCO31111_02282	kb944443_pro_29, kb944443_pro_52	PEP31012_01609, PEP31012_03917, PEP31012_03938	cp011807_pro_2266	jtcr01000004_pro_153	jtcs01000003_pro_59	PFI31113_00444	PHO31112_03184, PHO31112_03202	PIN31009_02686	PIN31115_03608	PMO31116_00213, PMO31116_00324	cp013480_pro_2146	PNO31109_00813	cp011253_pro_2486	PPN31114_00533	cp006900_pro_1871, cp006900_pro_1970
OG0000067	NA	PAN31117_01955, PAN31117_04146, PAN31117_05055, PAN31117_05056	PAN31108_02631	cp011501_pro_1524, cp011501_pro_2440	cp013481_pro_3487	cp014018_pro_1952, cp014018_pro_2829	PAP18089_04013, PAP18089_04818	rhsh01000001_pro_379, rhsh01000012_pro_57	rhsg01000001_pro_419, rhsg01000014_pro_57	rwhx01000014_pro_65, rwhx01000018_pro_53	pyya01000011_pro_57, pyya01000023_pro_64	rzmt01000010_pro_65, rzmt01000023_pro_17	rzmu01000010_pro_56, rzmu01000017_pro_65	rwhw01000012_pro_7, rwhw01000060_pro_28	nbta01000006_pro_119, nbta01000014_pro_167	rses01000002_pro_63, rses01000002_pro_94, rses01000027_pro_53, rses01000032_pro_55	rzmv01000017_pro_17, rzmv01000030_pro_55	rqxy01000007_pro_56, rqxy01000018_pro_63	rser01000023_pro_7, rser01000031_pro_53	rrcr01000011_pro_56, rrcr01000014_pro_65	rwhv01000005_pro_52, rwhv01000023_pro_52	cp011279_pro_4579, cp011279_pro_804	cp010518_pro_4564, cp010518_pro_804	PAQ31011_00069, PAQ31011_00631	NA	maos01000046_pro_13, maos01000051_pro_1	PCA20602_00790	PCA31118_00420, PCA31118_01013	NA	NA	NA	PCO31010_00067	PCO31110_04431	PCO31111_02131	kb944424_pro_74	NA	cp011807_pro_2044, cp011807_pro_2117	jtcr01000007_pro_1, jtcr01000037_pro_133	jtcs01000002_pro_34, jtcs01000026_pro_133	PFI31113_00698	PHO31112_03839	PIN31009_01733, PIN31009_03842, PIN31009_05102, PIN31009_05344, PIN31009_05345	PIN31115_01921, PIN31115_04052	PMO31116_00064, PMO31116_03812	cp013480_pro_2593, cp013480_pro_3482, cp013480_pro_4832	PNO31109_00960, PNO31109_03916	cp011253_pro_2193, cp011253_pro_2194, cp011253_pro_4466	PPN31114_00269, PPN31114_00989	cp006900_pro_2080, cp006900_pro_2905
OG0000068	muhy01000001_pro_522	PAN31117_03232, PAN31117_04016	NA	cp011501_pro_1069, cp011501_pro_1690	cp013481_pro_3314, cp013481_pro_3988	cp014018_pro_1462, cp014018_pro_2124	PAP18089_01089	rhsh01000071_pro_1	rhsg01000062_pro_2	rwhx01000028_pro_60, rwhx01000112_pro_1	pyya01000075_pro_1	rzmt01000087_pro_2	rzmu01000005_pro_171, rzmu01000090_pro_1	rwhw01000156_pro_2	nbta01000005_pro_2	rses01000135_pro_2	rzmv01000097_pro_2	rqxy01000027_pro_60, rqxy01000117_pro_2	rser01000104_pro_2, rser01000112_pro_1	rrcr01000107_pro_2	rwhv01000120_pro_2	cp011279_pro_4137, cp011279_pro_54	cp010518_pro_4121, cp010518_pro_54	PAQ31011_02080, PAQ31011_02965	PBR20603_04601	NA	PCA20602_02842, PCA20602_03216	PCA31118_03443	NA	PCE31106_00814, PCE31106_03488	PCE31107_00908	PCO31010_03855, PCO31010_05245	PCO31110_00151, PCO31110_02218	PCO31111_05129	kb944439_pro_56, kb944454_pro_145, kb944454_pro_147	PEP31012_00944, PEP31012_02175	cp011807_pro_1372, cp011807_pro_806	jtcr01000036_pro_1, jtcr01000047_pro_1	jtcs01000020_pro_37, jtcs01000040_pro_1, jtcs01000065_pro_1	PFI31113_00764	PHO31112_02034, PHO31112_04853	PIN31009_01064, PIN31009_01700, PIN31009_03477	PIN31115_01257, PIN31115_01882, PIN31115_02887	PMO31116_00818, PMO31116_04071	cp013480_pro_3515, cp013480_pro_951	PNO31109_04328	cp011253_pro_1459, cp011253_pro_858	PPN31114_01792, PPN31114_03040	cp006900_pro_2780, cp006900_pro_3287
OG0000069	NA	PAN31117_00024, PAN31117_04139	PAN31108_02076	cp011501_pro_469	cp013481_pro_452, cp013481_pro_4579	cp014018_pro_874	PAP18089_00491	rhsh01000005_pro_124	rhsg01000007_pro_125	rwhx01000004_pro_149	pyya01000002_pro_65	rzmt01000003_pro_246	rzmu01000003_pro_246	rwhw01000003_pro_169	nbta01000008_pro_63	rses01000010_pro_46	rzmv01000001_pro_64	rqxy01000010_pro_46	rser01000001_pro_244	rrcr01000001_pro_245	rwhv01000001_pro_156	cp011279_pro_3536	cp010518_pro_3519	PAQ31011_01393	PBR20603_00586	maos01000024_pro_11, maos01000040_pro_51	PCA20602_01676, PCA20602_04382, PCA20602_04405	PCA31118_01401, PCA31118_01813, PCA31118_03736, PCA31118_03990	B6_01625, B6_02236	PCE31106_00206, PCE31106_03341	PCE31107_00322, PCE31107_02726, PCE31107_04002	PCO31010_01815	PCO31110_00760, PCO31110_04151	PCO31111_00568, PCO31111_02237	kb944454_pro_774	PEP31012_01472, PEP31012_01771, PEP31012_02074	cp011807_pro_216	jtcr01000018_pro_59	jtcs01000016_pro_59	PFI31113_02832	PHO31112_00379, PHO31112_04720	PIN31009_00341	PIN31115_00518	PMO31116_00153, PMO31116_01381	cp013480_pro_226	PNO31109_02278, PNO31109_03924	cp011253_pro_202	PPN31114_02359	cp006900_pro_3833
OG0000070	NA	PAN31117_01826, PAN31117_02351	PAN31108_00094, PAN31108_04509	cp011501_pro_1492	cp013481_pro_3577	cp014018_pro_1888	PAP18089_04851	rhsh01000023_pro_43	rhsg01000019_pro_43	rwhx01000018_pro_21	pyya01000011_pro_89	rzmt01000023_pro_49	rzmu01000010_pro_88	rwhw01000022_pro_21	nbta01000014_pro_135	rses01000027_pro_21	rzmv01000033_pro_31	rqxy01000007_pro_88	rser01000036_pro_30	rrcr01000011_pro_88	rwhv01000023_pro_21	cp011279_pro_4547	cp010518_pro_4532	PAQ31011_04061	PBR20603_03107	maos01000036_pro_69, maos01000050_pro_59	PCA20602_03340, PCA20602_03495	PCA31118_00813, PCA31118_03478	B6_01109, B6_03860, B6_04570	PCE31106_00981, PCE31106_03744	PCE31107_01582, PCE31107_02604, PCE31107_02737, PCE31107_04231, PCE31107_04502, PCE31107_04505	PCO31010_03187	PCO31110_04669	PCO31111_02488	kb944429_pro_110	PEP31012_01833, PEP31012_02808, PEP31012_02944, PEP31012_04655	cp011807_pro_1198	jtcr01000027_pro_40, jtcr01000028_pro_9	jtcs01000023_pro_9	PFI31113_02569	PHO31112_02825	PIN31009_01440, PIN31009_02434, PIN31009_02558	PIN31115_01626, PIN31115_03742, PIN31115_03866	PMO31116_04255	cp013480_pro_2274, cp013480_pro_2388, cp013480_pro_3790	PNO31109_00656, PNO31109_02993, PNO31109_03026	cp011253_pro_1246	PPN31114_00636, PPN31114_00779, PPN31114_00882, PPN31114_04828	cp006900_pro_2939
OG0000071	NA	PAN31117_02132	PAN31108_02228	cp011501_pro_110, cp011501_pro_112	cp013481_pro_150, cp013481_pro_152	cp014018_pro_517, cp014018_pro_519	PAP18089_00118, PAP18089_00120	rhsh01000007_pro_113, rhsh01000007_pro_115	rhsg01000005_pro_113, rhsg01000005_pro_115	rwhx01000022_pro_31, rwhx01000022_pro_33	pyya01000025_pro_45, pyya01000025_pro_47	rzmt01000022_pro_31, rzmt01000022_pro_33	rzmu01000006_pro_112, rzmu01000006_pro_114	rwhw01000016_pro_28, rwhw01000016_pro_30	nbta01000009_pro_295, nbta01000009_pro_297	rses01000022_pro_31, rses01000022_pro_33	rzmv01000006_pro_113, rzmv01000006_pro_115	rqxy01000024_pro_38, rqxy01000024_pro_40	rser01000027_pro_44, rser01000027_pro_46	rrcr01000005_pro_112, rrcr01000005_pro_114	rwhv01000037_pro_10, rwhv01000037_pro_12	cp011279_pro_3128, cp011279_pro_3130	cp010518_pro_3130, cp010518_pro_3132	PAQ31011_04674	PBR20603_02949, PBR20603_02951	maos01000072_pro_69	PCA20602_04143	PCA31118_03624	B6_01824	PCE31106_03916, PCE31106_03917	PCE31107_03912, PCE31107_03913	PCO31010_01411, PCO31010_01412	PCO31110_01150, PCO31110_01151, PCO31110_01153	PCO31111_01265, PCO31111_01267, PCO31111_01268	kb944456_pro_94, kb944456_pro_95, kb944456_pro_96, kb944456_pro_98	PEP31012_03063, PEP31012_03065	cp011807_pro_4282	jtcr01000005_pro_125, jtcr01000005_pro_126, jtcr01000005_pro_128	jtcs01000019_pro_125, jtcs01000019_pro_126, jtcs01000019_pro_128	PFI31113_03192, PFI31113_03194, PFI31113_03195	PHO31112_02449, PHO31112_02451, PHO31112_02452	PIN31009_04848, PIN31009_04849	PIN31115_00109, PIN31115_00110	PMO31116_03617	cp013480_pro_5077	PNO31109_02084	cp011253_pro_4561	PPN31114_01956, PPN31114_01957	cp006900_pro_4150
OG0000072	NA	PAN31117_02237	PAN31108_04408, PAN31108_04977	cp011501_pro_1733, cp011501_pro_208	cp013481_pro_3268, cp013481_pro_50	cp014018_pro_2170, cp014018_pro_620	PAP18089_00221, PAP18089_05206	rhsh01000011_pro_110, rhsh01000028_pro_20	rhsg01000002_pro_45, rhsg01000005_pro_215	rwhx01000005_pro_28, rwhx01000008_pro_8	pyya01000001_pro_98, pyya01000003_pro_71	rzmt01000002_pro_70, rzmt01000020_pro_28	rzmu01000001_pro_28, rzmu01000004_pro_103	rwhw01000005_pro_11, rwhw01000080_pro_7	nbta01000009_pro_398, nbta01000015_pro_45	rses01000005_pro_35, rses01000021_pro_21	rzmv01000010_pro_103, rzmv01000022_pro_28	rqxy01000004_pro_8, rqxy01000023_pro_21	rser01000022_pro_17, rser01000026_pro_21	rrcr01000009_pro_8, rrcr01000018_pro_21	rwhv01000007_pro_8, rwhv01000018_pro_60	cp011279_pro_3226, cp011279_pro_97	cp010518_pro_3228, cp010518_pro_97	PAQ31011_01140	PBR20603_00801, PBR20603_00859, PBR20603_01575	maos01000022_pro_75	PCA20602_01393	PCA31118_01093	B6_02069	PCE31106_03287, PCE31106_03549	PCE31107_00030	PCO31010_01521	PCO31110_01047, PCO31110_02263	PCO31111_01373, PCO31111_03932	kb944439_pro_104, kb944459_pro_9	PEP31012_00098, PEP31012_02227, PEP31012_04621	cp011807_pro_4389	jtcr01000005_pro_15, jtcr01000014_pro_167	jtcs01000019_pro_15, jtcs01000030_pro_19	PFI31113_00837, PFI31113_03316	PHO31112_02559, PHO31112_04808	PIN31009_00035	PIN31115_00221	PMO31116_01638, PMO31116_02361	cp013480_pro_5187	PNO31109_02041	cp011253_pro_4669	PPN31114_02065	cp006900_pro_2732, cp006900_pro_4061
OG0000073	NA	PAN31117_02240	PAN31108_04411, PAN31108_04979	cp011501_pro_1731, cp011501_pro_211	cp013481_pro_3270, cp013481_pro_47	cp014018_pro_2168, cp014018_pro_623	PAP18089_00224, PAP18089_05208	rhsh01000011_pro_107, rhsh01000028_pro_22	rhsg01000002_pro_43, rhsg01000005_pro_218	rwhx01000005_pro_26, rwhx01000008_pro_11	pyya01000001_pro_96, pyya01000003_pro_74	rzmt01000002_pro_73, rzmt01000020_pro_26	rzmu01000001_pro_26, rzmu01000004_pro_100	rwhw01000005_pro_9, rwhw01000080_pro_4	nbta01000009_pro_401, nbta01000015_pro_43	rses01000005_pro_38, rses01000021_pro_19	rzmv01000010_pro_100, rzmv01000022_pro_26	rqxy01000004_pro_11, rqxy01000023_pro_19	rser01000022_pro_14, rser01000026_pro_19	rrcr01000009_pro_11, rrcr01000018_pro_19	rwhv01000007_pro_11, rwhv01000018_pro_62	cp011279_pro_3229, cp011279_pro_95	cp010518_pro_3231, cp010518_pro_95	PAQ31011_01143	PBR20603_00799, PBR20603_00856, PBR20603_01573	maos01000022_pro_72	PCA20602_01396	PCA31118_01096	B6_02072	PCE31106_03284, PCE31106_03547	PCE31107_00033	PCO31010_01524	PCO31110_01044, PCO31110_02261	PCO31111_01376, PCO31111_03930	kb944439_pro_102, kb944459_pro_12	PEP31012_00100, PEP31012_02225, PEP31012_04618	cp011807_pro_4392	jtcr01000005_pro_12, jtcr01000014_pro_168	jtcs01000019_pro_12, jtcs01000030_pro_18	PFI31113_00835, PFI31113_03319	PHO31112_02562, PHO31112_04810	PIN31009_00038	PIN31115_00224	PMO31116_01635, PMO31116_02359	cp013480_pro_5190	PNO31109_02038	cp011253_pro_4672	PPN31114_02068	cp006900_pro_2733, cp006900_pro_4058
OG0000074	NA	PAN31117_03334, PAN31117_04200	PAN31108_01071, PAN31108_03109, PAN31108_04912, PAN31108_05168	cp011501_pro_312, cp011501_pro_3229	cp013481_pro_3164, cp013481_pro_4742	cp014018_pro_3556, cp014018_pro_708	PAP18089_00325, PAP18089_04286	rhsh01000011_pro_23, rhsh01000015_pro_20	rhsg01000005_pro_302, rhsg01000015_pro_20	rwhx01000008_pro_93, rwhx01000012_pro_68	pyya01000003_pro_211, pyya01000016_pro_68	rzmt01000002_pro_174, rzmt01000013_pro_68	rzmu01000004_pro_19, rzmu01000033_pro_21	rwhw01000004_pro_71, rwhw01000038_pro_21	nbta01000009_pro_500, nbta01000017_pro_20	rses01000005_pro_120, rses01000017_pro_62	rzmv01000010_pro_19, rzmv01000039_pro_21	rqxy01000004_pro_93, rqxy01000041_pro_21	rser01000015_pro_61, rser01000021_pro_19	rrcr01000009_pro_93, rrcr01000042_pro_21	rwhv01000007_pro_92, rwhv01000040_pro_21	cp011279_pro_1593, cp011279_pro_3378	cp010518_pro_1592, cp010518_pro_3361	PAQ31011_01201, PAQ31011_04910	PBR20603_00759, PBR20603_01471	maos01000041_pro_9, maos01000082_pro_1	PCA20602_01458, PCA20602_04259	PCA31118_00145, PCA31118_01183	B6_00492	PCE31106_03179	PCE31107_00159	PCO31010_01147, PCO31010_01590	PCO31110_00932, PCO31110_02029	PCO31111_00735, PCO31111_04792	kb944426_pro_172, kb944454_pro_944	PEP31012_04368	cp011807_pro_10	jtcr01000027_pro_76	jtcs01000018_pro_76	PFI31113_03001, PFI31113_03500	PHO31112_00552, PHO31112_05272	PIN31009_00123, PIN31009_03374	PIN31115_00330, PIN31115_02987	PMO31116_01570, PMO31116_02765	cp013480_pro_37	PNO31109_01972, PNO31109_03613	cp011253_pro_13, cp011253_pro_3063	PPN31114_02146, PPN31114_04075	cp006900_pro_3998
OG0000075	NA	PAN31117_03790	PAN31108_05129	cp011501_pro_2217	cp013481_pro_2243	cp014018_pro_2598	PAP18089_04400	rhsh01000062_pro_1	rhsg01000002_pro_479	rwhx01000011_pro_105	pyya01000006_pro_157	rzmt01000001_pro_287	rzmu01000012_pro_105	rwhw01000033_pro_43	nbta01000006_pro_350	rses01000011_pro_105	rzmv01000004_pro_1	rqxy01000098_pro_2	rser01000006_pro_1	rrcr01000038_pro_43	rwhv01000038_pro_43	cp011279_pro_580	cp010518_pro_580	PAQ31011_02172, PAQ31011_04381	PBR20603_03381, PBR20603_04809	maos01000025_pro_35, maos01000073_pro_6, maos01000099_pro_2	PCA20602_04877, PCA20602_05061	PCA31118_03781	B6_04630	PCE31106_00732, PCE31106_02707	PCE31107_04054, PCE31107_04527	PCO31010_03107, PCO31010_04668, PCO31010_05157	PCO31110_00975, PCO31110_02743	PCO31111_00773, PCO31111_04445	kb944423_pro_163, kb944454_pro_987	PEP31012_03517	cp011807_pro_1828	jtcr01000007_pro_24, jtcr01000021_pro_66	jtcs01000002_pro_11, jtcs01000017_pro_74	PFI31113_03805, PFI31113_04896	PHO31112_01268, PHO31112_04942	PIN31009_01291, PIN31009_01470, PIN31009_03587	PIN31115_01478, PIN31115_01656, PIN31115_05074	PMO31116_03344, PMO31116_03420	cp013480_pro_2903, cp013480_pro_3760	PNO31109_02512, PNO31109_02654	cp011253_pro_1953	PPN31114_01228, PPN31114_04676	cp006900_pro_2221, cp006900_pro_2290
OG0000076	NA	PAN31117_04503, PAN31117_04504	PAN31108_01320, PAN31108_01321	cp011501_pro_3438	cp013481_pro_1552	cp014018_pro_3867, cp014018_pro_3868	PAP18089_02948	rhsh01000003_pro_116, rhsh01000009_pro_123, rhsh01000009_pro_124	rhsg01000006_pro_115, rhsg01000012_pro_123	rwhx01000041_pro_41, rwhx01000092_pro_1, rwhx01000109_pro_1	pyya01000038_pro_41, pyya01000064_pro_1, pyya01000073_pro_1	rzmt01000007_pro_170, rzmt01000070_pro_1, rzmt01000083_pro_1	rzmu01000039_pro_40, rzmu01000074_pro_1, rzmu01000086_pro_1	rwhw01000046_pro_40, rwhw01000125_pro_1, rwhw01000140_pro_1, rwhw01000152_pro_1	nbta01000013_pro_171, nbta01000013_pro_172, nbta01000013_pro_173	rses01000046_pro_40, rses01000100_pro_1, rses01000130_pro_1	rzmv01000007_pro_1, rzmv01000079_pro_1, rzmv01000094_pro_1	rqxy01000019_pro_1, rqxy01000096_pro_1, rqxy01000114_pro_1	rser01000042_pro_39, rser01000042_pro_40, rser01000081_pro_1, rser01000103_pro_1	rrcr01000016_pro_96, rrcr01000086_pro_1, rrcr01000105_pro_1	rwhv01000012_pro_100, rwhv01000103_pro_1, rwhv01000117_pro_1	cp011279_pro_1802	cp010518_pro_1801	PAQ31011_03606, PAQ31011_03607	PBR20603_04141, PBR20603_04818	maos01000083_pro_26, maos01000083_pro_27	PCA20602_02147, PCA20602_02148	PCA31118_04316, PCA31118_05271, PCA31118_05273	B6_02624	PCE31106_02393, PCE31106_04759, PCE31106_04760	PCE31107_03365, PCE31107_03366	PCO31010_04388, PCO31010_04389	PCO31110_03833, PCO31110_03834, PCO31110_03835	NA	kb944431_pro_223, kb944444_pro_1, kb944444_pro_3, kb944444_pro_4	PEP31012_03747, PEP31012_04672	cp011807_pro_3048, cp011807_pro_3049	jtcr01000001_pro_8	jtcs01000025_pro_64	PFI31113_04980	PHO31112_05398	PIN31009_04256	PIN31115_03227	NA	cp013480_pro_1341	PNO31109_01784	cp011253_pro_3305, cp011253_pro_3307	NA	NA
OG0000077	NA	PAN31117_01700	NA	cp011501_pro_2589, cp011501_pro_3130	cp013481_pro_2583, cp013481_pro_3064	cp014018_pro_2990, cp014018_pro_3456	PAP18089_04181, PAP18089_04669	rhsh01000001_pro_217, rhsh01000017_pro_9	rhsg01000001_pro_257, rhsg01000016_pro_8	rwhx01000002_pro_66, rwhx01000013_pro_8	pyya01000004_pro_68, pyya01000009_pro_41	rzmt01000006_pro_1, rzmt01000015_pro_9, rzmt01000025_pro_1	rzmu01000002_pro_100, rzmu01000015_pro_9	rwhw01000001_pro_162, rwhw01000006_pro_8	nbta01000012_pro_80, nbta01000023_pro_135, nbta01000023_pro_136	rses01000007_pro_27, rses01000023_pro_4	rzmv01000003_pro_160, rzmv01000008_pro_42	rqxy01000006_pro_27, rqxy01000013_pro_100, rqxy01000016_pro_88	rser01000002_pro_160, rser01000013_pro_81	rrcr01000002_pro_100, rrcr01000004_pro_81	rwhv01000003_pro_60, rwhv01000004_pro_64	cp011279_pro_1494, cp011279_pro_953	cp010518_pro_1493, cp010518_pro_953	PAQ31011_00331	NA	maos01000039_pro_141	PCA20602_00986	PCA31118_00804, PCA31118_01902	B6_02780, B6_02872	PCE31106_04441	PCE31107_00112, PCE31107_01577, PCE31107_02123	PCO31010_00343	NA	PCO31111_01010	kb944426_pro_27	PEP31012_01830, PEP31012_03961	cp011807_pro_2213	jtcr01000004_pro_97	jtcs01000003_pro_3	PFI31113_00506	PHO31112_03975	PIN31009_00854	PIN31115_01025	PMO31116_00276, PMO31116_03813	cp013480_pro_746	PNO31109_00850	cp011253_pro_2403	PPN31114_02823	cp006900_pro_2902
OG0000078	NA	PAN31117_03408, PAN31117_05328	PAN31108_01008	cp011501_pro_2350, cp011501_pro_3236	cp013481_pro_2377, cp013481_pro_3171	cp014018_pro_2735, cp014018_pro_3563	PAP18089_04293, PAP18089_04542	rhsh01000014_pro_29, rhsh01000015_pro_27	rhsg01000010_pro_29, rhsg01000015_pro_27	rwhx01000012_pro_61, rwhx01000023_pro_26	pyya01000016_pro_61, pyya01000028_pro_26	rzmt01000001_pro_440, rzmt01000013_pro_61	rzmu01000023_pro_26, rzmu01000033_pro_14	rwhw01000038_pro_28, rwhw01000052_pro_26	nbta01000006_pro_213, nbta01000017_pro_27	rses01000017_pro_55, rses01000061_pro_26	rzmv01000004_pro_153, rzmv01000039_pro_14	rqxy01000034_pro_11, rqxy01000041_pro_14	rser01000015_pro_55, rser01000044_pro_26	rrcr01000021_pro_26, rrcr01000042_pro_14	rwhv01000021_pro_26, rwhv01000040_pro_28	cp011279_pro_1600, cp011279_pro_713	cp010518_pro_1599, cp010518_pro_713	PAQ31011_01278, PAQ31011_02900	PBR20603_00698	maos01000002_pro_59, maos01000026_pro_6	PCA20602_00010, PCA20602_01528	PCA31118_01253, PCA31118_03974	B6_01913	PCE31106_00037	PCE31107_00199	PCO31010_01666, PCO31010_02123	PCO31110_02033	PCO31111_04788	kb944426_pro_176	NA	cp011807_pro_3282, cp011807_pro_75	jtcr01000046_pro_4, jtcr01000054_pro_33	jtcs01000018_pro_130, jtcs01000042_pro_33	PFI31113_02943, PFI31113_03931	PHO31112_01694	PIN31009_01800, PIN31009_02512	PIN31115_01988, PIN31115_03788	PMO31116_01519, PMO31116_04292	cp013480_pro_2321, cp013480_pro_3420	PNO31109_01932	cp011253_pro_3545, cp011253_pro_62	PPN31114_00676, PPN31114_01693	cp006900_pro_3953, cp006900_pro_945
OG0000079	muhy01000001_pro_59	PAN31117_00896, PAN31117_02566	PAN31108_00387, PAN31108_01647	cp011501_pro_1919, cp011501_pro_552	cp013481_pro_1988, cp013481_pro_4496	cp014018_pro_2370, cp014018_pro_957	PAP18089_00575, PAP18089_01437	rhsh01000004_pro_138, rhsh01000005_pro_207	rhsg01000002_pro_249, rhsg01000007_pro_208	rwhx01000001_pro_209, rwhx01000004_pro_66	pyya01000001_pro_300, pyya01000002_pro_148	rzmt01000001_pro_59, rzmt01000003_pro_163	rzmu01000001_pro_232, rzmu01000003_pro_163	rwhw01000002_pro_64, rwhw01000003_pro_86	nbta01000008_pro_146, nbta01000022_pro_385	rses01000001_pro_148, rses01000003_pro_10	rzmv01000001_pro_147, rzmv01000002_pro_63	rqxy01000001_pro_5, rqxy01000002_pro_10	rser01000001_pro_163, rser01000004_pro_30	rrcr01000001_pro_163, rrcr01000003_pro_160	rwhv01000001_pro_74, rwhv01000002_pro_5	cp011279_pro_283, cp011279_pro_3619	cp010518_pro_283, cp010518_pro_3602	PAQ31011_00641, PAQ31011_03256	PBR20603_01802	maos01000023_pro_61, maos01000105_pro_1	PCA20602_02504	PCA31118_02851	B6_01141	PCE31106_01796	PCE31107_02352	PCO31010_00693, PCO31010_02883	PCO31110_00675, PCO31110_02494	PCO31111_01896	kb944423_pro_417, kb944454_pro_677	PEP31012_02430	cp011807_pro_1604, cp011807_pro_2442	jtcr01000012_pro_98, jtcr01000018_pro_136	jtcs01000007_pro_3, jtcs01000016_pro_136	PFI31113_01140, PFI31113_02753	PHO31112_00282, PHO31112_01021	PIN31009_00961, PIN31009_02052	PIN31115_01155, PIN31115_02243	PMO31116_02571	cp013480_pro_3224	PNO31109_01574	cp011253_pro_1711, cp011253_pro_2694	PPN31114_01482, PPN31114_02927	cp006900_pro_2545
OG0000080	muhy01000001_pro_288	PAN31117_04786	PAN31108_01697, PAN31108_04985	cp011501_pro_1725, cp011501_pro_1871	cp013481_pro_1938, cp013481_pro_3276	cp014018_pro_2162, cp014018_pro_2316	PAP18089_01228, PAP18089_05214	rhsh01000004_pro_84, rhsh01000028_pro_28	rhsg01000002_pro_195, rhsg01000002_pro_37	rwhx01000001_pro_263, rwhx01000005_pro_20	pyya01000001_pro_246, pyya01000001_pro_90	rzmt01000001_pro_5, rzmt01000020_pro_20	rzmu01000001_pro_178, rzmu01000001_pro_20	rwhw01000002_pro_10, rwhw01000005_pro_3	nbta01000015_pro_37, nbta01000022_pro_437	rses01000001_pro_94, rses01000021_pro_13	rzmv01000002_pro_10, rzmv01000022_pro_20	rqxy01000023_pro_13, rqxy01000032_pro_10	rser01000004_pro_82, rser01000026_pro_13	rrcr01000006_pro_94, rrcr01000018_pro_13	rwhv01000018_pro_68, rwhv01000029_pro_10	cp011279_pro_235, cp011279_pro_89	cp010518_pro_235, cp010518_pro_89	PAQ31011_03203	PBR20603_01567, PBR20603_01749	maos01000028_pro_49	PCA20602_02454	PCA31118_02801	B6_03397	PCE31106_01842, PCE31106_03541	PCE31107_02398	PCO31010_02830	PCO31110_02255, PCO31110_02446	PCO31111_01847, PCO31111_03924	kb944423_pro_466, kb944439_pro_96	PEP31012_02219, PEP31012_02384	cp011807_pro_1554	jtcr01000014_pro_174, jtcr01000030_pro_42	jtcs01000030_pro_12, jtcs01000031_pro_42	PFI31113_00829, PFI31113_01090	PHO31112_00971, PHO31112_04816	PIN31009_01999	PIN31115_02190	PMO31116_02353, PMO31116_02520	cp013480_pro_3276	PNO31109_01520	cp011253_pro_1660	PPN31114_01538	cp006900_pro_2591, cp006900_pro_2739
OG0000081	muhy01000001_pro_561	PAN31117_01322, PAN31117_01323	PAN31108_04030	cp011501_pro_4234, cp011501_pro_4235	cp013481_pro_758, cp013481_pro_759	cp014018_pro_4593, cp014018_pro_4594	PAP18089_03235, PAP18089_03236	rhsh01000006_pro_223, rhsh01000006_pro_224	rhsg01000004_pro_411, rhsg01000004_pro_412	rwhx01000053_pro_25, rwhx01000053_pro_26	pyya01000046_pro_8, pyya01000046_pro_9	rzmt01000045_pro_7, rzmt01000045_pro_8	rzmu01000045_pro_25, rzmu01000045_pro_26	rwhw01000058_pro_25, rwhw01000058_pro_26	nbta01000004_pro_252, nbta01000004_pro_253	rses01000053_pro_25, rses01000053_pro_26	rzmv01000025_pro_25, rzmv01000025_pro_26	rqxy01000057_pro_7, rqxy01000057_pro_8	rser01000076_pro_1, rser01000076_pro_2	rrcr01000055_pro_24, rrcr01000055_pro_25	rwhv01000058_pro_7, rwhv01000058_pro_8	cp011279_pro_2598, cp011279_pro_2599	cp010518_pro_2597, cp010518_pro_2598	PAQ31011_02374, PAQ31011_02375	PBR20603_03419, PBR20603_03420	maos01000035_pro_67	PCA20602_00537, PCA20602_00538	PCA31118_02543	B6_00129	PCE31106_02755, PCE31106_02756	PCE31107_01155	PCO31010_05364	PCO31110_03122	PCO31111_02987, PCO31111_02988	kb944457_pro_218	PEP31012_00605	cp011807_pro_3723	jtcr01000019_pro_39, jtcr01000019_pro_40	jtcs01000047_pro_22, jtcs01000047_pro_23	PFI31113_02136, PFI31113_02137	PHO31112_01885, PHO31112_01886	PIN31009_04697, PIN31009_04698	PIN31115_04871, PIN31115_04872	PMO31116_01802, PMO31116_01803	cp013480_pro_4547, cp013480_pro_4548	PNO31109_01224, PNO31109_01225	cp011253_pro_4004	PPN31114_03713, PPN31114_03714	cp006900_pro_472
OG0000082	NA	PAN31117_00424, PAN31117_00660	PAN31108_04275	cp011501_pro_834	cp013481_pro_4207	cp014018_pro_1246	PAP18089_00869	rhsh01000002_pro_254	rhsg01000003_pro_255	rwhx01000029_pro_43	pyya01000007_pro_42	rzmt01000030_pro_20	rzmu01000025_pro_21	rwhw01000021_pro_42	nbta01000008_pro_436	rses01000031_pro_42	rzmv01000031_pro_21	rqxy01000030_pro_42	rser01000047_pro_14	rrcr01000030_pro_21	rwhv01000025_pro_21	cp011279_pro_3902	cp010518_pro_3885	PAQ31011_00387, PAQ31011_01824, PAQ31011_02157	PBR20603_00207	maos01000001_pro_273, maos01000023_pro_39, maos01000039_pro_189, maos01000050_pro_160	PCA20602_01035, PCA20602_03412, PCA20602_04980	PCA31118_00533, PCA31118_00763, PCA31118_01856, PCA31118_03367	B6_00548, B6_00709	PCE31106_00586, PCE31106_03521	PCE31107_00698, PCE31107_04455	PCO31010_00397	PCO31110_00344, PCO31110_00386	PCO31111_00179, PCO31111_00210, PCO31111_00999	kb944454_pro_346, kb944454_pro_388	PEP31012_01125	cp011807_pro_593	jtcr01000011_pro_2, jtcr01000011_pro_43	jtcs01000008_pro_2, jtcs01000008_pro_43	PFI31113_01506, PFI31113_01549	PHO31112_02237, PHO31112_02291, PHO31112_04655	PIN31009_00753, PIN31009_00787	PIN31115_00929, PIN31115_00962	PMO31116_00628	cp013480_pro_652, cp013480_pro_686	PNO31109_00206, PNO31109_03917	cp011253_pro_2453, cp011253_pro_3068, cp011253_pro_626	PPN31114_02778	cp006900_pro_1604
OG0000083	NA	PAN31117_02239	PAN31108_04410, PAN31108_04978	cp011501_pro_1732, cp011501_pro_210	cp013481_pro_3269, cp013481_pro_48	cp014018_pro_2169, cp014018_pro_622	PAP18089_00223, PAP18089_05207	rhsh01000011_pro_108, rhsh01000028_pro_21	rhsg01000002_pro_44, rhsg01000005_pro_217	rwhx01000005_pro_27, rwhx01000008_pro_10	pyya01000001_pro_97, pyya01000003_pro_73	rzmt01000002_pro_72, rzmt01000020_pro_27	rzmu01000001_pro_27, rzmu01000004_pro_101	rwhw01000005_pro_10, rwhw01000080_pro_5	nbta01000009_pro_400, nbta01000015_pro_44	rses01000005_pro_37, rses01000021_pro_20	rzmv01000010_pro_101, rzmv01000022_pro_27	rqxy01000004_pro_10, rqxy01000023_pro_20	rser01000022_pro_15, rser01000026_pro_20	rrcr01000009_pro_10, rrcr01000018_pro_20	rwhv01000007_pro_10, rwhv01000018_pro_61	cp011279_pro_3228, cp011279_pro_96	cp010518_pro_3230, cp010518_pro_96	PAQ31011_01142	PBR20603_00800, PBR20603_00857, PBR20603_01574	maos01000022_pro_73	PCA20602_01395	PCA31118_01095	B6_02071	PCE31106_03285, PCE31106_03548	PCE31107_00032	PCO31010_01523	PCO31110_01045, PCO31110_02262	PCO31111_01375, PCO31111_03931	kb944439_pro_103, kb944459_pro_11	PEP31012_00099, PEP31012_02226, PEP31012_04619	cp011807_pro_4391	jtcr01000005_pro_13	jtcs01000019_pro_13	PFI31113_00836, PFI31113_03318	PHO31112_02561, PHO31112_04809	PIN31009_00037	PIN31115_00223	PMO31116_01636, PMO31116_02360	cp013480_pro_5189	PNO31109_02039	cp011253_pro_4671	PPN31114_02067	cp006900_pro_4059
OG0000084	NA	PAN31117_01900	PAN31108_01367, PAN31108_02680	cp011501_pro_2483, cp011501_pro_3398	cp013481_pro_1595, cp013481_pro_2468	cp014018_pro_2874, cp014018_pro_3825	PAP18089_02992, PAP18089_04060	rhsh01000001_pro_334, rhsh01000003_pro_73	rhsg01000001_pro_374, rhsg01000006_pro_72	rwhx01000026_pro_18, rwhx01000047_pro_31	pyya01000015_pro_37, pyya01000019_pro_46	rzmt01000017_pro_43, rzmt01000026_pro_31	rzmu01000028_pro_43, rzmu01000035_pro_29	rwhw01000023_pro_12, rwhw01000041_pro_7	nbta01000006_pro_73, nbta01000013_pro_217	rses01000040_pro_7	rzmv01000016_pro_43, rzmv01000026_pro_29	rqxy01000033_pro_43, rqxy01000053_pro_3	rser01000019_pro_39	rrcr01000022_pro_31, rrcr01000032_pro_43	rwhv01000005_pro_7	cp011279_pro_1762, cp011279_pro_847	cp010518_pro_1761, cp010518_pro_847	PAQ31011_00122	PBR20603_00979, PBR20603_04184	NA	NA	PCA31118_00963, PCA31118_04653	B6_02582, B6_02747, B6_02748	PCE31106_01435, PCE31106_03113	PCE31107_02171, PCE31107_03408	PCO31010_00120	PCO31110_03892, PCO31110_04477	PCO31111_02172, PCO31111_03843	kb944424_pro_120, kb944444_pro_60	PEP31012_03786, PEP31012_04160	cp011807_pro_2092, cp011807_pro_3003	NA	NA	NA	PHO31112_03789, PHO31112_04102	PIN31009_02285, PIN31009_03189	PIN31115_03180, PIN31115_03999	PMO31116_00112, PMO31116_02058	cp013480_pro_1385, cp013480_pro_2542	PNO31109_00916, PNO31109_01741	NA	PPN31114_00938	cp006900_pro_2049
OG0000085	NA	PAN31117_02148	PAN31108_00174, PAN31108_02248	cp011501_pro_125, cp011501_pro_3137	cp013481_pro_136, cp013481_pro_3071	cp014018_pro_3463, cp014018_pro_533	PAP18089_00135, PAP18089_04188	rhsh01000007_pro_129, rhsh01000017_pro_16	rhsg01000005_pro_129, rhsg01000016_pro_15	rwhx01000013_pro_15, rwhx01000022_pro_17	pyya01000009_pro_48, pyya01000025_pro_61	rzmt01000015_pro_16, rzmt01000022_pro_17	rzmu01000006_pro_128, rzmu01000015_pro_16	rwhw01000006_pro_15, rwhw01000016_pro_14	nbta01000009_pro_311, nbta01000012_pro_73	rses01000007_pro_34, rses01000022_pro_17	rzmv01000006_pro_129, rzmv01000008_pro_49	rqxy01000006_pro_34, rqxy01000024_pro_54	rser01000013_pro_74, rser01000027_pro_60	rrcr01000004_pro_74, rrcr01000005_pro_128	rwhv01000003_pro_67, rwhv01000037_pro_26	cp011279_pro_1501, cp011279_pro_3143	cp010518_pro_1500, cp010518_pro_3145	PAQ31011_00218, PAQ31011_00681, PAQ31011_04692	PBR20603_02931	maos01000072_pro_53	PCA20602_04161	PCA31118_03607	B6_02320	PCE31106_03886	PCE31107_03929	PCO31010_01428	PCO31110_01134, PCO31110_01884	PCO31111_01064, PCO31111_01287	kb944426_pro_84, kb944456_pro_79	PEP31012_03036	cp011807_pro_4300	jtcr01000005_pro_97, jtcr01000020_pro_123	jtcs01000014_pro_123, jtcs01000019_pro_97	PFI31113_00014, PFI31113_03228	PHO31112_02470, PHO31112_04022	PIN31009_00858, PIN31009_04828	PIN31115_00130, PIN31115_01030	PMO31116_03584	cp013480_pro_5095, cp013480_pro_750	PNO31109_04175	cp011253_pro_4575	PPN31114_00825, PPN31114_01977	cp006900_pro_4140
OG0000086	NA	PAN31117_01702	PAN31108_00102	cp011501_pro_2587, cp011501_pro_3800	cp013481_pro_1204, cp013481_pro_2581	cp014018_pro_2988, cp014018_pro_4218	PAP18089_02117, PAP18089_04667	rhsh01000001_pro_219, rhsh01000016_pro_58	rhsg01000001_pro_259, rhsg01000004_pro_48	rwhx01000002_pro_64, rwhx01000010_pro_24	pyya01000004_pro_66, pyya01000005_pro_65	rzmt01000008_pro_64, rzmt01000025_pro_3	rzmu01000002_pro_98, rzmu01000011_pro_16	rwhw01000001_pro_164, rwhw01000031_pro_23	nbta01000023_pro_133, nbta01000023_pro_550	rses01000009_pro_80, rses01000023_pro_6	rzmv01000003_pro_162, rzmv01000011_pro_16	rqxy01000008_pro_23, rqxy01000013_pro_98	rser01000002_pro_162, rser01000008_pro_64	rrcr01000002_pro_98, rrcr01000012_pro_22	rwhv01000004_pro_62, rwhv01000009_pro_77	cp011279_pro_2164, cp011279_pro_951	cp010518_pro_2163, cp010518_pro_951	PAQ31011_00261, PAQ31011_00329	PBR20603_02388	maos01000039_pro_138	PCA20602_00984, PCA20602_04660	PCA31118_00806	B6_02723	PCE31106_03089	PCE31107_00100, PCE31107_02195	PCO31010_00341	PCO31110_03490	PCO31111_01548	kb944452_pro_120	PEP31012_00235, PEP31012_04139	cp011807_pro_2208	jtcr01000004_pro_95, jtcr01000009_pro_223	jtcs01000003_pro_1, jtcs01000022_pro_66	PFI31113_00508, PFI31113_04037	PHO31112_01564, PHO31112_04652	PIN31009_02713, PIN31009_04135	PIN31115_03581, PIN31115_04583	PMO31116_03258, PMO31116_04324	cp013480_pro_2117, cp013480_pro_4153	PNO31109_00852, PNO31109_03110	cp011253_pro_2401	PPN31114_00504, PPN31114_03247	cp006900_pro_914
OG0000087	NA	PAN31117_03358, PAN31117_03360	PAN31108_01049, PAN31108_01050, PAN31108_01051	NA	cp013481_pro_3061	cp014018_pro_1785, cp014018_pro_3452	NA	rhsh01000017_pro_6	rhsg01000016_pro_5	rwhx01000013_pro_2	pyya01000009_pro_35	rzmt01000015_pro_3	rzmu01000015_pro_3	rwhw01000006_pro_2	NA	rses01000007_pro_21	rzmv01000008_pro_35, rzmv01000008_pro_36	rqxy01000006_pro_21	rser01000013_pro_87, rser01000013_pro_88	rrcr01000004_pro_87	rwhv01000003_pro_53, rwhv01000003_pro_54	NA	NA	PAQ31011_01226, PAQ31011_01227	NA	NA	PCA20602_01477, PCA20602_01479, PCA20602_03644	PCA31118_01205, PCA31118_01888	B6_00506, B6_04610	PCE31106_03162, PCE31106_03165	NA	PCO31010_03616	PCO31110_00982, PCO31110_00983	PCO31111_00784, PCO31111_00788, PCO31111_04595, PCO31111_05114, PCO31111_05116	kb944434_pro_126, kb944434_pro_127, kb944442_pro_9, kb944454_pro_1007, kb944454_pro_993, kb944454_pro_996	PEP31012_04381, PEP31012_04668, PEP31012_04669	NA	jtcr01000048_pro_59	jtcs01000001_pro_82	NA	PHO31112_00534, PHO31112_02256, PHO31112_02258, PHO31112_04045, PHO31112_04046, PHO31112_05359, PHO31112_05361, PHO31112_05420, PHO31112_05422	NA	NA	PMO31116_02869, PMO31116_04740	NA	NA	cp011253_pro_4304	NA	cp006900_pro_1293, cp006900_pro_1295, cp006900_pro_1296
OG0000088	NA	PAN31117_00689, PAN31117_04152	PAN31108_04121	cp011501_pro_2650, cp011501_pro_306	cp013481_pro_2646, cp013481_pro_4748	cp014018_pro_3053, cp014018_pro_702	PAP18089_00317, PAP18089_04733	rhsh01000001_pro_154, rhsh01000011_pro_29	rhsg01000001_pro_194, rhsg01000005_pro_296	rwhx01000002_pro_129, rwhx01000008_pro_87	pyya01000003_pro_205, pyya01000004_pro_131	rzmt01000002_pro_168, rzmt01000006_pro_64	rzmu01000002_pro_163, rzmu01000004_pro_25	rwhw01000001_pro_99, rwhw01000004_pro_65	nbta01000009_pro_494, nbta01000023_pro_199	rses01000004_pro_59, rses01000005_pro_114	rzmv01000003_pro_97, rzmv01000010_pro_25	rqxy01000004_pro_87	rser01000021_pro_25	rrcr01000009_pro_87	rwhv01000004_pro_127, rwhv01000007_pro_86	cp011279_pro_1014, cp011279_pro_3372	cp010518_pro_1014, cp010518_pro_3355	PAQ31011_00418, PAQ31011_02158	PBR20603_00762	maos01000034_pro_71, maos01000050_pro_180	PCA20602_01064, PCA20602_03445	PCA31118_00732, PCA31118_04914	B6_00181	NA	PCE31107_02023	PCO31010_00428, PCO31010_05172	PCO31110_00938	PCO31111_00738	kb944454_pro_949	PEP31012_03865	cp011807_pro_2262	jtcr01000004_pro_150, jtcr01000027_pro_73	jtcs01000003_pro_56, jtcs01000018_pro_73	PFI31113_00447, PFI31113_03005	PHO31112_04982	PIN31009_01488, PIN31009_02683	PIN31115_01670, PIN31115_03611	PMO31116_00321, PMO31116_00732	cp013480_pro_2149, cp013480_pro_3742	PNO31109_00816, PNO31109_03845	cp011253_pro_2483	PPN31114_00536, PPN31114_04866	cp006900_pro_1874
OG0000089	NA	PAN31117_03569	PAN31108_01258, PAN31108_02967, PAN31108_04729	cp011501_pro_3506	cp013481_pro_1484	cp014018_pro_3936	PAP18089_02827	rhsh01000003_pro_184	rhsg01000006_pro_183	rwhx01000044_pro_16	pyya01000018_pro_79	rzmt01000007_pro_100	rzmu01000016_pro_78	rwhw01000048_pro_16	nbta01000013_pro_101	rses01000048_pro_16	rzmv01000007_pro_68	rqxy01000015_pro_78	rser01000024_pro_50	rrcr01000047_pro_16	rwhv01000012_pro_77	cp011279_pro_1870	cp010518_pro_1869	PAQ31011_03067, PAQ31011_03673	PBR20603_02783	maos01000026_pro_50, maos01000038_pro_22, maos01000058_pro_2	PCA20602_00051, PCA20602_00075, PCA20602_02212	PCA31118_00274, PCA31118_03748, PCA31118_04379	B6_04045	NA	NA	PCO31010_02698, PCO31010_04323	PCO31110_03767	PCO31111_03329	kb944431_pro_157	NA	cp011807_pro_3110	jtcr01000001_pro_63, jtcr01000013_pro_38	jtcs01000025_pro_235, jtcs01000025_pro_7	PFI31113_03547, PFI31113_04599	PHO31112_03295, PHO31112_04521	PIN31009_00440, PIN31009_03107, PIN31009_03310, PIN31009_04322	PIN31115_00617, PIN31115_02689, PIN31115_03059, PIN31115_03294	PMO31116_00225, PMO31116_02162	cp013480_pro_1276, cp013480_pro_1814, cp013480_pro_326	PNO31109_01146, PNO31109_01852, PNO31109_03175	cp011253_pro_3368	PPN31114_00794, PPN31114_02445, PPN31114_04379	cp006900_pro_1101, cp006900_pro_1960
OG0000090	NA	PAN31117_00673, PAN31117_05184	NA	cp011501_pro_2565, cp011501_pro_2634	cp013481_pro_2552, cp013481_pro_2630	cp014018_pro_2959, cp014018_pro_3037	PAP18089_04638, PAP18089_04717	rhsh01000001_pro_170, rhsh01000001_pro_248	rhsg01000001_pro_210, rhsg01000001_pro_288	rwhx01000002_pro_113, rwhx01000002_pro_39	pyya01000004_pro_115, pyya01000004_pro_41	rzmt01000006_pro_48, rzmt01000025_pro_28	rzmu01000002_pro_147, rzmu01000002_pro_73	rwhw01000001_pro_115, rwhw01000001_pro_189	nbta01000023_pro_105, nbta01000023_pro_183	rses01000004_pro_43, rses01000023_pro_31	rzmv01000003_pro_113, rzmv01000003_pro_187	rqxy01000013_pro_73, rqxy01000016_pro_41	rser01000002_pro_113, rser01000002_pro_184	rrcr01000002_pro_147, rrcr01000002_pro_73	rwhv01000004_pro_111, rwhv01000004_pro_37	cp011279_pro_929, cp011279_pro_998	cp010518_pro_929, cp010518_pro_998	PAQ31011_00402	NA	maos01000034_pro_87	PCA20602_01048	PCA31118_00748	B6_00165	PCE31106_03905	PCE31107_02038	PCO31010_00412, PCO31010_01243	PCO31110_01853	PCO31111_01033	kb944426_pro_52	PEP31012_03051, PEP31012_03880	cp011807_pro_2245	jtcr01000004_pro_135	jtcs01000003_pro_41	PFI31113_00463	PHO31112_03991	PIN31009_02502, PIN31009_02667	PIN31115_03627, PIN31115_03798	PMO31116_00252, PMO31116_00305, PMO31116_04007	cp013480_pro_2165, cp013480_pro_2331	NA	cp011253_pro_2467	PPN31114_00552, PPN31114_00688	cp006900_pro_1889, cp006900_pro_1939
OG0000091	NA	PAN31117_00455, PAN31117_02382, PAN31117_05365, PAN31117_05368	PAN31108_04253, PAN31108_05145, PAN31108_05148	cp011501_pro_2296	cp013481_pro_2321	cp014018_pro_2678	PAP18089_04485	rhsh01000014_pro_87	rhsg01000010_pro_86	rwhx01000011_pro_25	pyya01000006_pro_25	rzmt01000001_pro_367	rzmu01000012_pro_25	rwhw01000010_pro_52	nbta01000006_pro_270	rses01000011_pro_25	rzmv01000004_pro_81	rqxy01000055_pro_25	rser01000006_pro_132	rrcr01000024_pro_38	rwhv01000024_pro_25	cp011279_pro_659	cp010518_pro_659	PAQ31011_01859	PBR20603_03544	maos01000001_pro_242, maos01000061_pro_57, maos01000079_pro_3, maos01000088_pro_1	PCA20602_04636, PCA20602_04959	PCA31118_01885, PCA31118_05373, PCA31118_05376	B6_00290	PCE31106_02605, PCE31106_02998	PCE31107_02663, PCE31107_02733, PCE31107_03764	PCO31010_03610	PCO31110_00274	PCO31111_00118	kb944454_pro_274	PEP31012_00561, PEP31012_00575, PEP31012_03443	NA	jtcr01000037_pro_3	jtcs01000026_pro_3	PFI31113_03718	PHO31112_02165	PIN31009_00833, PIN31009_03685	PIN31115_01003, PIN31115_02858, PIN31115_02861, PIN31115_05175	PMO31116_03430	cp013480_pro_2806, cp013480_pro_725	PNO31109_02573	NA	PPN31114_01138	cp006900_pro_2215, cp006900_pro_2914
OG0000092	NA	PAN31117_02854, PAN31117_02858, PAN31117_04820	PAN31108_02391	cp011501_pro_4523	cp013481_pro_466	cp014018_pro_270	PAP18089_03826	rhsh01000009_pro_120	rhsg01000012_pro_120	rwhx01000003_pro_102	pyya01000014_pro_101	rzmt01000012_pro_102	rzmu01000014_pro_102	rwhw01000110_pro_1	nbta01000009_pro_46	rses01000012_pro_102	rzmv01000013_pro_102	rqxy01000011_pro_101	rser01000095_pro_1	rrcr01000013_pro_101	rwhv01000010_pro_102	cp011279_pro_2886	cp010518_pro_2888	PAQ31011_04286	PBR20603_01655, PBR20603_01987, PBR20603_02103, PBR20603_02104	maos01000013_pro_74, maos01000086_pro_1	PCA20602_02679, PCA20602_03857	PCA31118_03232	B6_03026, B6_03834, B6_03842	PCE31106_01996, PCE31106_02004, PCE31106_02290	PCE31107_02718, PCE31107_03131, PCE31107_03604	PCO31010_03290, PCO31010_03294, PCO31010_04847	PCO31110_01479, PCO31110_02675, PCO31110_04135	PCO31111_02952, PCO31111_04933	kb944423_pro_227, kb944425_pro_60, kb944435_pro_209	PEP31012_02698, PEP31012_02708, PEP31012_03276, PEP31012_03277	cp011807_pro_1090, cp011807_pro_1091, cp011807_pro_2856, cp011807_pro_4022	jtcr01000017_pro_10, jtcr01000019_pro_60	jtcs01000021_pro_10, jtcs01000047_pro_43	PFI31113_02159, PFI31113_02462	PHO31112_00738, PHO31112_04216, PHO31112_05010	PIN31009_01336	PIN31115_01522	PMO31116_02933	cp013480_pro_3889	PNO31109_02821, PNO31109_02822	cp011253_pro_1136	PPN31114_04723	cp006900_pro_3029
OG0000093	NA	PAN31117_02886	PAN31108_02419	cp011501_pro_1349, cp011501_pro_1548	cp013481_pro_3463, cp013481_pro_3702	cp014018_pro_1755, cp014018_pro_1976	PAP18089_03505, PAP18089_04793	rhsh01000012_pro_33, rhsh01000013_pro_28	rhsg01000008_pro_169, rhsg01000014_pro_33	rwhx01000040_pro_23, rwhx01000087_pro_5	pyya01000011_pro_33, pyya01000013_pro_84	rzmt01000011_pro_28, rzmt01000040_pro_32	rzmu01000010_pro_33, rzmu01000013_pro_84	rwhw01000039_pro_23, rwhw01000060_pro_5	nbta01000014_pro_191, nbta01000014_pro_7	rses01000032_pro_32, rses01000034_pro_28	rzmv01000012_pro_84, rzmv01000030_pro_32	rqxy01000007_pro_33, rqxy01000014_pro_78	rser01000031_pro_31	rrcr01000011_pro_33, rrcr01000051_pro_17	rwhv01000034_pro_33, rwhv01000042_pro_28	cp011279_pro_4404, cp011279_pro_4603	cp010518_pro_4389, cp010518_pro_4588	PAQ31011_04259	PBR20603_02130, PBR20603_03148	maos01000013_pro_44	PCA20602_03887	PCA31118_03202	B6_00936, B6_03810	PCE31106_02028, PCE31106_03207	PCE31107_00113, PCE31107_03154	PCO31010_03321	NA	PCO31111_02723	NA	PEP31012_00264, PEP31012_02675	cp011807_pro_1061	jtcr01000002_pro_74, jtcr01000017_pro_35	jtcs01000013_pro_74, jtcs01000021_pro_35	PFI31113_01470, PFI31113_02433, PFI31113_02649	NA	PIN31009_01309, PIN31009_01743	PIN31115_01495, PIN31115_01931	PMO31116_02959, PMO31116_04008	cp013480_pro_3475, cp013480_pro_3915	NA	cp011253_pro_1108	PPN31114_01756, PPN31114_04696	cp006900_pro_3055
OG0000094	NA	PAN31117_03330, PAN31117_05211	PAN31108_01075	cp011501_pro_298, cp011501_pro_3271	cp013481_pro_3205, cp013481_pro_4756	cp014018_pro_3596, cp014018_pro_693	PAP18089_00309, PAP18089_04328	rhsh01000011_pro_37, rhsh01000015_pro_60	rhsg01000005_pro_288, rhsg01000015_pro_60	rwhx01000008_pro_79, rwhx01000012_pro_26	pyya01000003_pro_197, pyya01000016_pro_27	rzmt01000002_pro_160, rzmt01000013_pro_26	rzmu01000004_pro_33, rzmu01000038_pro_20	rwhw01000004_pro_57, rwhw01000045_pro_20	nbta01000009_pro_485, nbta01000017_pro_61	rses01000005_pro_106, rses01000017_pro_20	rzmv01000010_pro_33, rzmv01000043_pro_20	rqxy01000004_pro_79, rqxy01000045_pro_20	rser01000015_pro_23, rser01000021_pro_33	rrcr01000009_pro_79, rrcr01000033_pro_26	rwhv01000007_pro_78, rwhv01000046_pro_19	cp011279_pro_1635, cp011279_pro_3364	cp010518_pro_1634, cp010518_pro_3347	PAQ31011_01198, PAQ31011_04866	PBR20603_00771, PBR20603_04324	maos01000022_pro_3, maos01000061_pro_89	PCA20602_01454	PCA31118_01179	B6_00516	PCE31106_03557	PCE31107_04429	PCO31010_01190, PCO31010_01586	PCO31110_00947, PCO31110_02070	PCO31111_00747, PCO31111_04566	kb944426_pro_214, kb944454_pro_958	PEP31012_02236	cp011807_pro_7	jtcr01000013_pro_20, jtcr01000027_pro_66	jtcs01000018_pro_66, jtcs01000025_pro_253	PFI31113_03016	PHO31112_04257, PHO31112_04973	PIN31009_00116	PIN31115_00323	PMO31116_02693	cp013480_pro_1524, cp013480_pro_29	PNO31109_03575	cp011253_pro_10	PPN31114_02137, PPN31114_04128	cp006900_pro_1337
OG0000095	NA	PAN31117_03484, PAN31117_04036	PAN31108_00367, PAN31108_00928, PAN31108_04560	cp011501_pro_1087	cp013481_pro_3968	cp014018_pro_1482	PAP18089_05001	rhsh01000020_pro_84	rhsg01000018_pro_84	rwhx01000045_pro_20	pyya01000031_pro_50	rzmt01000032_pro_20	rzmu01000041_pro_20	rwhw01000050_pro_20	nbta01000005_pro_22	rses01000049_pro_20	rzmv01000050_pro_17	rqxy01000037_pro_42	NA	rrcr01000037_pro_42	rwhv01000060_pro_20	cp011279_pro_4155	cp010518_pro_4140	NA	PBR20603_04645, PBR20603_04671	maos01000023_pro_80	PCA20602_01606, PCA20602_03235	PCA31118_01331, PCA31118_04866	B6_02216	PCE31106_00834	PCE31107_00928	PCO31010_01745, PCO31010_03134, PCO31010_05226	PCO31110_00131, PCO31110_04707	PCO31111_04282	kb944454_pro_125	PEP31012_00924	cp011807_pro_148, cp011807_pro_826, cp011808_pro_111	jtcr01000014_pro_125, jtcr01000038_pro_56	jtcs01000030_pro_61, jtcs01000032_pro_16	PFI31113_00889, PFI31113_03402	PHO31112_03939, PHO31112_04575	PIN31009_00270, PIN31009_01084	PIN31115_01277, PIN31115_04493	PMO31116_00798, PMO31116_01447	cp013480_pro_970	PNO31109_03866	cp011253_pro_136, cp011253_pro_878, cp011518_pro_145	PPN31114_02286, PPN31114_03060	cp006900_pro_3221, cp006900_pro_3275, cp006900_pro_3895
OG0000096	NA	PAN31117_00670, PAN31117_03621	PAN31108_01206	cp011501_pro_2632, cp011501_pro_3544	cp013481_pro_1445, cp013481_pro_2627	cp014018_pro_3034, cp014018_pro_3976	PAP18089_02786, PAP18089_04714	rhsh01000001_pro_173, rhsh01000003_pro_223	rhsg01000001_pro_213, rhsg01000006_pro_222	rwhx01000002_pro_110, rwhx01000031_pro_39	pyya01000004_pro_112, pyya01000018_pro_40	rzmt01000006_pro_45, rzmt01000007_pro_61	rzmu01000002_pro_144, rzmu01000016_pro_39	rwhw01000001_pro_118, rwhw01000020_pro_39	nbta01000013_pro_62, nbta01000023_pro_180	rses01000004_pro_40, rses01000029_pro_39	rzmv01000003_pro_116, rzmv01000007_pro_107	rqxy01000015_pro_39, rqxy01000016_pro_44	rser01000002_pro_116, rser01000024_pro_13	rrcr01000002_pro_144, rrcr01000031_pro_39	rwhv01000004_pro_108, rwhv01000012_pro_38	cp011279_pro_1908, cp011279_pro_996	cp010518_pro_1907, cp010518_pro_996	PAQ31011_00399, PAQ31011_03717	PBR20603_02745	maos01000039_pro_201, maos01000045_pro_5	PCA20602_01045, PCA20602_02263	PCA31118_00751, PCA31118_04430	B6_00162	PCE31106_04489	PCE31107_02042	PCO31010_00409, PCO31010_04266	NA	NA	NA	PEP31012_03883	cp011807_pro_2242, cp011807_pro_3159	jtcr01000024_pro_28	jtcs01000037_pro_22	PFI31113_00466, PFI31113_04326	NA	PIN31009_02664, PIN31009_04379	PIN31115_03345, PIN31115_03630	PMO31116_00302	cp013480_pro_1226, cp013480_pro_2168	PNO31109_03753	cp011253_pro_2464, cp011253_pro_3417	PPN31114_00556, PPN31114_04431	cp006900_pro_1891
OG0000097	NA	PAN31117_03424	PAN31108_00992	cp011501_pro_2547, cp011501_pro_382	cp013481_pro_2532, cp013481_pro_4669	cp014018_pro_2939, cp014018_pro_781	PAP18089_00399, PAP18089_04617	rhsh01000001_pro_268, rhsh01000005_pro_32	rhsg01000001_pro_308, rhsg01000007_pro_32	rwhx01000002_pro_19, rwhx01000046_pro_8	pyya01000004_pro_21, pyya01000020_pro_28	rzmt01000002_pro_247, rzmt01000025_pro_48	rzmu01000002_pro_53, rzmu01000042_pro_27	rwhw01000001_pro_209, rwhw01000051_pro_9	nbta01000001_pro_56, nbta01000023_pro_85	rses01000023_pro_51, rses01000055_pro_9	rzmv01000003_pro_207, rzmv01000019_pro_27	rqxy01000013_pro_53	rser01000002_pro_204, rser01000018_pro_27	rrcr01000002_pro_53	rwhv01000004_pro_17, rwhv01000051_pro_27	cp011279_pro_3448, cp011279_pro_911	cp010518_pro_3431, cp010518_pro_911	PAQ31011_01294	PBR20603_00682	maos01000002_pro_74	PCA20602_01544	PCA31118_00901, PCA31118_01269	B6_03928, B6_04278	PCE31106_00053	PCE31107_00217	PCO31010_01682	PCO31110_00863, PCO31110_04541	PCO31111_00669, PCO31111_02249	kb944443_pro_67, kb944454_pro_876	PEP31012_01562, PEP31012_02877	cp011807_pro_92	jtcr01000046_pro_19	jtcs01000018_pro_145	PFI31113_02926	PHO31112_00483, PHO31112_02785, PHO31112_03218	PIN31009_00212	PIN31115_00419	PMO31116_01503	cp013480_pro_124	NA	cp011253_pro_79	PPN31114_02229	cp006900_pro_3941
OG0000098	NA	PAN31117_04343, PAN31117_05327	PAN31108_05213	cp011501_pro_3706	cp013481_pro_1301, cp013481_pro_2190	cp014018_pro_2545, cp014018_pro_4123	PAP18089_01694, PAP18089_02217	rhsh01000004_pro_314, rhsh01000029_pro_34	rhsg01000002_pro_425, rhsg01000023_pro_34	rwhx01000001_pro_34, rwhx01000061_pro_13	pyya01000001_pro_476, pyya01000048_pro_13	rzmt01000001_pro_234, rzmt01000050_pro_13	rzmu01000001_pro_407, rzmu01000051_pro_13	rwhw01000040_pro_53, rwhw01000062_pro_13	nbta01000003_pro_16, nbta01000022_pro_139	rses01000030_pro_16, rses01000059_pro_16	rzmv01000002_pro_237, rzmv01000051_pro_16	rqxy01000001_pro_180, rqxy01000061_pro_16	rser01000003_pro_143, rser01000055_pro_11	rrcr01000053_pro_16, rrcr01000058_pro_13	rwhv01000035_pro_34, rwhv01000062_pro_16	cp011279_pro_2070	cp010518_pro_2069	PAQ31011_02901	PBR20603_04420	maos01000026_pro_4	PCA20602_00008	PCA31118_00047, PCA31118_03973	B6_02149	PCE31106_01257	PCE31107_01628	PCO31010_02122	PCO31110_02687, PCO31110_03600	PCO31111_01450, PCO31111_04944	kb944423_pro_215, kb944452_pro_7	PEP31012_00004	cp011807_pro_3281	jtcr01000054_pro_34	jtcs01000042_pro_34	PFI31113_03905, PFI31113_03930	PHO31112_01210, PHO31112_01695	PIN31009_00759, PIN31009_00763	PIN31115_00934, PIN31115_00938	PMO31116_04291	cp013480_pro_658, cp013480_pro_662	PNO31109_03653	cp011253_pro_2912, cp011253_pro_3544	PPN31114_02750, PPN31114_02754	cp006900_pro_946
OG0000099	NA	PAN31117_00467, PAN31117_00486	PAN31108_03407, PAN31108_03484, PAN31108_04229	NA	NA	NA	PAP18089_00918	NA	NA	NA	NA	NA	NA	NA	NA	NA	NA	NA	NA	NA	NA	NA	NA	PAQ31011_01872, PAQ31011_01882, PAQ31011_03967	PBR20603_00162, PBR20603_00182	maos01000001_pro_209, maos01000050_pro_141	PCA20602_03022, PCA20602_03395, PCA20602_04947	PCA31118_00531, PCA31118_01817, PCA31118_01936	B6_00682	PCE31106_00619	PCE31107_00726	PCO31010_03629, PCO31010_03639	PCO31110_00327, PCO31110_00331, PCO31110_01488, PCO31110_02119, PCO31110_02916	PCO31111_00163, PCO31111_02240, PCO31111_03419, PCO31111_04607	kb944423_pro_25, kb944426_pro_241, kb944435_pro_216, kb944443_pro_73, kb944454_pro_328	PEP31012_01098	cp011807_pro_627, cp011807_pro_644	NA	NA	PFI31113_01500	PHO31112_01660, PHO31112_02216, PHO31112_04228, PHO31112_05019	PIN31009_00873, PIN31009_02531, PIN31009_02963, PIN31009_04002	PIN31115_01066, PIN31115_02560, PIN31115_03769, PIN31115_04304	PMO31116_00979, PMO31116_04581	cp013480_pro_1928, cp013480_pro_2302, cp013480_pro_4279, cp013480_pro_768	PNO31109_00170	cp011253_pro_1324, cp011253_pro_691	PPN31114_00288, PPN31114_00663, PPN31114_02848	cp006900_pro_3448
OG0000100	NA	PAN31117_04470, PAN31117_04471	PAN31108_01352, PAN31108_01354	cp011501_pro_3409	cp013481_pro_1584	cp014018_pro_3834	PAP18089_02980	rhsh01000003_pro_84	rhsg01000006_pro_83	rwhx01000026_pro_29	pyya01000019_pro_57	rzmt01000017_pro_32	rzmu01000028_pro_32	rwhw01000023_pro_23	nbta01000013_pro_206	rses01000025_pro_32	rzmv01000016_pro_32	rqxy01000033_pro_32	rser01000037_pro_32	rrcr01000032_pro_32	rwhv01000030_pro_32	cp011279_pro_1773	cp010518_pro_1772	PAQ31011_03573, PAQ31011_03574	PBR20603_04173, PBR20603_04174	maos01000083_pro_63, maos01000083_pro_64	PCA20602_02112, PCA20602_02113	PCA31118_05238, PCA31118_05239	B6_02593, B6_02594	PCE31106_01446, PCE31106_01447	PCE31107_03397, PCE31107_03398	PCO31010_04423, PCO31010_04424	PCO31110_03867, PCO31110_03868	PCO31111_03856, PCO31111_03857	kb944444_pro_36, kb944444_pro_37	PEP31012_03776, PEP31012_03777	cp011807_pro_3011, cp011807_pro_3012, cp011807_pro_3015	jtcr01000010_pro_70, jtcr01000010_pro_71	jtcs01000025_pro_93, jtcs01000025_pro_94	PFI31113_04530, PFI31113_04531	PHO31112_04088, PHO31112_04089	PIN31009_04219	PIN31115_03190	PMO31116_02068, PMO31116_02069	cp013480_pro_1376	PNO31109_01753	cp011253_pro_3271, cp011253_pro_3272	PPN31114_04272	cp006900_pro_1183, cp006900_pro_1184
OG0000101	NA	PAN31117_00252, PAN31117_02982	PAN31108_00644	cp011501_pro_1240, cp011501_pro_689	cp013481_pro_3817, cp013481_pro_4354	cp014018_pro_1100, cp014018_pro_1640	PAP18089_00720, PAP18089_03631	rhsh01000002_pro_107, rhsh01000010_pro_53	rhsg01000003_pro_107, rhsg01000008_pro_53	rwhx01000006_pro_52, rwhx01000016_pro_75	pyya01000002_pro_289, pyya01000010_pro_53	rzmt01000003_pro_23, rzmt01000009_pro_52	rzmu01000003_pro_23, rzmu01000024_pro_52	rwhw01000007_pro_51, rwhw01000015_pro_23	nbta01000010_pro_53	rses01000003_pro_151, rses01000008_pro_71	rzmv01000001_pro_287, rzmv01000027_pro_52	rqxy01000002_pro_150, rqxy01000009_pro_52	rser01000001_pro_23, rser01000007_pro_50	rrcr01000001_pro_23, rrcr01000007_pro_52	rwhv01000006_pro_52, rwhv01000041_pro_28	cp011279_pro_3757, cp011279_pro_4296	cp010518_pro_3740, cp010518_pro_4281	PAQ31011_01644, PAQ31011_04160	PBR20603_00361, PBR20603_02245	maos01000001_pro_460	PCA20602_01909	PCA31118_01632, PCA31118_03110	B6_04158	PCE31106_00436	PCE31107_00550, PCE31107_03251	PCO31010_02050, PCO31010_03422	PCO31110_00538	PCO31111_00360	kb944454_pro_538	PEP31012_01267, PEP31012_02572	cp011807_pro_434	jtcr01000003_pro_42	jtcs01000004_pro_59	PFI31113_01709, PFI31113_04667	PHO31112_00143	PIN31009_00596, PIN31009_01225	PIN31115_00774, PIN31115_01413	PMO31116_01152	cp013480_pro_480	PNO31109_00367	cp011253_pro_453	PPN31114_02599, PPN31114_04609	cp006900_pro_3632
OG0000102	NA	PAN31117_03482, PAN31117_04032	PAN31108_00380, PAN31108_00930, PAN31108_04555, PAN31108_04556	cp011501_pro_1083	cp013481_pro_3972	cp014018_pro_1478	PAP18089_05005	rhsh01000020_pro_88	rhsg01000018_pro_88	rwhx01000045_pro_16	pyya01000031_pro_54	rzmt01000032_pro_16	rzmu01000041_pro_16	rwhw01000050_pro_16	nbta01000005_pro_18	rses01000049_pro_16	rzmv01000050_pro_21	rqxy01000037_pro_46	rser01000030_pro_15	rrcr01000037_pro_46	rwhv01000060_pro_16	cp011279_pro_4151	cp010518_pro_4136	NA	PBR20603_04650	maos01000023_pro_67	PCA20602_01604, PCA20602_03231	PCA31118_01329, PCA31118_04862	B6_02220	PCE31106_00830	PCE31107_00924	PCO31010_01743, PCO31010_03132, PCO31010_05230	PCO31110_00135	PCO31111_04286	kb944454_pro_129	PEP31012_00928	cp011807_pro_146, cp011807_pro_822	jtcr01000014_pro_122, jtcr01000038_pro_60	jtcs01000030_pro_64, jtcs01000032_pro_12	PFI31113_00892, PFI31113_03398	PHO31112_03941, PHO31112_04571	PIN31009_00268, PIN31009_01080	PIN31115_01273, PIN31115_04503	PMO31116_00802, PMO31116_01449	cp013480_pro_966	PNO31109_03862	cp011253_pro_134, cp011253_pro_874, cp011518_pro_162	PPN31114_02284, PPN31114_03056	cp006900_pro_3278
OG0000103	NA	PAN31117_00735, PAN31117_01759, PAN31117_04145	PAN31108_02082	cp011501_pro_3287	cp013481_pro_3221	cp014018_pro_3612	PAP18089_04344	rhsh01000015_pro_76	rhsg01000015_pro_76	rwhx01000012_pro_10	pyya01000016_pro_11	rzmt01000013_pro_10	rzmu01000038_pro_36	rwhw01000045_pro_4	nbta01000017_pro_77	rses01000017_pro_4	rzmv01000043_pro_4	rqxy01000045_pro_4	rser01000015_pro_10	rrcr01000033_pro_10	rwhv01000046_pro_34	cp011279_pro_1651	cp010518_pro_1650	PAQ31011_00206, PAQ31011_00467, PAQ31011_04909	PBR20603_04341	maos01000034_pro_29	PCA20602_01112	PCA31118_00693, PCA31118_03730, PCA31118_04033	B6_01223	PCE31106_00637	PCE31107_00742, PCE31107_00834	PCO31010_00250, PCO31010_00525, PCO31010_01149	PCO31110_00044, PCO31110_02086	PCO31111_04572, PCO31111_04997	kb944426_pro_230, kb944454_pro_50	PEP31012_01083	cp011807_pro_2301	jtcr01000002_pro_66, jtcr01000013_pro_33	jtcs01000013_pro_66, jtcs01000025_pro_240	PFI31113_02640, PFI31113_03542	PHO31112_04240	PIN31009_00103	PIN31115_00311	PMO31116_04569	cp013480_pro_14	PNO31109_02272	cp011253_pro_2532	PPN31114_02125, PPN31114_02956	cp006900_pro_4241, cp006900_pro_605
OG0000104	NA	PAN31117_01679, PAN31117_03946, PAN31117_04548	PAN31108_00119, PAN31108_02917, PAN31108_03080	cp011501_pro_2605	cp013481_pro_2600	cp014018_pro_3007	PAP18089_04687	rhsh01000001_pro_200	rhsg01000001_pro_240	rwhx01000002_pro_83	pyya01000004_pro_85	rzmt01000006_pro_18	rzmu01000002_pro_117	rwhw01000001_pro_145	nbta01000023_pro_153	rses01000004_pro_13	rzmv01000003_pro_143	rqxy01000016_pro_71	rser01000002_pro_143	rrcr01000002_pro_117	rwhv01000004_pro_81	cp011279_pro_969	cp010518_pro_969	PAQ31011_00357, PAQ31011_02757, PAQ31011_04541	NA	maos01000027_pro_16, maos01000094_pro_146	PCA20602_00176, PCA20602_01008, PCA20602_04566	PCA31118_00787, PCA31118_03948, PCA31118_04126	B6_00653, B6_02868, B6_02869	PCE31106_00943, PCE31106_02921, PCE31106_04444	PCE31107_01296, PCE31107_02051, PCE31107_02120, PCE31107_02603	PCO31010_00370, PCO31010_02255, PCO31010_04820	NA	NA	NA	PEP31012_01791, PEP31012_02945, PEP31012_03958	NA	jtcr01000004_pro_110	jtcs01000003_pro_16	PFI31113_00491	PHO31112_03135	PIN31009_01784, PIN31009_02609	PIN31115_01972, PIN31115_03693	PMO31116_00287	cp013480_pro_2227, cp013480_pro_3436	PNO31109_00840	cp011253_pro_2424, cp011253_pro_3669	PPN31114_00603, PPN31114_01724, PPN31114_03133	NA
OG0000105	NA	PAN31117_00037	NA	cp011501_pro_482	cp013481_pro_4566	cp014018_pro_887	PAP18089_00504	rhsh01000005_pro_137	rhsg01000007_pro_138	rwhx01000004_pro_136	pyya01000002_pro_78	rzmt01000003_pro_233	rzmu01000003_pro_233	rwhw01000003_pro_156	nbta01000008_pro_76	rses01000010_pro_59	rzmv01000001_pro_77	rqxy01000010_pro_59	rser01000001_pro_231	rrcr01000001_pro_233	rwhv01000001_pro_143	cp011279_pro_3549	cp010518_pro_3532	PAQ31011_01406, PAQ31011_04031	PBR20603_00573	maos01000022_pro_16, maos01000040_pro_64, maos01000061_pro_131	PCA20602_01689	PCA31118_01414	B6_01107, B6_02250, B6_04567	PCE31106_00219, PCE31106_00979	PCE31107_00105, PCE31107_00335, PCE31107_02729, PCE31107_04508	PCO31010_01828, PCO31010_04095	PCO31110_00747	NA	kb944454_pro_761	PEP31012_01459	cp011807_pro_1403, cp011807_pro_229	jtcr01000005_pro_108, jtcr01000018_pro_72	jtcs01000016_pro_72, jtcs01000019_pro_108	PFI31113_02819, PFI31113_03213	PHO31112_00366	PIN31009_00355, PIN31009_03454, PIN31009_05112	PIN31115_00532, PIN31115_02910, PIN31115_05361	PMO31116_01367	cp013480_pro_1661, cp013480_pro_240, cp013480_pro_4822	PNO31109_00567	cp011253_pro_215, cp011253_pro_662	PPN31114_02372, PPN31114_05113	cp006900_pro_3821
OG0000106	NA	PAN31117_00177, PAN31117_00178	PAN31108_00718, PAN31108_00719	cp011501_pro_620	cp013481_pro_4427	cp014018_pro_1027	PAP18089_00646, PAP18089_00647	rhsh01000002_pro_33	rhsg01000003_pro_33	rwhx01000016_pro_3	pyya01000002_pro_217	rzmt01000003_pro_95	rzmu01000003_pro_95	rwhw01000003_pro_18	nbta01000008_pro_215, nbta01000008_pro_216	rses01000003_pro_78	rzmv01000001_pro_215	rqxy01000002_pro_78	rser01000001_pro_95	rrcr01000001_pro_95	rwhv01000001_pro_6	cp011279_pro_3688	cp010518_pro_3671	PAQ31011_01570, PAQ31011_01571	PBR20603_00434, PBR20603_00436	maos01000043_pro_38	PCA20602_01836, PCA20602_01837	PCA31118_01553, PCA31118_01554	B6_01400, B6_01401	PCE31106_00370, PCE31106_00371	PCE31107_00483, PCE31107_00484	PCO31010_01977, PCO31010_01978	PCO31110_00611, PCO31110_00612, PCO31110_04020	PCO31111_00432, PCO31111_00433	kb944454_pro_613, kb944454_pro_614	PEP31012_01333, PEP31012_01334	cp011807_pro_355	jtcr01000029_pro_17	jtcs01000006_pro_21	PFI31113_01782, PFI31113_01784	PHO31112_00216, PHO31112_00218	PIN31009_00523, PIN31009_00524	PIN31115_00701, PIN31115_00702	PMO31116_01224, PMO31116_01225	cp013480_pro_407	PNO31109_00438, PNO31109_00439	cp011253_pro_374	PPN31114_02526, PPN31114_02527	cp006900_pro_3690
OG0000107	NA	PAN31117_01727	PAN31108_00066	cp011501_pro_1175, cp011501_pro_3993	cp013481_pro_1005, cp013481_pro_3884	cp014018_pro_1572, cp014018_pro_4419	PAP18089_01866, PAP18089_04910	rhsh01000006_pro_61, rhsh01000025_pro_15	rhsg01000004_pro_248, rhsg01000021_pro_15	rwhx01000007_pro_81, rwhx01000080_pro_7	pyya01000008_pro_61, pyya01000049_pro_15	rzmt01000004_pro_213, rzmt01000047_pro_15	rzmu01000020_pro_80, rzmu01000047_pro_15	rwhw01000011_pro_76, rwhw01000093_pro_8	nbta01000005_pro_110, nbta01000023_pro_752	rses01000019_pro_76, rses01000086_pro_8	rzmv01000020_pro_81, rzmv01000070_pro_7	rqxy01000025_pro_11, rqxy01000083_pro_7	rser01000005_pro_79, rser01000053_pro_7	rrcr01000023_pro_11, rrcr01000056_pro_7	rwhv01000016_pro_75, rwhv01000087_pro_8	cp011279_pro_2357, cp011279_pro_4242	cp010518_pro_2356, cp010518_pro_4227	PAQ31011_00295	PBR20603_04712	maos01000036_pro_14, maos01000036_pro_43, maos01000039_pro_101	PCA20602_00954	PCA31118_01912	B6_02366	PCE31106_00880	PCE31107_00974	PCO31010_00308	PCO31110_02350, PCO31110_05107	PCO31111_01764, PCO31111_05072	kb944423_pro_549, kb944430_pro_14	PEP31012_00799	cp011807_pro_2184	jtcr01000009_pro_25	jtcs01000044_pro_42	PFI31113_01949	PHO31112_00887, PHO31112_05213	PIN31009_01541, PIN31009_03914	PIN31115_01723, PIN31115_04216	PMO31116_00702, PMO31116_03488	cp013480_pro_3689, cp013480_pro_4358	NA	cp011253_pro_2376	PPN31114_03464, PPN31114_04915	cp006900_pro_3183
OG0000108	NA	PAN31117_01757, PAN31117_03950	NA	cp011501_pro_1569, cp011501_pro_2356	cp013481_pro_2383, cp013481_pro_3440	cp014018_pro_1999, cp014018_pro_2741	PAP18089_04548, PAP18089_04769	rhsh01000012_pro_10, rhsh01000014_pro_23	rhsg01000010_pro_23, rhsg01000014_pro_10	rwhx01000023_pro_20, rwhx01000056_pro_19	pyya01000011_pro_10, pyya01000028_pro_20	rzmt01000001_pro_446, rzmt01000040_pro_9	rzmu01000010_pro_10, rzmu01000023_pro_20	rwhw01000052_pro_20, rwhw01000059_pro_19	nbta01000006_pro_206, nbta01000014_pro_214	rses01000032_pro_10, rses01000061_pro_20	rzmv01000004_pro_159, rzmv01000030_pro_10	rqxy01000007_pro_10, rqxy01000034_pro_5	rser01000031_pro_10, rser01000044_pro_20	rrcr01000011_pro_10, rrcr01000021_pro_20	rwhv01000021_pro_20, rwhv01000034_pro_11	cp011279_pro_4624, cp011279_pro_719	cp010518_pro_4609, cp010518_pro_719	PAQ31011_00226, PAQ31011_04545	PBR20603_03173	maos01000050_pro_181, maos01000050_pro_89, maos01000094_pro_150	PCA20602_03364, PCA20602_04570	PCA31118_01968	B6_03965	PCE31106_02978	PCE31107_02642	PCO31010_00255	NA	NA	NA	NA	NA	NA	NA	NA	PHO31112_03290, PHO31112_04944	PIN31009_02368, PIN31009_03753	PIN31115_03932, PIN31115_04141	PMO31116_00893	cp013480_pro_2453, cp013480_pro_2737	PNO31109_00090	cp011253_pro_2308	PPN31114_00848, PPN31114_01075	cp006900_pro_3358
OG0000109	NA	PAN31117_02866, PAN31117_02867	PAN31108_02399	cp011501_pro_1368, cp011501_pro_1553	cp013481_pro_3457, cp013481_pro_3683	cp014018_pro_1774, cp014018_pro_1982	PAP18089_03486, PAP18089_04786, PAP18089_04787	rhsh01000012_pro_27, rhsh01000013_pro_47	rhsg01000008_pro_188, rhsg01000014_pro_27	rwhx01000056_pro_2	pyya01000011_pro_27	rzmt01000040_pro_26	rzmu01000010_pro_27	rwhw01000059_pro_2	nbta01000014_pro_197, nbta01000014_pro_26	rses01000032_pro_26	rzmv01000030_pro_26	rqxy01000007_pro_27	NA	rrcr01000011_pro_27	rwhv01000034_pro_28	cp011279_pro_4423, cp011279_pro_4608	cp010518_pro_4408, cp010518_pro_4593	PAQ31011_04278	PBR20603_02111, PBR20603_03155	maos01000013_pro_66	PCA20602_03865	PCA31118_03224, PCA31118_03233	B6_03829, B6_03830	PCE31106_02008, PCE31106_02009	PCE31107_03135	PCO31010_03302	PCO31110_04514	PCO31111_02225	kb944425_pro_73, kb944443_pro_92	PEP31012_02694	cp011808_pro_99	jtcr01000004_pro_36, jtcr01000017_pro_17, jtcr01000019_pro_7	jtcs01000015_pro_22, jtcs01000021_pro_17, jtcs01000034_pro_59	PFI31113_00607, PFI31113_02091, PFI31113_02452	PHO31112_00720	PIN31009_01328	PIN31115_01514, PIN31115_04414	PMO31116_02930, PMO31116_02940	cp013480_pro_3896	PNO31109_01008, PNO31109_03384	NA	PPN31114_04715	cp006900_pro_2904, cp006900_pro_3036
OG0000110	NA	PAN31117_04329	PAN31108_03188, PAN31108_03387	cp011501_pro_2506	cp013481_pro_2494	cp014018_pro_2898	PAP18089_04087	rhsh01000001_pro_309	rhsg01000001_pro_349	rwhx01000037_pro_35, rwhx01000047_pro_6	pyya01000006_pro_121, pyya01000015_pro_61, pyya01000022_pro_35	rzmt01000004_pro_35, rzmt01000026_pro_6	rzmu01000008_pro_35, rzmu01000053_pro_19	rwhw01000010_pro_1, rwhw01000066_pro_18	nbta01000006_pro_48	rses01000006_pro_100, rses01000064_pro_6, rses01000115_pro_3	rzmv01000009_pro_100, rzmv01000026_pro_54	rqxy01000003_pro_35, rqxy01000062_pro_19	rser01000006_pro_37, rser01000009_pro_24, rser01000019_pro_64	rrcr01000008_pro_100, rrcr01000022_pro_6	rwhv01000048_pro_14, rwhv01000066_pro_6	cp011279_pro_870	cp010518_pro_870	PAQ31011_00163	PBR20603_01000	maos01000024_pro_16	PCA20602_04400	PCA31118_00926, PCA31118_05218	B6_01607	PCE31106_01483, PCE31106_01485, PCE31106_03331	PCE31107_00409, PCE31107_00411	PCO31010_01015	PCO31110_04494	PCO31111_02188	kb944424_pro_137	PEP31012_02092, PEP31012_02292	cp011807_pro_1305	jtcr01000004_pro_24	jtcs01000034_pro_71	PFI31113_00621	PHO31112_03769	PIN31009_02331	PIN31115_03953	PMO31116_00134, PMO31116_03903, PMO31116_03905	cp013480_pro_2493	PNO31109_00903	NA	PPN31114_00892	cp006900_pro_2031, cp006900_pro_2150
OG0000111	muhy01000001_pro_2	PAN31117_03705, PAN31117_04354	PAN31108_01119, PAN31108_03191	cp011501_pro_3625, cp011501_pro_3654	cp013481_pro_1353, cp013481_pro_1362	cp014018_pro_4060, cp014018_pro_4071	PAP18089_02689, PAP18089_02700	rhsh01000003_pro_306, rhsh01000003_pro_317	rhsg01000006_pro_305, rhsg01000006_pro_316	rwhx01000054_pro_9, rwhx01000070_pro_3	pyya01000030_pro_23, pyya01000030_pro_34	rzmt01000034_pro_18, rzmt01000034_pro_29	rzmu01000046_pro_9, rzmu01000055_pro_22	rwhw01000030_pro_29, rwhw01000030_pro_40	nbta01000003_pro_70, nbta01000003_pro_80	rses01000062_pro_17, rses01000062_pro_28	rzmv01000024_pro_44, rzmv01000024_pro_55	rqxy01000036_pro_22, rqxy01000036_pro_33	rser01000049_pro_29, rser01000064_pro_16	rrcr01000040_pro_16, rrcr01000040_pro_27	rwhv01000057_pro_29, rwhv01000071_pro_3	cp011279_pro_1989, cp011279_pro_2018	cp010518_pro_1988, cp010518_pro_2017	PAQ31011_03804	PBR20603_02658	maos01000057_pro_1	PCA20602_02349	PCA31118_00073, PCA31118_05066	B6_02344	PCE31106_02549	PCE31107_04164	PCO31010_04180	PCO31110_03642	PCO31111_03212	kb944431_pro_35	PEP31012_04032	cp011807_pro_3242	jtcr01000024_pro_105	jtcs01000037_pro_99	PFI31113_04241	PHO31112_04407	PIN31009_02491, PIN31009_04466	PIN31115_03430, PIN31115_03809	PMO31116_02287	cp013480_pro_1141, cp013480_pro_2342	PNO31109_03837	cp011253_pro_3500	PPN31114_04515	cp006900_pro_999
OG0000112	NA	PAN31117_02742, PAN31117_04834	PAN31108_05028	cp011501_pro_1133	cp013481_pro_3918, cp013481_pro_3924	cp014018_pro_1525	PAP18089_04952, PAP18089_04953	rhsh01000018_pro_71, rhsh01000025_pro_49, rhsh01000033_pro_52, rhsh01000047_pro_1	rhsg01000017_pro_71, rhsg01000021_pro_49, rhsg01000025_pro_52, rhsg01000035_pro_1	rwhx01000025_pro_57, rwhx01000055_pro_3, rwhx01000089_pro_4	pyya01000031_pro_5, pyya01000045_pro_23, pyya01000047_pro_3	rzmt01000044_pro_9, rzmt01000046_pro_3, rzmt01000068_pro_4	rzmu01000021_pro_9, rzmu01000060_pro_4, rzmu01000077_pro_3	rwhw01000106_pro_3, rwhw01000129_pro_3	NA	rses01000054_pro_3, rses01000082_pro_9, rses01000095_pro_4	rzmv01000065_pro_9, rzmv01000077_pro_4, rzmv01000082_pro_3	rqxy01000058_pro_3, rqxy01000077_pro_7, rqxy01000090_pro_4	rser01000020_pro_69, rser01000030_pro_62, rser01000051_pro_3	rrcr01000020_pro_60, rrcr01000082_pro_4, rrcr01000090_pro_3	rwhv01000059_pro_3, rwhv01000083_pro_9, rwhv01000096_pro_4	cp011279_pro_4200	cp010518_pro_4185	PAQ31011_02138, PAQ31011_03441, PAQ31011_04833	PBR20603_01975, PBR20603_03449	NA	NA	NA	NA	NA	PCE31107_03113, PCE31107_04072	PCO31010_01217, PCO31010_04833	PCO31110_00067, PCO31110_02103	PCO31111_03967, PCO31111_04625, PCO31111_04816, PCO31111_04921	kb944423_pro_238, kb944423_pro_248, kb944454_pro_62	PEP31012_00633	cp011807_pro_2454, cp011807_pro_4036	jtcr01000038_pro_16, jtcr01000040_pro_63, jtcr01000048_pro_47	jtcs01000001_pro_70, jtcs01000017_pro_140, jtcs01000032_pro_56	PFI31113_00600, PFI31113_01312, PFI31113_03563	PHO31112_02793, PHO31112_03524, PHO31112_04639, PHO31112_05380	PIN31009_03006	NA	NA	NA	NA	cp011518_pro_186	PPN31114_00274	NA
OG0000113	NA	PAN31117_02994, PAN31117_03707	PAN31108_02525, PAN31108_05023	cp011501_pro_1230	cp013481_pro_3827	cp014018_pro_1629	PAP18089_03641	rhsh01000010_pro_43	rhsg01000008_pro_43	rwhx01000006_pro_42	pyya01000010_pro_42	rzmt01000009_pro_42	rzmu01000024_pro_42	rwhw01000007_pro_41	nbta01000010_pro_43	rses01000008_pro_81	rzmv01000027_pro_42	rqxy01000009_pro_42	rser01000007_pro_40	rrcr01000007_pro_42	rwhv01000006_pro_42	cp011279_pro_4286	cp010518_pro_4271	PAQ31011_03806, PAQ31011_04149	PBR20603_02255	maos01000025_pro_17, maos01000031_pro_31	PCA20602_00565, PCA20602_03999, PCA20602_04859	PCA31118_03099, PCA31118_04951	B6_01690, B6_03742	PCE31106_02127	PCE31107_00819, PCE31107_02755, PCE31107_03261	PCO31010_03433, PCO31010_04177	PCO31110_01490, PCO31110_04858	PCO31111_03638	kb944425_pro_191, kb944435_pro_218	PEP31012_01789, PEP31012_01938, PEP31012_02562	cp011807_pro_955	jtcr01000022_pro_59	jtcs01000012_pro_59	PFI31113_04678	PHO31112_00601	PIN31009_01214	PIN31115_01402	PMO31116_02732, PMO31116_03054	cp013480_pro_4004	PNO31109_02516, PNO31109_04051	cp011253_pro_1005	PPN31114_04599	cp006900_pro_1373, cp006900_pro_3142
OG0000114	muhy01000001_pro_1	PAN31117_03706, PAN31117_04353	PAN31108_01118, PAN31108_03192	cp011501_pro_3626, cp011501_pro_3655	cp013481_pro_1352, cp013481_pro_1361	cp014018_pro_4061, cp014018_pro_4072	PAP18089_02688, PAP18089_02699	rhsh01000003_pro_307, rhsh01000003_pro_318	rhsg01000006_pro_306, rhsg01000006_pro_317	rwhx01000054_pro_10, rwhx01000070_pro_2	pyya01000030_pro_24, pyya01000030_pro_35	rzmt01000034_pro_19, rzmt01000034_pro_30	rzmu01000046_pro_10, rzmu01000055_pro_23	rwhw01000030_pro_28, rwhw01000030_pro_39	nbta01000003_pro_69, nbta01000003_pro_79	rses01000062_pro_18, rses01000062_pro_29	rzmv01000024_pro_45, rzmv01000024_pro_56	rqxy01000036_pro_23, rqxy01000036_pro_34	rser01000049_pro_28, rser01000064_pro_17	rrcr01000040_pro_17, rrcr01000040_pro_28	rwhv01000057_pro_28, rwhv01000071_pro_2	cp011279_pro_1990, cp011279_pro_2019	cp010518_pro_1989, cp010518_pro_2018	PAQ31011_03805	PBR20603_02657	maos01000057_pro_2	PCA20602_02350	PCA31118_00072, PCA31118_05067	B6_02345	PCE31106_02550	PCE31107_04165	PCO31010_04179	PCO31110_03641	PCO31111_03211	kb944431_pro_34	PEP31012_04031	cp011807_pro_3243	jtcr01000024_pro_106	jtcs01000037_pro_100	PFI31113_04240	PHO31112_04408	PIN31009_02490, PIN31009_04467	PIN31115_03431, PIN31115_03810	PMO31116_02288	cp013480_pro_1140, cp013480_pro_2343	PNO31109_03838	cp011253_pro_3501	PPN31114_04516	cp006900_pro_998
OG0000115	NA	PAN31117_00677, PAN31117_05164	NA	cp011501_pro_1545, cp011501_pro_2638	cp013481_pro_2634, cp013481_pro_3466	cp014018_pro_1973, cp014018_pro_3041	PAP18089_04721, PAP18089_04796	rhsh01000001_pro_166, rhsh01000012_pro_36	rhsg01000001_pro_206, rhsg01000014_pro_36	rwhx01000002_pro_117, rwhx01000087_pro_8	pyya01000004_pro_119, pyya01000011_pro_36	rzmt01000006_pro_52, rzmt01000040_pro_35	rzmu01000002_pro_151, rzmu01000010_pro_36	rwhw01000001_pro_111, rwhw01000060_pro_8	nbta01000014_pro_188, nbta01000023_pro_187	rses01000004_pro_47, rses01000032_pro_35	rzmv01000003_pro_109, rzmv01000030_pro_35	rqxy01000007_pro_36, rqxy01000016_pro_37	rser01000002_pro_109, rser01000031_pro_34	rrcr01000002_pro_151, rrcr01000011_pro_36	rwhv01000004_pro_115, rwhv01000034_pro_36	cp011279_pro_1002, cp011279_pro_4600	cp010518_pro_1002, cp010518_pro_4585	PAQ31011_00406, PAQ31011_04807	PBR20603_03145	maos01000034_pro_83	PCA20602_01052	PCA31118_00744	B6_00169	PCE31106_01324	PCE31107_02034	PCO31010_00416, PCO31010_01260	PCO31110_00027	PCO31111_04974	kb944454_pro_33	PEP31012_03876	cp011807_pro_2249	jtcr01000002_pro_71, jtcr01000004_pro_138	jtcs01000003_pro_44, jtcs01000013_pro_71	PFI31113_00459, PFI31113_02646	NA	PIN31009_00805, PIN31009_02671	PIN31115_00975, PIN31115_03623	PMO31116_00309	cp013480_pro_2161, cp013480_pro_697	NA	cp011253_pro_2471	PPN31114_00548, PPN31114_02789	cp006900_pro_1886
OG0000116	NA	PAN31117_00760, PAN31117_01795, PAN31117_03315	PAN31108_00218, PAN31108_04711	cp011501_pro_2712	cp013481_pro_2710	cp014018_pro_3118	PAP18089_02269	rhsh01000001_pro_90	rhsg01000001_pro_130	rwhx01000002_pro_192	pyya01000027_pro_34	rzmt01000006_pro_127	rzmu01000002_pro_225	rwhw01000001_pro_36, rwhw01000123_pro_1	nbta01000010_pro_177, nbta01000023_pro_262	rses01000004_pro_122	rzmv01000003_pro_35	NA	rser01000002_pro_36	NA	rwhv01000014_pro_36	cp011279_pro_1076	cp010518_pro_1076	PAQ31011_00195, PAQ31011_00498	NA	maos01000042_pro_45	PCA20602_01153	PCA31118_00671, PCA31118_01676, PCA31118_03371	B6_00220, B6_04503	PCE31106_01657	PCE31107_01990, PCE31107_02855	PCO31010_00556	PCO31110_01345, PCO31110_02748	PCO31111_02807	kb944435_pro_62	PEP31012_01633	cp011807_pro_2320	jtcr01000004_pro_197, jtcr01000013_pro_54	jtcs01000003_pro_103, jtcs01000025_pro_219	PFI31113_00396, PFI31113_03586	PHO31112_03678	PIN31009_01138, PIN31009_02767	PIN31115_01329, PIN31115_03523	PMO31116_00359	cp013480_pro_1025, cp013480_pro_2071	PNO31109_00778	cp011253_pro_2553	PPN31114_00452, PPN31114_03119	cp006900_pro_1847
OG0000117	NA	PAN31117_00392, PAN31117_02379, PAN31117_03965	PAN31108_02931	cp011501_pro_2371	cp013481_pro_2398	cp014018_pro_2756	PAP18089_04564	rhsh01000014_pro_8	rhsg01000010_pro_8	rwhx01000023_pro_5	pyya01000028_pro_5	rzmt01000001_pro_461	rzmu01000023_pro_5	rwhw01000052_pro_5	nbta01000006_pro_191	rses01000061_pro_5	rzmv01000004_pro_173	rqxy01000084_pro_12	rser01000044_pro_5	rrcr01000021_pro_5	rwhv01000021_pro_5	cp011279_pro_734	cp010518_pro_734	PAQ31011_01794, PAQ31011_04555	PBR20603_03636	maos01000001_pro_304, maos01000094_pro_160	PCA20602_04580, PCA20602_04632, PCA20602_05010	PCA31118_00083, PCA31118_01828, PCA31118_03961	B6_00060	PCE31106_04613	PCE31107_03696	PCO31010_03559, PCO31010_04828	PCO31110_02934	PCO31111_03400	kb944423_pro_7	NA	cp011807_pro_1976, cp011807_pro_568	jtcr01000031_pro_65, jtcr01000037_pro_68	jtcs01000026_pro_68, jtcs01000038_pro_26	PFI31113_01576, PFI31113_03649	PHO31112_05167	PIN31009_02385, PIN31009_03766	PIN31115_03915, PIN31115_04128	PMO31116_03497	cp013480_pro_2436, cp013480_pro_2723	PNO31109_00234, PNO31109_02499	cp011253_pro_2119, cp011253_pro_596	PPN31114_01063, PPN31114_04900	cp006900_pro_2137
OG0000118	NA	PAN31117_05100	NA	NA	cp013481_pro_788	NA	PAP18089_03190	NA	NA	rwhx01000103_pro_3	pyya01000069_pro_3	rzmt01000078_pro_3	rzmu01000081_pro_3	rwhw01000151_pro_1	nbta01000004_pro_294	rses01000119_pro_3	rzmv01000087_pro_1	rqxy01000106_pro_3	rser01000096_pro_3	rrcr01000098_pro_3	rwhv01000111_pro_3	NA	NA	NA	NA	maos01000020_pro_19	NA	NA	NA	PCE31106_04778	NA	NA	PCO31110_02442	NA	kb944434_pro_172	PEP31012_03977, PEP31012_04679	cp011807_pro_2841, cp011807_pro_4002, cp011808_pro_144, cp011808_pro_173, cp011808_pro_22, cp011808_pro_250, cp011808_pro_260, cp011809_pro_83	NA	NA	PFI31113_03142, PFI31113_03143, PFI31113_03144	PHO31112_05318	PIN31009_05300	PIN31115_04443, PIN31115_05508	NA	NA	NA	cp011253_pro_288, cp011253_pro_2896, cp011253_pro_3090, cp011253_pro_4181, cp011253_pro_4450, cp011253_pro_4453, cp011253_pro_923, cp011253_pro_956, cp011518_pro_190, cp011518_pro_196, cp011518_pro_276, cp011518_pro_288, cp011518_pro_293, cp011518_pro_323, cp011518_pro_41, cp011518_pro_410, cp011518_pro_411, cp011518_pro_5, cp011518_pro_6, cp011518_pro_7	NA	NA
OG0000119	NA	PAN31117_00465	PAN31108_00210, PAN31108_04243	cp011501_pro_2703, cp011501_pro_867	cp013481_pro_2702, cp013481_pro_4173	cp014018_pro_1279, cp014018_pro_3109	PAP18089_00903, PAP18089_02260	rhsh01000001_pro_99, rhsh01000002_pro_287	rhsg01000001_pro_139, rhsg01000003_pro_288	rwhx01000002_pro_183, rwhx01000029_pro_10	pyya01000007_pro_9, pyya01000027_pro_43	rzmt01000006_pro_118, rzmt01000030_pro_53	rzmu01000002_pro_216, rzmu01000025_pro_54	rwhw01000001_pro_45, rwhw01000021_pro_9	nbta01000008_pro_469, nbta01000023_pro_253	rses01000004_pro_113, rses01000031_pro_9	rzmv01000003_pro_44, rzmv01000031_pro_54	rqxy01000030_pro_9	rser01000002_pro_45, rser01000058_pro_19	rrcr01000030_pro_54	rwhv01000014_pro_45, rwhv01000025_pro_54	cp011279_pro_1067, cp011279_pro_3935	cp010518_pro_1067, cp010518_pro_3918	PAQ31011_01870	PBR20603_00184	maos01000001_pro_232, maos01000042_pro_53	PCA20602_01144, PCA20602_04949	PCA31118_01895	B6_00691	PCE31106_00605	PCE31107_00717	PCO31010_03627	PCO31110_00354, PCO31110_01337	PCO31111_00189, PCO31111_02799	kb944435_pro_54, kb944454_pro_356	PEP31012_01107	cp011807_pro_625	jtcr01000011_pro_34	jtcs01000008_pro_34	PFI31113_01516	PHO31112_02248, PHO31112_03686	PIN31009_00844, PIN31009_01526	PIN31115_01014, PIN31115_01708	PMO31116_00989	cp013480_pro_3704, cp013480_pro_737	NA	cp011253_pro_1273	PPN31114_02816	cp006900_pro_3458
OG0000120	NA	PAN31117_01666, PAN31117_03169	PAN31108_00129	cp011501_pro_1737, cp011501_pro_2615	cp013481_pro_2610, cp013481_pro_3263	cp014018_pro_2175, cp014018_pro_3017	PAP18089_04697, PAP18089_05201	rhsh01000001_pro_190, rhsh01000028_pro_15	rhsg01000001_pro_230, rhsg01000002_pro_50	rwhx01000002_pro_93, rwhx01000005_pro_33	pyya01000001_pro_103, pyya01000004_pro_95	rzmt01000006_pro_28, rzmt01000020_pro_33	rzmu01000001_pro_33, rzmu01000002_pro_127	rwhw01000001_pro_135, rwhw01000005_pro_16	nbta01000015_pro_50, nbta01000023_pro_163	rses01000004_pro_23, rses01000021_pro_26	rzmv01000003_pro_133, rzmv01000022_pro_33	rqxy01000016_pro_61, rqxy01000023_pro_26	rser01000002_pro_133, rser01000026_pro_26	rrcr01000002_pro_127, rrcr01000018_pro_26	rwhv01000004_pro_91, rwhv01000018_pro_55	cp011279_pro_101, cp011279_pro_979	cp010518_pro_101, cp010518_pro_979	PAQ31011_00372, PAQ31011_03035	PBR20603_01580	maos01000028_pro_204, maos01000039_pro_175	PCA20602_01022, PCA20602_02926	PCA31118_00776, PCA31118_04755	NA	NA	NA	PCO31010_00382, PCO31010_02673	PCO31110_02268	PCO31111_03937	kb944439_pro_109	NA	cp011807_pro_1422	jtcr01000014_pro_163	jtcs01000030_pro_23	PFI31113_00842	PHO31112_03126, PHO31112_04803	PIN31009_01791, PIN31009_02626	PIN31115_01979, PIN31115_03676	PMO31116_02366	cp013480_pro_2210, cp013480_pro_3429	NA	cp011253_pro_2435	PPN31114_00589, PPN31114_01717	cp006900_pro_2728
OG0000121	NA	PAN31117_02438, PAN31117_03544	PAN31108_01281	cp011501_pro_3475	cp013481_pro_1514	cp014018_pro_3905	PAP18089_02858	rhsh01000003_pro_153	rhsg01000006_pro_152	rwhx01000041_pro_2	pyya01000038_pro_2	rzmt01000007_pro_131	rzmu01000039_pro_1	rwhw01000046_pro_1	nbta01000013_pro_132	rses01000046_pro_1	rzmv01000007_pro_38	rqxy01000019_pro_94	rser01000042_pro_1	rrcr01000016_pro_1	NA	cp011279_pro_1839	cp010518_pro_1838	PAQ31011_03647, PAQ31011_03982	PBR20603_02811	maos01000050_pro_156, maos01000058_pro_28, maos01000071_pro_16	PCA20602_00727, PCA20602_02187, PCA20602_03409	PCA31118_03365, PCA31118_04357	B6_02658	PCE31106_02426	PCE31107_03332	PCO31010_04058, PCO31010_04348	PCO31110_01872, PCO31110_03795	PCO31111_03357, PCO31111_04408	kb944426_pro_72, kb944431_pro_185	PEP31012_04418	cp011807_pro_1241, cp011807_pro_3090	jtcr01000001_pro_45, jtcr01000051_pro_34	jtcs01000025_pro_26, jtcs01000028_pro_12	PFI31113_00256, PFI31113_04620	PHO31112_04010, PHO31112_04492	PIN31009_01495, PIN31009_04299	PIN31115_01677, PIN31115_03271	PMO31116_02143	cp013480_pro_1299, cp013480_pro_3735	PNO31109_01824, PNO31109_03547	cp011253_pro_1310, cp011253_pro_3347	PPN31114_04354, PPN31114_04874	cp006900_pro_1119
OG0000122	NA	NA	PAN31108_00612, PAN31108_02185, PAN31108_04850, PAN31108_04851, PAN31108_04943	cp011501_pro_1377, cp011501_pro_2126, cp011501_pro_4189	cp013481_pro_3546, cp013481_pro_808	cp014018_pro_1914	PAP18089_03184	rhsh01000041_pro_9	rhsg01000030_pro_17	rwhx01000023_pro_44, rwhx01000037_pro_21, rwhx01000076_pro_2	pyya01000001_pro_28, pyya01000022_pro_21, pyya01000028_pro_45	rzmt01000001_pro_422, rzmt01000004_pro_21, rzmt01000057_pro_2	rzmu01000008_pro_21, rzmu01000023_pro_44, rzmu01000050_pro_15	rwhw01000068_pro_37, rwhw01000138_pro_1	nbta01000004_pro_299, nbta01000022_pro_102	rses01000006_pro_114, rses01000042_pro_14, rses01000058_pro_27	rzmv01000004_pro_135, rzmv01000009_pro_114, rzmv01000045_pro_26	rqxy01000003_pro_21, rqxy01000034_pro_29, rqxy01000060_pro_15	rser01000009_pro_10, rser01000045_pro_24, rser01000052_pro_1	rrcr01000008_pro_114, rrcr01000021_pro_44, rrcr01000057_pro_27	rwhv01000021_pro_44, rwhv01000048_pro_28, rwhv01000061_pro_15	cp011279_pro_2553, cp011279_pro_4432, cp011279_pro_489	cp010518_pro_2552, cp010518_pro_4417, cp010518_pro_489	NA	PBR20603_02081, PBR20603_03852	maos01000013_pro_77	NA	PCA31118_02510, PCA31118_05236	NA	PCE31106_00935	PCE31107_04209	PCO31010_03821, PCO31010_04564	PCO31110_02902, PCO31110_04740, PCO31110_04741	PCO31111_01422, PCO31111_02444, PCO31111_02611, PCO31111_03512, PCO31111_03513, PCO31111_04694	NA	NA	NA	NA	NA	NA	PHO31112_02905	PIN31009_01857, PIN31009_05583	PIN31115_02045, PIN31115_03043, PIN31115_05234	PMO31116_02676	cp013480_pro_3002	PNO31109_03003	cp011253_pro_1143	PPN31114_03979	cp006900_pro_2166, cp006900_pro_288
OG0000123	NA	PAN31117_04080, PAN31117_04836, PAN31117_05357	NA	cp011501_pro_1131	cp013481_pro_3060, cp013481_pro_3248, cp013481_pro_3926	NA	PAP18089_04954	rhsh01000017_pro_5, rhsh01000019_pro_59, rhsh01000020_pro_42, rhsh01000033_pro_50, rhsh01000034_pro_3	rhsg01000011_pro_134, rhsg01000013_pro_128, rhsg01000016_pro_4, rhsg01000018_pro_42, rhsg01000025_pro_50	rwhx01000055_pro_1, rwhx01000089_pro_6	pyya01000031_pro_7, pyya01000047_pro_1	rzmt01000046_pro_1, rzmt01000068_pro_6	rzmu01000077_pro_1	rwhw01000106_pro_5, rwhw01000129_pro_1	nbta01000015_pro_25	rses01000054_pro_1, rses01000095_pro_2	rzmv01000082_pro_1	rqxy01000058_pro_1, rqxy01000090_pro_2	rser01000030_pro_60, rser01000051_pro_1	rrcr01000082_pro_2, rrcr01000090_pro_1	rwhv01000059_pro_1, rwhv01000096_pro_2	cp011279_pro_4198	cp010518_pro_4183	PAQ31011_02136	PBR20603_03447	NA	PCA20602_05101	NA	B6_01686, B6_03672	NA	PCE31107_03111, PCE31107_04074, PCE31107_04670	NA	PCO31110_00069, PCO31110_01776, PCO31110_01777	PCO31111_03969, PCO31111_04223, PCO31111_04531	kb944425_pro_55, kb944454_pro_64	PEP31012_00631, PEP31012_00882, PEP31012_03668	cp011807_pro_868	jtcr01000038_pro_17, jtcr01000048_pro_46	jtcs01000001_pro_69, jtcs01000032_pro_55	NA	PHO31112_03316, PHO31112_04637, PHO31112_04646	NA	PIN31115_01913	PMO31116_04098	cp013480_pro_3485	NA	NA	NA	cp006900_pro_2757
OG0000124	NA	PAN31117_00558, PAN31117_02419	NA	cp011501_pro_946	cp013481_pro_4091	cp014018_pro_1360	PAP18089_00987	rhsh01000002_pro_366	rhsg01000003_pro_367	rwhx01000009_pro_42	pyya01000024_pro_71	rzmt01000005_pro_70	rzmu01000005_pro_70	rwhw01000008_pro_13	nbta01000021_pro_73	rses01000014_pro_19	rzmv01000005_pro_99	rqxy01000005_pro_42	rser01000011_pro_70	rrcr01000010_pro_70	rwhv01000008_pro_69	cp011279_pro_4014	cp010518_pro_3997	PAQ31011_01962, PAQ31011_04015	PBR20603_00100	maos01000001_pro_140	PCA20602_03089	PCA31118_02007	B6_02362, B6_03999, B6_04538	PCE31106_00690, PCE31106_00876	PCE31107_00795, PCE31107_00970	PCO31010_03712	PCO31110_00042, PCO31110_00245	PCO31111_00091, PCO31111_04970	kb944454_pro_245, kb944454_pro_48	PEP31012_01045	cp011807_pro_715	jtcr01000023_pro_23	jtcs01000008_pro_109	PFI31113_01427	PHO31112_02134	PIN31009_00945, PIN31009_02380	PIN31115_01139, PIN31115_03920	PMO31116_00914	cp013480_pro_2441, cp013480_pro_842	PNO31109_00107	cp011253_pro_1305, cp011253_pro_759	PPN31114_02921	cp006900_pro_3389
OG0000125	muhy01000001_pro_18	PAN31117_03647	PAN31108_01177	cp011501_pro_3569	cp013481_pro_1420	cp014018_pro_4001	PAP18089_02759	rhsh01000003_pro_248	rhsg01000006_pro_247	rwhx01000031_pro_14	pyya01000018_pro_15	rzmt01000007_pro_37	rzmu01000016_pro_14	rwhw01000020_pro_14	nbta01000013_pro_37	rses01000029_pro_14	rzmv01000007_pro_132	rqxy01000015_pro_14	rser01000063_pro_14	rrcr01000031_pro_14	rwhv01000012_pro_14	cp011279_pro_1933	cp010518_pro_1932	PAQ31011_00230, PAQ31011_03746	PBR20603_02717, PBR20603_03795, PBR20603_04479	maos01000037_pro_54	PCA20602_02291	PCA31118_00887, PCA31118_04457	B6_02402	PCE31106_02493	PCE31107_04106	PCO31010_00259, PCO31010_04238	PCO31110_00972, PCO31110_03701	PCO31111_00769, PCO31111_03018, PCO31111_03270	kb944431_pro_95, kb944454_pro_984	PEP31012_04088	cp011807_pro_2129, cp011807_pro_3183	jtcr01000024_pro_52, jtcr01000027_pro_42	jtcs01000018_pro_42, jtcs01000037_pro_46	PFI31113_00543, PFI31113_03060, PFI31113_04299	PHO31112_04346, PHO31112_04947	PIN31009_04408	PIN31115_03372	PMO31116_02225	cp013480_pro_1201	PNO31109_03780	cp011253_pro_2313, cp011253_pro_3443	PPN31114_04458	cp006900_pro_1052, cp006900_pro_170
OG0000126	NA	PAN31117_00676	NA	cp011501_pro_1549, cp011501_pro_2637	cp013481_pro_2633, cp013481_pro_3462	cp014018_pro_1977, cp014018_pro_3040	PAP18089_04720, PAP18089_04792	rhsh01000001_pro_167, rhsh01000012_pro_32	rhsg01000001_pro_207, rhsg01000014_pro_32	rwhx01000002_pro_116, rwhx01000087_pro_4	pyya01000004_pro_118, pyya01000011_pro_32	rzmt01000006_pro_51, rzmt01000040_pro_31	rzmu01000002_pro_150, rzmu01000010_pro_32	rwhw01000001_pro_112, rwhw01000060_pro_4	nbta01000014_pro_192, nbta01000023_pro_186	rses01000004_pro_46, rses01000032_pro_31	rzmv01000003_pro_110, rzmv01000030_pro_31	rqxy01000007_pro_32, rqxy01000016_pro_38	rser01000002_pro_110, rser01000031_pro_30	rrcr01000002_pro_150, rrcr01000011_pro_32	rwhv01000004_pro_114, rwhv01000034_pro_32	cp011279_pro_1001, cp011279_pro_4604	cp010518_pro_1001, cp010518_pro_4589	PAQ31011_00405	PBR20603_03150	maos01000034_pro_84	PCA20602_01051	PCA31118_00745	B6_00168, B6_00730	PCE31106_00565	PCE31107_00678, PCE31107_02035	PCO31010_00415	PCO31110_02756	NA	kb944454_pro_692	PEP31012_03877	cp011807_pro_2248	jtcr01000002_pro_75, jtcr01000004_pro_137, jtcr01000028_pro_43	jtcs01000003_pro_43, jtcs01000013_pro_75, jtcs01000023_pro_43	PFI31113_00460, PFI31113_02650	PHO31112_00294	PIN31009_02670	PIN31115_03624	PMO31116_00308, PMO31116_03808	cp013480_pro_2162	NA	cp011253_pro_2470	PPN31114_00549	cp006900_pro_1887
OG0000127	NA	PAN31117_01639, PAN31117_01796	NA	cp011501_pro_3870	cp013481_pro_1132, cp013481_pro_445	cp014018_pro_4293	PAP18089_02042	rhsh01000022_pro_67	rhsg01000004_pro_123	rwhx01000063_pro_30	pyya01000044_pro_30	rzmt01000033_pro_4	rzmu01000009_pro_118	rwhw01000065_pro_3, rwhw01000123_pro_3	nbta01000023_pro_625	rses01000063_pro_3	rzmv01000029_pro_30, rzmv01000029_pro_51	rqxy01000065_pro_30	rser01000056_pro_30	rrcr01000019_pro_79	rwhv01000065_pro_30	cp011279_pro_2234	cp010518_pro_2233	PAQ31011_00194, PAQ31011_02712	PBR20603_02463	maos01000029_pro_26	PCA20602_00223	PCA31118_02141	B6_00894, B6_02180, B6_03558	PCE31106_01088, PCE31106_01226, PCE31106_04726, PCE31106_04729	PCE31107_01433, PCE31107_01597	PCO31010_02301	PCO31110_03413, PCO31110_04158	PCO31111_01620	kb944452_pro_197	PEP31012_00036, PEP31012_00308	cp011807_pro_3454	jtcr01000009_pro_154, jtcr01000028_pro_46	jtcs01000022_pro_135, jtcs01000023_pro_46	PFI31113_04845	PHO31112_01486	PIN31009_04057	PIN31115_04359	PMO31116_03187	cp013480_pro_4226	PNO31109_03486	cp011253_pro_3715	PPN31114_03323	cp006900_pro_726
OG0000128	NA	PAN31117_02744, PAN31117_04136, PAN31117_05359	PAN31108_05029	cp011501_pro_1134	cp013481_pro_3923	NA	NA	rhsh01000017_pro_1, rhsh01000033_pro_53, rhsh01000038_pro_18	rhsg01000025_pro_53, rhsg01000027_pro_19	rwhx01000093_pro_1	pyya01000031_pro_4, pyya01000060_pro_12	rzmt01000061_pro_1	rzmu01000069_pro_12	NA	NA	rses01000116_pro_1	rzmv01000014_pro_95	rqxy01000087_pro_11, rqxy01000090_pro_5	rser01000092_pro_1	rrcr01000078_pro_11, rrcr01000082_pro_5	rwhv01000108_pro_1	cp011279_pro_4201	cp010518_pro_4186	PAQ31011_02139, PAQ31011_03443, PAQ31011_04842	NA	NA	PCA20602_01546, PCA20602_04414	NA	NA	NA	NA	PCO31010_01209, PCO31010_05181	PCO31110_00065, PCO31110_02094, PCO31110_02664	PCO31111_04634, PCO31111_04815, PCO31111_05074	kb944423_pro_247, kb944454_pro_61	PEP31012_01766	NA	jtcr01000021_pro_1	jtcs01000017_pro_139	PFI31113_03554	PHO31112_03313, PHO31112_03535, PHO31112_05389	PIN31009_01127, PIN31009_02997	PIN31115_01320	NA	cp013480_pro_1016, cp013480_pro_1692	NA	cp011253_pro_1883, cp011253_pro_4624	PPN31114_00283, PPN31114_03111	NA
OG0000129	NA	PAN31117_00550, PAN31117_00551, PAN31117_00552, PAN31117_00553, PAN31117_00554	PAN31108_03452, PAN31108_03453, PAN31108_03454	NA	NA	NA	NA	NA	NA	NA	NA	NA	NA	NA	NA	NA	NA	NA	NA	NA	NA	NA	NA	PAQ31011_01952, PAQ31011_01956, PAQ31011_01957, PAQ31011_01958	NA	maos01000001_pro_144, maos01000001_pro_145, maos01000001_pro_146	PCA20602_03083, PCA20602_03084, PCA20602_03085	PCA31118_02001, PCA31118_02002, PCA31118_02003	NA	NA	NA	PCO31010_03700, PCO31010_03701, PCO31010_03702, PCO31010_03703, PCO31010_03704, PCO31010_03705, PCO31010_03706, PCO31010_03707, PCO31010_03708	NA	NA	NA	NA	cp011807_pro_711	NA	NA	NA	NA	PIN31009_03687, PIN31009_03689	PIN31115_05177, PIN31115_05179	PMO31116_00918, PMO31116_00919, PMO31116_00920	cp013480_pro_2801, cp013480_pro_2802, cp013480_pro_2804	NA	cp011253_pro_753, cp011253_pro_754, cp011253_pro_755	PPN31114_01133, PPN31114_01134, PPN31114_01136	cp006900_pro_3393, cp006900_pro_3394, cp006900_pro_3395
OG0000130	NA	PAN31117_01285, PAN31117_01793	PAN31108_04004, PAN31108_04066, PAN31108_04719	cp011501_pro_4268	cp013481_pro_722	cp014018_pro_11	PAP18089_03277	rhsh01000008_pro_34	rhsg01000009_pro_35	rwhx01000019_pro_30	pyya01000026_pro_30	rzmt01000028_pro_14	rzmu01000022_pro_30	rwhw01000014_pro_30	nbta01000004_pro_213	rses01000045_pro_25	rzmv01000025_pro_61	rqxy01000047_pro_30	rser01000028_pro_44	rrcr01000048_pro_30	rwhv01000019_pro_29	cp011279_pro_2632	cp010518_pro_2631	PAQ31011_00203, PAQ31011_02336	PBR20603_03779	maos01000035_pro_19, maos01000076_pro_5	PCA20602_00511, PCA20602_00581	PCA31118_02578	B6_01017, B6_04037	PCE31106_04673	PCE31107_01121	PCO31010_00207, PCO31010_05097	PCO31110_03086	PCO31111_03034	kb944428_pro_95, kb944457_pro_250	PEP31012_00657	cp011807_pro_3756	jtcr01000019_pro_72	jtcs01000047_pro_55	PFI31113_02175	PHO31112_01847	PIN31009_04654	PIN31115_04836	PMO31116_00168, PMO31116_01849	cp013480_pro_4579	PNO31109_01277	cp011253_pro_1285, cp011253_pro_4039	PPN31114_03749	cp006900_pro_2009
OG0000131	NA	PAN31117_04211	PAN31108_03651, PAN31108_04901	cp011501_pro_3218	cp013481_pro_3153, cp013481_pro_448	cp014018_pro_3545	PAP18089_04275	rhsh01000015_pro_9	rhsg01000015_pro_9	rwhx01000012_pro_80, rwhx01000060_pro_26	pyya01000016_pro_79	rzmt01000013_pro_80, rzmt01000063_pro_6	rzmu01000033_pro_33	rwhw01000038_pro_9	nbta01000017_pro_9	rses01000017_pro_74	rzmv01000039_pro_33	rqxy01000041_pro_33	rser01000015_pro_73	rrcr01000042_pro_33	rwhv01000040_pro_9	cp011279_pro_1582	cp010518_pro_1581	PAQ31011_04921	PBR20603_01461, PBR20603_04535	maos01000061_pro_162	PCA20602_04270	PCA31118_00156, PCA31118_01670	B6_00453, B6_03546, B6_04583	PCE31106_03216, PCE31106_04712	PCE31107_04491	PCO31010_01136	PCO31110_02018, PCO31110_04155	PCO31111_04803	kb944426_pro_161	PEP31012_03744, PEP31012_04339	cp011807_pro_2720	jtcr01000020_pro_26	jtcs01000014_pro_26	PFI31113_03489	PHO31112_05261	PIN31009_03389	PIN31115_02972	PMO31116_02775	cp013480_pro_1590	PNO31109_03623	cp011253_pro_3052	PPN31114_00796, PPN31114_04059	cp006900_pro_1406, cp006900_pro_887
OG0000132	NA	PAN31117_04360	PAN31108_05248	cp011501_pro_2378, cp011501_pro_3330	cp013481_pro_1667, cp013481_pro_2405	cp014018_pro_2763, cp014018_pro_3753	PAP18089_04571	rhsh01000076_pro_1	rhsg01000049_pro_2	rwhx01000114_pro_1	pyya01000077_pro_1	rzmt01000089_pro_1	rzmu01000093_pro_1	rwhw01000166_pro_1	nbta01000006_pro_184, nbta01000017_pro_195	rses01000138_pro_1	rzmv01000089_pro_2	rqxy01000122_pro_1	rser01000109_pro_1	rrcr01000112_pro_1	rwhv01000122_pro_1	cp011279_pro_1694, cp011279_pro_741	cp010518_pro_1693, cp010518_pro_741	PAQ31011_04560, PAQ31011_04776	NA	NA	PCA20602_05114	NA	NA	PCE31106_01354, PCE31106_04619	PCE31107_04689	PCO31010_01288	PCO31110_04356	NA	kb944423_pro_1, kb944444_pro_148, kb944445_pro_1	PEP31012_04683	cp011807_pro_1981, cp011807_pro_2891	jtcr01000013_pro_95, jtcr01000037_pro_74	jtcs01000025_pro_178, jtcs01000026_pro_74	PFI31113_03627	PHO31112_05434	PIN31009_03279, PIN31009_03773	PIN31115_03092, PIN31115_04121	PMO31116_00001, PMO31116_04628	cp013480_pro_1469, cp013480_pro_2716	PNO31109_04325	cp011253_pro_2124, cp011253_pro_3194	PPN31114_01056, PPN31114_04178	cp006900_pro_1258, cp006900_pro_2133
OG0000133	NA	PAN31117_04361	PAN31108_01472	cp011501_pro_2379, cp011501_pro_3331	cp013481_pro_1666, cp013481_pro_2406	cp014018_pro_2764, cp014018_pro_3754	PAP18089_05343	rhsh01000079_pro_1	rhsg01000049_pro_1	rwhx01000115_pro_1	pyya01000079_pro_2	rzmt01000092_pro_1	rzmu01000095_pro_1	rwhw01000173_pro_1	nbta01000006_pro_183, nbta01000017_pro_196	rses01000142_pro_1	rzmv01000089_pro_1	rqxy01000124_pro_1	rser01000115_pro_1	rrcr01000116_pro_1	rwhv01000125_pro_1	cp011279_pro_1695, cp011279_pro_742	cp010518_pro_1694, cp010518_pro_742	PAQ31011_05305	PBR20603_00865	NA	PCA20602_00726	PCA31118_01087	NA	PCE31106_01355, PCE31106_04620	PCE31107_02257	PCO31010_00001	PCO31110_04357	NA	kb944424_pro_1, kb944444_pro_147	NA	cp011807_pro_1982, cp011807_pro_2892	jtcr01000013_pro_96, jtcr01000037_pro_75	jtcs01000025_pro_177, jtcs01000026_pro_75	PFI31113_00763, PFI31113_03628	PHO31112_05433	PIN31009_03278, PIN31009_03774	PIN31115_03093, PIN31115_04120	PMO31116_00002, PMO31116_04629	cp013480_pro_1468, cp013480_pro_2715	PNO31109_04326	cp011253_pro_2125, cp011253_pro_3195	PPN31114_01055, PPN31114_04179	cp006900_pro_1257, cp006900_pro_2132
OG0000134	NA	PAN31117_05058, PAN31117_05117, PAN31117_05118, PAN31117_05130	NA	cp011501_pro_1169	cp013481_pro_1269, cp013481_pro_3073, cp013481_pro_3890	cp014018_pro_1566, cp014018_pro_3465, cp014018_pro_4154	PAP18089_02184, PAP18089_04190, PAP18089_04916	rhsh01000017_pro_18, rhsh01000025_pro_21, rhsh01000029_pro_65	rhsg01000016_pro_17, rhsg01000021_pro_21, rhsg01000023_pro_65	rwhx01000010_pro_88, rwhx01000013_pro_17, rwhx01000080_pro_1	pyya01000005_pro_129, pyya01000009_pro_50, pyya01000049_pro_21	rzmt01000008_pro_128, rzmt01000015_pro_18, rzmt01000047_pro_21	rzmu01000011_pro_80, rzmu01000015_pro_18, rzmu01000047_pro_21	rwhw01000006_pro_17, rwhw01000017_pro_50, rwhw01000093_pro_14	nbta01000005_pro_104, nbta01000012_pro_71, nbta01000023_pro_486	rses01000007_pro_36, rses01000009_pro_16, rses01000086_pro_14	rzmv01000008_pro_51, rzmv01000011_pro_80, rzmv01000070_pro_1	rqxy01000006_pro_36, rqxy01000008_pro_87, rqxy01000083_pro_1	rser01000013_pro_72, rser01000046_pro_16, rser01000053_pro_1	rrcr01000004_pro_72, rrcr01000012_pro_86, rrcr01000056_pro_1	rwhv01000003_pro_69, rwhv01000009_pro_15, rwhv01000087_pro_14	cp011279_pro_4236	cp010518_pro_4221	PAQ31011_02865	PBR20603_00096, PBR20603_04451, PBR20603_04483	NA	NA	NA	NA	NA	NA	NA	PCO31110_01886, PCO31110_03572, PCO31110_05101	PCO31111_01066, PCO31111_01478, PCO31111_05099	kb944426_pro_86, kb944452_pro_37, kb944453_pro_1	NA	NA	NA	NA	PFI31113_00011, PFI31113_01423, PFI31113_04893	PHO31112_01665, PHO31112_04024, PHO31112_05219	PIN31009_01149, PIN31009_05281, PIN31009_05282, PIN31009_05342	PIN31115_01340	PMO31116_02655	NA	NA	NA	PPN31114_03130	NA
OG0000135	NA	PAN31117_00704	NA	cp011501_pro_1376, cp011501_pro_2665	cp013481_pro_2661, cp013481_pro_3675	cp014018_pro_1783, cp014018_pro_3069	PAP18089_03477, PAP18089_04749	rhsh01000001_pro_139, rhsh01000013_pro_57	rhsg01000001_pro_179, rhsg01000008_pro_197	rwhx01000002_pro_144, rwhx01000027_pro_57	pyya01000004_pro_146, pyya01000013_pro_57	rzmt01000006_pro_79, rzmt01000011_pro_55	rzmu01000002_pro_178, rzmu01000013_pro_57	rwhw01000001_pro_84, rwhw01000111_pro_6	nbta01000014_pro_34, nbta01000023_pro_214	rses01000004_pro_74, rses01000034_pro_55	rzmv01000003_pro_82, rzmv01000012_pro_57	rqxy01000014_pro_51	rser01000002_pro_84, rser01000010_pro_56	rrcr01000026_pro_57	rwhv01000004_pro_142, rwhv01000099_pro_3	cp011279_pro_1029, cp011279_pro_4431	cp010518_pro_1029, cp010518_pro_4416	PAQ31011_00435	PBR20603_03799, PBR20603_04481	maos01000028_pro_197, maos01000034_pro_54, maos01000036_pro_35	PCA20602_01081	PCA31118_00717	B6_00192	PCE31106_01684	NA	PCO31010_00445	PCO31110_01296	PCO31111_02765, PCO31111_03014	kb944435_pro_23	NA	cp011807_pro_2277	jtcr01000004_pro_162	jtcs01000003_pro_68	PFI31113_00433	PHO31112_03718	PIN31009_02701	PIN31115_03593	PMO31116_00333	cp013480_pro_2130	PNO31109_00804	cp011253_pro_2497	PPN31114_00517, PPN31114_00857	cp006900_pro_1863
OG0000136	NA	PAN31117_01697, PAN31117_02383	NA	cp011501_pro_2592	cp013481_pro_2586	cp014018_pro_2993	PAP18089_04672	rhsh01000001_pro_214	rhsg01000001_pro_254	rwhx01000002_pro_69	pyya01000004_pro_71	rzmt01000006_pro_4	rzmu01000002_pro_103	rwhw01000001_pro_159	nbta01000023_pro_139	rses01000023_pro_1	rzmv01000003_pro_157	rqxy01000016_pro_85	rser01000002_pro_157	rrcr01000002_pro_103	rwhv01000004_pro_67	cp011279_pro_956	cp010518_pro_956	PAQ31011_00334	NA	maos01000039_pro_144, maos01000049_pro_9, maos01000061_pro_58	PCA20602_00989, PCA20602_04637	PCA31118_00801	B6_00739, B6_01637	PCE31106_00556, PCE31106_03353	PCE31107_04014	PCO31010_00346	PCO31110_01786	NA	kb944446_pro_17	PEP31012_02062	cp011807_pro_2216	jtcr01000004_pro_100	jtcs01000003_pro_6	PFI31113_00503	NA	PIN31009_00857, PIN31009_04950	PIN31115_00009, PIN31115_01028	PMO31116_00157, PMO31116_00279	cp013480_pro_4975, cp013480_pro_749	PNO31109_00847	cp011253_pro_2406	PPN31114_01857, PPN31114_02826	cp006900_pro_1916, cp006900_pro_2019
OG0000137	NA	PAN31117_01934	PAN31108_02650	cp011501_pro_1525, cp011501_pro_2458	cp013481_pro_3486	cp014018_pro_1953, cp014018_pro_2847	PAP18089_04033, PAP18089_04816	rhsh01000001_pro_361, rhsh01000012_pro_56	rhsg01000001_pro_401, rhsg01000014_pro_56	rwhx01000018_pro_54, rwhx01000068_pro_2	pyya01000011_pro_56, pyya01000015_pro_10	rzmt01000010_pro_83, rzmt01000023_pro_16	rzmu01000010_pro_55, rzmu01000035_pro_2	rwhw01000041_pro_34, rwhw01000060_pro_27	nbta01000006_pro_100, nbta01000014_pro_168	rses01000032_pro_54, rses01000040_pro_34	rzmv01000026_pro_2, rzmv01000030_pro_54	rqxy01000007_pro_55, rqxy01000053_pro_30	rser01000019_pro_12, rser01000031_pro_52	rrcr01000011_pro_55, rrcr01000022_pro_58	rwhv01000005_pro_34, rwhv01000023_pro_53, rwhv01000034_pro_55	cp011279_pro_4580, cp011279_pro_822	cp010518_pro_4565, cp010518_pro_822	PAQ31011_00092	PBR20603_00952	maos01000046_pro_33	PCA20602_00811	PCA31118_00993	B6_02726	PCE31106_03092	PCE31107_02192	PCO31010_00088	PCO31110_04451	PCO31111_02150	kb944424_pro_94	PEP31012_04142	cp011807_pro_2064	jtcr01000037_pro_147	jtcs01000026_pro_147	PFI31113_00677	PHO31112_03819	PIN31009_03864	PIN31115_04030	PMO31116_00085	cp013480_pro_2570	PNO31109_00940, PNO31109_00941, PNO31109_03549	cp011253_pro_2214	PPN31114_00967	cp006900_pro_2069
OG0000138	NA	PAN31117_03435	PAN31108_00976, PAN31108_04917	cp011501_pro_3234, cp011501_pro_391	cp013481_pro_3169, cp013481_pro_4659	cp014018_pro_3561, cp014018_pro_790	PAP18089_00409, PAP18089_04291	rhsh01000005_pro_41, rhsh01000015_pro_25	rhsg01000007_pro_41, rhsg01000015_pro_25	rwhx01000012_pro_63, rwhx01000046_pro_17	pyya01000016_pro_63, pyya01000020_pro_19	rzmt01000002_pro_256, rzmt01000013_pro_63	rzmu01000033_pro_16, rzmu01000042_pro_18	rwhw01000038_pro_26, rwhw01000051_pro_18	nbta01000001_pro_66, nbta01000017_pro_25	rses01000017_pro_57, rses01000055_pro_18	rzmv01000019_pro_18, rzmv01000039_pro_16	rqxy01000041_pro_16	rser01000015_pro_57, rser01000018_pro_18	rrcr01000042_pro_16	rwhv01000040_pro_26, rwhv01000051_pro_18	cp011279_pro_1598, cp011279_pro_3457	cp010518_pro_1597, cp010518_pro_3440	PAQ31011_04902	PBR20603_00672	maos01000061_pro_145	PCA20602_04252	PCA31118_01281	B6_04299	PCE31106_00073	PCE31107_00237	PCO31010_01696	PCO31110_00843, PCO31110_02031	PCO31111_00649, PCO31111_04790	kb944426_pro_174, kb944454_pro_856	PEP31012_01552	cp011807_pro_102	jtcr01000020_pro_14	jtcs01000014_pro_14	PFI31113_03505	PHO31112_00463	PIN31009_03367	PIN31115_02994	PMO31116_01492	cp013480_pro_1567	NA	cp011253_pro_89	PPN31114_04083	cp006900_pro_3931
OG0000139	NA	PAN31117_04330	PAN31108_03388	cp011501_pro_2504	cp013481_pro_2492	cp014018_pro_2896	PAP18089_04085	rhsh01000001_pro_311	rhsg01000001_pro_351	rwhx01000037_pro_32, rwhx01000047_pro_8	pyya01000006_pro_123, pyya01000015_pro_59, pyya01000022_pro_32	rzmt01000004_pro_32, rzmt01000026_pro_8	rzmu01000008_pro_32, rzmu01000053_pro_17	rwhw01000010_pro_3, rwhw01000066_pro_16	nbta01000006_pro_50	rses01000006_pro_103, rses01000064_pro_8, rses01000110_pro_1, rses01000115_pro_1	rzmv01000009_pro_103, rzmv01000026_pro_52	rqxy01000003_pro_32, rqxy01000062_pro_17	rser01000006_pro_35, rser01000009_pro_21, rser01000019_pro_62	rrcr01000008_pro_103, rrcr01000022_pro_8	rwhv01000048_pro_17, rwhv01000066_pro_8	cp011279_pro_868	cp010518_pro_868	PAQ31011_00161	PBR20603_00998	maos01000024_pro_15	PCA20602_04401	PCA31118_00272, PCA31118_05220	B6_01606	PCE31106_01494, PCE31106_01507, PCE31106_03330	PCE31107_00413	PCO31010_01014	PCO31110_04492	PCO31111_02186	kb944424_pro_135	PEP31012_02093, PEP31012_02294	cp011807_pro_1303	jtcr01000004_pro_22	jtcs01000034_pro_73	PFI31113_00623	PHO31112_03771	PIN31009_02330	PIN31115_03954	PMO31116_00132, PMO31116_03901	cp013480_pro_2494	PNO31109_00831	NA	PPN31114_00893	cp006900_pro_2033, cp006900_pro_2153
OG0000140	NA	PAN31117_05423	PAN31108_05234	cp011501_pro_4193	NA	NA	PAP18089_03191	NA	NA	rwhx01000037_pro_18	pyya01000022_pro_18	rzmt01000004_pro_18	rzmu01000008_pro_18	NA	NA	rses01000006_pro_117	rzmv01000009_pro_117	rqxy01000003_pro_18	rser01000009_pro_7	rrcr01000008_pro_117	rwhv01000048_pro_31	cp011279_pro_2557	cp010518_pro_2556	NA	PBR20603_03805	NA	NA	NA	NA	PCE31106_02645	PCE31107_02740	NA	NA	NA	NA	PEP31012_01823	cp011807_pro_1631, cp011807_pro_1987, cp011807_pro_2034, cp011807_pro_2889, cp011807_pro_3083, cp011807_pro_3279, cp011808_pro_154, cp011808_pro_168, cp011808_pro_193, cp011808_pro_198, cp011808_pro_200, cp011808_pro_227, cp011808_pro_273, cp011808_pro_287, cp011808_pro_59, cp011809_pro_10, cp011809_pro_69	NA	NA	PFI31113_03960	PHO31112_00560, PHO31112_02624, PHO31112_03289, PHO31112_04725, PHO31112_05025, PHO31112_05293	NA	NA	NA	NA	NA	cp011253_pro_1952, cp011253_pro_2687, cp011253_pro_3091, cp011253_pro_3134, cp011253_pro_427, cp011253_pro_4449, cp011518_pro_189, cp011518_pro_234, cp011518_pro_352, cp011518_pro_60, cp011518_pro_69	NA	NA
OG0000141	NA	PAN31117_00931	PAN31108_00407, PAN31108_03105	cp011501_pro_2947	cp013481_pro_2873	cp014018_pro_3265	PAP18089_02433	rhsh01000026_pro_17	rhsg01000022_pro_17	rwhx01000025_pro_38	pyya01000045_pro_4	rzmt01000044_pro_28	rzmu01000021_pro_28	rwhw01000032_pro_32	nbta01000023_pro_409	rses01000044_pro_14	rzmv01000041_pro_14	rqxy01000048_pro_22	rser01000020_pro_50	rrcr01000020_pro_41	rwhv01000022_pro_14	cp011279_pro_1311	cp010518_pro_1310	PAQ31011_00705	PBR20603_01161	maos01000023_pro_23, maos01000041_pro_5	PCA20602_01322	PCA31118_00486, PCA31118_00506	B6_02427, B6_03561	PCE31106_03902, PCE31106_03974	PCE31107_01825, PCE31107_02653	PCO31010_00711	PCO31110_01514, PCO31110_01856	PCO31111_00805, PCO31111_01036	kb944426_pro_55, kb944428_pro_76	PEP31012_01858, PEP31012_03048, PEP31012_04319	cp011807_pro_2468	jtcr01000035_pro_7	jtcs01000014_pro_312	PFI31113_00231	PHO31112_03504, PHO31112_03994	PIN31009_03029, PIN31009_03484	PIN31115_02612, PIN31115_02880	PMO31116_00255, PMO31116_00557	cp013480_pro_1892	PNO31109_00637	cp011253_pro_2710	PPN31114_00141	cp006900_pro_1712, cp006900_pro_1936
OG0000142	NA	PAN31117_01238	PAN31108_03592, PAN31108_04111	cp011501_pro_4311	cp013481_pro_678	cp014018_pro_55	PAP18089_03322	rhsh01000008_pro_78	rhsg01000009_pro_79	rwhx01000019_pro_74	pyya01000026_pro_74	rzmt01000028_pro_58	rzmu01000022_pro_74	rwhw01000014_pro_74	nbta01000004_pro_169	rses01000071_pro_1	rzmv01000046_pro_2	rqxy01000049_pro_36	rser01000028_pro_1	rrcr01000049_pro_1	rwhv01000019_pro_73	cp011279_pro_2675	cp010518_pro_2674	PAQ31011_02289, PAQ31011_03000	PBR20603_03627	maos01000013_pro_63, maos01000021_pro_92, maos01000026_pro_45, maos01000028_pro_244	PCA20602_00626, PCA20602_02895, PCA20602_03416, PCA20602_03868	PCA31118_01915, PCA31118_02625, PCA31118_03221, PCA31118_03235, PCA31118_04012	B6_04099	PCE31106_03609	PCE31107_01073	PCO31010_04950	PCO31110_02928	PCO31111_03407	kb944423_pro_13	PEP31012_00704	cp011807_pro_1080, cp011807_pro_3803, cp011807_pro_4017	jtcr01000042_pro_3	jtcs01000059_pro_9	PFI31113_02221, PFI31113_02222	PHO31112_05175	PIN31009_04605	PIN31115_04788	PMO31116_01895	cp013480_pro_4622	NA	cp011253_pro_1126, cp011253_pro_4083	PPN31114_03795	cp006900_pro_403
OG0000143	NA	PAN31117_03284	PAN31108_04758	cp011501_pro_1641	cp013481_pro_3365	cp014018_pro_2074	PAP18089_05260	rhsh01000031_pro_2	rhsg01000024_pro_2	rwhx01000034_pro_2	pyya01000033_pro_50	rzmt01000031_pro_49	rzmu01000026_pro_49	rwhw01000113_pro_4	nbta01000014_pro_289	rses01000039_pro_37	rzmv01000035_pro_2	rqxy01000028_pro_49	rser01000034_pro_48	rrcr01000028_pro_49	rwhv01000043_pro_37	cp011279_pro_5	cp010518_pro_5	PAQ31011_02912	PBR20603_04549	maos01000047_pro_48	PCA20602_02790	PCA31118_04961	B6_01112, B6_01878, B6_03043, B6_03838	PCE31106_00984, PCE31106_02000, PCE31106_03439	PCE31107_01335, PCE31107_02587, PCE31107_03127, PCE31107_03621	PCO31010_03907	NA	NA	NA	PEP31012_00405, PEP31012_02702, PEP31012_03289	cp011807_pro_1318	jtcr01000006_pro_45	jtcs01000010_pro_41	PFI31113_04772	NA	PIN31009_01648	PIN31115_01830	PMO31116_02932, PMO31116_04019	cp013480_pro_3566	PNO31109_03559	cp011253_pro_1410	PPN31114_01843	cp006900_pro_3028
OG0000144	NA	PAN31117_04478	PAN31108_01345, PAN31108_03149, PAN31108_03163	cp011501_pro_3416	cp013481_pro_1577	cp014018_pro_1531, cp014018_pro_3841	PAP18089_02973	rhsh01000003_pro_91	rhsg01000006_pro_90	rwhx01000026_pro_36	pyya01000019_pro_64	rzmt01000017_pro_25	rzmu01000028_pro_25	rwhw01000023_pro_30	nbta01000013_pro_199	rses01000025_pro_25	rzmv01000016_pro_25	rqxy01000033_pro_25	rser01000037_pro_25	rrcr01000032_pro_25	rwhv01000030_pro_25	cp011279_pro_1780	cp010518_pro_1779	PAQ31011_00281, PAQ31011_03581	PBR20603_04166	maos01000001_pro_216, maos01000024_pro_32, maos01000036_pro_32, maos01000083_pro_56	PCA20602_02120, PCA20602_04936	PCA31118_05246	B6_01111, B6_02601	PCE31106_00983, PCE31106_01454	PCE31107_01334, PCE31107_02867, PCE31107_03389	PCO31010_04416	PCO31110_03860	PCO31111_03864	kb944444_pro_29	PEP31012_00056, PEP31012_03769	cp011807_pro_3022	jtcr01000010_pro_78	jtcs01000025_pro_86	PFI31113_04538	PHO31112_04081	PIN31009_04229	PIN31115_03200	PMO31116_02076	cp013480_pro_1366	PNO31109_01760	cp011253_pro_3279	PPN31114_00860, PPN31114_04279	cp006900_pro_1176
OG0000145	NA	NA	PAN31108_02963, PAN31108_04732	cp011501_pro_3752	cp013481_pro_1252	cp014018_pro_4170	PAP18089_02166	rhsh01000018_pro_90	rhsg01000017_pro_89	rwhx01000010_pro_72	pyya01000005_pro_113	rzmt01000008_pro_112	rzmu01000011_pro_64	rwhw01000017_pro_34	nbta01000023_pro_502	rses01000009_pro_32	rzmv01000011_pro_64	rqxy01000008_pro_71	rser01000046_pro_31	rrcr01000012_pro_70	rwhv01000009_pro_29	cp011279_pro_2116	cp010518_pro_2115	PAQ31011_03063, PAQ31011_03996	PBR20603_04009	maos01000023_pro_43, maos01000026_pro_46	PCA20602_00047, PCA20602_01302	NA	B6_00531, B6_02189, B6_04041	PCE31106_01217	PCE31107_01588	PCO31010_02694, PCO31010_04070	PCO31110_03545	NA	kb944452_pro_65	PEP31012_00045	cp011807_pro_2122	jtcr01000009_pro_271, jtcr01000013_pro_34	jtcs01000022_pro_18, jtcs01000025_pro_239	PFI31113_03543, PFI31113_03988	PHO31112_01619, PHO31112_02637	PIN31009_01465, PIN31009_03747	PIN31115_01651, PIN31115_04147	PMO31116_00218	cp013480_pro_2743, cp013480_pro_3765	PNO31109_01004	NA	NA	cp006900_pro_1966, cp006900_pro_917
OG0000146	NA	NA	NA	NA	cp013481_pro_461	NA	PAP18089_04171, PAP18089_05340	rhsh01000067_pro_1	rhsg01000055_pro_1	rwhx01000110_pro_1	pyya01000074_pro_1	rzmt01000084_pro_1	rzmu01000087_pro_1	rwhw01000099_pro_9, rwhw01000165_pro_1, rwhw01000168_pro_1, rwhw01000175_pro_1, rwhw01000189_pro_1	NA	rses01000132_pro_1	rzmv01000095_pro_1	rqxy01000115_pro_1	rser01000125_pro_1, rser01000135_pro_1	rrcr01000119_pro_1	rwhv01000118_pro_1	NA	NA	NA	NA	NA	NA	NA	B6_01307	PCE31106_03160, PCE31106_03951	PCE31107_04666, PCE31107_04668	NA	PCO31110_04142	NA	kb944427_pro_39, kb944429_pro_71	PEP31012_01834, PEP31012_04470	NA	NA	NA	NA	PHO31112_00557, PHO31112_00558, PHO31112_02620	NA	NA	PMO31116_03487	NA	NA	cp011253_pro_1393, cp011253_pro_2127, cp011253_pro_2305, cp011253_pro_2971, cp011253_pro_2988, cp011253_pro_3094, cp011253_pro_3191, cp011253_pro_4184, cp011253_pro_4295, cp011253_pro_4457, cp011253_pro_4621, cp011253_pro_490, cp011253_pro_931, cp011253_pro_962, cp011518_pro_204, cp011518_pro_229, cp011518_pro_347, cp011518_pro_369, cp011518_pro_89, cp011519_pro_4, cp011520_pro_31	NA	cp006900_pro_497
OG0000147	NA	PAN31117_00965	PAN31108_00444	cp011501_pro_2976	cp013481_pro_2903	cp014018_pro_3295	PAP18089_02463	rhsh01000026_pro_47	rhsg01000022_pro_47	rwhx01000025_pro_8	pyya01000012_pro_106	rzmt01000027_pro_33	rzmu01000021_pro_58	rwhw01000032_pro_2	nbta01000023_pro_438	rses01000067_pro_20	rzmv01000067_pro_5	rqxy01000073_pro_9	NA	rrcr01000020_pro_11	rwhv01000022_pro_44	cp011279_pro_1340	cp010518_pro_1339	PAQ31011_00738	PBR20603_01195	maos01000053_pro_28	PCA20602_01355	PCA31118_00452	B6_01653, B6_03885, B6_04074	PCE31106_03369, PCE31106_04004	PCE31107_01794, PCE31107_04030	PCO31010_00744	PCO31110_00109, PCO31110_01548	PCO31111_00836, PCO31111_04260	kb944428_pro_43, kb944454_pro_103	PEP31012_01887	cp011807_pro_2501	jtcr01000035_pro_34	jtcs01000014_pro_285	PFI31113_00199	PHO31112_04598	PIN31009_03064	PIN31115_02647	PMO31116_00241, PMO31116_00590	cp013480_pro_1856	PNO31109_04281	cp011253_pro_2743	PPN31114_00110	cp006900_pro_1684
OG0000148	NA	PAN31117_05308	PAN31108_03151, PAN31108_03231, PAN31108_03843	cp011501_pro_4642	cp013481_pro_275	cp014018_pro_1533, cp014018_pro_390	PAP18089_03702	rhsh01000027_pro_15	rhsg01000011_pro_15	rwhx01000050_pro_13	pyya01000042_pro_21	rzmt01000041_pro_13	rzmu01000048_pro_13	rwhw01000061_pro_13	nbta01000009_pro_166	rses01000057_pro_13	rzmv01000048_pro_13	rqxy01000052_pro_13	rser01000054_pro_13	rrcr01000052_pro_13	rwhv01000055_pro_13	cp011279_pro_3005	cp010518_pro_3007	PAQ31011_04952	PBR20603_03975	maos01000055_pro_13	PCA20602_03770	PCA31118_04162	B6_00417, B6_03020, B6_04506	PCE31106_02176, PCE31106_02908	PCE31107_03490	PCO31010_05289	PCO31110_04339	PCO31111_02733, PCO31111_04152	kb944455_pro_13	PEP31012_00054, PEP31012_03159	cp011807_pro_4154	jtcr01000045_pro_53	jtcs01000039_pro_13	PFI31113_01465, PFI31113_04346	PHO31112_03101	PIN31009_01738, PIN31009_05505	PIN31115_01926, PIN31115_05481	PMO31116_03785	cp013480_pro_3480, cp013480_pro_4955	PNO31109_04236	cp011253_pro_4431	PPN31114_01761, PPN31114_05233	cp006900_pro_15
OG0000149	NA	PAN31117_00150	PAN31108_00748	cp011501_pro_595	cp013481_pro_4452	cp014018_pro_1002	PAP18089_00620	rhsh01000002_pro_8	rhsg01000003_pro_8	rwhx01000004_pro_23	pyya01000002_pro_192	rzmt01000003_pro_120	rzmu01000003_pro_120	rwhw01000003_pro_43	nbta01000008_pro_190	rses01000003_pro_53	rzmv01000001_pro_190	rqxy01000002_pro_53	rser01000001_pro_120	rrcr01000001_pro_120	rwhv01000001_pro_31	cp011279_pro_3663	cp010518_pro_3646	PAQ31011_01541	PBR20603_00461	maos01000043_pro_67	PCA20602_01807	PCA31118_01527	B6_00450, B6_01419	PCE31106_00348	PCE31107_00461	PCO31010_01947, PCO31010_03757	PCO31110_00639	PCO31111_00459	kb944454_pro_641	PEP31012_01356, PEP31012_04336	cp011807_pro_330	jtcr01000004_pro_87, jtcr01000018_pro_172	jtcs01000016_pro_172, jtcs01000034_pro_8	PFI31113_00517, PFI31113_01812	PHO31112_00245	PIN31009_00497, PIN31009_01629	PIN31115_00675, PIN31115_01811	PMO31116_01252, PMO31116_04533	cp013480_pro_3586, cp013480_pro_382	PNO31109_00462	cp011253_pro_1278, cp011253_pro_345	PPN31114_02499, PPN31114_04986	cp006900_pro_3714
OG0000150	NA	PAN31117_00499, PAN31117_00608	PAN31108_03417	cp011501_pro_898	cp013481_pro_4141	cp014018_pro_1311	PAP18089_00937, PAP18089_01867	rhsh01000002_pro_317	rhsg01000003_pro_318	rwhx01000009_pro_91	pyya01000024_pro_22	rzmt01000005_pro_21	rzmu01000005_pro_21	rwhw01000008_pro_62	nbta01000021_pro_24	rses01000014_pro_68	rzmv01000005_pro_147	rqxy01000005_pro_91	rser01000011_pro_22	rrcr01000010_pro_21	rwhv01000008_pro_21	cp011279_pro_3966	cp010518_pro_3949	PAQ31011_01896	PBR20603_00144	maos01000001_pro_195	PCA20602_03036, PCA20602_04470	PCA31118_01916, PCA31118_01948	B6_03906	PCE31106_03789	PCE31107_02700	PCO31010_03654	PCO31110_00305, PCO31110_02349	PCO31111_00147, PCO31111_01763	kb944423_pro_550, kb944454_pro_305	PEP31012_02859	cp011807_pro_657	jtcr01000011_pro_61, jtcr01000031_pro_64	jtcs01000008_pro_61, jtcs01000038_pro_27	PFI31113_01486, PFI31113_01578	PHO31112_00886, PHO31112_02199	PIN31009_00888, PIN31009_01852	PIN31115_01081, PIN31115_02040	PMO31116_00963	cp013480_pro_3368, cp013480_pro_4354	PNO31109_00154	cp011253_pro_703	PPN31114_01634, PPN31114_03460	cp006900_pro_3434
OG0000151	NA	PAN31117_01018, PAN31117_04632	PAN31108_02991, PAN31108_03486	cp011501_pro_3743	cp013481_pro_1261	cp014018_pro_4161	PAP18089_02175	rhsh01000018_pro_99	rhsg01000017_pro_98	rwhx01000010_pro_81	pyya01000005_pro_122	rzmt01000008_pro_121	rzmu01000011_pro_73	rwhw01000017_pro_43	nbta01000023_pro_493	rses01000009_pro_23	rzmv01000011_pro_73	rqxy01000008_pro_80	rser01000046_pro_23	rrcr01000012_pro_79	rwhv01000009_pro_21	cp011279_pro_2107	cp010518_pro_2106	PAQ31011_00889	PBR20603_00769, PBR20603_04527	maos01000026_pro_90, maos01000056_pro_23	PCA20602_00084, PCA20602_04728	PCA31118_04042	B6_00649	PCE31106_00939	PCE31107_01291	PCO31010_00869	PCO31110_00945, PCO31110_03554	PCO31111_00745, PCO31111_01489	kb944452_pro_55, kb944454_pro_956	NA	NA	NA	NA	NA	PHO31112_01628, PHO31112_04975	PIN31009_00118, PIN31009_04188	PIN31115_00325, PIN31115_04636	PMO31116_02516	cp013480_pro_31, cp013480_pro_4101	PNO31109_01153, PNO31109_02981	NA	PPN31114_02139, PPN31114_03193	cp006900_pro_2596
OG0000152	NA	PAN31117_01351	PAN31108_04005	cp011501_pro_4210	cp013481_pro_784	cp014018_pro_4568	PAP18089_03208	rhsh01000006_pro_198	rhsg01000004_pro_386	rwhx01000037_pro_1	pyya01000022_pro_1	rzmt01000004_pro_1	rzmu01000008_pro_1	rwhw01000124_pro_6	nbta01000004_pro_278	rses01000006_pro_134	rzmv01000009_pro_134	rqxy01000003_pro_1	rser01000074_pro_11	rrcr01000008_pro_134	rwhv01000048_pro_48	cp011279_pro_2574	cp010518_pro_2573	PAQ31011_00200, PAQ31011_01786, PAQ31011_02402	PBR20603_03391	maos01000036_pro_7, maos01000039_pro_37, maos01000076_pro_6	PCA20602_00512	PCA31118_00535, PCA31118_02515	B6_04021	PCE31106_00711, PCE31106_04436	PCE31107_00822	PCO31010_02595	NA	NA	NA	PEP31012_03966	cp011807_pro_3698	jtcr01000019_pro_18	jtcs01000047_pro_1	PFI31113_02108	PHO31112_00727, PHO31112_03809, PHO31112_05235	PIN31009_02958, PIN31009_04723	PIN31115_02555, PIN31115_04897	PMO31116_01774	cp013480_pro_1933, cp013480_pro_4523	PNO31109_01197	cp011253_pro_3982	PPN31114_02952, PPN31114_03685	cp006900_pro_492
OG0000153	NA	PAN31117_04159, PAN31117_04461	PAN31108_01364, PAN31108_03203, PAN31108_04999	cp011501_pro_3401	cp013481_pro_1592	cp014018_pro_3828	PAP18089_02989	rhsh01000003_pro_76	rhsg01000006_pro_75	rwhx01000026_pro_21	pyya01000019_pro_49	rzmt01000017_pro_40	rzmu01000028_pro_40	rwhw01000023_pro_15	nbta01000013_pro_214	rses01000025_pro_40	rzmv01000016_pro_40	rqxy01000033_pro_40	NA	rrcr01000032_pro_40	rwhv01000030_pro_40	cp011279_pro_1765	cp010518_pro_1764	PAQ31011_02165, PAQ31011_03566	PBR20603_04181	maos01000025_pro_42, maos01000083_pro_70	PCA20602_02105, PCA20602_04885	PCA31118_04656, PCA31118_04929	B6_00481, B6_02585	PCE31106_01438, PCE31106_03190	PCE31107_00148, PCE31107_03405	PCO31010_04854, PCO31010_05165	PCO31110_03889	PCO31111_03846	kb944444_pro_57	PEP31012_03783, PEP31012_04359	cp011807_pro_3005	jtcr01000010_pro_62	jtcs01000025_pro_102	PFI31113_04521	PHO31112_04099	PIN31009_03186	PIN31115_03183	PMO31116_02061	cp013480_pro_1382	PNO31109_01743	cp011253_pro_3265	PPN31114_04263	cp006900_pro_1189
OG0000154	muhy01000003_pro_6	PAN31117_00101	PAN31108_00797	cp011501_pro_547	cp013481_pro_4501	cp014018_pro_952	PAP18089_00570	rhsh01000005_pro_202	rhsg01000007_pro_203	rwhx01000004_pro_71	pyya01000002_pro_143	rzmt01000003_pro_168	rzmu01000003_pro_168	rwhw01000003_pro_91	nbta01000008_pro_141	rses01000003_pro_5	rzmv01000001_pro_142	rqxy01000002_pro_5	rser01000001_pro_168	rrcr01000001_pro_168	rwhv01000001_pro_79	cp011279_pro_3614	cp010518_pro_3597	PAQ31011_01473	PBR20603_00509	maos01000030_pro_66	PCA20602_01756	PCA31118_01480	B6_03938, B6_04347	PCE31106_00290, PCE31106_03020	PCE31107_00406, PCE31107_02685	PCO31010_01895	PCO31110_00680	PCO31111_00503, PCO31111_02682	kb944454_pro_697	PEP31012_01396, PEP31012_02887	cp011807_pro_292	jtcr01000018_pro_135	jtcs01000016_pro_135	PFI31113_02754	PHO31112_00299	PIN31009_00428	PIN31115_00605	PMO31116_01302, PMO31116_03993	cp013480_pro_314	PNO31109_00505	cp011253_pro_285	PPN31114_02437	cp006900_pro_182, cp006900_pro_3759
OG0000155	NA	PAN31117_00404	PAN31108_04288	cp011501_pro_956	cp013481_pro_4080	cp014018_pro_1371	PAP18089_00998	rhsh01000002_pro_377	rhsg01000003_pro_378	rwhx01000009_pro_31	pyya01000039_pro_11	rzmt01000005_pro_81	rzmu01000005_pro_81	rwhw01000008_pro_2	nbta01000021_pro_84	rses01000014_pro_8	rzmv01000005_pro_89	rqxy01000005_pro_31	rser01000011_pro_80	rrcr01000010_pro_81	rwhv01000008_pro_80	cp011279_pro_4024	cp010518_pro_4007	PAQ31011_01804	PBR20603_00088, PBR20603_00228	maos01000001_pro_293	PCA20602_05001	PCA31118_01835	B6_00720	PCE31106_00575, PCE31106_02556	PCE31107_00688	PCO31010_03569	PCO31110_00235	PCO31111_00081	kb944454_pro_234	PEP31012_01135	cp011807_pro_574	jtcr01000023_pro_12, jtcr01000031_pro_72	jtcs01000008_pro_120, jtcs01000038_pro_19	PFI31113_01414, PFI31113_01569	PHO31112_02118, PHO31112_02311	PIN31009_00767, PIN31009_00975	PIN31115_00942, PIN31115_01168	PMO31116_01029, PMO31116_02846	cp013480_pro_666	PNO31109_00226	cp011253_pro_603	PPN31114_02758	cp006900_pro_1468, cp006900_pro_3498
OG0000156	NA	PAN31117_01699, PAN31117_04545	PAN31108_03083	cp011501_pro_2590	cp013481_pro_2584	cp014018_pro_2991	PAP18089_04670	rhsh01000001_pro_216	rhsg01000001_pro_256	rwhx01000002_pro_67	pyya01000004_pro_69	rzmt01000006_pro_2	rzmu01000002_pro_101	rwhw01000001_pro_161	nbta01000023_pro_137	rses01000023_pro_3	rzmv01000003_pro_159	rqxy01000016_pro_87	rser01000002_pro_159	rrcr01000002_pro_101	rwhv01000004_pro_65	cp011279_pro_954	cp010518_pro_954	PAQ31011_00332, PAQ31011_02754	NA	maos01000027_pro_13, maos01000039_pro_142, maos01000049_pro_7	PCA20602_00179, PCA20602_00987, PCA20602_04044	PCA31118_00803, PCA31118_04129	B6_00735	PCE31106_00560	NA	PCO31010_00344, PCO31010_02258	PCO31110_01790	NA	kb944446_pro_21	PEP31012_01142	cp011807_pro_2214	jtcr01000004_pro_98	jtcs01000003_pro_4	PFI31113_00505	NA	PIN31009_00855, PIN31009_01787, PIN31009_04952	PIN31115_00007, PIN31115_01026, PIN31115_01975	PMO31116_00277	cp013480_pro_3433, cp013480_pro_4973, cp013480_pro_747	PNO31109_00849	cp011253_pro_2404, cp011253_pro_3672	PPN31114_01721, PPN31114_01855, PPN31114_02824	cp006900_pro_1918
OG0000157	NA	PAN31117_01778, PAN31117_01857	PAN31108_02732	cp011501_pro_2551	cp013481_pro_2538	cp014018_pro_2945	PAP18089_04623	rhsh01000001_pro_262	rhsg01000001_pro_302	rwhx01000002_pro_25, rwhx01000062_pro_4	pyya01000004_pro_27, pyya01000050_pro_4	rzmt01000025_pro_42, rzmt01000055_pro_4	rzmu01000002_pro_4, rzmu01000002_pro_59	rwhw01000001_pro_203, rwhw01000049_pro_4	nbta01000023_pro_91	rses01000023_pro_45, rses01000099_pro_4	rzmv01000003_pro_201, rzmv01000053_pro_4	rqxy01000013_pro_4, rqxy01000013_pro_59	rser01000002_pro_198, rser01000002_pro_252	rrcr01000002_pro_4, rrcr01000002_pro_59	rwhv01000004_pro_23, rwhv01000063_pro_4	cp011279_pro_915	cp010518_pro_915	NA	NA	NA	PCA20602_04919	PCA31118_00099	B6_02836	PCE31106_04345, PCE31106_04477	PCE31107_02087, PCE31107_02150	PCO31010_00232	PCO31110_04534, PCO31110_04566	PCO31111_02272	kb944443_pro_44, kb944443_pro_72	PEP31012_03929	cp011807_pro_2830	NA	NA	PFI31113_00590	PHO31112_03194, PHO31112_03233	NA	NA	PMO31116_00203	NA	PNO31109_01974	cp011518_pro_359	NA	cp006900_pro_1979
OG0000158	NA	PAN31117_01801, PAN31117_04483	PAN31108_01340	cp011501_pro_3421	cp013481_pro_1572	cp014018_pro_3846	PAP18089_02968	rhsh01000003_pro_96	rhsg01000006_pro_95	rwhx01000026_pro_41	pyya01000019_pro_69	rzmt01000017_pro_20	rzmu01000028_pro_20	rwhw01000023_pro_35	nbta01000013_pro_194	rses01000025_pro_20	rzmv01000016_pro_20	rqxy01000033_pro_20	rser01000037_pro_20	rrcr01000032_pro_20	rwhv01000030_pro_20	cp011279_pro_1785	cp010518_pro_1784	PAQ31011_00189, PAQ31011_03587	PBR20603_04161	maos01000083_pro_48	PCA20602_02128	PCA31118_05252	B6_00731, B6_02606	PCE31106_00564, PCE31106_01459	PCE31107_00677, PCE31107_03384	PCO31010_04409	PCO31110_03855	PCO31111_03869	kb944444_pro_24	PEP31012_03764	cp011807_pro_3029	jtcr01000010_pro_83, jtcr01000028_pro_48	jtcs01000023_pro_48, jtcs01000025_pro_81	PFI31113_04543	PHO31112_04076	PIN31009_04236	PIN31115_03207	PMO31116_02082, PMO31116_03807	cp013480_pro_1360	PNO31109_01765	cp011253_pro_3287	PPN31114_04285	cp006900_pro_1171, cp006900_pro_2918
OG0000159	NA	PAN31117_03192, PAN31117_03368, PAN31117_04304	PAN31108_01042, PAN31108_03119, PAN31108_03349	cp011501_pro_2928, cp011501_pro_337	cp013481_pro_4717	cp014018_pro_733	PAP18089_00350	rhsh01000036_pro_23	rhsg01000005_pro_327	rwhx01000035_pro_41	pyya01000020_pro_77	rzmt01000002_pro_199	rzmu01000030_pro_7	rwhw01000004_pro_96	nbta01000001_pro_7	rses01000036_pro_41	rzmv01000019_pro_76	rqxy01000042_pro_35	rser01000018_pro_75	rrcr01000043_pro_7	rwhv01000036_pro_7	cp011279_pro_1292, cp011279_pro_3403	cp010518_pro_1291, cp010518_pro_3386	PAQ31011_01044, PAQ31011_01235, PAQ31011_03012	PBR20603_00735	maos01000002_pro_19, maos01000028_pro_224	PCA20602_01487, PCA20602_02906	PCA31118_00230, PCA31118_01213	B6_03835	PCE31106_02003	PCE31107_03130	PCO31010_01047, PCO31010_01623, PCO31010_02652	NA	NA	NA	PEP31012_02699	cp011807_pro_37	jtcr01000027_pro_95	jtcs01000018_pro_95	PFI31113_00810, PFI31113_02980	NA	PIN31009_00155, PIN31009_01761	PIN31115_00362, PIN31115_01949	NA	cp013480_pro_4508, cp013480_pro_69	NA	cp011253_pro_1496, cp011253_pro_2956	PPN31114_00165, PPN31114_01747, PPN31114_02175	NA
OG0000160	NA	PAN31117_03305	NA	cp011501_pro_1515	cp013481_pro_3496	cp014018_pro_1943	PAP18089_04827	rhsh01000012_pro_66	rhsg01000014_pro_66	rwhx01000018_pro_44	pyya01000011_pro_66	rzmt01000023_pro_26	rzmu01000010_pro_65	rwhw01000022_pro_44, rwhw01000120_pro_3	nbta01000014_pro_158	rses01000027_pro_44	rzmv01000033_pro_8	rqxy01000007_pro_65	rser01000036_pro_7	rrcr01000011_pro_65	rwhv01000023_pro_43	cp011279_pro_4570	cp010518_pro_4555	PAQ31011_05087	NA	NA	NA	PCA31118_03398, PCA31118_04290	B6_03017, B6_03898	PCE31106_03777	PCE31107_02711	NA	PCO31110_00337, PCO31110_02755	PCO31111_00174, PCO31111_02736	kb944454_pro_338	PEP31012_02834	cp011807_pro_4015	jtcr01000013_pro_45, jtcr01000028_pro_45	jtcs01000023_pro_45, jtcs01000025_pro_228	PFI31113_03576	PHO31112_02223, PHO31112_02318	PIN31009_01147	PIN31115_01338	PMO31116_00741	cp013480_pro_1034	PNO31109_02976, PNO31109_02978	cp011253_pro_657	PPN31114_00875, PPN31114_03128, PPN31114_04331	cp006900_pro_307
OG0000161	NA	NA	NA	cp011501_pro_1519	cp013481_pro_3492	cp014018_pro_1947	PAP18089_04823	rhsh01000012_pro_62	rhsg01000014_pro_62	rwhx01000018_pro_48	pyya01000011_pro_62	rzmt01000023_pro_22	rzmu01000010_pro_61	rwhw01000022_pro_48	nbta01000014_pro_162	rses01000027_pro_48	rzmv01000033_pro_4	rqxy01000007_pro_61	rser01000036_pro_4	rrcr01000011_pro_61	rwhv01000023_pro_47	cp011279_pro_4574	cp010518_pro_4559	PAQ31011_05089	PBR20603_04471, PBR20603_04542	NA	NA	PCA31118_04294, PCA31118_05138	B6_00514, B6_00728, B6_03013, B6_03021, B6_03902	PCE31106_00567, PCE31106_03559, PCE31106_03781	PCE31107_00680, PCE31107_02707, PCE31107_04427	NA	PCO31110_00333, PCO31110_04123	PCO31111_00170, PCO31111_02703, PCO31111_02732, PCO31111_02740	kb944434_pro_122, kb944454_pro_334, kb944454_pro_689	PEP31012_02238, PEP31012_02838	cp011807_pro_4011	jtcr01000002_pro_23	jtcs01000013_pro_23	NA	PHO31112_00291, PHO31112_02227, PHO31112_02316	NA	NA	PMO31116_00737, PMO31116_03810	NA	NA	NA	PPN31114_00871	cp006900_pro_991
OG0000162	NA	PAN31117_00405	PAN31108_04287	cp011501_pro_955	cp013481_pro_4081	cp014018_pro_1370	PAP18089_00997	rhsh01000002_pro_376	rhsg01000003_pro_377	rwhx01000009_pro_32	pyya01000039_pro_10	rzmt01000005_pro_80	rzmu01000005_pro_80	rwhw01000008_pro_3	nbta01000021_pro_83	rses01000014_pro_9	rzmv01000005_pro_90	rqxy01000005_pro_32	NA	rrcr01000010_pro_80	rwhv01000008_pro_79	cp011279_pro_4023	cp010518_pro_4006	PAQ31011_01805	PBR20603_00089, PBR20603_00227	maos01000001_pro_292	PCA20602_05000	PCA31118_01836	B6_00719	PCE31106_00576, PCE31106_02557	PCE31107_00689	PCO31010_03570	PCO31110_00236	PCO31111_00082	kb944454_pro_235	PEP31012_01134	cp011807_pro_575	jtcr01000023_pro_13, jtcr01000031_pro_73	jtcs01000008_pro_119, jtcs01000038_pro_18	PFI31113_01415, PFI31113_01568	PHO31112_02119, PHO31112_02310	PIN31009_00768, PIN31009_00974	PIN31115_00943, PIN31115_01167	PMO31116_01028, PMO31116_02845	cp013480_pro_667	PNO31109_00225	cp011253_pro_604	PPN31114_02759	cp006900_pro_1467, cp006900_pro_3497
OG0000163	NA	PAN31117_00593, PAN31117_03787	PAN31108_04165, PAN31108_05126	cp011501_pro_2215	cp013481_pro_2241	cp014018_pro_2596	PAP18089_04397	rhsh01000004_pro_366	rhsg01000002_pro_477	rwhx01000071_pro_2	pyya01000001_pro_527	rzmt01000001_pro_285	rzmu01000001_pro_458	rwhw01000040_pro_2	nbta01000022_pro_2	rses01000030_pro_67	rzmv01000002_pro_287	rqxy01000064_pro_26	rser01000003_pro_195	rrcr01000061_pro_26	rwhv01000079_pro_18	cp011279_pro_578	cp010518_pro_578	PAQ31011_03954, PAQ31011_04378	PBR20603_01139, PBR20603_04806	maos01000050_pro_91, maos01000064_pro_2	PCA20602_03366, PCA20602_05058	PCA31118_01931, PCA31118_03778	NA	NA	NA	PCO31010_04032, PCO31010_05341	PCO31110_02740	PCO31111_04442	kb944423_pro_165	NA	cp011807_pro_1826	jtcr01000021_pro_65	jtcs01000017_pro_75	PFI31113_03853	PHO31112_01265	PIN31009_03584	PIN31115_05071	PMO31116_02601	cp013480_pro_2905	PNO31109_02657	cp011253_pro_1949	PPN31114_01231	cp006900_pro_2147, cp006900_pro_2292, cp006900_pro_2515
OG0000164	NA	PAN31117_02441, PAN31117_03738	PAN31108_01105	cp011501_pro_3672	cp013481_pro_1335	cp014018_pro_4089	PAP18089_02671	rhsh01000003_pro_335	rhsg01000006_pro_334	rwhx01000054_pro_27	pyya01000030_pro_52	rzmt01000034_pro_47	rzmu01000046_pro_27	rwhw01000030_pro_11	nbta01000003_pro_52	rses01000066_pro_11	rzmv01000024_pro_73	rqxy01000036_pro_51	rser01000049_pro_11	rrcr01000040_pro_45	rwhv01000057_pro_11	cp011279_pro_2036	cp010518_pro_2035	PAQ31011_03846, PAQ31011_03979	PBR20603_02644	maos01000050_pro_152, maos01000057_pro_17	PCA20602_02365, PCA20602_03406	PCA31118_05159	B6_03530	PCE31106_04752, PCE31106_04766	PCE31107_04190	PCO31010_04055, PCO31010_04145	PCO31110_03628	PCO31111_03201	kb944431_pro_21	PEP31012_04006	cp011807_pro_1243, cp011807_pro_3256	jtcr01000009_pro_48, jtcr01000024_pro_119	jtcs01000037_pro_113, jtcs01000044_pro_19	PFI31113_01925, PFI31113_04225	PHO31112_04429	PIN31009_01498, PIN31009_04487	PIN31115_01680, PIN31115_03450	PMO31116_02303	cp013480_pro_1072, cp013480_pro_3732	PNO31109_04265	cp011253_pro_1312, cp011253_pro_3519	PPN31114_04532, PPN31114_04877	cp006900_pro_974
OG0000165	NA	PAN31117_02870	PAN31108_02402	cp011501_pro_1365	cp013481_pro_3686	cp014018_pro_1771	PAP18089_03489	rhsh01000013_pro_44	rhsg01000008_pro_185	rwhx01000040_pro_7	pyya01000013_pro_68	rzmt01000011_pro_44	rzmu01000013_pro_68	rwhw01000039_pro_7	nbta01000014_pro_23	rses01000034_pro_44	rzmv01000012_pro_68	rqxy01000014_pro_62	rser01000010_pro_67	rrcr01000051_pro_33	rwhv01000042_pro_44	cp011279_pro_4420	cp010518_pro_4405	PAQ31011_04024, PAQ31011_04275	PBR20603_02114	maos01000013_pro_60	PCA20602_03871	PCA31118_03218	B6_03826	PCE31106_02012	PCE31107_01764, PCE31107_03138	PCO31010_03305, PCO31010_04088	NA	PCO31111_02707	NA	PEP31012_02273, PEP31012_02691	cp011807_pro_1077, cp011807_pro_1410	jtcr01000005_pro_103, jtcr01000017_pro_20	jtcs01000019_pro_103, jtcs01000021_pro_20	PFI31113_02449, PFI31113_03220	NA	PIN31009_01325, PIN31009_05105	PIN31115_01511, PIN31115_05368	PMO31116_02943	cp013480_pro_3899, cp013480_pro_4829	NA	cp011253_pro_1123, cp011253_pro_667	PPN31114_04712, PPN31114_05120	cp006900_pro_3039
OG0000166	NA	PAN31117_03073	PAN31108_03672	cp011501_pro_1761	cp013481_pro_1819	cp014018_pro_2203	PAP18089_01105	rhsh01000032_pro_16	rhsg01000002_pro_79	rwhx01000005_pro_61	pyya01000001_pro_131	rzmt01000020_pro_61	rzmu01000001_pro_61	rwhw01000005_pro_44	nbta01000022_pro_553	rses01000021_pro_54	rzmv01000022_pro_61	rqxy01000023_pro_54	rser01000026_pro_57	rrcr01000018_pro_54	rwhv01000018_pro_26	cp011279_pro_125	cp010518_pro_125	PAQ31011_03082	PBR20603_01627	maos01000028_pro_167	PCA20602_02957, PCA20602_04906	PCA31118_04791	B6_02847, B6_03033	PCE31106_02297, PCE31106_04466	PCE31107_02098, PCE31107_03611	PCO31010_02713	PCO31110_02296, PCO31110_04547	PCO31111_01278, PCO31111_02255, PCO31111_03983	kb944443_pro_61	PEP31012_03940	cp011807_pro_1444	jtcr01000014_pro_97	jtcs01000030_pro_89	PFI31113_00923	PHO31112_00833, PHO31112_03213	PIN31009_01826	PIN31115_02014	PMO31116_00188, PMO31116_02397	cp013480_pro_3392	PNO31109_01404	cp011253_pro_1549	PPN31114_01659	cp006900_pro_1991, cp006900_pro_2701
OG0000167	NA	PAN31117_03297	PAN31108_01930, PAN31108_02807	NA	NA	NA	PAP18089_02866, PAP18089_02886, PAP18089_04584, PAP18089_04589	rhsh01000016_pro_102	rhsg01000004_pro_4	rwhx01000038_pro_26, rwhx01000038_pro_31	NA	rzmt01000037_pro_17, rzmt01000037_pro_22	rzmu01000007_pro_116, rzmu01000007_pro_121, rzmu01000007_pro_17, rzmu01000007_pro_22	NA	nbta01000023_pro_52, nbta01000023_pro_57	rses01000038_pro_26, rses01000038_pro_31	rzmv01000028_pro_17, rzmv01000028_pro_22	rqxy01000040_pro_17, rqxy01000040_pro_22	rser01000039_pro_26, rser01000039_pro_31	rrcr01000041_pro_17, rrcr01000041_pro_22	rwhv01000056_pro_14, rwhv01000056_pro_9	NA	NA	PAQ31011_03828, PAQ31011_04428	NA	maos01000039_pro_58, maos01000069_pro_20, maos01000094_pro_30	PCA20602_00358	PCA31118_05191	B6_02891, B6_02897	PCE31106_03920, PCE31106_04361, PCE31106_04366	NA	PCO31010_03920, PCO31010_03921	NA	NA	NA	PEP31012_04499, PEP31012_04504	NA	jtcr01000004_pro_63	jtcs01000034_pro_32	PFI31113_00550	NA	PIN31009_01755, PIN31009_02320, PIN31009_02468	PIN31115_01943, PIN31115_03832, PIN31115_03964	NA	cp013480_pro_2354, cp013480_pro_2504, cp013480_pro_3463	NA	cp011253_pro_1997	PPN31114_00712, PPN31114_00902, PPN31114_01753	NA
OG0000168	NA	PAN31117_04061	PAN31108_04589	cp011501_pro_1110	cp013481_pro_3944	cp014018_pro_1507	PAP18089_04975	rhsh01000020_pro_59	rhsg01000018_pro_59	rwhx01000045_pro_45	pyya01000031_pro_25	rzmt01000032_pro_45	rzmu01000041_pro_45	rwhw01000050_pro_45, rwhw01000115_pro_2	nbta01000005_pro_47, nbta01000010_pro_152	rses01000049_pro_45	rzmv01000054_pro_9	rqxy01000037_pro_17	NA	rrcr01000037_pro_17	rwhv01000069_pro_9	cp011279_pro_4178	cp010518_pro_4162	PAQ31011_02116	PBR20603_04620	maos01000025_pro_69	PCA20602_03261	PCA31118_04893	B6_01248	PCE31106_00856	PCE31107_00950	PCO31010_05199	PCO31110_00031, PCO31110_00090	PCO31111_04241, PCO31111_04978	kb944454_pro_37, kb944454_pro_84	PEP31012_00901	cp011807_pro_851	jtcr01000002_pro_25, jtcr01000038_pro_32	jtcs01000013_pro_25, jtcs01000032_pro_40	PFI31113_03428	PHO31112_04617	PIN31009_01109	PIN31115_01302	PMO31116_00773	cp013480_pro_996	PNO31109_03891	cp011253_pro_905	PPN31114_03086	cp006900_pro_3253, cp006900_pro_326
OG0000169	NA	PAN31117_04442	PAN31108_01382, PAN31108_04980	cp011501_pro_1730	cp013481_pro_3271	cp014018_pro_2167	PAP18089_05209	rhsh01000028_pro_23	rhsg01000002_pro_42	rwhx01000005_pro_25	pyya01000001_pro_95	rzmt01000020_pro_25	rzmu01000001_pro_25	rwhw01000005_pro_8	nbta01000015_pro_42	rses01000021_pro_18	rzmv01000022_pro_25	rqxy01000023_pro_18	rser01000026_pro_18	rrcr01000018_pro_18	rwhv01000018_pro_63	cp011279_pro_94	cp010518_pro_94	PAQ31011_03549	PBR20603_01572, PBR20603_04199	maos01000083_pro_86	PCA20602_02089	PCA31118_04638	B6_02568	PCE31106_01419, PCE31106_03546	PCE31107_03422	PCO31010_04871	PCO31110_02260	PCO31111_03929	kb944439_pro_101	PEP31012_02224, PEP31012_03800	cp011807_pro_2988	jtcr01000010_pro_45, jtcr01000014_pro_169	jtcs01000025_pro_119, jtcs01000030_pro_17	PFI31113_00834, PFI31113_04504	PHO31112_04811	PIN31009_03203	PIN31115_03166	PMO31116_02043, PMO31116_02358	cp013480_pro_1400	PNO31109_01727	cp011253_pro_3250	PPN31114_04248	cp006900_pro_1206, cp006900_pro_2734
OG0000170	NA	PAN31117_04485	PAN31108_01338, PAN31108_02968, PAN31108_04728	cp011501_pro_3423	cp013481_pro_1570	cp014018_pro_3848	PAP18089_02966	rhsh01000003_pro_98	rhsg01000006_pro_97	rwhx01000026_pro_43	pyya01000019_pro_71	rzmt01000017_pro_18	rzmu01000028_pro_18	rwhw01000023_pro_37	nbta01000013_pro_192	rses01000025_pro_18	rzmv01000016_pro_18	rqxy01000033_pro_18	rser01000037_pro_18	rrcr01000032_pro_18	rwhv01000030_pro_18	cp011279_pro_1787	cp010518_pro_1786	PAQ31011_03068, PAQ31011_03589	PBR20603_04159	maos01000026_pro_51, maos01000083_pro_46	PCA20602_00052, PCA20602_02130	PCA31118_05254	B6_02608, B6_04046	PCE31106_01461	PCE31107_03382	PCO31010_02699, PCO31010_04407	PCO31110_03853	PCO31111_03871	kb944444_pro_22	PEP31012_03762	cp011807_pro_3031	jtcr01000010_pro_85, jtcr01000013_pro_39	jtcs01000025_pro_234, jtcs01000025_pro_79	PFI31113_03548, PFI31113_04545	PHO31112_04074	PIN31009_04238	PIN31115_03209	PMO31116_00226, PMO31116_02084	cp013480_pro_1358	PNO31109_01767	cp011253_pro_3289	PPN31114_04287	cp006900_pro_1169, cp006900_pro_1959
OG0000171	NA	PAN31117_05207	PAN31108_00043, PAN31108_04708	cp011501_pro_283, cp011501_pro_3275	cp013481_pro_3209, cp013481_pro_4771	cp014018_pro_3600, cp014018_pro_678	PAP18089_00294, PAP18089_04332	rhsh01000011_pro_52, rhsh01000015_pro_64	rhsg01000005_pro_273, rhsg01000015_pro_64	rwhx01000008_pro_64, rwhx01000012_pro_22	pyya01000003_pro_182, pyya01000016_pro_23	rzmt01000002_pro_145, rzmt01000013_pro_22	rzmu01000004_pro_47, rzmu01000038_pro_24	rwhw01000004_pro_42, rwhw01000045_pro_16	nbta01000009_pro_470, nbta01000017_pro_65	rses01000005_pro_91, rses01000017_pro_16	rzmv01000010_pro_47, rzmv01000043_pro_16	rqxy01000004_pro_64, rqxy01000045_pro_16	rser01000015_pro_21, rser01000021_pro_48	rrcr01000009_pro_64, rrcr01000033_pro_22	rwhv01000007_pro_63, rwhv01000046_pro_22	cp011279_pro_1639, cp011279_pro_3349	cp010518_pro_1638, cp010518_pro_3332	PAQ31011_04862	PBR20603_00797, PBR20603_04328, PBR20603_04366	maos01000061_pro_85	NA	PCA31118_00525	NA	NA	NA	PCO31010_01194	PCO31110_02074	PCO31111_02394, PCO31111_02430	kb944426_pro_218, kb944429_pro_37	PEP31012_00102	NA	jtcr01000002_pro_42, jtcr01000013_pro_23	jtcs01000013_pro_42, jtcs01000025_pro_250	PFI31113_02608	PHO31112_02639, PHO31112_02731, PHO31112_04253	NA	NA	PMO31116_02689	cp013480_pro_1520	PNO31109_03571	NA	PPN31114_04132	cp006900_pro_1333
OG0000172	muhy01000001_pro_355	PAN31117_02448, PAN31117_02928	PAN31108_02468	cp011501_pro_1310	cp013481_pro_3744	cp014018_pro_1714	PAP18089_03556	rhsh01000010_pro_127	rhsg01000008_pro_127	rwhx01000006_pro_126	pyya01000010_pro_127	rzmt01000009_pro_126	rzmu01000065_pro_5	rwhw01000078_pro_15	nbta01000010_pro_209	rses01000078_pro_5	rzmv01000063_pro_15	rqxy01000075_pro_5	rser01000007_pro_122	rrcr01000007_pro_126	rwhv01000006_pro_125	cp011279_pro_4365	cp010518_pro_4350	PAQ31011_03972, PAQ31011_04217	PBR20603_02171	maos01000013_pro_3, maos01000050_pro_145	PCA20602_03399, PCA20602_03930	PCA31118_03159	B6_03775	PCE31106_02060	PCE31107_03189	PCO31010_03365, PCO31010_04048	PCO31110_04937	PCO31111_03714	kb944425_pro_113	PEP31012_02640	cp011807_pro_1021, cp011807_pro_1250	jtcr01000009_pro_55, jtcr01000064_pro_4	jtcs01000044_pro_12, jtcs01000058_pro_4	PFI31113_01918, PFI31113_02390	PHO31112_00682	PIN31009_01266, PIN31009_01505	PIN31115_01453, PIN31115_01687	PMO31116_02998	cp013480_pro_3725, cp013480_pro_3956	PNO31109_03271	cp011253_pro_1319	PPN31114_04649, PPN31114_04884	cp006900_pro_3090
OG0000173	NA	PAN31117_00659, PAN31117_04652	PAN31108_00063, PAN31108_03703	NA	cp013481_pro_3520	NA	NA	rhsh01000012_pro_90	rhsg01000014_pro_90	NA	NA	NA	NA	NA	NA	NA	NA	NA	NA	NA	NA	NA	NA	PAQ31011_00386, PAQ31011_02156, PAQ31011_03984	PBR20603_03626, PBR20603_04513	maos01000028_pro_140, maos01000039_pro_188, maos01000039_pro_95, maos01000050_pro_158	PCA20602_02987, PCA20602_03410, PCA20602_03417	PCA31118_00764, PCA31118_03234	NA	NA	NA	PCO31010_00396	PCO31110_02436, PCO31110_02927	PCO31111_00074, PCO31111_03408	kb944423_pro_14	PEP31012_04348	NA	jtcr01000011_pro_42	jtcs01000008_pro_42	PFI31113_01507	PHO31112_02238, PHO31112_05176	PIN31009_00740, PIN31009_00741, PIN31009_00754, PIN31009_01463, PIN31009_03443, PIN31009_04203	PIN31115_00916, PIN31115_00917, PIN31115_00930	PMO31116_00629	cp013480_pro_1643, cp013480_pro_2466, cp013480_pro_639, cp013480_pro_640, cp013480_pro_653	NA	cp011253_pro_2452	PPN31114_02734, PPN31114_04873	cp006900_pro_1603
OG0000174	NA	PAN31117_01791, PAN31117_04275	NA	cp011501_pro_3973	cp013481_pro_1025	cp014018_pro_4399	PAP18089_01934, PAP18089_05324	rhsh01000006_pro_41	rhsg01000004_pro_228	rwhx01000007_pro_101, rwhx01000038_pro_4	pyya01000008_pro_41	rzmt01000004_pro_233, rzmt01000037_pro_44	rzmu01000007_pro_44, rzmu01000007_pro_94, rzmu01000009_pro_10	rwhw01000091_pro_10	nbta01000023_pro_29, nbta01000023_pro_732	rses01000018_pro_78, rses01000038_pro_4	rzmv01000021_pro_10, rzmv01000028_pro_44	rqxy01000020_pro_10, rqxy01000040_pro_44	rser01000005_pro_98, rser01000039_pro_4	rrcr01000041_pro_44, rrcr01000050_pro_10	rwhv01000015_pro_10, rwhv01000082_pro_4	cp011279_pro_2337	cp010518_pro_2336	PAQ31011_01084	PBR20603_01009	maos01000024_pro_76	PCA20602_00884, PCA20602_04329	NA	B6_00484	PCE31106_03187	PCE31107_00151	PCO31010_00209, PCO31010_01077	PCO31110_01878	PCO31111_01050	kb944426_pro_78	PEP31012_04362, PEP31012_04476	NA	NA	NA	NA	PHO31112_04016	NA	NA	PMO31116_01959, PMO31116_02724	NA	NA	cp011253_pro_3003	NA	cp006900_pro_1365, cp006900_pro_284
OG0000175	NA	PAN31117_02246, PAN31117_05370	PAN31108_04417, PAN31108_05150	cp011501_pro_217	cp013481_pro_40	cp014018_pro_631	PAP18089_00232	rhsh01000011_pro_99	rhsg01000005_pro_226	rwhx01000008_pro_19	pyya01000003_pro_82	rzmt01000002_pro_81	rzmu01000004_pro_92	rwhw01000099_pro_4	nbta01000009_pro_408	rses01000005_pro_46	rzmv01000010_pro_92	rqxy01000004_pro_19	rser01000022_pro_6	rrcr01000009_pro_19	rwhv01000007_pro_19	cp011279_pro_3235, cp011279_pro_3253, cp011279_pro_3271, cp011279_pro_3289	cp010518_pro_3237, cp010518_pro_3255, cp010518_pro_3273	PAQ31011_01149	PBR20603_00851	maos01000022_pro_66, maos01000036_pro_18, maos01000079_pro_5	PCA20602_01405	PCA31118_01102, PCA31118_05378	B6_02079, B6_04013	PCE31106_00609, PCE31106_00704, PCE31106_03277	PCE31107_00040	PCO31010_01530	PCO31110_01039	PCO31111_01381	kb944459_pro_20	PEP31012_01031, PEP31012_04612	cp011807_pro_4402	jtcr01000005_pro_6	jtcs01000019_pro_6	PFI31113_03327	PHO31112_02567	PIN31009_00045	PIN31115_00231, PIN31115_02863	PMO31116_01629, PMO31116_02862	cp013480_pro_5196	PNO31109_02030	cp011253_pro_4681	PPN31114_02074	cp006900_pro_4051
OG0000176	NA	PAN31117_02863	PAN31108_00179, PAN31108_02396	cp011501_pro_1371	cp013481_pro_3681	cp014018_pro_1777	PAP18089_03483	rhsh01000013_pro_50	rhsg01000008_pro_191	rwhx01000040_pro_2	pyya01000013_pro_63	rzmt01000011_pro_49	rzmu01000013_pro_63	rwhw01000039_pro_2	nbta01000014_pro_28	rses01000034_pro_49	rzmv01000012_pro_63	rqxy01000014_pro_57	rser01000010_pro_62	rrcr01000051_pro_38	rwhv01000042_pro_49	cp011279_pro_4426	cp010518_pro_4411	PAQ31011_00461, PAQ31011_04281	PBR20603_02108	maos01000013_pro_69, maos01000034_pro_35	PCA20602_01106, PCA20602_03862	PCA31118_03227	B6_03833	PCE31106_02005	PCE31107_01842, PCE31107_03132	PCO31010_00519, PCO31010_03299	PCO31110_04982	PCO31111_03753	kb944425_pro_70	PEP31012_02697	cp011807_pro_1085	jtcr01000017_pro_14	jtcs01000021_pro_14	PFI31113_02455	PHO31112_00723	PIN31009_01331, PIN31009_02720	PIN31115_01517, PIN31115_03574	PMO31116_02937	cp013480_pro_2111, cp013480_pro_3893	PNO31109_03312	cp011253_pro_1131, cp011253_pro_2526	PPN31114_00498, PPN31114_04718	cp006900_pro_3033
OG0000177	NA	PAN31117_03348	PAN31108_00005, PAN31108_01061, PAN31108_03133, PAN31108_03142, PAN31108_03183, PAN31108_03262, PAN31108_05166	cp011501_pro_323	cp013481_pro_4731	cp014018_pro_719	PAP18089_00336	rhsh01000011_pro_12	rhsg01000005_pro_313	rwhx01000008_pro_104	pyya01000003_pro_222	rzmt01000002_pro_185	rzmu01000004_pro_8	rwhw01000004_pro_82	nbta01000009_pro_511	rses01000005_pro_131	rzmv01000010_pro_8	rqxy01000004_pro_104	rser01000021_pro_8	rrcr01000009_pro_104	rwhv01000007_pro_103	cp011279_pro_3389	cp010518_pro_3372	PAQ31011_01217	PBR20603_00750	maos01000002_pro_6, maos01000036_pro_3, maos01000061_pro_125	PCA20602_01468	PCA31118_01197	B6_00497	PCE31106_03174, PCE31106_03201	PCE31107_00119, PCE31107_00140, PCE31107_00164	PCO31010_01609	PCO31110_00923, PCO31110_03565	PCO31111_00727	kb944452_pro_45, kb944454_pro_935	PEP31012_04373	cp011807_pro_24	jtcr01000027_pro_85	jtcs01000018_pro_85	PFI31113_02992	PHO31112_00542	PIN31009_00136, PIN31009_02990	PIN31115_00343, PIN31115_02587	PMO31116_01560	cp013480_pro_50	NA	NA	PPN31114_02159	cp006900_pro_3989
OG0000178	NA	PAN31117_03349	PAN31108_01060, PAN31108_03132, PAN31108_03143	cp011501_pro_324	cp013481_pro_4730	cp014018_pro_720	PAP18089_00337	rhsh01000011_pro_11	rhsg01000005_pro_314	rwhx01000008_pro_105	pyya01000003_pro_223	rzmt01000002_pro_186	rzmu01000004_pro_7	rwhw01000004_pro_83	nbta01000009_pro_512	rses01000005_pro_132	rzmv01000010_pro_7	rqxy01000004_pro_105	rser01000021_pro_7	rrcr01000009_pro_105	rwhv01000007_pro_104	cp011279_pro_3390	cp010518_pro_3373	PAQ31011_01218	PBR20603_00749	maos01000002_pro_7, maos01000036_pro_2, maos01000061_pro_126, maos01000073_pro_1	PCA20602_01469	PCA31118_01198	B6_00498	PCE31106_03173, PCE31106_03200	PCE31107_00120, PCE31107_00165	PCO31010_01610	PCO31110_00922, PCO31110_03564	PCO31111_00726	kb944452_pro_46, kb944454_pro_934	PEP31012_04374	cp011807_pro_25	jtcr01000027_pro_86	jtcs01000018_pro_86	PFI31113_02991	PHO31112_00541	PIN31009_00137, PIN31009_02989	PIN31115_00344, PIN31115_02586	PMO31116_01559	cp013480_pro_51	NA	NA	PPN31114_02160	cp006900_pro_3988
OG0000179	NA	PAN31117_04423	PAN31108_01402, PAN31108_03139	cp011501_pro_3367	cp013481_pro_1629	cp014018_pro_3791	PAP18089_03025	rhsh01000003_pro_38	rhsg01000006_pro_38	rwhx01000048_pro_12	pyya01000019_pro_12	rzmt01000017_pro_77	rzmu01000040_pro_12	rwhw01000047_pro_12	nbta01000013_pro_250	rses01000050_pro_12	rzmv01000016_pro_77	rqxy01000050_pro_17	rser01000040_pro_26	rrcr01000045_pro_23	rwhv01000049_pro_12	cp011279_pro_1731	cp010518_pro_1730	PAQ31011_03527	PBR20603_04224	maos01000083_pro_106	PCA20602_02066	PCA31118_01583, PCA31118_04617	B6_04232	PCE31106_01400	PCE31107_03445	PCO31010_04894	PCO31110_03927	PCO31111_03809	kb944444_pro_94	PEP31012_03821	cp011807_pro_2970, cp011807_pro_383	jtcr01000010_pro_26	jtcs01000025_pro_138	PFI31113_04479	PHO31112_04137	PIN31009_00736, PIN31009_03228	PIN31115_00912, PIN31115_03141	PMO31116_02025	cp013480_pro_1422, cp013480_pro_635	PNO31109_00084, PNO31109_01708	cp011253_pro_3230	PPN31114_04227	cp006900_pro_1220, cp006900_pro_3362
OG0000180	NA	NA	NA	cp011501_pro_1142	NA	cp014018_pro_1526	PAP18089_04948	NA	NA	NA	NA	NA	NA	NA	nbta01000005_pro_73	NA	NA	NA	NA	NA	NA	cp011279_pro_4209	cp010518_pro_4194	NA	NA	NA	NA	NA	NA	PCE31106_04782	NA	NA	PCO31110_00024, PCO31110_00025, PCO31110_04734, PCO31110_04750, PCO31110_04751	PCO31111_00779, PCO31111_00780, PCO31111_03911, PCO31111_04409	kb944429_pro_84, kb944454_pro_998, kb944454_pro_999	NA	cp011808_pro_274, cp011808_pro_286, cp011809_pro_70	NA	NA	NA	PHO31112_00554, PHO31112_00555, PHO31112_04048, PHO31112_05349	NA	PIN31115_04411, PIN31115_04412	NA	NA	NA	cp011253_pro_1867, cp011253_pro_1868, cp011253_pro_2916, cp011253_pro_3073, cp011253_pro_3076, cp011253_pro_3145, cp011253_pro_3283, cp011253_pro_378, cp011518_pro_273, cp011518_pro_88, cp011520_pro_6, cp011521_pro_24	NA	cp006900_pro_1288
OG0000181	NA	PAN31117_00963	PAN31108_00442	cp011501_pro_2974	cp013481_pro_2901	cp014018_pro_3293	PAP18089_02461	rhsh01000026_pro_45	rhsg01000022_pro_45	rwhx01000025_pro_10	pyya01000012_pro_108	rzmt01000027_pro_35	rzmu01000021_pro_56	rwhw01000032_pro_4	nbta01000023_pro_436	rses01000067_pro_22	rzmv01000067_pro_3	rqxy01000073_pro_7	rser01000020_pro_23	rrcr01000020_pro_13	rwhv01000022_pro_42	cp011279_pro_1338	cp010518_pro_1337	PAQ31011_00736	PBR20603_01193	maos01000053_pro_30	PCA20602_01353	PCA31118_00454	B6_01647, B6_03888, B6_04072	PCE31106_03363, PCE31106_04002	PCE31107_01796, PCE31107_04024	PCO31010_00742	PCO31110_00115, PCO31110_01546	PCO31111_00834, PCO31111_04266	kb944428_pro_45, kb944454_pro_109	PEP31012_01885	cp011807_pro_2499	jtcr01000035_pro_32	jtcs01000014_pro_287	PFI31113_00201	PHO31112_04592	PIN31009_03062	PIN31115_02645	PMO31116_00588	cp013480_pro_1858	PNO31109_04283	cp011253_pro_2741	PPN31114_00112	cp006900_pro_1686
OG0000182	NA	PAN31117_01964, PAN31117_05168	PAN31108_02619, PAN31108_03394	cp011501_pro_2430	NA	cp014018_pro_2819	PAP18089_04003	rhsh01000001_pro_389	rhsg01000001_pro_429	rwhx01000014_pro_55	pyya01000023_pro_54	rzmt01000010_pro_55	rzmu01000017_pro_55	rwhw01000012_pro_17	nbta01000006_pro_129	rses01000002_pro_104, rses01000002_pro_53	rzmv01000017_pro_27	rqxy01000018_pro_53	rser01000023_pro_17	rrcr01000014_pro_55	rwhv01000005_pro_62	cp011279_pro_794	cp010518_pro_794	PAQ31011_00054, PAQ31011_04811	PBR20603_00924	maos01000046_pro_2	PCA20602_00781	PCA31118_01032	NA	PCE31106_01320	PCE31107_00767	PCO31010_00058, PCO31010_01256	PCO31110_04421	PCO31111_02121	kb944424_pro_64	NA	cp011807_pro_2029	jtcr01000037_pro_124	jtcs01000026_pro_124	PFI31113_00708	PHO31112_03849	PIN31009_00809, PIN31009_03825	PIN31115_00979, PIN31115_04069	PMO31116_00055	cp013480_pro_1653, cp013480_pro_2664, cp013480_pro_701	PNO31109_00969	cp011253_pro_2183	PPN31114_01003, PPN31114_02793	cp006900_pro_2087
OG0000183	NA	PAN31117_02774	PAN31108_01927, PAN31108_04136, PAN31108_05056	NA	cp013481_pro_2209	cp014018_pro_2564	PAP18089_01713	rhsh01000004_pro_333	rhsg01000002_pro_444	rwhx01000001_pro_15	pyya01000001_pro_495	rzmt01000001_pro_253	rzmu01000001_pro_426	rwhw01000040_pro_34	nbta01000022_pro_120	rses01000030_pro_35	rzmv01000002_pro_256	rqxy01000079_pro_11	rser01000003_pro_162	rrcr01000053_pro_34	rwhv01000035_pro_15	cp011279_pro_471	cp010518_pro_471	PAQ31011_02576, PAQ31011_03473	PBR20603_02015	maos01000038_pro_95, maos01000065_pro_19	PCA20602_00355, PCA20602_02779	PCA31118_05338	B6_01715, B6_03034	PCE31106_02298, PCE31106_04027, PCE31106_04772	PCE31107_03612, PCE31107_04623	PCO31010_02442, PCO31010_03092	PCO31110_02702	PCO31111_04957	kb944423_pro_200	PEP31012_00827, PEP31012_03280, PEP31012_04299	cp011807_pro_1794	jtcr01000021_pro_35	jtcs01000017_pro_105	PFI31113_03887	PHO31112_01226	PIN31009_02263	PIN31115_02453	PMO31116_04196	cp013480_pro_3020	PNO31109_03638	cp011253_pro_1917	PPN31114_01267	cp006900_pro_2321
OG0000184	NA	PAN31117_03777	PAN31108_03181, PAN31108_05116	cp011501_pro_2205	cp013481_pro_2231	cp014018_pro_2586	PAP18089_04387	rhsh01000004_pro_356	rhsg01000002_pro_467	rwhx01000071_pro_12	pyya01000001_pro_517	rzmt01000001_pro_275	rzmu01000001_pro_448	rwhw01000040_pro_12	nbta01000022_pro_12	rses01000030_pro_57	rzmv01000002_pro_277	rqxy01000064_pro_16	rser01000003_pro_185	rrcr01000061_pro_16	rwhv01000079_pro_8	cp011279_pro_568	cp010518_pro_568	PAQ31011_04368	PBR20603_04795	maos01000001_pro_220, maos01000064_pro_12	PCA20602_05048	PCA31118_03768	NA	NA	NA	PCO31010_05331	PCO31110_02730	PCO31111_04432	kb944423_pro_175	PEP31012_00048, PEP31012_02609	cp011807_pro_1816	jtcr01000020_pro_63, jtcr01000021_pro_55	jtcs01000014_pro_63, jtcs01000017_pro_85	PFI31113_03863	PHO31112_01255	PIN31009_03574	PIN31115_05061	PMO31116_03337	cp013480_pro_2913	PNO31109_02667	cp011253_pro_1939	PPN31114_00744, PPN31114_01243	cp006900_pro_2301
OG0000185	muhy01000001_pro_115	PAN31117_02647, PAN31117_03153	PAN31108_01569, PAN31108_03649	cp011501_pro_1993	cp013481_pro_2069, cp013481_pro_2089	cp014018_pro_2444	PAP18089_01512	rhsh01000004_pro_213	rhsg01000002_pro_324	rwhx01000001_pro_135	pyya01000001_pro_375	rzmt01000001_pro_133	rzmu01000001_pro_306	rwhw01000002_pro_138	nbta01000022_pro_311	rses01000001_pro_222	rzmv01000002_pro_137	rqxy01000001_pro_79	rser01000003_pro_44	rrcr01000003_pro_86	rwhv01000002_pro_78	cp011279_pro_356	cp010518_pro_356	PAQ31011_03061, PAQ31011_03340	PBR20603_01876	maos01000028_pro_181, maos01000105_pro_81	PCA20602_02580, PCA20602_02943	PCA31118_02929, PCA31118_04774	B6_03116	PCE31106_01729	PCE31107_02285	PCO31010_02690, PCO31010_02968	PCO31110_02568	PCO31111_01965	kb944423_pro_343	PEP31012_02502	cp011807_pro_1680	jtcr01000012_pro_27	jtcs01000007_pro_74	PFI31113_01217	PHO31112_01098	PIN31009_02138	PIN31115_02329	PMO31116_04602	cp013480_pro_3137	PNO31109_01647	cp011253_pro_1531, cp011253_pro_1786	PPN31114_01396	cp006900_pro_2475
OG0000186	NA	PAN31117_00130	PAN31108_00769, PAN31108_03217	cp011501_pro_576	cp013481_pro_4472	cp014018_pro_982	PAP18089_00599	rhsh01000005_pro_231	rhsg01000007_pro_232	rwhx01000004_pro_42	pyya01000002_pro_172	rzmt01000003_pro_139	rzmu01000003_pro_139	rwhw01000003_pro_62	nbta01000008_pro_170	rses01000003_pro_34	rzmv01000001_pro_171	rqxy01000002_pro_34	rser01000001_pro_139	rrcr01000001_pro_139	rwhv01000001_pro_50	cp011279_pro_3643	cp010518_pro_3626	PAQ31011_01521	PBR20603_00481	maos01000030_pro_104	PCA20602_01788	PCA31118_01507, PCA31118_01671	B6_04318	PCE31106_00320	PCE31107_00442	PCO31010_01927	PCO31110_00659	NA	kb944454_pro_661	PEP31012_01374	cp011807_pro_314	jtcr01000018_pro_153	jtcs01000016_pro_153	PFI31113_01832	PHO31112_00265	PIN31009_00475	PIN31115_00653	PMO31116_00154, PMO31116_01271	cp013480_pro_361	PNO31109_00481	cp011253_pro_326	PPN31114_02480	cp006900_pro_3729
OG0000187	NA	PAN31117_00174, PAN31117_03314	PAN31108_00722	cp011501_pro_617	cp013481_pro_4430	cp014018_pro_1024	PAP18089_00642	rhsh01000002_pro_30	rhsg01000003_pro_30	rwhx01000004_pro_1	pyya01000002_pro_214	rzmt01000003_pro_98	rzmu01000003_pro_98	rwhw01000003_pro_21	nbta01000008_pro_212	rses01000003_pro_75	rzmv01000001_pro_212	rqxy01000002_pro_75	rser01000001_pro_98	rrcr01000001_pro_98	rwhv01000001_pro_9	cp011279_pro_3685	cp010518_pro_3668	PAQ31011_01567	PBR20603_00439	maos01000043_pro_41	PCA20602_01833	PCA31118_01550	B6_01404	PCE31106_00367	PCE31107_00479	PCO31010_01974	PCO31110_00615, PCO31110_02750	PCO31111_00436	kb944454_pro_617	PEP31012_01337	cp011807_pro_352	jtcr01000013_pro_52, jtcr01000029_pro_14	jtcs01000006_pro_24, jtcs01000025_pro_221	PFI31113_01787, PFI31113_03584	PHO31112_00221	PIN31009_00520, PIN31009_01139	PIN31115_00698, PIN31115_01330	PMO31116_01228	cp013480_pro_1026, cp013480_pro_404	PNO31109_00442	cp011253_pro_371	PPN31114_02523, PPN31114_03120	cp006900_pro_3693
OG0000188	NA	PAN31117_00244	PAN31108_00652	cp011501_pro_682	cp013481_pro_256, cp013481_pro_4362	cp014018_pro_1093	PAP18089_00712	rhsh01000002_pro_100	rhsg01000003_pro_100	rwhx01000016_pro_68	pyya01000002_pro_282	rzmt01000003_pro_30	rzmu01000003_pro_30	rwhw01000015_pro_30	nbta01000008_pro_282	rses01000003_pro_144	rzmv01000001_pro_280	rqxy01000002_pro_143	rser01000001_pro_30	rrcr01000001_pro_30	rwhv01000041_pro_21	cp011279_pro_3750	cp010518_pro_3733	PAQ31011_01636	PBR20603_00369	maos01000001_pro_468	PCA20602_01901	PCA31118_01624	B6_04151	PCE31106_00429	PCE31107_00543	PCO31010_02042	PCO31110_00546, PCO31110_01269	PCO31111_00368, PCO31111_01143	kb944454_pro_546, kb944456_pro_212	PEP31012_01274	cp011807_pro_424	jtcr01000003_pro_36	jtcs01000004_pro_65	PFI31113_01717	PHO31112_00151	PIN31009_00588	PIN31115_00766	PMO31116_01160, PMO31116_02854	cp013480_pro_472	PNO31109_00375, PNO31109_02792	cp011253_pro_445	PPN31114_02591	cp006900_pro_1474, cp006900_pro_3640
OG0000189	NA	PAN31117_00286	PAN31108_02965, PAN31108_03890	cp011501_pro_723	cp013481_pro_4320	cp014018_pro_1134	PAP18089_00754	rhsh01000002_pro_141	rhsg01000003_pro_141	rwhx01000015_pro_12	pyya01000007_pro_155	rzmt01000042_pro_12	rzmu01000018_pro_12	rwhw01000009_pro_12	nbta01000008_pro_323	rses01000015_pro_11	rzmv01000018_pro_12	rqxy01000017_pro_12	rser01000016_pro_12	rrcr01000054_pro_12	rwhv01000013_pro_12	cp011279_pro_3791	cp010518_pro_3774	PAQ31011_01679, PAQ31011_03065	PBR20603_00328	maos01000026_pro_48	PCA20602_00049, PCA20602_01945	PCA31118_01714	B6_00825, B6_04043	PCE31106_00470	PCE31107_00584	PCO31010_02085, PCO31010_02696	PCO31110_00504	PCO31111_00326	kb944454_pro_504	PEP31012_01233	cp011807_pro_467	jtcr01000003_pro_75, jtcr01000013_pro_36	jtcs01000004_pro_26, jtcs01000025_pro_237	PFI31113_01675, PFI31113_03545	PHO31112_00109	PIN31009_00631	PIN31115_00809	PMO31116_00222, PMO31116_01118	cp013480_pro_535	PNO31109_00333	cp011253_pro_488	PPN31114_02633	cp006900_pro_1962, cp006900_pro_3599
OG0000190	NA	PAN31117_00939	PAN31108_00417	cp011501_pro_2952	cp013481_pro_2878	cp014018_pro_3270	PAP18089_02438	rhsh01000026_pro_22	rhsg01000022_pro_22	rwhx01000025_pro_33	pyya01000012_pro_131	rzmt01000027_pro_58	rzmu01000021_pro_33	rwhw01000032_pro_27	nbta01000023_pro_414	rses01000044_pro_19	rzmv01000041_pro_19	rqxy01000048_pro_17	rser01000020_pro_45	rrcr01000020_pro_36	rwhv01000022_pro_19	cp011279_pro_1316	cp010518_pro_1315	PAQ31011_00711	PBR20603_00082, PBR20603_01166	maos01000023_pro_16	PCA20602_01328	PCA31118_00478	B6_02422	PCE31106_03773, PCE31106_03979	PCE31107_01819	PCO31010_00718	PCO31110_01519, PCO31110_04768	PCO31111_00810, PCO31111_02417	kb944428_pro_71, kb944429_pro_66	PEP31012_00806, PEP31012_01863	cp011807_pro_2474	jtcr01000035_pro_12	jtcs01000014_pro_307	PFI31113_00226	PHO31112_02759, PHO31112_03499	PIN31009_03038	PIN31115_02621	PMO31116_00565	cp013480_pro_1881	PNO31109_00632	cp011253_pro_2717	PPN31114_00136	cp006900_pro_1704, cp006900_pro_862
OG0000191	NA	PAN31117_01845, PAN31117_01928	PAN31108_02656, PAN31108_02747	cp011501_pro_2464	NA	cp014018_pro_2853	PAP18089_04039	rhsh01000001_pro_355	rhsg01000001_pro_395	rwhx01000062_pro_17, rwhx01000068_pro_8	pyya01000015_pro_16, pyya01000050_pro_17	rzmt01000010_pro_89, rzmt01000055_pro_17	rzmu01000002_pro_17, rzmu01000035_pro_8	rwhw01000041_pro_28, rwhw01000049_pro_17	nbta01000006_pro_94	rses01000040_pro_28, rses01000074_pro_10	rzmv01000026_pro_8, rzmv01000053_pro_17	rqxy01000013_pro_17, rqxy01000053_pro_24	rser01000002_pro_240, rser01000019_pro_18	rrcr01000002_pro_17, rrcr01000022_pro_52	rwhv01000005_pro_28, rwhv01000063_pro_17	cp011279_pro_828	cp010518_pro_828	PAQ31011_00098	PBR20603_00958	maos01000046_pro_39	PCA20602_00817	PCA31118_00987	B6_02732	PCE31106_03098	PCE31107_02186	PCO31010_00094	PCO31110_04456, PCO31110_04596	NA	kb944424_pro_99	NA	cp011807_pro_2069	jtcr01000037_pro_152	jtcs01000026_pro_152	PFI31113_00574, PFI31113_00671	PHO31112_03229, PHO31112_03813	PIN31009_03870	PIN31115_04024	PMO31116_00091	cp013480_pro_2564	PNO31109_00934	cp011253_pro_2220	PPN31114_00963	cp006900_pro_2063
OG0000192	NA	PAN31117_01888	PAN31108_02686	cp011501_pro_2491	cp013481_pro_2477	cp014018_pro_2882	PAP18089_04070	rhsh01000001_pro_326	rhsg01000001_pro_366	rwhx01000047_pro_23	pyya01000015_pro_45	rzmt01000026_pro_23	rzmu01000053_pro_2	rwhw01000066_pro_1	nbta01000006_pro_65	rses01000064_pro_23	rzmv01000026_pro_37	rqxy01000062_pro_2	rser01000019_pro_47	rrcr01000022_pro_23	rwhv01000066_pro_23	cp011279_pro_855	cp010518_pro_855	PAQ31011_00134	PBR20603_00987	maos01000052_pro_23	PCA20602_00852	PCA31118_00956	B6_02750	PCE31106_03117	PCE31107_02168	PCO31010_00131	PCO31110_02777, PCO31110_04481	PCO31111_02176	kb944423_pro_151, kb944424_pro_124	PEP31012_04162	cp011807_pro_2099	jtcr01000004_pro_8, jtcr01000021_pro_77	jtcs01000017_pro_63, jtcs01000034_pro_87	PFI31113_00641, PFI31113_03793	PHO31112_01282, PHO31112_03784	PIN31009_02297, PIN31009_03602	PIN31115_03987, PIN31115_05089	PMO31116_00118	cp013480_pro_2531, cp013480_pro_2890	PNO31109_00912, PNO31109_02643	cp011253_pro_2252	PPN31114_00923, PPN31114_01214	cp006900_pro_2045
OG0000193	NA	PAN31117_02306	PAN31108_05186	cp011501_pro_1450	cp013481_pro_3617	cp014018_pro_1846	PAP18089_04894	rhsh01000023_pro_1	rhsg01000019_pro_1	rwhx01000066_pro_22	pyya01000054_pro_22	rzmt01000053_pro_22	rzmu01000058_pro_1	rwhw01000071_pro_22	nbta01000014_pro_93	rses01000072_pro_22	rzmv01000056_pro_22	rqxy01000071_pro_22	rser01000062_pro_22	rrcr01000065_pro_22	rwhv01000074_pro_22	cp011279_pro_4505	cp010518_pro_4490	PAQ31011_04105	PBR20603_00080, PBR20603_03063	maos01000063_pro_1	PCA20602_03539	PCA31118_03520	B6_03483	PCE31106_03703, PCE31106_03771	PCE31107_02781, PCE31107_04273	PCO31010_03229	PCO31110_04624, PCO31110_04770	PCO31111_02415, PCO31111_02534	kb944429_pro_153, kb944429_pro_64	PEP31012_00808, PEP31012_01817, PEP31012_02768	cp011807_pro_1160	jtcr01000033_pro_2	jtcs01000052_pro_2	PFI31113_02524	PHO31112_02757, PHO31112_05295	PIN31009_01396	PIN31115_01582	PMO31116_04212	cp013480_pro_3831	PNO31109_03068	cp011253_pro_1203	PPN31114_04783	cp006900_pro_2976
OG0000194	NA	PAN31117_02913	PAN31108_02453	cp011501_pro_1325	cp013481_pro_3729	cp014018_pro_1729	PAP18089_03541, PAP18089_04141	rhsh01000013_pro_1	rhsg01000008_pro_142	rwhx01000040_pro_50, rwhx01000069_pro_1	pyya01000013_pro_110, pyya01000055_pro_1	rzmt01000011_pro_1, rzmt01000054_pro_1	rzmu01000007_pro_69, rzmu01000013_pro_111	rwhw01000039_pro_50	nbta01000023_pro_1	rses01000034_pro_1, rses01000075_pro_1	rzmv01000012_pro_111, rzmv01000028_pro_69	rqxy01000014_pro_105	rser01000010_pro_109, rser01000088_pro_4	rrcr01000075_pro_1	rwhv01000042_pro_1, rwhv01000076_pro_1	cp011279_pro_4380	cp010518_pro_4365	PAQ31011_04232	PBR20603_02156	maos01000013_pro_18	PCA20602_03915	PCA31118_03174	B6_02921	PCE31106_02047, PCE31106_04453, PCE31106_04749	PCE31107_02114, PCE31107_03174	PCO31010_03350	PCO31110_04952	PCO31111_03729	kb944425_pro_98	PEP31012_02653, PEP31012_04206	cp011807_pro_1036	jtcr01000017_pro_59	jtcs01000021_pro_59	PFI31113_02405	PHO31112_00697	PIN31009_01281	PIN31115_01468	PMO31116_02983	cp013480_pro_3941	PNO31109_03288	cp011253_pro_1079	PPN31114_04664	cp006900_pro_3075
OG0000195	NA	PAN31117_03283	PAN31108_04759	cp011501_pro_1642	cp013481_pro_3364	cp014018_pro_2075	PAP18089_05261	rhsh01000031_pro_3	rhsg01000024_pro_3	rwhx01000034_pro_3	pyya01000003_pro_124, pyya01000033_pro_49	rzmt01000031_pro_48	rzmu01000026_pro_48	rwhw01000113_pro_3	nbta01000014_pro_290	rses01000039_pro_36	rzmv01000035_pro_3	rqxy01000019_pro_58, rqxy01000028_pro_48	rser01000004_pro_173, rser01000034_pro_47	rrcr01000016_pro_37, rrcr01000028_pro_48	rwhv01000043_pro_36	cp011279_pro_6	cp010518_pro_6	PAQ31011_02913	PBR20603_00073, PBR20603_00079, PBR20603_04550	maos01000047_pro_47	PCA20602_02791	PCA31118_04962	B6_01879, B6_02966	PCE31106_03440, PCE31106_03770	PCE31107_02586	PCO31010_03906	PCO31110_02165, PCO31110_04771	PCO31111_02414, PCO31111_04750	kb944429_pro_63, kb944439_pro_5	PEP31012_00809, PEP31012_00826, PEP31012_02133	cp011807_pro_1319	jtcr01000006_pro_44	jtcs01000010_pro_40	PFI31113_04771	PHO31112_02756, PHO31112_05110	PIN31009_01649	PIN31115_01831	PMO31116_04020	cp013480_pro_3565	PNO31109_04118	cp011253_pro_1411	PPN31114_01842	cp006900_pro_2823
OG0000196	NA	PAN31117_05208	PAN31108_00044, PAN31108_04707	cp011501_pro_284, cp011501_pro_3274	cp013481_pro_3208, cp013481_pro_4770	cp014018_pro_3599, cp014018_pro_679	PAP18089_00295, PAP18089_04331	rhsh01000011_pro_51, rhsh01000015_pro_63	rhsg01000005_pro_274, rhsg01000015_pro_63	rwhx01000008_pro_65, rwhx01000012_pro_23	pyya01000003_pro_183, pyya01000016_pro_24	rzmt01000002_pro_146, rzmt01000013_pro_23	rzmu01000004_pro_46, rzmu01000038_pro_23	rwhw01000004_pro_43, rwhw01000045_pro_17	nbta01000009_pro_471, nbta01000017_pro_64	rses01000005_pro_92, rses01000017_pro_17	rzmv01000010_pro_46, rzmv01000043_pro_17	rqxy01000004_pro_65, rqxy01000045_pro_17	rser01000021_pro_47	rrcr01000009_pro_65, rrcr01000033_pro_23	rwhv01000007_pro_64	cp011279_pro_1638, cp011279_pro_3350	cp010518_pro_1637, cp010518_pro_3333	PAQ31011_04863	PBR20603_00796, PBR20603_04327, PBR20603_04367	maos01000061_pro_86	NA	PCA31118_00526	NA	NA	NA	PCO31010_01193	PCO31110_02073	PCO31111_02395, PCO31111_02429	kb944426_pro_217, kb944429_pro_38	PEP31012_00103	NA	jtcr01000013_pro_22	jtcs01000025_pro_251	PFI31113_02607	PHO31112_02640, PHO31112_02732, PHO31112_04254	NA	NA	PMO31116_02690	cp013480_pro_1521	PNO31109_03572	NA	PPN31114_04131	cp006900_pro_1334
OG0000197	NA	PAN31117_05312	PAN31108_03846	cp011501_pro_4645, cp011501_pro_72	cp013481_pro_272	cp014018_pro_393, cp014018_pro_478	PAP18089_00078, PAP18089_03698	rhsh01000007_pro_74, rhsh01000027_pro_12	rhsg01000005_pro_74, rhsg01000011_pro_12	rwhx01000050_pro_10, rwhx01000094_pro_4	pyya01000025_pro_6, pyya01000042_pro_24	rzmt01000022_pro_72, rzmt01000041_pro_10	rzmu01000006_pro_73, rzmu01000048_pro_10	rwhw01000061_pro_10, rwhw01000107_pro_2	nbta01000009_pro_169, nbta01000009_pro_256	rses01000057_pro_10, rses01000080_pro_14	rzmv01000006_pro_74, rzmv01000048_pro_10	rqxy01000021_pro_2, rqxy01000052_pro_10	rser01000027_pro_6, rser01000054_pro_10	rrcr01000005_pro_73, rrcr01000052_pro_10	rwhv01000055_pro_10, rwhv01000101_pro_2	cp011279_pro_3008, cp011279_pro_3090	cp010518_pro_3010, cp010518_pro_3092	PAQ31011_04948	PBR20603_03004, PBR20603_03978	maos01000055_pro_9	PCA20602_03774	PCA31118_03669, PCA31118_04159, PCA31118_04554	NA	NA	PCE31107_03869	PCO31010_05285	PCO31110_01207	NA	kb944434_pro_169, kb944456_pro_151	NA	cp011807_pro_4159, cp011807_pro_4215	jtcr01000025_pro_46	jtcs01000029_pro_31	NA	NA	PIN31009_04899	PIN31115_00060	PMO31116_03658	cp013480_pro_5040	PNO31109_02221	cp011253_pro_4435	PPN31114_01908	NA
OG0000198	NA	NA	NA	cp011501_pro_1742	cp013481_pro_3258	cp014018_pro_2180	PAP18089_02892, PAP18089_04167, PAP18089_05196, PAP18089_05327, PAP18089_05328	rhsh01000028_pro_10	rhsg01000002_pro_55	rwhx01000005_pro_38, rwhx01000038_pro_1	pyya01000001_pro_108	rzmt01000020_pro_38, rzmt01000037_pro_47	rzmu01000001_pro_38, rzmu01000007_pro_47, rzmu01000007_pro_48, rzmu01000007_pro_90, rzmu01000007_pro_91	rwhw01000005_pro_21	nbta01000015_pro_55, nbta01000023_pro_25, nbta01000023_pro_26	rses01000021_pro_31, rses01000038_pro_1	rzmv01000022_pro_38, rzmv01000028_pro_47, rzmv01000028_pro_48	rqxy01000023_pro_31, rqxy01000040_pro_47	rser01000026_pro_31, rser01000039_pro_1, rser01000066_pro_18	rrcr01000018_pro_31, rrcr01000041_pro_47	rwhv01000018_pro_50, rwhv01000082_pro_1	cp011279_pro_106	cp010518_pro_106	PAQ31011_01955	PBR20603_01585	NA	PCA20602_00886	NA	B6_00486, B6_00487	PCE31106_03184, PCE31106_03185	PCE31107_00153, PCE31107_00154	PCO31010_00177	PCO31110_02273	PCO31111_03942	kb944439_pro_114	PEP31012_04364, PEP31012_04469, PEP31012_04472, PEP31012_04473	NA	NA	NA	NA	PHO31112_04797	PIN31009_00430	PIN31115_00606	NA	cp013480_pro_316	PNO31109_02142, PNO31109_02145	NA	PPN31114_02438	cp006900_pro_2677
OG0000199	muhy01000001_pro_372	PAN31117_02612	PAN31108_01603	cp011501_pro_1958	cp013481_pro_2027	cp014018_pro_2408	PAP18089_01476	rhsh01000004_pro_177	rhsg01000002_pro_288	rwhx01000001_pro_171	pyya01000001_pro_339	rzmt01000001_pro_97	rzmu01000001_pro_270	rwhw01000002_pro_102	nbta01000022_pro_347	rses01000001_pro_186	rzmv01000002_pro_101	rqxy01000001_pro_43	rser01000003_pro_9	rrcr01000003_pro_122	rwhv01000002_pro_42	cp011279_pro_321	cp010518_pro_321	PAQ31011_03301	PBR20603_01840	maos01000039_pro_34, maos01000105_pro_43	PCA20602_00895, PCA20602_02543	PCA31118_02893	B6_01097, B6_01179	PCE31106_00658, PCE31106_01758	PCE31107_00763, PCE31107_02314	PCO31010_02933	PCO31110_02532	PCO31111_01934	kb944423_pro_379	PEP31012_02473	cp011807_pro_1645	jtcr01000012_pro_60	jtcs01000007_pro_41	PFI31113_01180	PHO31112_01063	PIN31009_02100	PIN31115_02291	PMO31116_02614	cp013480_pro_3176	PNO31109_01612	cp011253_pro_1751	PPN31114_01436	cp006900_pro_2502
OG0000200	NA	PAN31117_00028, PAN31117_03306	NA	cp011501_pro_473	cp013481_pro_4575	cp014018_pro_878	PAP18089_00495	rhsh01000005_pro_128	rhsg01000007_pro_129	rwhx01000004_pro_145	pyya01000002_pro_69	rzmt01000003_pro_242	rzmu01000003_pro_242	rwhw01000003_pro_165	nbta01000008_pro_67	rses01000010_pro_50	rzmv01000001_pro_68	rqxy01000010_pro_50	rser01000001_pro_240	rrcr01000001_pro_241	rwhv01000001_pro_152	cp011279_pro_3540	cp010518_pro_3523	PAQ31011_01397	PBR20603_00582	maos01000040_pro_55	PCA20602_01680	PCA31118_01405	B6_02240	PCE31106_00210	PCE31107_00326	PCO31010_01819	PCO31110_00756, PCO31110_02754	NA	kb944454_pro_770	PEP31012_01468	cp011807_pro_220	jtcr01000013_pro_46, jtcr01000018_pro_63	jtcs01000016_pro_63, jtcs01000025_pro_227	PFI31113_02828, PFI31113_03577	PHO31112_00375	PIN31009_00346, PIN31009_01146	PIN31115_00523, PIN31115_01337	PMO31116_01376	cp013480_pro_1033, cp013480_pro_231	PNO31109_00576	cp011253_pro_206	PPN31114_02363, PPN31114_03127	cp006900_pro_3829
OG0000201	NA	PAN31117_00678	NA	cp011501_pro_1544, cp011501_pro_2639	cp013481_pro_2635, cp013481_pro_3467	cp014018_pro_1972, cp014018_pro_3042	PAP18089_04722, PAP18089_04797	rhsh01000001_pro_165, rhsh01000012_pro_37	rhsg01000001_pro_205, rhsg01000014_pro_37	rwhx01000002_pro_118, rwhx01000087_pro_9	pyya01000004_pro_120, pyya01000011_pro_37	rzmt01000006_pro_53, rzmt01000040_pro_36	rzmu01000002_pro_152, rzmu01000010_pro_37	rwhw01000001_pro_110, rwhw01000060_pro_9	nbta01000014_pro_187, nbta01000023_pro_188	rses01000004_pro_48, rses01000032_pro_36	rzmv01000003_pro_108, rzmv01000030_pro_36	rqxy01000007_pro_37, rqxy01000016_pro_36	rser01000002_pro_108, rser01000031_pro_35	rrcr01000002_pro_152, rrcr01000011_pro_37	rwhv01000004_pro_116, rwhv01000034_pro_37	cp011279_pro_1003, cp011279_pro_4599	cp010518_pro_1003, cp010518_pro_4584	PAQ31011_00407	PBR20603_03144	maos01000034_pro_82	PCA20602_01053	PCA31118_00743	B6_00170	NA	PCE31107_02033	PCO31010_00417	NA	NA	NA	PEP31012_03875	cp011807_pro_2250	jtcr01000002_pro_70, jtcr01000004_pro_139	jtcs01000003_pro_45, jtcs01000013_pro_70	PFI31113_00458, PFI31113_02645	NA	PIN31009_02672	PIN31115_03622	PMO31116_00310	cp013480_pro_2160	NA	cp011253_pro_2472	PPN31114_00547	cp006900_pro_1885
OG0000202	NA	PAN31117_00778, PAN31117_05251	PAN31108_00237	cp011501_pro_2768	cp013481_pro_2728	cp014018_pro_3136	PAP18089_02287	rhsh01000001_pro_72	rhsg01000001_pro_112	rwhx01000002_pro_210	pyya01000027_pro_16	rzmt01000006_pro_145	rzmu01000002_pro_243	rwhw01000001_pro_18	nbta01000023_pro_280	rses01000004_pro_140	rzmv01000003_pro_17	rqxy01000016_pro_18	rser01000002_pro_18	rrcr01000002_pro_170	rwhv01000014_pro_18	cp011279_pro_1132	cp010518_pro_1132	PAQ31011_00516	PBR20603_03603	maos01000042_pro_27	PCA20602_01172	PCA31118_00653	B6_00239	PCE31106_01645	PCE31107_01972	PCO31010_00574	PCO31110_01363, PCO31110_03481	PCO31111_01557, PCO31111_02825	kb944435_pro_80, kb944452_pro_129	PEP31012_01652	cp011807_pro_2338	jtcr01000004_pro_214	jtcs01000003_pro_120	PFI31113_00377	PHO31112_01555, PHO31112_03660	PIN31009_02785, PIN31009_05479	PIN31115_03505	PMO31116_00377	cp013480_pro_1574, cp013480_pro_2053	PNO31109_00898	cp011253_pro_2570	PPN31114_00435	cp006900_pro_1832
OG0000203	NA	PAN31117_00800, PAN31117_02534	PAN31108_00259, PAN31108_03479	cp011501_pro_2787	cp013481_pro_2748	cp014018_pro_3155	PAP18089_02309	rhsh01000001_pro_53	rhsg01000001_pro_93	rwhx01000077_pro_11	pyya01000017_pro_92	rzmt01000014_pro_4	rzmu01000002_pro_264	rwhw01000028_pro_49	nbta01000023_pro_300	rses01000013_pro_93	rzmv01000069_pro_11	rqxy01000012_pro_2	rser01000014_pro_89	rrcr01000017_pro_2	rwhv01000011_pro_93	cp011279_pro_1151	cp010518_pro_1151	PAQ31011_00252, PAQ31011_00255, PAQ31011_00538, PAQ31011_03884	PBR20603_01038	maos01000001_pro_84, maos01000042_pro_6	PCA20602_01193, PCA20602_03129	PCA31118_00630	B6_02953	PCE31106_01624	PCE31107_01951	PCO31010_00596, PCO31010_03933	PCO31110_01385	PCO31111_02847	kb944435_pro_101	PEP31012_01674	cp011807_pro_2360	jtcr01000004_pro_232	jtcs01000003_pro_138	PFI31113_00355	PHO31112_03638	PIN31009_02744, PIN31009_02853	PIN31115_03481, PIN31115_03547	PMO31116_00398	cp013480_pro_2030, cp013480_pro_2092	NA	NA	PPN31114_00411, PPN31114_01673	cp006900_pro_1814
OG0000204	NA	PAN31117_01046	PAN31108_00520	cp011501_pro_3047	cp013481_pro_2976	cp014018_pro_3369	PAP18089_02542	rhsh01000021_pro_41	rhsg01000013_pro_41	rwhx01000030_pro_21	pyya01000034_pro_21	rzmt01000021_pro_45	rzmu01000027_pro_21	rwhw01000019_pro_21	nbta01000002_pro_44	rses01000028_pro_21	rzmv01000036_pro_32	rqxy01000029_pro_21	rser01000035_pro_21	rrcr01000029_pro_21	rwhv01000027_pro_20	cp011279_pro_1411	cp010518_pro_1410	PAQ31011_00916	PBR20603_01275	maos01000067_pro_21	PCA20602_04754	PCA31118_00370	B6_03036	PCE31106_02300	PCE31107_03614	PCO31010_00897	PCO31110_01689, PCO31110_04118	PCO31111_00914, PCO31111_02698	kb944434_pro_117, kb944451_pro_84	PEP31012_03282	cp011807_pro_2575	jtcr01000035_pro_109	jtcs01000014_pro_210	PFI31113_00116	PHO31112_02979, PHO31112_03408	PIN31009_03150	PIN31115_02731	PMO31116_00675, PMO31116_03823	cp013480_pro_1772	PNO31109_02438	cp011253_pro_2814	PPN31114_00030	cp006900_pro_1558, cp006900_pro_2893
OG0000205	NA	PAN31117_02425, PAN31117_03366	PAN31108_01044	cp011501_pro_335	cp013481_pro_4719	cp014018_pro_731	PAP18089_00348	rhsh01000036_pro_25	rhsg01000005_pro_325	rwhx01000035_pro_43	pyya01000020_pro_79	rzmt01000002_pro_197	rzmu01000030_pro_5	rwhw01000004_pro_94	nbta01000001_pro_5	rses01000036_pro_43	rzmv01000019_pro_78	rqxy01000042_pro_37	rser01000018_pro_77	rrcr01000043_pro_5	rwhv01000036_pro_5	cp011279_pro_3401	cp010518_pro_3384	PAQ31011_01233, PAQ31011_04009	PBR20603_00737	maos01000002_pro_17	PCA20602_01485	PCA31118_01211	B6_04561	PCE31106_04725	PCE31107_00650, PCE31107_04514	PCO31010_01621, PCO31010_04083	PCO31110_00912	PCO31111_00716	kb944454_pro_924	PEP31012_01168, PEP31012_03730	cp011807_pro_35	jtcr01000007_pro_4	jtcs01000002_pro_31	NA	PHO31112_00529, PHO31112_02777	PIN31009_00152, PIN31009_01475	PIN31115_00359	PMO31116_00262	cp013480_pro_3755, cp013480_pro_66	PNO31109_01959	NA	PPN31114_04853	cp006900_pro_1930
OG0000206	NA	PAN31117_04182, PAN31117_04349	PAN31108_03219, PAN31108_04824	cp011501_pro_3249	cp013481_pro_3184	cp014018_pro_3575	PAP18089_04306	rhsh01000015_pro_39	rhsg01000015_pro_39	rwhx01000012_pro_48	pyya01000016_pro_49	rzmt01000013_pro_48	rzmu01000033_pro_1	rwhw01000038_pro_41	nbta01000017_pro_39	rses01000017_pro_42	rzmv01000039_pro_1	rqxy01000041_pro_1	rser01000015_pro_42	rrcr01000042_pro_1	rwhv01000040_pro_40	cp011279_pro_1613	cp010518_pro_1612	PAQ31011_04889	PBR20603_04302	maos01000061_pro_111	PCA20602_04692	PCA31118_00056, PCA31118_00123	B6_04449	PCE31106_01283	PCE31107_04293	PCO31010_01168	PCO31110_02048	PCO31111_04544	kb944426_pro_192	PEP31012_03655	cp011807_pro_2807	jtcr01000002_pro_86, jtcr01000020_pro_1	jtcs01000013_pro_86, jtcs01000014_pro_1	PFI31113_02662, PFI31113_03518	PHO31112_04280	PIN31009_02583, PIN31009_03344	PIN31115_03015, PIN31115_03717	PMO31116_02715	cp013480_pro_1546, cp013480_pro_2249	PNO31109_03597	cp011253_pro_2906, cp011253_pro_3109	PPN31114_00624, PPN31114_04106	cp006900_pro_1357
OG0000207	NA	NA	PAN31108_04725	NA	cp013481_pro_2566, cp013481_pro_3538	cp014018_pro_2973	PAP18089_04652	rhsh01000001_pro_234, rhsh01000012_pro_108	rhsg01000001_pro_274, rhsg01000014_pro_108	NA	NA	NA	NA	NA	nbta01000023_pro_118	NA	NA	NA	NA	NA	NA	NA	NA	NA	PBR20603_04468, PBR20603_04543	NA	NA	PCA31118_00894, PCA31118_01914, PCA31118_05137	B6_00513, B6_00729, B6_02347, B6_03012, B6_03562	PCE31106_00566, PCE31106_03560	PCE31107_00679, PCE31107_04167, PCE31107_04426	NA	PCO31110_04121	PCO31111_02701, PCO31111_02741	kb944434_pro_120	PEP31012_00133, PEP31012_00814, PEP31012_02239, PEP31012_04029, PEP31012_04649	NA	jtcr01000002_pro_26, jtcr01000004_pro_56, jtcr01000009_pro_288, jtcr01000028_pro_61	jtcs01000013_pro_26, jtcs01000022_pro_1, jtcs01000023_pro_61, jtcs01000034_pro_39	PFI31113_00554, PFI31113_03969	PHO31112_02641	PIN31009_02373	PIN31115_03927	PMO31116_03809	cp013480_pro_2448	NA	NA	NA	cp006900_pro_992
OG0000208	muhy01000001_pro_11	PAN31117_03683	PAN31108_01141	cp011501_pro_3604	cp013481_pro_1384	cp014018_pro_4038	PAP18089_02723	rhsh01000003_pro_284	rhsg01000006_pro_283	rwhx01000064_pro_23, rwhx01000097_pro_5	pyya01000030_pro_1, pyya01000051_pro_23	rzmt01000007_pro_1, rzmt01000076_pro_1	rzmu01000054_pro_23, rzmu01000055_pro_1	rwhw01000030_pro_61, rwhw01000067_pro_23	nbta01000003_pro_102, nbta01000013_pro_1	rses01000090_pro_1, rses01000104_pro_5	rzmv01000024_pro_23	rqxy01000036_pro_1, rqxy01000066_pro_1	rser01000059_pro_22, rser01000085_pro_1	rrcr01000077_pro_10, rrcr01000089_pro_1	rwhv01000071_pro_24, rwhv01000092_pro_1	cp011279_pro_1968	cp010518_pro_1967	PAQ31011_03782	PBR20603_02681	maos01000037_pro_20	PCA20602_02327	PCA31118_05042	B6_04370	PCE31106_02529	PCE31107_04143	PCO31010_04202	PCO31110_03666	PCO31111_03235	kb944431_pro_59	PEP31012_04053	cp011807_pro_3219	jtcr01000024_pro_87	jtcs01000037_pro_81	PFI31113_04264	PHO31112_04384	PIN31009_04444	PIN31115_03408	PMO31116_02265	cp013480_pro_1164	PNO31109_03815	cp011253_pro_3478	PPN31114_04494	cp006900_pro_1017
OG0000209	muhy01000001_pro_85	PAN31117_01554	PAN31108_01886	cp011501_pro_3949	cp013481_pro_1051	cp014018_pro_4373	PAP18089_01960	rhsh01000006_pro_15	rhsg01000004_pro_202	rwhx01000007_pro_127	pyya01000008_pro_15	rzmt01000004_pro_259	rzmu01000009_pro_36	rwhw01000063_pro_20	nbta01000023_pro_706	rses01000018_pro_52	rzmv01000021_pro_35	rqxy01000020_pro_36	rser01000005_pro_124	rrcr01000050_pro_36	rwhv01000015_pro_35	cp011279_pro_2313	cp010518_pro_2312	PAQ31011_02626	PBR20603_02547	maos01000023_pro_102, maos01000066_pro_11	PCA20602_00307	PCA31118_02220	B6_03248	PCE31106_02780	PCE31107_01178	PCO31010_02385	PCO31110_03334	PCO31111_01701	kb944457_pro_17	PEP31012_00551	cp011807_pro_3530	jtcr01000009_pro_79	jtcs01000050_pro_13	PFI31113_01893	PHO31112_01404	PIN31009_02577, PIN31009_03972	PIN31115_03723, PIN31115_04274	PMO31116_03112	cp013480_pro_1924, cp013480_pro_2255, cp013480_pro_4309	PNO31109_03412	cp011253_pro_3795	PPN31114_03413	cp006900_pro_656
OG0000210	muhy01000001_pro_177	PAN31117_01053	PAN31108_00527	cp011501_pro_3054	cp013481_pro_2983	cp014018_pro_3376	PAP18089_02549	rhsh01000021_pro_48	rhsg01000013_pro_48	rwhx01000030_pro_14	pyya01000034_pro_14	rzmt01000021_pro_38	rzmu01000027_pro_14	rwhw01000019_pro_14	nbta01000002_pro_51	rses01000028_pro_14	rzmv01000036_pro_39	rqxy01000029_pro_14	rser01000035_pro_14	rrcr01000029_pro_14	rwhv01000027_pro_13	cp011279_pro_1418	cp010518_pro_1417	PAQ31011_00923	PBR20603_00081, PBR20603_01282	maos01000067_pro_14	PCA20602_04761	PCA31118_00363	B6_01501	PCE31106_03772, PCE31106_04179	PCE31107_01711	PCO31010_00904	PCO31110_01696, PCO31110_04769	PCO31111_00921, PCO31111_02416	kb944429_pro_65, kb944451_pro_91	PEP31012_00807, PEP31012_01972	cp011807_pro_2581	jtcr01000028_pro_50, jtcr01000035_pro_116	jtcs01000014_pro_203, jtcs01000023_pro_50	PFI31113_00109	PHO31112_02758, PHO31112_03401	PIN31009_03157	PIN31115_02738	PMO31116_00682, PMO31116_00742	cp013480_pro_1765	PNO31109_02431	cp011253_pro_2821	PPN31114_00023	cp006900_pro_1551
OG0000211	muhy01000003_pro_60	PAN31117_02083, PAN31117_04596	PAN31108_03029	cp011501_pro_3783	cp013481_pro_1221	cp014018_pro_4201	PAP18089_02134	rhsh01000018_pro_45	rhsg01000017_pro_45	rwhx01000010_pro_41	pyya01000005_pro_82	rzmt01000008_pro_81	rzmu01000011_pro_33	rwhw01000017_pro_3	nbta01000023_pro_534	rses01000009_pro_63	rzmv01000011_pro_33	rqxy01000008_pro_40	rser01000008_pro_81	rrcr01000012_pro_39	rwhv01000009_pro_60	cp011279_pro_2147	cp010518_pro_2146	PAQ31011_02808, PAQ31011_04623	PBR20603_02371	maos01000027_pro_67, maos01000072_pro_136	PCA20602_00123, PCA20602_04100	PCA31118_03682, PCA31118_04079	B6_00981	PCE31106_01173	PCE31107_01522	PCO31010_01358, PCO31010_02204	PCO31110_03513	PCO31111_01525	kb944452_pro_97	PEP31012_00219	cp011807_pro_3364	jtcr01000009_pro_240	jtcs01000022_pro_49	PFI31113_04020	PHO31112_01587	PIN31009_04152	PIN31115_04600	PMO31116_03275	cp013480_pro_4138	PNO31109_03131	cp011253_pro_3625	PPN31114_03230	cp006900_pro_805
OG0000212	NA	PAN31117_00797, PAN31117_02537	PAN31108_00256, PAN31108_03482	cp011501_pro_2785	cp013481_pro_2745	cp014018_pro_3152	PAP18089_02306	rhsh01000001_pro_56	rhsg01000001_pro_96	rwhx01000077_pro_14	pyya01000017_pro_95	rzmt01000014_pro_1	rzmu01000002_pro_261	rwhw01000147_pro_1	nbta01000023_pro_297	rses01000126_pro_2	rzmv01000092_pro_2	rqxy01000113_pro_1	rser01000014_pro_92	rrcr01000103_pro_1	rwhv01000011_pro_96	cp011279_pro_1149	cp010518_pro_1149	PAQ31011_00535, PAQ31011_03881	PBR20603_01035	maos01000001_pro_81, maos01000042_pro_9	PCA20602_01190, PCA20602_03132	PCA31118_00633	B6_00257	PCE31106_01627	PCE31107_01954	PCO31010_00593, PCO31010_03930	PCO31110_01382	PCO31111_02844	kb944435_pro_98	PEP31012_01671	cp011807_pro_2357	jtcr01000004_pro_231	jtcs01000003_pro_137	PFI31113_00358	PHO31112_03641	PIN31009_02747, PIN31009_02850	PIN31115_03484, PIN31115_03544	PMO31116_00395	cp013480_pro_2033	NA	NA	PPN31114_00414, PPN31114_01676	cp006900_pro_1816
OG0000213	NA	PAN31117_00913, PAN31117_04198	PAN31108_02762, PAN31108_03025	cp011501_pro_2877	cp013481_pro_2839	cp014018_pro_3244	PAP18089_02407	NA	NA	rwhx01000017_pro_2, rwhx01000088_pro_8	pyya01000063_pro_4	rzmt01000014_pro_95, rzmt01000066_pro_8	rzmu01000002_pro_32, rzmu01000002_pro_355	rwhw01000049_pro_32, rwhw01000121_pro_5	NA	rses01000013_pro_2, rses01000094_pro_8	rzmv01000014_pro_82, rzmv01000076_pro_8	rqxy01000012_pro_93, rqxy01000013_pro_32	rser01000002_pro_225, rser01000014_pro_1	rrcr01000002_pro_32, rrcr01000063_pro_3	rwhv01000011_pro_2, rwhv01000095_pro_4	cp011279_pro_1241	cp010518_pro_1241	NA	PBR20603_01132	NA	NA	NA	B6_03250	PCE31106_02782, PCE31106_04325	PCE31107_01180, PCE31107_02130	PCO31010_01155, PCO31010_04013	PCO31110_01483	PCO31111_02956	kb944435_pro_212	PEP31012_00549, PEP31012_02203	NA	jtcr01000051_pro_31	jtcs01000028_pro_15	PFI31113_00259	PHO31112_03158, PHO31112_05014	PIN31009_03837, PIN31009_03838	PIN31115_04056, PIN31115_04057	PMO31116_00626, PMO31116_02336	cp013480_pro_2652, cp013480_pro_2653	NA	cp011253_pro_3070	PPN31114_00991, PPN31114_00992, PPN31114_03975	cp006900_pro_1606
OG0000214	NA	PAN31117_01399	PAN31108_02026	NA	cp013481_pro_914	cp014018_pro_4510	PAP18089_01769	rhsh01000006_pro_153	rhsg01000004_pro_340	rwhx01000020_pro_64	pyya01000041_pro_24	rzmt01000004_pro_123	rzmu01000008_pro_123	rwhw01000025_pro_12	nbta01000004_pro_411	rses01000006_pro_12	rzmv01000009_pro_12	rqxy01000003_pro_123	rser01000009_pro_112	rrcr01000008_pro_12	rwhv01000053_pro_23	NA	NA	PAQ31011_02471	PBR20603_03330	maos01000020_pro_37, maos01000032_pro_11	PCA20602_00461	PCA31118_02374	B6_01442, B6_01443, B6_01795	PCE31106_02813	PCE31107_01211, PCE31107_02883	PCO31010_02545	PCO31110_03197	PCO31111_04374	kb944434_pro_148, kb944457_pro_148	PEP31012_00520, PEP31012_03104	cp011807_pro_3661, cp011807_pro_4227	NA	NA	PFI31113_02047	PHO31112_01951	PIN31009_05365	PIN31115_04960	PMO31116_01727	cp013480_pro_4458	PNO31109_01090	cp011253_pro_3938	PPN31114_03622	NA
OG0000215	NA	PAN31117_01409, PAN31117_02446	PAN31108_02016	cp011501_pro_4076	cp013481_pro_921	cp014018_pro_4504	PAP18089_01777	rhsh01000006_pro_147	rhsg01000004_pro_334	rwhx01000020_pro_70	pyya01000041_pro_30	rzmt01000004_pro_129	rzmu01000008_pro_129	rwhw01000025_pro_6	nbta01000004_pro_417	rses01000006_pro_6	rzmv01000009_pro_6	rqxy01000003_pro_129	rser01000009_pro_118	rrcr01000008_pro_6	rwhv01000053_pro_29	cp011279_pro_2440	cp010518_pro_2439	PAQ31011_02481, PAQ31011_03974	PBR20603_03320	maos01000032_pro_21, maos01000050_pro_147	PCA20602_00451, PCA20602_03401	PCA31118_02364	B6_03203	PCE31106_02823	PCE31107_01220	PCO31010_02535, PCO31010_04050	NA	NA	NA	PEP31012_00510	cp011807_pro_1248	jtcr01000009_pro_53, jtcr01000041_pro_8	jtcs01000035_pro_27, jtcs01000044_pro_14	PFI31113_01920, PFI31113_02037	PHO31112_01958	PIN31009_01503, PIN31009_05375	PIN31115_01685, PIN31115_04970	PMO31116_01717	cp013480_pro_3727, cp013480_pro_4450	PNO31109_01082	cp011253_pro_1317, cp011253_pro_3929	PPN31114_03612, PPN31114_04882, PPN31114_04898	NA
OG0000216	NA	PAN31117_01880	PAN31108_02692	cp011501_pro_2522	cp013481_pro_2485, cp013481_pro_2510	cp014018_pro_2889, cp014018_pro_2914	PAP18089_04078, PAP18089_04103	rhsh01000001_pro_293, rhsh01000001_pro_318	rhsg01000001_pro_333, rhsg01000001_pro_358	rwhx01000047_pro_15, rwhx01000072_pro_11	pyya01000015_pro_52, pyya01000015_pro_77	rzmt01000026_pro_15, rzmt01000038_pro_32	rzmu01000053_pro_10, rzmu01000062_pro_3	rwhw01000066_pro_9, rwhw01000075_pro_6	nbta01000006_pro_32, nbta01000006_pro_57	rses01000041_pro_32, rses01000064_pro_15	rzmv01000026_pro_45, rzmv01000060_pro_3	rqxy01000062_pro_10, rqxy01000063_pro_8	rser01000019_pro_55, rser01000043_pro_32	rrcr01000022_pro_15, rrcr01000067_pro_3	rwhv01000044_pro_11, rwhv01000066_pro_15	cp011279_pro_886	cp010518_pro_886	PAQ31011_00142	PBR20603_00995	maos01000052_pro_31	PCA20602_00860	PCA31118_00948	B6_03915	PCE31106_03797	PCE31107_02696	PCO31010_00139	PCO31110_04489	PCO31111_02184	kb944424_pro_132	PEP31012_02864	cp011807_pro_2107	NA	NA	PFI31113_00633	PHO31112_03776	PIN31009_02305	PIN31115_03979	PMO31116_00126	cp013480_pro_2519	PNO31109_00906	cp011253_pro_2260	PPN31114_00739, PPN31114_00915	NA
OG0000217	NA	PAN31117_02424, PAN31117_03365	PAN31108_01045	cp011501_pro_334	cp013481_pro_4720	cp014018_pro_730	PAP18089_00347	rhsh01000036_pro_26	rhsg01000005_pro_324	rwhx01000035_pro_44	pyya01000020_pro_80	rzmt01000002_pro_196	rzmu01000030_pro_4	rwhw01000004_pro_93	nbta01000001_pro_4	rses01000036_pro_44	rzmv01000019_pro_79	rqxy01000042_pro_38	rser01000018_pro_78	rrcr01000043_pro_4	rwhv01000036_pro_4	cp011279_pro_3400	cp010518_pro_3383	PAQ31011_01232, PAQ31011_04010	PBR20603_00738	maos01000002_pro_16	PCA20602_01484	PCA31118_01210	B6_04562	NA	PCE31107_00649, PCE31107_04513	PCO31010_01620, PCO31010_04084	PCO31110_00913	PCO31111_00717	kb944454_pro_925	PEP31012_01169	cp011807_pro_34	jtcr01000007_pro_3, jtcr01000027_pro_94	jtcs01000002_pro_32, jtcs01000018_pro_94	PFI31113_02982	PHO31112_00530	PIN31009_00151, PIN31009_01474	PIN31115_00358, PIN31115_01660	PMO31116_01550, PMO31116_04328	cp013480_pro_3756, cp013480_pro_65	PNO31109_01960	NA	PPN31114_02173, PPN31114_04852	cp006900_pro_3980
OG0000218	NA	PAN31117_02897	PAN31108_02437	cp011501_pro_1338	cp013481_pro_3715	cp014018_pro_1743	PAP18089_03526	rhsh01000013_pro_15	rhsg01000008_pro_156	rwhx01000040_pro_35	pyya01000013_pro_96	rzmt01000011_pro_16	rzmu01000013_pro_96	rwhw01000039_pro_35	nbta01000010_pro_237	rses01000034_pro_16	rzmv01000012_pro_96	rqxy01000014_pro_90	rser01000010_pro_94	rrcr01000051_pro_5	rwhv01000042_pro_16	cp011279_pro_4393	cp010518_pro_4378	PAQ31011_04248	PBR20603_02140	NA	PCA20602_03899, PCA20602_04902	PCA31118_03189	B6_02856	PCE31106_04457	PCE31107_02107	PCO31010_03334	PCO31110_04972	PCO31111_03744	kb944425_pro_81	PEP31012_03949	cp011807_pro_1052	jtcr01000017_pro_45	jtcs01000021_pro_45	PFI31113_02422	PHO31112_00712	PIN31009_01297	PIN31115_01484	PMO31116_02969, PMO31116_03819	cp013480_pro_3926	PNO31109_03302	cp011253_pro_1094	PPN31114_04682	cp006900_pro_2897, cp006900_pro_3063
OG0000219	NA	PAN31117_03203, PAN31117_05301	PAN31108_03590, PAN31108_03836	cp011501_pro_4635	cp013481_pro_282	cp014018_pro_383	PAP18089_03709	rhsh01000027_pro_22	rhsg01000011_pro_22	rwhx01000050_pro_20	pyya01000042_pro_14	rzmt01000041_pro_20	rzmu01000048_pro_20	rwhw01000061_pro_20	nbta01000009_pro_159	rses01000057_pro_20	rzmv01000048_pro_20	rqxy01000052_pro_20	rser01000054_pro_20	rrcr01000052_pro_20	rwhv01000055_pro_20	cp011279_pro_2998	cp010518_pro_3000	PAQ31011_02998, PAQ31011_04959	PBR20603_03968	maos01000028_pro_247, maos01000055_pro_20	PCA20602_02892, PCA20602_03761	PCA31118_04169, PCA31118_04737	B6_00412	PCE31106_02181	PCE31107_03495	PCO31010_02640, PCO31010_05296	PCO31110_04334	PCO31111_04150	kb944455_pro_18	PEP31012_03164	cp011807_pro_1413, cp011807_pro_4147	jtcr01000045_pro_44	jtcs01000039_pro_22	PFI31113_04355	PHO31112_03094	PIN31009_05515	PIN31115_05492	PMO31116_03778	cp013480_pro_4946	PNO31109_04229	cp011253_pro_1488, cp011253_pro_4422	PPN31114_05241	cp006900_pro_22
OG0000220	NA	PAN31117_04531	PAN31108_03098, PAN31108_05152	cp011501_pro_3842	cp013481_pro_1161	cp014018_pro_4264	PAP18089_02071	rhsh01000016_pro_12	rhsg01000004_pro_94	rwhx01000043_pro_19	pyya01000005_pro_19	rzmt01000008_pro_19	rzmu01000034_pro_30	rwhw01000036_pro_26	nbta01000023_pro_596	rses01000047_pro_19	rzmv01000044_pro_24	rqxy01000046_pro_19	rser01000008_pro_19	rrcr01000046_pro_19	rwhv01000050_pro_19	cp011279_pro_2206	cp010518_pro_2205	PAQ31011_02741	PBR20603_02434	NA	PCA20602_00193	PCA31118_04143, PCA31118_05380	B6_00924	PCE31106_01117	PCE31107_01462	PCO31010_02272	PCO31110_03442	PCO31111_01591	kb944452_pro_168	PEP31012_00279	cp011807_pro_3425	jtcr01000009_pro_182	jtcs01000022_pro_107	PFI31113_04084	PHO31112_01515	PIN31009_04086	PIN31115_04388	PMO31116_03217	cp013480_pro_4197	PNO31109_03516	cp011253_pro_3686	PPN31114_03294	cp006900_pro_753
OG0000221	muhy01000002_pro_93	PAN31117_00385	PAN31108_03989	cp011501_pro_2128, cp011501_pro_814	cp013481_pro_4227	cp014018_pro_1226	PAP18089_00849	rhsh01000002_pro_234	rhsg01000003_pro_235	rwhx01000015_pro_105	pyya01000007_pro_62	rzmt01000029_pro_66	rzmu01000018_pro_105	rwhw01000009_pro_105	nbta01000008_pro_417, nbta01000022_pro_100	rses01000015_pro_104	rzmv01000018_pro_105	rqxy01000017_pro_105	rser01000016_pro_105	rrcr01000025_pro_66	rwhv01000013_pro_104	cp011279_pro_3882, cp011279_pro_491	cp010518_pro_3865, cp010518_pro_491	PAQ31011_01785	PBR20603_00231	maos01000001_pro_336	PCA20602_02043	PCA31118_01811	B6_00742	PCE31106_00553	PCE31107_00672, PCE31107_02892	PCO31010_03552	PCO31110_00412, PCO31110_01628	PCO31111_00232, PCO31111_03510	kb944454_pro_414	PEP31012_01145	cp011807_pro_562	jtcr01000031_pro_63	jtcs01000038_pro_28	PFI31113_01579	PHO31112_00016	PIN31009_00734	PIN31115_00910	PMO31116_01032	cp013480_pro_3000, cp013480_pro_633	PNO31109_00235	cp011253_pro_589, cp011521_pro_12	PPN31114_02732	cp006900_pro_3510
OG0000222	NA	PAN31117_00173	PAN31108_00723, PAN31108_03205	cp011501_pro_616	cp013481_pro_4431	cp014018_pro_1023	PAP18089_00641	rhsh01000002_pro_29	rhsg01000003_pro_29	rwhx01000004_pro_2	pyya01000002_pro_213	rzmt01000003_pro_99	rzmu01000003_pro_99	rwhw01000003_pro_22	nbta01000008_pro_211	rses01000003_pro_74	rzmv01000001_pro_211	rqxy01000002_pro_74	rser01000001_pro_99	rrcr01000001_pro_99	rwhv01000001_pro_10	cp011279_pro_3684	cp010518_pro_3667	PAQ31011_01566	PBR20603_00440	maos01000043_pro_42, maos01000061_pro_47	PCA20602_01832	PCA31118_01549, PCA31118_04502	B6_01405	PCE31106_00366	PCE31107_00478	PCO31010_01973	PCO31110_00049, PCO31110_00616	PCO31111_00437, PCO31111_05003	kb944454_pro_55, kb944454_pro_618	PEP31012_01338	cp011807_pro_351	jtcr01000029_pro_13	jtcs01000006_pro_25	PFI31113_01788	PHO31112_00222	PIN31009_00519	PIN31115_00697	PMO31116_01229	cp013480_pro_403	PNO31109_00443, PNO31109_02271	cp011253_pro_370	PPN31114_02522	cp006900_pro_3694
OG0000223	NA	PAN31117_00459	PAN31108_04249	cp011501_pro_861	cp013481_pro_4179	cp014018_pro_1273	PAP18089_00897	rhsh01000002_pro_281	rhsg01000003_pro_282	rwhx01000029_pro_16	pyya01000007_pro_15	rzmt01000030_pro_47	rzmu01000025_pro_48	rwhw01000021_pro_15	nbta01000008_pro_463	rses01000031_pro_15	rzmv01000031_pro_48	rqxy01000030_pro_15	rser01000058_pro_13	rrcr01000030_pro_48	rwhv01000025_pro_48	cp011279_pro_3929	cp010518_pro_3912	PAQ31011_01864	PBR20603_00190	maos01000001_pro_238	PCA20602_04955	PCA31118_01889	B6_00697, B6_02360	PCE31106_00599, PCE31106_00874	PCE31107_00711, PCE31107_00968	PCO31010_03621	PCO31110_00040, PCO31110_00360	PCO31111_00195, PCO31111_04972	kb944454_pro_362, kb944454_pro_46	PEP31012_01113	cp011807_pro_619	jtcr01000011_pro_28	jtcs01000008_pro_28	PFI31113_01522	PHO31112_02261	PIN31009_00838	PIN31115_01008	PMO31116_00995	cp013480_pro_731	NA	NA	PPN31114_02810	cp006900_pro_3464
OG0000224	NA	PAN31117_00557, PAN31117_02420	NA	cp011501_pro_945	cp013481_pro_4092	cp014018_pro_1359	PAP18089_00986	rhsh01000002_pro_365	rhsg01000003_pro_366	rwhx01000009_pro_43	pyya01000024_pro_70	rzmt01000005_pro_69	rzmu01000005_pro_69	rwhw01000008_pro_14	nbta01000021_pro_72	rses01000014_pro_20	rzmv01000005_pro_100	rqxy01000005_pro_43	rser01000011_pro_69	rrcr01000010_pro_69	rwhv01000008_pro_68	cp011279_pro_4013	cp010518_pro_3996	PAQ31011_01961, PAQ31011_04014	PBR20603_00101	maos01000001_pro_141	PCA20602_03088	PCA31118_02006	B6_03998	PCE31106_00689	PCE31107_00794	PCO31010_03711	PCO31110_00246	PCO31111_00092	kb944454_pro_246	PEP31012_01046	cp011807_pro_714	jtcr01000023_pro_24	jtcs01000008_pro_108	PFI31113_01428	PHO31112_02135	PIN31009_00944, PIN31009_02379	PIN31115_01138, PIN31115_03921	PMO31116_00915	cp013480_pro_2442, cp013480_pro_841	PNO31109_00108	cp011253_pro_1306, cp011253_pro_758	PPN31114_02920	cp006900_pro_3390
OG0000225	NA	PAN31117_00645	PAN31108_00132, PAN31108_03215	cp011501_pro_2618	cp013481_pro_2613	cp014018_pro_3020	PAP18089_04700	rhsh01000001_pro_187	rhsg01000001_pro_227	rwhx01000002_pro_96	pyya01000004_pro_98	rzmt01000006_pro_31	rzmu01000002_pro_130	rwhw01000001_pro_132	nbta01000023_pro_166	rses01000004_pro_26	rzmv01000003_pro_130	rqxy01000016_pro_58	rser01000002_pro_130	rrcr01000002_pro_130	rwhv01000004_pro_94	cp011279_pro_982	cp010518_pro_982	PAQ31011_00375	NA	maos01000039_pro_178, maos01000044_pro_36	PCA20602_01025	PCA31118_00773	B6_00153, B6_03233	PCE31106_01593, PCE31106_04493	PCE31107_01920, PCE31107_02046	PCO31010_00385	NA	PCO31111_02879	kb944435_pro_133	PEP31012_03892	cp011807_pro_2228	jtcr01000004_pro_116	jtcs01000003_pro_22	PFI31113_00484	PHO31112_03123, PHO31112_03606	PIN31009_02629	PIN31115_02837, PIN31115_03673	PMO31116_00290	cp013480_pro_2207	PNO31109_00835	cp011253_pro_2442, cp011253_pro_2617	PPN31114_00378, PPN31114_00587	cp006900_pro_1905
OG0000226	NA	PAN31117_00683	NA	cp011501_pro_1552, cp011501_pro_2644	cp013481_pro_2640, cp013481_pro_3458	cp014018_pro_1981, cp014018_pro_3047	PAP18089_04727, PAP18089_04788	rhsh01000001_pro_160, rhsh01000012_pro_28	rhsg01000001_pro_200, rhsg01000014_pro_28	rwhx01000002_pro_123, rwhx01000056_pro_1	pyya01000004_pro_125, pyya01000011_pro_28	rzmt01000006_pro_58, rzmt01000040_pro_27	rzmu01000002_pro_157, rzmu01000010_pro_28	rwhw01000001_pro_105, rwhw01000059_pro_1	nbta01000014_pro_196, nbta01000023_pro_193	rses01000004_pro_53, rses01000032_pro_27	rzmv01000003_pro_103, rzmv01000030_pro_27	rqxy01000007_pro_28	rser01000002_pro_103, rser01000031_pro_26	rrcr01000011_pro_28	rwhv01000004_pro_121, rwhv01000034_pro_29	cp011279_pro_1008, cp011279_pro_4607	cp010518_pro_1008, cp010518_pro_4592	PAQ31011_00412	PBR20603_03154	maos01000034_pro_77	PCA20602_01058	PCA31118_00738	B6_00175	NA	PCE31107_02028	PCO31010_00422	NA	NA	NA	PEP31012_03870	cp011807_pro_2255	jtcr01000002_pro_78, jtcr01000004_pro_144	jtcs01000003_pro_50, jtcs01000013_pro_78	PFI31113_00453, PFI31113_02654	NA	PIN31009_02677	PIN31115_03617	PMO31116_00315	cp013480_pro_2155	NA	cp011253_pro_2477	PPN31114_00542	cp006900_pro_1880
OG0000227	NA	PAN31117_01676, PAN31117_03603	PAN31108_00121, PAN31108_01226	cp011501_pro_3526	cp013481_pro_1463	cp014018_pro_3958	PAP18089_02804	rhsh01000003_pro_205	rhsg01000006_pro_204	rwhx01000031_pro_57	pyya01000018_pro_58	rzmt01000007_pro_79	rzmu01000016_pro_57	rwhw01000020_pro_57	nbta01000013_pro_80	rses01000029_pro_57	rzmv01000007_pro_89	rqxy01000015_pro_57	rser01000024_pro_31	rrcr01000031_pro_57	rwhv01000012_pro_56	cp011279_pro_1890	cp010518_pro_1889	PAQ31011_00360, PAQ31011_03699	PBR20603_02761, PBR20603_04233	maos01000039_pro_164, maos01000045_pro_26	PCA20602_02242	PCA31118_00784, PCA31118_04413	NA	NA	NA	PCO31010_00373, PCO31010_04284	PCO31110_03745, PCO31110_03936	NA	kb944431_pro_137, kb944444_pro_103	NA	cp011807_pro_3142	jtcr01000004_pro_113, jtcr01000010_pro_17, jtcr01000024_pro_11	jtcs01000003_pro_19, jtcs01000025_pro_147, jtcs01000037_pro_5	PFI31113_00488, PFI31113_04576, PFI31113_04941	PHO31112_04146, PHO31112_04543	PIN31009_02612, PIN31009_04360	PIN31115_03326, PIN31115_03690	NA	cp013480_pro_1244, cp013480_pro_2224	PNO31109_01869	cp011253_pro_2427, cp011253_pro_3400	PPN31114_00600, PPN31114_04413	NA
OG0000228	NA	PAN31117_01731	PAN31108_00061	cp011501_pro_1982	cp013481_pro_2052	cp014018_pro_2433	PAP18089_01501	rhsh01000004_pro_202	rhsg01000002_pro_313	rwhx01000001_pro_146	pyya01000001_pro_364	rzmt01000001_pro_122	rzmu01000001_pro_295	rwhw01000002_pro_127	nbta01000022_pro_322	rses01000001_pro_211	rzmv01000002_pro_126	rqxy01000001_pro_68	rser01000003_pro_33	rrcr01000003_pro_97	rwhv01000002_pro_67	cp011279_pro_345	cp010518_pro_345	PAQ31011_00291	PBR20603_01866	maos01000039_pro_92	PCA20602_00912, PCA20602_00947	PCA31118_00828	B6_03112	PCE31106_01733, PCE31106_02367	PCE31107_02289	PCO31010_00304	PCO31110_01846, PCO31110_02557	PCO31111_01026, PCO31111_01959	kb944423_pro_354, kb944426_pro_45, kb944454_pro_687	PEP31012_02498	cp011807_pro_2180	jtcr01000012_pro_37	jtcs01000007_pro_64	PFI31113_01205	PHO31112_00289, PHO31112_01088	PIN31009_02126	PIN31115_02316	PMO31116_00904	cp013480_pro_3150	PNO31109_01002	cp011253_pro_2372	PPN31114_01409	cp006900_pro_3374
OG0000229	NA	PAN31117_01802, PAN31117_01830	PAN31108_00090	cp011501_pro_3153	cp013481_pro_3087	cp014018_pro_3479	PAP18089_04206	rhsh01000017_pro_32	rhsg01000016_pro_31	rwhx01000013_pro_31	pyya01000009_pro_64	rzmt01000015_pro_32	rzmu01000015_pro_32	rwhw01000006_pro_31	nbta01000012_pro_57	rses01000007_pro_50	rzmv01000008_pro_65	rqxy01000006_pro_50	rser01000013_pro_58	rrcr01000004_pro_58	rwhv01000003_pro_83	cp011279_pro_1517	cp010518_pro_1516	PAQ31011_00188, PAQ31011_01025	NA	maos01000050_pro_64	PCA20602_03345, PCA20602_04373	PCA31118_00248, PCA31118_00817, PCA31118_03378	B6_00532, B6_01672	PCE31106_03387	PCE31107_04045	PCO31010_01029	NA	NA	NA	NA	NA	jtcr01000020_pro_101	jtcs01000014_pro_101	PFI31113_04959	NA	PIN31009_02429, PIN31009_03472	PIN31115_02892, PIN31115_03871	NA	cp013480_pro_1677, cp013480_pro_2393	NA	cp011253_pro_2936, cp011253_pro_3155	PPN31114_00729, PPN31114_00784, PPN31114_00798	cp006900_pro_1317
OG0000230	NA	PAN31117_02732	PAN31108_01482	cp011501_pro_2074	cp013481_pro_2172	cp014018_pro_2527	PAP18089_01598	rhsh01000004_pro_296	rhsg01000002_pro_407	rwhx01000001_pro_52	pyya01000001_pro_458	rzmt01000001_pro_216	rzmu01000001_pro_389	rwhw01000054_pro_19	nbta01000022_pro_228	rses01000026_pro_3	rzmv01000002_pro_219	rqxy01000001_pro_162	rser01000003_pro_126	rrcr01000003_pro_3	rwhv01000035_pro_52	cp011279_pro_436	cp010518_pro_436	PAQ31011_03429	PBR20603_01962	maos01000070_pro_6	PCA20602_02668	PCA31118_03017	B6_00365, B6_00461	PCE31106_04055	PCE31107_04407	PCO31010_03058	PCO31110_02653	PCO31111_04827	kb944423_pro_260	PEP31012_04270	cp011807_pro_1764	jtcr01000040_pro_55	jtcs01000017_pro_148	PFI31113_01302	PHO31112_01182	PIN31009_02225	PIN31115_02416	PMO31116_04401	cp013480_pro_3053	PNO31109_03688	cp011253_pro_1872	PPN31114_01308	cp006900_pro_2402
OG0000231	muhy01000003_pro_71	PAN31117_04565	PAN31108_03060, PAN31108_03114	cp011501_pro_3815	cp013481_pro_1188, cp013482_pro_2, cp013482_pro_71	cp014018_pro_4234	PAP18089_02102	rhsh01000016_pro_42	rhsg01000004_pro_64	rwhx01000010_pro_8	pyya01000005_pro_49	rzmt01000008_pro_49	rzmu01000011_pro_1	rwhw01000031_pro_8	nbta01000023_pro_566	rses01000009_pro_95	rzmv01000011_pro_1	rqxy01000008_pro_8	rser01000008_pro_49	rrcr01000012_pro_7	rwhv01000009_pro_92	cp011279_pro_2179	cp010518_pro_2178	PAQ31011_02778	PBR20603_02403	maos01000020_pro_40, maos01000027_pro_37	PCA20602_00154	PCA31118_04110	B6_00950	PCE31106_01142	PCE31107_01490, PCE31107_02882	PCO31010_02234	PCO31110_03472	PCO31111_01565	kb944452_pro_138	PEP31012_00250	cp011807_pro_3395	jtcr01000009_pro_210	jtcs01000022_pro_79	PFI31113_04052	PHO31112_01546, PHO31112_03926	PIN31009_04119	PIN31115_04568	PMO31116_03243	cp013480_pro_4167	PNO31109_03094	cp011253_pro_3654	PPN31114_03262	cp006900_pro_776
OG0000232	NA	PAN31117_00163	PAN31108_00735	cp011501_pro_608	cp013481_pro_4439	cp014018_pro_1015	PAP18089_00633	rhsh01000002_pro_21	rhsg01000003_pro_21	rwhx01000004_pro_10	pyya01000002_pro_205	rzmt01000003_pro_107	rzmu01000003_pro_107	rwhw01000003_pro_30	nbta01000008_pro_203	rses01000003_pro_66	rzmv01000001_pro_203	rqxy01000002_pro_66	rser01000001_pro_107	rrcr01000001_pro_107	rwhv01000001_pro_18	cp011279_pro_3676	cp010518_pro_3659	PAQ31011_01555	PBR20603_00083, PBR20603_00450	maos01000043_pro_54	PCA20602_01820	PCA31118_01540	B6_01411	PCE31106_00356, PCE31106_03774	PCE31107_00469	PCO31010_01961	PCO31110_00626, PCO31110_04767	PCO31111_00446, PCO31111_02418	kb944429_pro_67, kb944454_pro_628	PEP31012_00805, PEP31012_01348	cp011807_pro_342	jtcr01000029_pro_1	jtcs01000006_pro_37	PFI31113_01800	PHO31112_00233, PHO31112_02760	PIN31009_00509	PIN31115_00688	PMO31116_01238	cp013480_pro_394	PNO31109_00450	cp011253_pro_359	PPN31114_02512	cp006900_pro_3702
OG0000233	NA	PAN31117_00407	NA	cp011501_pro_817	cp013481_pro_4224	cp014018_pro_1229	PAP18089_00852	rhsh01000002_pro_237	rhsg01000003_pro_238	rwhx01000029_pro_60	pyya01000007_pro_59	rzmt01000030_pro_3	rzmu01000025_pro_4	rwhw01000021_pro_59	nbta01000008_pro_420	rses01000031_pro_59	rzmv01000031_pro_4	rqxy01000030_pro_59	rser01000047_pro_31	rrcr01000030_pro_4	rwhv01000025_pro_4	cp011279_pro_3885	cp010518_pro_3868	PAQ31011_01807	PBR20603_00225, PBR20603_04000, PBR20603_04465	maos01000001_pro_290, maos01000083_pro_33	PCA20602_04998	PCA31118_01838	B6_00733	PCE31106_00562	PCE31107_00675	PCO31010_03572	PCO31110_00403	PCO31111_00227	kb944454_pro_405	PEP31012_00134, PEP31012_00435	cp011807_pro_577	jtcr01000013_pro_64, jtcr01000031_pro_75	jtcs01000025_pro_209, jtcs01000038_pro_16	PFI31113_01566, PFI31113_03600	PHO31112_02308	PIN31009_00770	PIN31115_00945	PMO31116_01026, PMO31116_03805	cp013480_pro_669	PNO31109_00223, PNO31109_02980	cp011253_pro_606	PPN31114_02761	cp006900_pro_3495
OG0000234	NA	PAN31117_00682	NA	cp011501_pro_1546, cp011501_pro_2643	cp013481_pro_2639, cp013481_pro_3465	cp014018_pro_1974, cp014018_pro_3046	PAP18089_04726, PAP18089_04795	rhsh01000001_pro_161, rhsh01000012_pro_35	rhsg01000001_pro_201, rhsg01000014_pro_35	rwhx01000002_pro_122, rwhx01000087_pro_7	pyya01000004_pro_124, pyya01000011_pro_35	rzmt01000006_pro_57, rzmt01000040_pro_34	rzmu01000002_pro_156, rzmu01000010_pro_35	rwhw01000001_pro_106, rwhw01000060_pro_7	nbta01000014_pro_189, nbta01000023_pro_192	rses01000004_pro_52, rses01000032_pro_34	rzmv01000003_pro_104, rzmv01000030_pro_34	rqxy01000007_pro_35	rser01000002_pro_104, rser01000031_pro_33	rrcr01000011_pro_35	rwhv01000004_pro_120, rwhv01000034_pro_35	cp011279_pro_1007, cp011279_pro_4601	cp010518_pro_1007, cp010518_pro_4586	PAQ31011_00411	PBR20603_03146	maos01000034_pro_78	PCA20602_01057	PCA31118_00739	B6_00174	NA	PCE31107_02029	PCO31010_00421	NA	NA	NA	PEP31012_03871	cp011807_pro_2254	jtcr01000002_pro_72, jtcr01000004_pro_143	jtcs01000003_pro_49, jtcs01000013_pro_72	PFI31113_00454, PFI31113_02647	NA	PIN31009_02676	PIN31115_03618	PMO31116_00314	cp013480_pro_2156	NA	cp011253_pro_2476	PPN31114_00543	cp006900_pro_1881
OG0000235	NA	PAN31117_00798, PAN31117_02536	PAN31108_00257, PAN31108_03481	cp011501_pro_2786	cp013481_pro_2746	cp014018_pro_3153	PAP18089_02307	rhsh01000001_pro_55	rhsg01000001_pro_95	rwhx01000077_pro_13	pyya01000017_pro_94	rzmt01000014_pro_2	rzmu01000002_pro_262	rwhw01000147_pro_2	nbta01000023_pro_298	rses01000126_pro_1	rzmv01000092_pro_1	rqxy01000113_pro_2	rser01000014_pro_91	rrcr01000103_pro_2	rwhv01000011_pro_95	cp011279_pro_1150	cp010518_pro_1150	PAQ31011_00254, PAQ31011_00536, PAQ31011_03882	PBR20603_01036	maos01000001_pro_82, maos01000042_pro_8	PCA20602_01191, PCA20602_03131	PCA31118_00632	B6_00258	PCE31106_01626	PCE31107_01953	PCO31010_00594, PCO31010_03931	PCO31110_01383	PCO31111_02845	kb944435_pro_99	PEP31012_01672	cp011807_pro_2358	NA	NA	PFI31113_00357	PHO31112_03640	PIN31009_02746, PIN31009_02851	PIN31115_03483, PIN31115_03545	PMO31116_00396	cp013480_pro_2032, cp013480_pro_2090	NA	NA	PPN31114_00413, PPN31114_01675	NA
OG0000236	NA	PAN31117_02443	PAN31108_03256	cp011501_pro_292	cp013481_pro_455, cp013481_pro_4762	cp014018_pro_687	PAP18089_00303	rhsh01000011_pro_43	rhsg01000005_pro_282	rwhx01000008_pro_73	pyya01000003_pro_191	rzmt01000002_pro_154	rzmu01000004_pro_38	rwhw01000004_pro_51	nbta01000009_pro_479	rses01000005_pro_100	rzmv01000010_pro_38	rqxy01000004_pro_73	rser01000021_pro_39	rrcr01000009_pro_73	rwhv01000007_pro_72	cp011279_pro_3358	cp010518_pro_3341	PAQ31011_01981, PAQ31011_03977	NA	maos01000001_pro_121, maos01000026_pro_83, maos01000050_pro_150	PCA20602_03107, PCA20602_03404	PCA31118_03987	NA	PCE31106_02911	NA	PCO31010_03726, PCO31010_04053	PCO31110_04148	NA	NA	NA	cp011807_pro_1245	jtcr01000009_pro_50, jtcr01000027_pro_59	jtcs01000018_pro_59, jtcs01000044_pro_17	PFI31113_01923, PFI31113_03023	NA	PIN31009_01500, PIN31009_02414, PIN31009_02525	PIN31115_01682, PIN31115_03775, PIN31115_03886	NA	cp013480_pro_2308, cp013480_pro_2408, cp013480_pro_3730	NA	cp011253_pro_1314, cp011253_pro_661	PPN31114_00808, PPN31114_04328, PPN31114_04879	cp006900_pro_2919
OG0000237	NA	PAN31117_05209	PAN31108_03168	cp011501_pro_3273	cp013481_pro_3207	cp014018_pro_3598	PAP18089_04330	rhsh01000015_pro_62	rhsg01000015_pro_62	rwhx01000012_pro_24	pyya01000016_pro_25	rzmt01000013_pro_24	rzmu01000038_pro_22	rwhw01000045_pro_18	nbta01000017_pro_63	rses01000017_pro_18	rzmv01000043_pro_18	rqxy01000045_pro_18	rser01000015_pro_22	rrcr01000033_pro_24	rwhv01000046_pro_21	cp011279_pro_1637	cp010518_pro_1636	PAQ31011_04864	PBR20603_03616, PBR20603_04326	maos01000061_pro_87	NA	NA	B6_00510	PCE31106_03563, PCE31106_03564, PCE31106_04602	PCE31107_03706	PCO31010_01192	PCO31110_01829, PCO31110_02072, PCO31110_02128	NA	kb944426_pro_216, kb944433_pro_7	PEP31012_02250	NA	jtcr01000013_pro_21, jtcr01000013_pro_62	jtcs01000025_pro_211, jtcs01000025_pro_252	NA	PHO31112_04224, PHO31112_04255	PIN31009_03947	PIN31115_04249	PMO31116_02691	cp013480_pro_1522, cp013480_pro_4336	PNO31109_03573	NA	PPN31114_03439, PPN31114_04130	cp006900_pro_1335
OG0000238	muhy01000001_pro_49	PAN31117_01657	PAN31108_01799	cp011501_pro_3853	cp013481_pro_1150	cp014018_pro_4275	PAP18089_02060	rhsh01000016_pro_1, rhsh01000022_pro_85	rhsg01000004_pro_105	rwhx01000043_pro_8	pyya01000005_pro_8	rzmt01000008_pro_8	rzmu01000034_pro_41	rwhw01000036_pro_15	nbta01000023_pro_607	rses01000047_pro_8	rzmv01000044_pro_34	rqxy01000046_pro_8	rser01000008_pro_8	rrcr01000046_pro_8	rwhv01000050_pro_8	cp011279_pro_2217	cp010518_pro_2216	PAQ31011_02730	PBR20603_02445	maos01000029_pro_8	PCA20602_00204	PCA31118_02123	B6_00457, B6_00912, B6_03541	PCE31106_01106, PCE31106_03212	PCE31107_01451	PCO31010_02283	PCO31110_03431	PCO31111_01602	kb944452_pro_179	PEP31012_00290, PEP31012_04343	cp011807_pro_3436	jtcr01000009_pro_171	jtcs01000022_pro_118	PFI31113_04827	PHO31112_01504	PIN31009_04075	PIN31115_04377	PMO31116_03206	cp013480_pro_4208	PNO31109_03505	cp011253_pro_3697	PPN31114_03305	cp006900_pro_742
OG0000239	muhy01000001_pro_216	PAN31117_02369	PAN31108_03108, PAN31108_04486	cp011501_pro_1510	cp013481_pro_3559	cp014018_pro_1906	PAP18089_04833	rhsh01000023_pro_61	rhsg01000019_pro_61	rwhx01000018_pro_39	pyya01000011_pro_71	rzmt01000023_pro_31	rzmu01000010_pro_70	rwhw01000022_pro_39	nbta01000014_pro_153	rses01000027_pro_39	rzmv01000033_pro_13	rqxy01000007_pro_70	rser01000036_pro_12	rrcr01000011_pro_70	rwhv01000023_pro_38	cp011279_pro_4565	cp010518_pro_4550	PAQ31011_04045	PBR20603_03128	maos01000036_pro_51, maos01000041_pro_8	PCA20602_03479	PCA31118_03460	B6_03875	PCE31106_03761	PCE31107_04216	PCO31010_03171	PCO31110_04690	PCO31111_02469	kb944429_pro_89	PEP31012_02825	cp011807_pro_1214	jtcr01000028_pro_27	jtcs01000023_pro_27	PFI31113_02587	PHO31112_02800	PIN31009_01456, PIN31009_03487	PIN31115_01643, PIN31115_02877	PMO31116_04271	cp013480_pro_3774	PNO31109_03010	cp011253_pro_1262	PPN31114_04844	cp006900_pro_2924
OG0000240	muhy01000003_pro_34	PAN31117_01460	PAN31108_01966	cp011501_pro_4029	cp013481_pro_969	cp014018_pro_4456	PAP18089_01828	rhsh01000006_pro_99	rhsg01000004_pro_286	rwhx01000007_pro_44	pyya01000008_pro_100	rzmt01000004_pro_177	rzmu01000020_pro_43	rwhw01000002_pro_218, rwhw01000011_pro_39	nbta01000010_pro_140, nbta01000018_pro_22	rses01000019_pro_39	rzmv01000020_pro_44	rqxy01000025_pro_48	rser01000005_pro_42	rrcr01000023_pro_48	rwhv01000016_pro_38	cp011279_pro_2393	cp010518_pro_2392	PAQ31011_02532	PBR20603_03269, PBR20603_04006	maos01000032_pro_69	PCA20602_00401	PCA31118_02314	B6_00624	PCE31106_02869, PCE31106_03776	PCE31107_01266	PCO31010_02484	PCO31110_03247	PCO31111_04322	kb944457_pro_99	PEP31012_00463	cp011807_pro_3605	jtcr01000013_pro_59, jtcr01000056_pro_36	jtcs01000005_pro_36, jtcs01000025_pro_214	PFI31113_01987, PFI31113_03594	PHO31112_02007	PIN31009_05425	PIN31115_05020	PMO31116_01668	cp013480_pro_4404	PNO31109_01032	cp011253_pro_3881	PPN31114_03562	cp006900_pro_579
OG0000241	NA	PAN31117_00026	PAN31108_00859, PAN31108_00860	cp011501_pro_471	cp013481_pro_4577	cp014018_pro_876	PAP18089_00493	rhsh01000005_pro_126	rhsg01000007_pro_127	rwhx01000004_pro_147	pyya01000002_pro_67	rzmt01000003_pro_244	rzmu01000003_pro_244	rwhw01000003_pro_167	nbta01000008_pro_65	rses01000010_pro_48	rzmv01000001_pro_66	rqxy01000010_pro_48	rser01000001_pro_242	rrcr01000001_pro_243	rwhv01000001_pro_154	cp011279_pro_3538	cp010518_pro_3521	PAQ31011_01395	PBR20603_00584, PBR20603_04536	maos01000040_pro_53	PCA20602_01678	PCA31118_01403, PCA31118_05144	B6_02238	PCE31106_00208	PCE31107_00324	PCO31010_01817	PCO31110_00758	PCO31111_00566	kb944454_pro_772	PEP31012_01470	cp011807_pro_218	jtcr01000018_pro_61	jtcs01000016_pro_61	PFI31113_02830	PHO31112_00377	PIN31009_00344	PIN31115_00521	PMO31116_01378	cp013480_pro_229	PNO31109_00578	cp011253_pro_204, cp011253_pro_676	PPN31114_02361	cp006900_pro_3831
OG0000242	NA	PAN31117_00490, PAN31117_05119, PAN31117_05275	PAN31108_04225	cp011501_pro_884	cp013481_pro_4155	cp014018_pro_1297	PAP18089_00922	rhsh01000002_pro_303, rhsh01000016_pro_100	rhsg01000003_pro_304, rhsg01000004_pro_6	rwhx01000009_pro_105	pyya01000024_pro_8	rzmt01000005_pro_7	rzmu01000005_pro_7	rwhw01000008_pro_76	nbta01000021_pro_10	rses01000014_pro_82	rzmv01000005_pro_161	rqxy01000005_pro_105	rser01000011_pro_8	rrcr01000010_pro_7	rwhv01000008_pro_7	cp011279_pro_3952	cp010518_pro_3935	PAQ31011_01886	PBR20603_00158	maos01000001_pro_205	PCA20602_03026	PCA31118_01941, PCA31118_05193	B6_00678	PCE31106_00623	PCE31107_00730	PCO31010_03155, PCO31010_03643	PCO31110_00318	PCO31111_00159	kb944454_pro_319	PEP31012_01094	cp011807_pro_648	jtcr01000011_pro_51	jtcs01000008_pro_51	PFI31113_01496	PHO31112_02212	PIN31009_00877, PIN31009_05280, PIN31009_05457	PIN31115_01070	PMO31116_00975	cp013480_pro_772	PNO31109_00166	cp011253_pro_696	PPN31114_02852	NA
OG0000243	NA	PAN31117_00652	PAN31108_00139, PAN31108_04714	cp011501_pro_2625	cp013481_pro_2620	cp014018_pro_3027	PAP18089_04707	rhsh01000001_pro_180	rhsg01000001_pro_220	rwhx01000002_pro_103	pyya01000004_pro_105	rzmt01000006_pro_38	rzmu01000002_pro_137	rwhw01000001_pro_125	nbta01000023_pro_173	rses01000004_pro_33	rzmv01000003_pro_123	rqxy01000016_pro_51	rser01000002_pro_123	rrcr01000002_pro_137	rwhv01000004_pro_101	cp011279_pro_989	cp010518_pro_989	PAQ31011_00382	NA	maos01000039_pro_185	PCA20602_01032	PCA31118_00766	B6_00160	NA	NA	PCO31010_00392	PCO31110_01275, PCO31110_01833	PCO31111_01013, PCO31111_02749	kb944426_pro_32, kb944435_pro_1, kb944443_pro_1, kb944454_pro_1	PEP31012_03885	cp011807_pro_2235	jtcr01000004_pro_123	jtcs01000003_pro_29	PFI31113_00477	PHO31112_03752, PHO31112_03982	PIN31009_02642	PIN31115_03660	NA	cp013480_pro_2194	PNO31109_00826	cp011253_pro_1282, cp011253_pro_1294, cp011253_pro_2449	PPN31114_00579	cp006900_pro_1899
OG0000244	NA	PAN31117_00799, PAN31117_02535	PAN31108_00258, PAN31108_03480	NA	cp013481_pro_2747	cp014018_pro_3154	PAP18089_02308	rhsh01000001_pro_54	rhsg01000001_pro_94	rwhx01000077_pro_12	pyya01000017_pro_93	rzmt01000014_pro_3	rzmu01000002_pro_263	rwhw01000028_pro_50	nbta01000023_pro_299	rses01000013_pro_94	rzmv01000069_pro_12	rqxy01000012_pro_1	rser01000014_pro_90	rrcr01000017_pro_1	rwhv01000011_pro_94	NA	NA	PAQ31011_00253, PAQ31011_00537, PAQ31011_03883	PBR20603_01037	maos01000001_pro_83, maos01000042_pro_7	PCA20602_01192, PCA20602_03130	PCA31118_00631, PCA31118_01907	B6_02954	PCE31106_01625	PCE31107_01952	PCO31010_00595, PCO31010_03932	PCO31110_01384	PCO31111_02846	kb944435_pro_100	PEP31012_01673	cp011807_pro_2359	NA	NA	PFI31113_00356	PHO31112_03639	PIN31009_02745, PIN31009_02852	PIN31115_03482, PIN31115_03546	PMO31116_00397	cp013480_pro_2031, cp013480_pro_2091	NA	NA	PPN31114_00412, PPN31114_01674	NA
OG0000245	NA	PAN31117_01768	NA	cp011501_pro_2554	cp013481_pro_2541	cp014018_pro_2948	PAP18089_04627	rhsh01000001_pro_259	rhsg01000001_pro_299	rwhx01000002_pro_28, rwhx01000060_pro_29	pyya01000004_pro_30	rzmt01000025_pro_39, rzmt01000063_pro_9	rzmu01000002_pro_62	rwhw01000001_pro_200	nbta01000023_pro_94	rses01000023_pro_42	rzmv01000003_pro_198	rqxy01000013_pro_62	rser01000002_pro_195	rrcr01000002_pro_62	rwhv01000004_pro_26	cp011279_pro_918	cp010518_pro_918	NA	NA	NA	PCA20602_04924	NA	B6_02818, B6_02828	PCE31106_04200, PCE31106_04209, PCE31106_04519, PCE31106_04529, PCE31106_04774	PCE31107_02079	PCO31010_00237	PCO31110_04572, PCO31110_04782	PCO31111_02277	kb944429_pro_52, kb944443_pro_34	NA	NA	NA	NA	NA	PHO31112_02746, PHO31112_03189	PIN31009_01533	PIN31115_01715	PMO31116_00208	cp013480_pro_3697	PNO31109_02997	cp011253_pro_673	PPN31114_04912	cp006900_pro_1974, cp006900_pro_310
OG0000246	NA	PAN31117_02130, PAN31117_05371	PAN31108_02227, PAN31108_05151	cp011501_pro_109	cp013481_pro_153	cp014018_pro_516	PAP18089_00117	rhsh01000007_pro_112	rhsg01000005_pro_112	rwhx01000022_pro_34	pyya01000025_pro_44	rzmt01000022_pro_34	rzmu01000006_pro_111	rwhw01000016_pro_31	nbta01000009_pro_294	rses01000022_pro_34	rzmv01000006_pro_112	rqxy01000024_pro_37	rser01000027_pro_43	rrcr01000005_pro_111	rwhv01000037_pro_9	cp011279_pro_3127	cp010518_pro_3129	PAQ31011_04672	PBR20603_02952	maos01000072_pro_71, maos01000079_pro_6	PCA20602_04141	PCA31118_03626, PCA31118_05379	B6_01822	PCE31106_04532	PCE31107_03910	PCO31010_01409	PCO31110_01154	PCO31111_01264	kb944456_pro_99	PEP31012_03066	cp011807_pro_4280	jtcr01000025_pro_1	jtcs01000029_pro_76	PFI31113_03191	PHO31112_02448	PIN31009_04845	PIN31115_00113, PIN31115_02864	PMO31116_03619	cp013480_pro_5080	PNO31109_02081	cp011253_pro_4560	PPN31114_01960	cp006900_pro_4152
OG0000247	NA	PAN31117_02473	PAN31108_04167	cp011501_pro_1582	cp013481_pro_3425	cp014018_pro_2014	PAP18089_05132	rhsh01000024_pro_55	rhsg01000020_pro_55	rwhx01000024_pro_2	pyya01000053_pro_2	rzmt01000052_pro_2	rzmu01000057_pro_2	rwhw01000085_pro_7	nbta01000014_pro_230	rses01000069_pro_2	rzmv01000066_pro_8	rqxy01000069_pro_8	rser01000070_pro_2	rrcr01000071_pro_2	rwhv01000072_pro_2	cp011279_pro_4637	cp010518_pro_4622	PAQ31011_03942	PBR20603_03184	maos01000050_pro_79	PCA20602_03358	PCA31118_03351	B6_00656	PCE31106_00946	PCE31107_01301	PCO31010_04025	PCO31110_05098	PCO31111_02368	kb944434_pro_136, kb944458_pro_56	PEP31012_00431	cp011807_pro_1260	jtcr01000002_pro_98	jtcs01000013_pro_98	PFI31113_02677	PHO31112_02693	PIN31009_01577	PIN31115_01759	PMO31116_00489, PMO31116_03831	cp013480_pro_3638	PNO31109_02950	cp011253_pro_1339, cp011518_pro_128	PPN31114_04930	cp006900_pro_1727, cp006900_pro_2882
OG0000248	NA	PAN31117_02597	NA	NA	NA	NA	NA	NA	NA	NA	NA	NA	NA	NA	NA	NA	NA	NA	NA	NA	NA	NA	NA	PAQ31011_03291	NA	NA	NA	PCA31118_01642	NA	NA	NA	PCO31010_02919	NA	NA	NA	NA	NA	jtcr01000014_pro_147, jtcr01000014_pro_149, jtcr01000048_pro_61	jtcs01000001_pro_84, jtcs01000030_pro_37, jtcs01000030_pro_39	PFI31113_00856, PFI31113_00858, PFI31113_00861, PFI31113_04100	PHO31112_00733, PHO31112_01377, PHO31112_02032, PHO31112_02033, PHO31112_02613, PHO31112_02622, PHO31112_02628, PHO31112_02811, PHO31112_03147, PHO31112_03148, PHO31112_03239, PHO31112_03277, PHO31112_03282, PHO31112_03287, PHO31112_03300, PHO31112_04047, PHO31112_04053, PHO31112_04410, PHO31112_04721, PHO31112_04724, PHO31112_04925, PHO31112_04998, PHO31112_05034, PHO31112_05332, PHO31112_05336,…	NA	NA	NA	NA	NA	cp011253_pro_1742	NA	NA
OG0000249	NA	PAN31117_03353	PAN31108_01056, PAN31108_03140	cp011501_pro_328	cp013481_pro_4726	cp014018_pro_724	PAP18089_00341	rhsh01000011_pro_7	rhsg01000005_pro_318	rwhx01000008_pro_109	pyya01000003_pro_227	rzmt01000002_pro_190	rzmu01000004_pro_3	rwhw01000004_pro_87	nbta01000009_pro_516	rses01000005_pro_136	rzmv01000010_pro_3	rqxy01000004_pro_109	rser01000021_pro_3	rrcr01000009_pro_109	rwhv01000007_pro_108	cp011279_pro_3394	cp010518_pro_3377	PAQ31011_01222	PBR20603_00745	maos01000002_pro_11, maos01000028_pro_272, maos01000036_pro_5	PCA20602_01473	PCA31118_01202	B6_00465, B6_00502	PCE31106_03169, PCE31106_03203	PCE31107_00117, PCE31107_00169	PCO31010_01614	PCO31110_00918	PCO31111_00722	kb944454_pro_930	PEP31012_04378	cp011807_pro_29	jtcr01000027_pro_90	jtcs01000018_pro_90	PFI31113_02987	PHO31112_00537	PIN31009_00141	PIN31115_00348	PMO31116_01555	cp013480_pro_55	NA	NA	PPN31114_02164	cp006900_pro_3984
OG0000250	NA	PAN31117_03675	PAN31108_01149	cp011501_pro_3596	cp013481_pro_1392	cp014018_pro_4029	PAP18089_02731	rhsh01000003_pro_276	rhsg01000006_pro_275	rwhx01000064_pro_15	pyya01000051_pro_15	rzmt01000007_pro_9	rzmu01000054_pro_15	rwhw01000067_pro_15	nbta01000013_pro_9	rses01000090_pro_9	rzmv01000024_pro_15	rqxy01000066_pro_9	rser01000059_pro_15	rrcr01000077_pro_2	rwhv01000092_pro_9	cp011279_pro_1960	cp010518_pro_1959	PAQ31011_03774	PBR20603_02689	maos01000037_pro_26, maos01000050_pro_60	PCA20602_02319, PCA20602_03341	PCA31118_05034	B6_02767, B6_04362	PCE31106_02521	PCE31107_04135	PCO31010_04210	PCO31110_03674	PCO31111_03243	kb944431_pro_67	PEP31012_04061	cp011807_pro_3211	jtcr01000024_pro_79	jtcs01000037_pro_73	PFI31113_04272	PHO31112_04376	PIN31009_02433, PIN31009_04436	PIN31115_03400, PIN31115_03867	PMO31116_02253	cp013480_pro_1173, cp013480_pro_2389	PNO31109_03807	cp011253_pro_3471	PPN31114_00780, PPN31114_04486	cp006900_pro_1028
OG0000251	NA	PAN31117_04815, PAN31117_05047, PAN31117_05048, PAN31117_05049, PAN31117_05391, PAN31117_05392, PAN31117_05393, PAN31117_05419	PAN31108_04619, PAN31108_05228	NA	NA	NA	NA	NA	NA	NA	NA	NA	NA	NA	NA	NA	NA	NA	NA	NA	NA	NA	NA	PAQ31011_05094, PAQ31011_05096, PAQ31011_05190, PAQ31011_05192	NA	maos01000033_pro_1, maos01000087_pro_2	PCA20602_03639	PCA31118_04299, PCA31118_04301, PCA31118_04303, PCA31118_04305, PCA31118_04307, PCA31118_04311, PCA31118_04314, PCA31118_04315	NA	NA	NA	PCO31010_04537, PCO31010_04540, PCO31010_04542, PCO31010_04544	NA	NA	NA	NA	cp011807_pro_4004, cp011807_pro_4006	NA	NA	PFI31113_04098	NA	PIN31009_00433	PIN31115_00612	PMO31116_00722, PMO31116_03586, PMO31116_03588	cp013480_pro_319	NA	NA	NA	NA
OG0000252	muhy01000001_pro_16	PAN31117_03656	PAN31108_01168	cp011501_pro_3579	cp013481_pro_1410	cp014018_pro_4011	PAP18089_02750	rhsh01000003_pro_258	rhsg01000006_pro_257	rwhx01000031_pro_4	pyya01000018_pro_5	rzmt01000007_pro_27	rzmu01000016_pro_4	rwhw01000020_pro_4	nbta01000013_pro_27	rses01000029_pro_4	rzmv01000007_pro_142	rqxy01000015_pro_4	rser01000063_pro_4	rrcr01000031_pro_4	rwhv01000012_pro_4	cp011279_pro_1943	cp010518_pro_1942	PAQ31011_03755	PBR20603_02708	maos01000037_pro_45	PCA20602_02300	PCA31118_05015	B6_02393	PCE31106_02502	PCE31107_04116	PCO31010_04229	PCO31110_03692	PCO31111_03261	kb944431_pro_85	PEP31012_04079	cp011807_pro_3192, cp011808_pro_195	jtcr01000024_pro_61	jtcs01000037_pro_55	PFI31113_04290	PHO31112_04355	PIN31009_04417	PIN31115_03381	PMO31116_02234	cp013480_pro_1191	PNO31109_03789	cp011253_pro_3452, cp011518_pro_319	PPN31114_04467	cp006900_pro_1043
OG0000253	muhy01000001_pro_17	PAN31117_03655	PAN31108_01169	cp011501_pro_3578	cp013481_pro_1411	cp014018_pro_4010	PAP18089_02751	rhsh01000003_pro_257	rhsg01000006_pro_256	rwhx01000031_pro_5	pyya01000018_pro_6	rzmt01000007_pro_28	rzmu01000016_pro_5	rwhw01000020_pro_5	nbta01000013_pro_28	rses01000029_pro_5	rzmv01000007_pro_141	rqxy01000015_pro_5	rser01000063_pro_5	rrcr01000031_pro_5	rwhv01000012_pro_5	cp011279_pro_1942	cp010518_pro_1941	PAQ31011_03754	PBR20603_02709	maos01000037_pro_46	PCA20602_02299	PCA31118_05014	B6_02394	PCE31106_02501	PCE31107_04115	PCO31010_04230	PCO31110_03693	PCO31111_03262	kb944431_pro_86	PEP31012_04080	cp011807_pro_3191, cp011808_pro_194	jtcr01000024_pro_60	jtcs01000037_pro_54	PFI31113_04291	PHO31112_04354	PIN31009_04416	PIN31115_03380	PMO31116_02233	cp013480_pro_1192	PNO31109_03788	cp011253_pro_3451, cp011518_pro_318	PPN31114_04466	cp006900_pro_1044
OG0000254	muhy01000001_pro_212	PAN31117_02361	PAN31108_04499	cp011501_pro_1502, cp011501_pro_2919	cp013481_pro_3567	cp014018_pro_1898	PAP18089_04841	rhsh01000023_pro_53	rhsg01000019_pro_53	rwhx01000018_pro_31	pyya01000011_pro_79	rzmt01000023_pro_39	rzmu01000010_pro_78	rwhw01000022_pro_31	nbta01000014_pro_145	rses01000027_pro_31	rzmv01000033_pro_21	rqxy01000007_pro_78	rser01000036_pro_20	rrcr01000011_pro_78	rwhv01000023_pro_30	cp011279_pro_1283, cp011279_pro_4557	cp010518_pro_1282, cp010518_pro_4542	PAQ31011_04051	PBR20603_03117	maos01000036_pro_59	PCA20602_03485	PCA31118_03468	B6_01283, B6_03870	PCE31106_03754	PCE31107_04221	PCO31010_03177	PCO31110_04679	PCO31111_02478	kb944429_pro_100	PEP31012_02818, PEP31012_03988	cp011807_pro_1208	jtcr01000028_pro_19	jtcs01000023_pro_19	PFI31113_02579	PHO31112_02815	PIN31009_01450	PIN31115_01636	PMO31116_04265	cp013480_pro_3780	PNO31109_03016	cp011253_pro_1256	PPN31114_00174, PPN31114_04838	cp006900_pro_2930
OG0000255	muhy01000001_pro_342	PAN31117_00845	PAN31108_00307	cp011501_pro_2829	cp013481_pro_2791	cp014018_pro_3198	PAP18089_02352	rhsh01000001_pro_10	rhsg01000001_pro_50	rwhx01000017_pro_50	pyya01000017_pro_49	rzmt01000014_pro_47	rzmu01000002_pro_307	rwhw01000028_pro_6	nbta01000023_pro_343	rses01000013_pro_50	rzmv01000014_pro_34	rqxy01000012_pro_45	rser01000014_pro_47	rrcr01000017_pro_45	rwhv01000011_pro_50	cp011279_pro_1193	cp010518_pro_1193	PAQ31011_00586	PBR20603_01081	maos01000044_pro_4	PCA20602_01236	PCA31118_00585	B6_02516	PCE31106_01564	PCE31107_01891	PCO31010_00639	PCO31110_01429	PCO31111_02908	kb944435_pro_162	PEP31012_01717	cp011807_pro_2403	jtcr01000004_pro_269	jtcs01000003_pro_175	PFI31113_00312	PHO31112_03577	PIN31009_01535, PIN31009_02900	PIN31115_01717, PIN31115_02497	PMO31116_00441	cp013480_pro_1984, cp013480_pro_3695	PNO31109_00704	cp011253_pro_2645	PPN31114_00349	cp006900_pro_1773
OG0000256	muhy01000001_pro_368	PAN31117_02616	PAN31108_01599	cp011501_pro_1962	cp013481_pro_2031	cp014018_pro_2412	PAP18089_01480	rhsh01000004_pro_181	rhsg01000002_pro_292	rwhx01000001_pro_167	pyya01000001_pro_343	rzmt01000001_pro_101	rzmu01000001_pro_274	rwhw01000002_pro_106	nbta01000022_pro_343	rses01000001_pro_190	rzmv01000002_pro_105	rqxy01000001_pro_47	rser01000003_pro_13	rrcr01000003_pro_118	rwhv01000002_pro_46	cp011279_pro_325	cp010518_pro_325	PAQ31011_03305	PBR20603_01844	maos01000105_pro_47	PCA20602_02547	PCA31118_02897	B6_00391, B6_01183	PCE31106_01754, PCE31106_04030	PCE31107_02310	PCO31010_02937	PCO31110_02536, PCO31110_03304	PCO31111_01938	kb944423_pro_375, kb944457_pro_46	PEP31012_02477	cp011807_pro_1649	jtcr01000012_pro_56	jtcs01000007_pro_45	PFI31113_01184	PHO31112_01067	PIN31009_02104	PIN31115_02295	PMO31116_02618	cp013480_pro_3172	PNO31109_01616	cp011253_pro_1755	PPN31114_01432	cp006900_pro_2498
OG0000257	NA	PAN31117_00478, PAN31117_00479	PAN31108_02630	cp011501_pro_3143	cp013481_pro_3079	cp014018_pro_3471	PAP18089_04196	rhsh01000017_pro_24	rhsg01000016_pro_23	rwhx01000013_pro_23	pyya01000009_pro_56	rzmt01000015_pro_24	rzmu01000015_pro_24	rwhw01000006_pro_23	nbta01000012_pro_65	rses01000007_pro_42	rzmv01000008_pro_57	rqxy01000006_pro_42	rser01000013_pro_66	rrcr01000004_pro_66	rwhv01000003_pro_75	cp011279_pro_1507	cp010518_pro_1506	PAQ31011_00067, PAQ31011_00068, PAQ31011_00219, PAQ31011_00682	NA	NA	NA	PCA31118_01014, PCA31118_01983, PCA31118_02039, PCA31118_02247	NA	NA	NA	NA	PCO31110_01894	PCO31111_01081	kb944426_pro_93	NA	NA	jtcr01000020_pro_109, jtcr01000023_pro_2, jtcr01000023_pro_3	jtcs01000008_pro_129, jtcs01000008_pro_130, jtcs01000014_pro_109	PFI31113_04949	PHO31112_04035	PIN31009_01731, PIN31009_01732, PIN31009_02363, PIN31009_03098	PIN31115_02680, PIN31115_03639, PIN31115_03936	NA	cp013480_pro_1825, cp013480_pro_2457, cp013480_pro_762, cp013480_pro_763	NA	NA	PPN31114_00852, PPN31114_00884, PPN31114_00885	NA
OG0000258	NA	PAN31117_00649	PAN31108_00136	cp011501_pro_2622	cp013481_pro_2617	cp014018_pro_3024	PAP18089_04704	rhsh01000001_pro_183	rhsg01000001_pro_223	rwhx01000002_pro_100	pyya01000004_pro_102	rzmt01000006_pro_35	rzmu01000002_pro_134	rwhw01000001_pro_128	nbta01000023_pro_170	rses01000004_pro_30	rzmv01000003_pro_126	rqxy01000016_pro_54	rser01000002_pro_126	rrcr01000002_pro_134	rwhv01000004_pro_98	cp011279_pro_986	cp010518_pro_986	PAQ31011_00379	NA	maos01000039_pro_182	PCA20602_01029	PCA31118_00769	B6_00157	NA	NA	PCO31010_00389	PCO31110_00004, PCO31110_00023, PCO31110_04622	PCO31111_02310, PCO31111_04967, PCO31111_04993	kb944443_pro_4, kb944454_pro_26, kb944454_pro_6	PEP31012_03888	cp011807_pro_2232	jtcr01000004_pro_120	jtcs01000003_pro_26	PFI31113_00480	PHO31112_03119, PHO31112_05277, PHO31112_05287	PIN31009_02639	PIN31115_03663	PMO31116_00755	cp013480_pro_2197	PNO31109_00829	cp011253_pro_2446	PPN31114_00582	cp006900_pro_1902
OG0000259	NA	PAN31117_00872, PAN31117_03140	PAN31108_00333	cp011501_pro_2854	cp013481_pro_2816	cp014018_pro_3222	PAP18089_02380	rhsh01000035_pro_26	rhsg01000001_pro_26	rwhx01000017_pro_26, rwhx01000036_pro_62	pyya01000017_pro_25	rzmt01000014_pro_71, rzmt01000035_pro_62	rzmu01000002_pro_331	rwhw01000042_pro_19	nbta01000023_pro_368	rses01000013_pro_26	rzmv01000014_pro_58	rqxy01000012_pro_69	rser01000014_pro_24	rrcr01000017_pro_69	rwhv01000011_pro_26	cp011279_pro_1218	cp010518_pro_1218	PAQ31011_00615	PBR20603_01108	maos01000020_pro_165, maos01000051_pro_21	PCA20602_01263	PCA31118_00558	B6_02543	PCE31106_01537	PCE31107_01864	PCO31010_00666	PCO31110_01457	PCO31111_02936	kb944435_pro_187, kb944451_pro_22	PEP31012_01745	cp011807_pro_2426	jtcr01000051_pro_10	jtcs01000028_pro_36	PFI31113_00284	PHO31112_00759, PHO31112_03548	PIN31009_02929	PIN31115_02526	PMO31116_00467, PMO31116_04673	cp013480_pro_1961	PNO31109_00676	cp011253_pro_2669	PPN31114_00322	cp006900_pro_1752
OG0000260	NA	PAN31117_01932	PAN31108_02652	cp011501_pro_2460	NA	cp014018_pro_2849	PAP18089_04035	rhsh01000001_pro_359	rhsg01000001_pro_399	rwhx01000068_pro_4	pyya01000015_pro_12	rzmt01000010_pro_85	rzmu01000035_pro_4	rwhw01000041_pro_32	nbta01000006_pro_98	rses01000040_pro_32	rzmv01000026_pro_4	rqxy01000053_pro_28	rser01000019_pro_14	rrcr01000022_pro_56	rwhv01000005_pro_32	cp011279_pro_824	cp010518_pro_824	PAQ31011_00094, PAQ31011_00213, PAQ31011_00676	PBR20603_00954	maos01000001_pro_113, maos01000046_pro_35	PCA20602_00813	PCA31118_00991, PCA31118_02013	B6_02727	PCE31106_03093	PCE31107_02191	PCO31010_00090	PCO31110_04453	NA	kb944424_pro_96	NA	cp011807_pro_2065, cp011807_pro_634	jtcr01000037_pro_148	jtcs01000026_pro_148	PFI31113_00675	PHO31112_03816	PIN31009_00863, PIN31009_03866	PIN31115_01035, PIN31115_04028	PMO31116_00087	cp013480_pro_2568, cp013480_pro_755	PNO31109_00938	cp011253_pro_2216	PPN31114_00830, PPN31114_00966	cp006900_pro_2068
OG0000261	NA	PAN31117_02050	PAN31108_02104, PAN31108_03204	cp011501_pro_32	cp013481_pro_226	cp014018_pro_434	PAP18089_00032	rhsh01000007_pro_31	rhsg01000005_pro_31	rwhx01000021_pro_39	pyya01000029_pro_30	rzmt01000024_pro_31	rzmu01000006_pro_31	rwhw01000055_pro_33	nbta01000009_pro_211	rses01000024_pro_31	rzmv01000006_pro_31	rqxy01000021_pro_44	rser01000029_pro_29	rrcr01000005_pro_31	rwhv01000020_pro_38	cp011279_pro_3050	cp010518_pro_3052	PAQ31011_00264, PAQ31011_04590	PBR20603_03033	maos01000039_pro_79, maos01000049_pro_44	PCA20602_00933, PCA20602_04066	PCA31118_03708	B6_04102	PCE31106_04294	PCE31107_02761, PCE31107_04674	PCO31010_00283, PCO31010_01329	PCO31110_01240	PCO31111_01173	kb944456_pro_183	PEP31012_03140	cp011807_pro_4191	jtcr01000025_pro_73	jtcs01000029_pro_4	PFI31113_03101	PHO31112_02368	PIN31009_04926	PIN31115_00033	PMO31116_04427	cp013480_pro_4998	PNO31109_02245	cp011253_pro_4486	PPN31114_01882	NA
OG0000262	NA	PAN31117_02065	PAN31108_02119	cp011501_pro_48	cp013481_pro_212	cp014018_pro_451	PAP18089_00049	rhsh01000007_pro_48	rhsg01000005_pro_48	rwhx01000021_pro_22	pyya01000029_pro_13	rzmt01000024_pro_48	rzmu01000006_pro_48	rwhw01000055_pro_16	nbta01000009_pro_228	rses01000024_pro_48	rzmv01000006_pro_49	rqxy01000021_pro_27	rser01000029_pro_13	rrcr01000005_pro_48	rwhv01000020_pro_21	cp011279_pro_3066	cp010518_pro_3068	PAQ31011_04605	PBR20603_03017	maos01000023_pro_51, maos01000039_pro_33, maos01000072_pro_155	PCA20602_00894, PCA20602_01291, PCA20602_04081	PCA31118_03692	B6_01096, B6_01754	PCE31106_01326, PCE31106_04279	PCE31107_03847	PCO31010_01344	PCO31110_01224	PCO31111_01190	kb944456_pro_167	PEP31012_03125	cp011807_pro_4206	jtcr01000025_pro_57	jtcs01000029_pro_20	PFI31113_03118	PHO31112_02384	PIN31009_04909	PIN31115_00050	PMO31116_04444	cp013480_pro_5014	PNO31109_02229	cp011253_pro_294, cp011253_pro_4500	PPN31114_01898	cp006900_pro_4208
OG0000263	NA	PAN31117_02686	PAN31108_01530, PAN31108_03206	cp011501_pro_2030	cp013481_pro_2128	cp014018_pro_2482	PAP18089_01552	rhsh01000004_pro_251	rhsg01000002_pro_362	rwhx01000001_pro_98	pyya01000001_pro_413	rzmt01000001_pro_170	rzmu01000001_pro_343	rwhw01000002_pro_175	nbta01000022_pro_272	rses01000026_pro_49	rzmv01000002_pro_174	rqxy01000001_pro_116	rser01000003_pro_80	rrcr01000003_pro_49	rwhv01000002_pro_115	cp011279_pro_393	cp010518_pro_393	PAQ31011_00266, PAQ31011_03383	PBR20603_01916	maos01000039_pro_81, maos01000105_pro_118	PCA20602_00935, PCA20602_02620	PCA31118_02971	B6_00278	PCE31106_04103	PCE31107_02760, PCE31107_04361	PCO31010_00285, PCO31010_03012	PCO31110_02607	PCO31111_02050	kb944423_pro_305	PEP31012_00083, PEP31012_01795, PEP31012_04226	cp011807_pro_1718	jtcr01000040_pro_13	jtcs01000017_pro_190	PFI31113_01257	PHO31112_01137	PIN31009_02177	PIN31115_02368	PMO31116_04354	cp013480_pro_3100	PNO31109_03734	cp011253_pro_1824	PPN31114_01356	cp006900_pro_2445
OG0000264	NA	PAN31117_02865	PAN31108_02398	cp011501_pro_1369	cp013481_pro_3682	cp014018_pro_1775	PAP18089_03485	rhsh01000013_pro_48	rhsg01000008_pro_189	rwhx01000040_pro_4	pyya01000013_pro_65	rzmt01000011_pro_47	rzmu01000013_pro_65	rwhw01000039_pro_4	nbta01000014_pro_27	rses01000034_pro_47	rzmv01000012_pro_65	rqxy01000014_pro_59	rser01000010_pro_64	rrcr01000051_pro_36	rwhv01000042_pro_47	cp011279_pro_4424	cp010518_pro_4409	PAQ31011_04279	PBR20603_02110	maos01000013_pro_67	PCA20602_03864	PCA31118_03225	B6_03831	PCE31106_02007	PCE31107_03134	PCO31010_03301	PCO31110_04515, PCO31110_04980	PCO31111_02226, PCO31111_03751	kb944425_pro_72, kb944443_pro_91	PEP31012_02695	cp011807_pro_1083	jtcr01000004_pro_37, jtcr01000017_pro_16	jtcs01000021_pro_16, jtcs01000034_pro_58	PFI31113_00606, PFI31113_02453	PHO31112_00721	PIN31009_01329	PIN31115_01515	PMO31116_02939	cp013480_pro_3895	PNO31109_03310	cp011253_pro_1129	PPN31114_04716	cp006900_pro_3035
OG0000265	NA	PAN31117_03440	PAN31108_00187, PAN31108_00971	cp011501_pro_397	cp013481_pro_4654	cp014018_pro_796	PAP18089_00414	rhsh01000005_pro_47	rhsg01000007_pro_47	rwhx01000046_pro_22	pyya01000020_pro_14	rzmt01000002_pro_261	rzmu01000042_pro_13	rwhw01000051_pro_23	nbta01000001_pro_72	rses01000055_pro_23	rzmv01000019_pro_13	NA	rser01000018_pro_13	NA	rwhv01000051_pro_13	cp011279_pro_3463	cp010518_pro_3446	PAQ31011_00473, PAQ31011_01308	PBR20603_00667	maos01000002_pro_90, maos01000034_pro_23	PCA20602_01118, PCA20602_01562	PCA31118_01286, PCA31118_01682	B6_02034	PCE31106_00077	PCE31107_00241	PCO31010_00531, PCO31010_01701	NA	NA	NA	PEP31012_01548	cp011807_pro_107	jtcr01000046_pro_32	jtcs01000018_pro_158	PFI31113_02912	PHO31112_00459	PIN31009_00227, PIN31009_02737	PIN31115_00434, PIN31115_03554	PMO31116_01488	cp013480_pro_140, cp013480_pro_2099	PNO31109_01912	cp011253_pro_93	PPN31114_00489, PPN31114_02244	cp006900_pro_3929
OG0000266	NA	PAN31117_03601	PAN31108_01228	cp011501_pro_3524	cp013481_pro_1465	cp014018_pro_3956	PAP18089_02806	rhsh01000003_pro_203	rhsg01000006_pro_202	rwhx01000031_pro_59	pyya01000018_pro_60	rzmt01000007_pro_81	rzmu01000016_pro_59	rwhw01000020_pro_59	nbta01000013_pro_82	rses01000029_pro_59	rzmv01000007_pro_87	rqxy01000015_pro_59	rser01000024_pro_32	rrcr01000031_pro_59	rwhv01000012_pro_58	cp011279_pro_1888	cp010518_pro_1887	PAQ31011_03697	PBR20603_02763	maos01000045_pro_28	PCA20602_02240	PCA31118_04411	B6_03712	PCE31106_02457	PCE31107_03300	PCO31010_04286	PCO31110_03747	PCO31111_03309	kb944431_pro_139	PEP31012_04387	cp011807_pro_3140	jtcr01000024_pro_9	jtcs01000037_pro_3	PFI31113_04578	PHO31112_04541	PIN31009_03383, PIN31009_04358	PIN31115_02978, PIN31115_03324	PMO31116_02187	cp013480_pro_1246, cp013480_pro_1584	PNO31109_01867, PNO31109_03620	cp011253_pro_3398	PPN31114_04066, PPN31114_04411	cp006900_pro_1084
OG0000267	NA	NA	PAN31108_03189	cp011501_pro_2505	cp013481_pro_2493	cp014018_pro_2897	PAP18089_04086	rhsh01000001_pro_310	rhsg01000001_pro_350	rwhx01000037_pro_33, rwhx01000047_pro_7	pyya01000006_pro_122, pyya01000015_pro_60, pyya01000022_pro_33	rzmt01000004_pro_33, rzmt01000026_pro_7	rzmu01000008_pro_33, rzmu01000053_pro_18	rwhw01000010_pro_2, rwhw01000066_pro_17	nbta01000006_pro_49	rses01000006_pro_102, rses01000064_pro_7, rses01000115_pro_2	rzmv01000009_pro_102, rzmv01000026_pro_53	rqxy01000003_pro_33, rqxy01000062_pro_18	rser01000006_pro_36, rser01000009_pro_22, rser01000019_pro_63	rrcr01000008_pro_102, rrcr01000022_pro_7	rwhv01000048_pro_16, rwhv01000066_pro_7	cp011279_pro_869	cp010518_pro_869	PAQ31011_00162	PBR20603_00999	NA	NA	PCA31118_05219	NA	PCE31106_01493, PCE31106_01496	PCE31107_00412	NA	PCO31110_04493	PCO31111_02187	kb944424_pro_136	PEP31012_02293	cp011807_pro_1304, cp011808_pro_271	jtcr01000004_pro_23	jtcs01000034_pro_72	PFI31113_00622	PHO31112_03770	NA	NA	PMO31116_00133, PMO31116_03902	NA	NA	NA	NA	cp006900_pro_2032, cp006900_pro_2152
OG0000268	NA	NA	PAN31108_03208	NA	NA	NA	NA	NA	NA	NA	NA	NA	NA	NA	NA	NA	NA	NA	NA	NA	NA	NA	NA	PAQ31011_03995, PAQ31011_04818	NA	maos01000023_pro_44, maos01000023_pro_53, maos01000026_pro_79	NA	PCA31118_01582	B6_00539	PCE31106_03530	PCE31107_04445	PCO31010_01240, PCO31010_04069	PCO31110_00029, PCO31110_01826, PCO31110_01831	PCO31111_01011, PCO31111_04976	kb944426_pro_30, kb944454_pro_35	PEP31012_02211	cp011807_pro_382	jtcr01000020_pro_78	jtcs01000014_pro_78	NA	PHO31112_03980	PIN31009_01466, PIN31009_01553, PIN31009_02551	PIN31115_01652, PIN31115_01735, PIN31115_03749	PMO31116_03881	cp013480_pro_2281, cp013480_pro_3678, cp013480_pro_3764	PNO31109_00085	NA	PPN31114_00643	cp006900_pro_2840, cp006900_pro_3363, cp006900_pro_892
OG0000269	muhy01000001_pro_80	PAN31117_04059	PAN31108_04586	cp011501_pro_1107	cp013481_pro_3947	cp014018_pro_1504	PAP18089_04978	rhsh01000020_pro_62	rhsg01000018_pro_62	rwhx01000045_pro_42	pyya01000031_pro_28	rzmt01000032_pro_42	rzmu01000041_pro_42	rwhw01000050_pro_42	nbta01000005_pro_44	rses01000049_pro_42	rzmv01000054_pro_6	rqxy01000037_pro_20	rser01000030_pro_40	rrcr01000037_pro_20	rwhv01000069_pro_6	cp011279_pro_4175	cp010518_pro_4160	PAQ31011_02113	PBR20603_03205, PBR20603_04622	maos01000025_pro_72	PCA20602_03258	PCA31118_04890	B6_01244, B6_01245	PCE31106_00853	PCE31107_00947, PCE31107_04537	PCO31010_05203	PCO31110_00092	PCO31111_04243	kb944454_pro_86	PEP31012_00904	cp011807_pro_848, cp011809_pro_87	jtcr01000038_pro_35	jtcs01000032_pro_37	PFI31113_03425	PHO31112_03455, PHO31112_04615	PIN31009_01106	PIN31115_01299	PMO31116_00775	cp013480_pro_993	PNO31109_03888	cp011253_pro_902, cp011518_pro_393	PPN31114_03083	cp006900_pro_3255
OG0000270	muhy01000001_pro_198	PAN31117_04758	PAN31108_01728, PAN31108_02426	cp011501_pro_1843	cp013481_pro_1909	cp014018_pro_2287	PAP18089_01199	rhsh01000004_pro_55	rhsg01000002_pro_166	rwhx01000005_pro_149	pyya01000001_pro_217	rzmt01000019_pro_63	rzmu01000001_pro_149	rwhw01000005_pro_132	nbta01000022_pro_466	rses01000001_pro_65	rzmv01000023_pro_63	rqxy01000059_pro_14	rser01000004_pro_111	rrcr01000006_pro_65	rwhv01000017_pro_19	cp011279_pro_207	cp010518_pro_207	PAQ31011_03174	PBR20603_01720, PBR20603_03994	maos01000028_pro_81	PCA20602_02420	PCA31118_02772	B6_03347	PCE31106_01871	PCE31107_02427	PCO31010_02801	PCO31110_02406	PCO31111_01818	kb944423_pro_494	PEP31012_02355	cp011807_pro_1526	jtcr01000014_pro_17	jtcs01000030_pro_169	PFI31113_01061	PHO31112_00942, PHO31112_03730, PHO31112_04893	PIN31009_01971	PIN31115_02162	PMO31116_02485	cp013480_pro_3304	PNO31109_01492	cp011253_pro_1632	PPN31114_01566	cp006900_pro_2622
OG0000271	muhy01000001_pro_321	PAN31117_01987	PAN31108_02597	cp011501_pro_2410	cp013481_pro_2439	cp014018_pro_2797	PAP18089_03981	rhsh01000001_pro_411	rhsg01000001_pro_451	rwhx01000014_pro_32	pyya01000023_pro_32	rzmt01000010_pro_32	rzmu01000017_pro_32	rwhw01000012_pro_40	nbta01000006_pro_151	rses01000002_pro_126, rses01000002_pro_31	rzmv01000017_pro_50	rqxy01000018_pro_30	rser01000023_pro_41	rrcr01000014_pro_32	rwhv01000005_pro_86	cp011279_pro_774	cp010518_pro_774	PAQ31011_00032	PBR20603_00898	maos01000054_pro_20	PCA20602_00759	PCA31118_00835	B6_03939	PCE31106_03019	PCE31107_02684	PCO31010_00035	PCO31110_04395	PCO31111_02096, PCO31111_02683	kb944424_pro_39	PEP31012_02888	cp011807_pro_2177, cp011807_pro_2843	jtcr01000037_pro_105	jtcs01000026_pro_105	PFI31113_00730	PHO31112_03874	PIN31009_03806	PIN31115_04088	PMO31116_03994	cp013480_pro_2683	PNO31109_00864	cp011253_pro_2161, cp011253_pro_2363	PPN31114_01022	cp006900_pro_181
OG0000272	muhy01000001_pro_585	PAN31117_01202	PAN31108_04339	cp011501_pro_4347	cp013481_pro_642	cp014018_pro_91	PAP18089_03358	rhsh01000008_pro_114	rhsg01000009_pro_115	rwhx01000032_pro_36	pyya01000040_pro_7	rzmt01000018_pro_60	rzmu01000019_pro_36	rwhw01000053_pro_36	nbta01000004_pro_134	rses01000016_pro_60	rzmv01000032_pro_26	rqxy01000031_pro_26	rser01000017_pro_33	rrcr01000015_pro_36	rwhv01000028_pro_26	cp011279_pro_2711	cp010518_pro_2710	PAQ31011_02253	PBR20603_03703	maos01000021_pro_58, maos01000050_pro_127, maos01000061_pro_141	PCA20602_00664	PCA31118_02663	B6_01334	PCE31106_03643	PCE31107_01038	PCO31010_04986	PCO31110_03000	PCO31111_03118	kb944457_pro_336	PEP31012_00738	cp011807_pro_3840	jtcr01000044_pro_14	jtcs01000024_pro_25	PFI31113_02259	PHO31112_01770	PIN31009_02973, PIN31009_04569	PIN31115_02570, PIN31115_04752	PMO31116_01932	cp013480_pro_4655	PNO31109_03935	cp011253_pro_4118	PPN31114_03832	cp006900_pro_371
OG0000273	muhy01000001_pro_661	PAN31117_02099	PAN31108_02195	cp011501_pro_80	cp013481_pro_183	cp014018_pro_486	PAP18089_00087	rhsh01000007_pro_82	rhsg01000005_pro_82	rwhx01000022_pro_64	pyya01000025_pro_14	rzmt01000022_pro_64	rzmu01000006_pro_81	rwhw01000016_pro_61	nbta01000009_pro_264	rses01000022_pro_64	rzmv01000006_pro_82	rqxy01000024_pro_7	rser01000027_pro_14	rrcr01000005_pro_81	rwhv01000068_pro_7	cp011279_pro_3098	cp010518_pro_3100	PAQ31011_04639	PBR20603_02983	maos01000072_pro_101	PCA20602_04110	PCA31118_03657	B6_01789	PCE31106_04564	PCE31107_03877	PCO31010_01374	PCO31110_01185	PCO31111_01234	kb944456_pro_130	PEP31012_03097	cp011807_pro_4250	jtcr01000025_pro_26	jtcs01000029_pro_51	PFI31113_03161	PHO31112_02417	PIN31009_04879	PIN31115_00080	PMO31116_03649, PMO31116_03895	cp013480_pro_5047	PNO31109_02111	cp011253_pro_4530	PPN31114_01928	cp006900_pro_4182
OG0000274	NA	PAN31117_00475, PAN31117_03249	PAN31108_04795	cp011501_pro_1672	cp013481_pro_3332	cp014018_pro_2106	PAP18089_05294	rhsh01000031_pro_34	rhsg01000024_pro_34	rwhx01000034_pro_35	pyya01000033_pro_18	rzmt01000031_pro_17	rzmu01000026_pro_17	rwhw01000034_pro_17	nbta01000014_pro_323	rses01000039_pro_5	rzmv01000035_pro_35	rqxy01000028_pro_17	rser01000034_pro_16	rrcr01000028_pro_17	rwhv01000043_pro_5	cp011279_pro_36	cp010518_pro_36	PAQ31011_02948	PBR20603_00706, PBR20603_04583	maos01000047_pro_16	PCA20602_02824	PCA31118_04994	B6_03479	PCE31106_03470	PCE31107_02556	PCO31010_03873	PCO31110_00886	PCO31111_00692	kb944454_pro_899	PEP31012_02157	cp011807_pro_1350	jtcr01000006_pro_16, jtcr01000027_pro_122	jtcs01000010_pro_12, jtcs01000018_pro_121	PFI31113_02951, PFI31113_04738	NA	PIN31009_01682	PIN31115_01864	PMO31116_04053	cp013480_pro_3532	PNO31109_02973, PNO31109_04084	cp011253_pro_1442	PPN31114_01809	cp006900_pro_2794
OG0000275	NA	PAN31117_01358, PAN31117_01493	PAN31108_02059	cp011501_pro_4005	cp013481_pro_993	cp014018_pro_4431	PAP18089_01854	rhsh01000006_pro_73	rhsg01000004_pro_260	rwhx01000007_pro_69	pyya01000008_pro_73	rzmt01000004_pro_201	rzmu01000020_pro_68	rwhw01000011_pro_64	nbta01000023_pro_764	rses01000019_pro_64	rzmv01000020_pro_69	rqxy01000025_pro_23	rser01000005_pro_67	rrcr01000023_pro_23	rwhv01000016_pro_63	cp011279_pro_2369	cp010518_pro_2368	PAQ31011_02428, PAQ31011_02568	PBR20603_02614	maos01000062_pro_1, maos01000069_pro_9	PCA20602_00369, PCA20602_00504	PCA31118_02414	NA	NA	NA	PCO31010_02450, PCO31010_02586	NA	NA	NA	NA	NA	jtcr01000009_pro_13	jtcs01000044_pro_54	PFI31113_01961, PFI31113_02099	NA	PIN31009_03902	PIN31115_04204	PMO31116_01768	cp013480_pro_4369, cp013480_pro_4517	PNO31109_00997, PNO31109_01126	cp011253_pro_3977	PPN31114_03476	cp006900_pro_502, cp006900_pro_608
OG0000276	NA	PAN31117_01640, PAN31117_01797	NA	cp011501_pro_3869	cp013481_pro_1133	cp014018_pro_4292	PAP18089_02043	rhsh01000022_pro_68	rhsg01000004_pro_122	rwhx01000063_pro_31	pyya01000044_pro_31	rzmt01000033_pro_3	rzmu01000009_pro_119	rwhw01000065_pro_2	nbta01000023_pro_624	rses01000063_pro_2	rzmv01000029_pro_31, rzmv01000029_pro_50	rqxy01000065_pro_31	rser01000056_pro_31	rrcr01000019_pro_80	rwhv01000065_pro_31	cp011279_pro_2233	cp010518_pro_2232	PAQ31011_00193, PAQ31011_02713	PBR20603_02462	maos01000029_pro_25	PCA20602_00222	PCA31118_02140	B6_00895, B6_03559	PCE31106_01089, PCE31106_04727	PCE31107_01434	PCO31010_02300	PCO31110_03414	PCO31111_01619	kb944452_pro_196	PEP31012_00307	cp011807_pro_3453	jtcr01000009_pro_155	jtcs01000022_pro_134	PFI31113_04844	PHO31112_01487	PIN31009_04058	PIN31115_04360	PMO31116_03188	cp013480_pro_4225	PNO31109_03487	cp011253_pro_3714	PPN31114_03322	cp006900_pro_727
OG0000277	NA	PAN31117_02271	PAN31108_04442	cp011501_pro_249	cp013481_pro_15	cp014018_pro_656	PAP18089_00258	rhsh01000011_pro_74	rhsg01000005_pro_251	rwhx01000008_pro_44	pyya01000003_pro_161	rzmt01000002_pro_125	rzmu01000004_pro_67	rwhw01000004_pro_22	nbta01000009_pro_433	rses01000005_pro_71	rzmv01000010_pro_67	rqxy01000004_pro_44	rser01000021_pro_67	rrcr01000009_pro_44	rwhv01000007_pro_43	cp011279_pro_3314	cp010518_pro_3298	PAQ31011_01174	PBR20603_00821	maos01000022_pro_41	PCA20602_01430	PCA31118_01129	B6_02105	PCE31106_03252	PCE31107_00066	PCO31010_01558	PCO31110_01014, PCO31110_03560	PCO31111_01411, PCO31111_01481, PCO31111_01482, PCO31111_01483	kb944452_pro_50, kb944459_pro_46	PEP31012_00118, PEP31012_04309	cp011807_pro_4429	jtcr01000027_pro_11	jtcs01000018_pro_11	PFI31113_03352	PHO31112_02593	PIN31009_00070	PIN31115_00261	PMO31116_01604	cp013480_pro_5222	PNO31109_02003	cp011253_pro_4714	PPN31114_02104	cp006900_pro_4027
OG0000278	NA	PAN31117_02352	PAN31108_04508	cp011501_pro_1493	cp013481_pro_3576	cp014018_pro_1889	PAP18089_04850	rhsh01000023_pro_44	rhsg01000019_pro_44	rwhx01000018_pro_22	pyya01000011_pro_88	rzmt01000023_pro_48	rzmu01000010_pro_87	rwhw01000022_pro_22	nbta01000014_pro_136	rses01000027_pro_22	rzmv01000033_pro_30	rqxy01000007_pro_87	rser01000036_pro_29	rrcr01000011_pro_87	rwhv01000023_pro_22	cp011279_pro_4548	cp010518_pro_4533	PAQ31011_04060	PBR20603_03108, PBR20603_04260	maos01000001_pro_73, maos01000036_pro_68	PCA20602_03494	PCA31118_03477	B6_03861	PCE31106_03745	PCE31107_02429, PCE31107_04230	PCO31010_03186	PCO31110_04670	PCO31111_02487	kb944429_pro_109	PEP31012_02809	cp011807_pro_1199	jtcr01000028_pro_10	jtcs01000023_pro_10	PFI31113_02570	PHO31112_02824	PIN31009_01441	PIN31115_01627	PMO31116_04256	cp013480_pro_3789	PNO31109_03025	cp011253_pro_1247	PPN31114_01690, PPN31114_04829	cp006900_pro_2938
OG0000279	NA	PAN31117_03427	PAN31108_00984	cp011501_pro_384	cp013481_pro_4667	cp014018_pro_783	PAP18089_00401	rhsh01000005_pro_34	rhsg01000007_pro_34	rwhx01000046_pro_10	pyya01000020_pro_26	rzmt01000002_pro_249	rzmu01000042_pro_25	rwhw01000051_pro_11	nbta01000001_pro_58	rses01000055_pro_11	rzmv01000019_pro_25	NA	rser01000018_pro_25	NA	rwhv01000051_pro_25	cp011279_pro_3450	cp010518_pro_3433	PAQ31011_01296	PBR20603_00680	maos01000002_pro_79	PCA20602_01550	PCA31118_00527, PCA31118_01272	B6_01640, B6_04291	PCE31106_00065, PCE31106_03356	PCE31107_00229, PCE31107_04017	PCO31010_01688	PCO31110_00851, PCO31110_04038	PCO31111_00657, PCO31111_02623	kb944434_pro_42, kb944454_pro_864	PEP31012_01560	cp011807_pro_95	jtcr01000046_pro_21	jtcs01000018_pro_147	PFI31113_02924	PHO31112_00471, PHO31112_02912	PIN31009_00215	PIN31115_00422	PMO31116_01500	cp013480_pro_127	NA	cp011253_pro_81, cp011518_pro_26	PPN31114_00723, PPN31114_02232	cp006900_pro_3938
OG0000280	NA	PAN31117_03652	PAN31108_01172	cp011501_pro_3575	cp013481_pro_1414	cp014018_pro_4007	PAP18089_02754	rhsh01000003_pro_254	rhsg01000006_pro_253	rwhx01000031_pro_8	pyya01000018_pro_9	rzmt01000007_pro_31	rzmu01000016_pro_8	rwhw01000020_pro_8	nbta01000013_pro_31	rses01000029_pro_8	rzmv01000007_pro_138	rqxy01000015_pro_8	rser01000063_pro_8	rrcr01000031_pro_8	rwhv01000012_pro_8	cp011279_pro_1939	cp010518_pro_1938	PAQ31011_03751	PBR20603_02712	maos01000037_pro_49	PCA20602_02296	PCA31118_05011	B6_02397	PCE31106_02498	PCE31107_01568, PCE31107_04112	PCO31010_04233	PCO31110_03696	PCO31111_03265	kb944431_pro_89	PEP31012_04083	cp011807_pro_3188	jtcr01000024_pro_57	jtcs01000037_pro_51	PFI31113_04294	PHO31112_04351	PIN31009_04413	PIN31115_03377	PMO31116_02230	cp013480_pro_1195	PNO31109_03785	cp011253_pro_3448	PPN31114_04463	cp006900_pro_1047
OG0000281	NA	PAN31117_03778	PAN31108_05117	cp011501_pro_2206	cp013481_pro_2232	cp014018_pro_2587	PAP18089_04388	rhsh01000004_pro_357	rhsg01000002_pro_468	rwhx01000071_pro_11	pyya01000001_pro_518	rzmt01000001_pro_276	rzmu01000001_pro_449	rwhw01000040_pro_11	nbta01000022_pro_11	rses01000030_pro_58	rzmv01000002_pro_278	rqxy01000064_pro_17	rser01000003_pro_186	rrcr01000061_pro_17	rwhv01000079_pro_9	cp011279_pro_569	cp010518_pro_569	PAQ31011_04369	PBR20603_04796	maos01000064_pro_11	PCA20602_05049	PCA31118_03769	B6_01739	PCE31106_02712	PCE31107_04532	PCO31010_05332	PCO31110_00036, PCO31110_02731	PCO31111_04433, PCO31111_04983	kb944423_pro_174, kb944454_pro_42	PEP31012_03522	cp011807_pro_1817	jtcr01000021_pro_56	jtcs01000017_pro_84	PFI31113_03862	PHO31112_01256, PHO31112_05279	PIN31009_03575	PIN31115_05062	PMO31116_03338	cp013480_pro_2912	PNO31109_02666, PNO31109_03920	cp011253_pro_1940	PPN31114_01242	cp006900_pro_2300
OG0000282	NA	PAN31117_04037	PAN31108_00360, PAN31108_04561	cp011501_pro_1088	cp013481_pro_3967	cp014018_pro_1483	PAP18089_05000	rhsh01000020_pro_83	rhsg01000018_pro_83	rwhx01000045_pro_21	pyya01000031_pro_49	rzmt01000032_pro_21	rzmu01000041_pro_21	rwhw01000050_pro_21	nbta01000005_pro_23	rses01000049_pro_21	rzmv01000050_pro_16	rqxy01000037_pro_41	rser01000030_pro_19	rrcr01000037_pro_41	rwhv01000060_pro_21	cp011279_pro_4156	cp010518_pro_4141	NA	PBR20603_04644	maos01000023_pro_87	PCA20602_03236	PCA31118_04867	B6_02215	PCE31106_00835	PCE31107_00929	PCO31010_03123, PCO31010_05225	PCO31110_00130	PCO31111_04281	kb944454_pro_124	PEP31012_00923	cp011807_pro_827, cp011808_pro_110	jtcr01000038_pro_55	jtcs01000032_pro_17	PFI31113_03403	PHO31112_04576	PIN31009_01085	PIN31115_01278, PIN31115_04512	PMO31116_00797	cp013480_pro_971	PNO31109_03867	cp011253_pro_879, cp011518_pro_144	PPN31114_03061	cp006900_pro_3202, cp006900_pro_3274
OG0000283	NA	PAN31117_04501	PAN31108_01323, PAN31108_02429	cp011501_pro_3435	cp013481_pro_1555	cp014018_pro_3863	PAP18089_02951	rhsh01000003_pro_113	rhsg01000006_pro_112	rwhx01000026_pro_58	pyya01000019_pro_86	rzmt01000017_pro_3	rzmu01000028_pro_3	rwhw01000023_pro_52	nbta01000013_pro_177	rses01000025_pro_3	rzmv01000016_pro_3	rqxy01000033_pro_3	rser01000037_pro_3	rrcr01000032_pro_3	rwhv01000030_pro_3	cp011279_pro_1799	cp010518_pro_1798	PAQ31011_03604	PBR20603_04144	NA	PCA20602_02145	PCA31118_05269	B6_01638, B6_02622	PCE31106_01475, PCE31106_03354	PCE31107_03369, PCE31107_04015	PCO31010_04391	PCO31110_03838, PCO31110_04036	PCO31111_02621, PCO31111_03885	kb944434_pro_40, kb944444_pro_7	PEP31012_03750	cp011807_pro_3046	jtcr01000001_pro_5	jtcs01000025_pro_67	PFI31113_04560	PHO31112_02910, PHO31112_04059	PIN31009_04254	PIN31115_03225	PMO31116_02102	cp013480_pro_1343	PNO31109_01782	cp011253_pro_3303	PPN31114_04303	cp006900_pro_1156
OG0000284	muhy01000001_pro_357	PAN31117_02932	PAN31108_02472	cp011501_pro_1306	cp013481_pro_3748	cp014018_pro_1710	PAP18089_03560	rhsh01000010_pro_123	rhsg01000008_pro_123	rwhx01000006_pro_122	pyya01000010_pro_123	rzmt01000009_pro_122	rzmu01000031_pro_60, rzmu01000065_pro_1	rwhw01000078_pro_19, rwhw01000081_pro_17	nbta01000010_pro_123	rses01000008_pro_1, rses01000078_pro_1	rzmv01000037_pro_60, rzmv01000063_pro_19	rqxy01000009_pro_122, rqxy01000075_pro_1	rser01000007_pro_118	rrcr01000007_pro_122	rwhv01000006_pro_121	cp011279_pro_4361	cp010518_pro_4346	PAQ31011_04213	PBR20603_02175	maos01000031_pro_88	PCA20602_03934	PCA31118_03155	B6_03771	PCE31106_02064	PCE31107_03193	PCO31010_03370	PCO31110_04932	PCO31111_03710	kb944425_pro_117	PEP31012_02636	cp011807_pro_1017	jtcr01000043_pro_1	jtcs01000057_pro_16	PFI31113_02386	PHO31112_00678	PIN31009_01262	PIN31115_01449	PMO31116_03002	cp013480_pro_3960	PNO31109_03267	cp011253_pro_1060	PPN31114_04645	cp006900_pro_3093
OG0000285	NA	PAN31117_00087	PAN31108_00811	cp011501_pro_532	cp013481_pro_4516	cp014018_pro_937	PAP18089_00555	rhsh01000005_pro_187	rhsg01000007_pro_188	rwhx01000004_pro_86	pyya01000002_pro_128	rzmt01000003_pro_183	rzmu01000003_pro_183	rwhw01000003_pro_106	nbta01000008_pro_126	rses01000010_pro_109	rzmv01000001_pro_127	rqxy01000010_pro_109	rser01000001_pro_183	rrcr01000001_pro_183	rwhv01000001_pro_93	cp011279_pro_3599	cp010518_pro_3582	PAQ31011_01459	PBR20603_00523	maos01000030_pro_52, maos01000050_pro_130, maos01000061_pro_139	PCA20602_01742	PCA31118_01466	B6_02301	PCE31106_00276	PCE31107_00392	PCO31010_01881	PCO31110_00695	PCO31111_00518	kb944454_pro_712	PEP31012_01410	cp011807_pro_278	jtcr01000018_pro_120	jtcs01000016_pro_120	PFI31113_02769	PHO31112_00314	PIN31009_00413, PIN31009_02975	PIN31115_00590, PIN31115_02572	PMO31116_01316	cp013480_pro_299	PNO31109_00519	cp011253_pro_271	PPN31114_02422	cp006900_pro_3773
OG0000286	NA	PAN31117_00095	PAN31108_00803, PAN31108_02242	cp011501_pro_541	cp013481_pro_4507	cp014018_pro_946	PAP18089_00564	rhsh01000005_pro_196	rhsg01000007_pro_197	rwhx01000004_pro_77	pyya01000002_pro_137	rzmt01000003_pro_174	rzmu01000003_pro_174	rwhw01000003_pro_97	nbta01000008_pro_135	rses01000010_pro_118	rzmv01000001_pro_136	rqxy01000010_pro_118	rser01000001_pro_174	rrcr01000001_pro_174	rwhv01000001_pro_85	cp011279_pro_3608	cp010518_pro_3591	PAQ31011_01467, PAQ31011_04685, PAQ31011_04686	PBR20603_00515	maos01000030_pro_60, maos01000072_pro_60	PCA20602_01750	PCA31118_01474, PCA31118_03613	B6_04353	PCE31106_00284	PCE31107_00400	PCO31010_01889	PCO31110_00686	PCO31111_00509	kb944454_pro_703	PEP31012_01402	cp011807_pro_286	jtcr01000018_pro_129	jtcs01000016_pro_129	PFI31113_02760	PHO31112_00305	PIN31009_00422	PIN31115_00599	PMO31116_01308	cp013480_pro_308	PNO31109_00511	cp011253_pro_279	PPN31114_02431	cp006900_pro_3765
OG0000287	NA	PAN31117_00258	PAN31108_00638	cp011501_pro_695	cp013481_pro_4348	cp014018_pro_1106	PAP18089_00726	rhsh01000002_pro_113	rhsg01000003_pro_113	rwhx01000016_pro_81	pyya01000002_pro_295	rzmt01000003_pro_17	rzmu01000003_pro_17	rwhw01000015_pro_17	nbta01000008_pro_295	rses01000003_pro_157	rzmv01000001_pro_293	rqxy01000002_pro_156	rser01000001_pro_17	rrcr01000001_pro_17	rwhv01000041_pro_34	cp011279_pro_3763	cp010518_pro_3746	PAQ31011_01650	PBR20603_00355	maos01000001_pro_454	PCA20602_01915	PCA31118_01638	B6_00074, B6_04164	PCE31106_00442, PCE31106_01952	PCE31107_00556, PCE31107_03065	PCO31010_02056	PCO31110_00532	PCO31111_00354	kb944454_pro_532	PEP31012_01261, PEP31012_02752	cp011807_pro_440	jtcr01000003_pro_48	jtcs01000004_pro_53	PFI31113_01703	PHO31112_00137	PIN31009_00602	PIN31115_00780	PMO31116_01146	cp013480_pro_486	PNO31109_00361	cp011253_pro_459	PPN31114_02605	cp006900_pro_3626
OG0000288	NA	PAN31117_01296	PAN31108_04056	cp011501_pro_4258	cp013481_pro_732	cp014018_pro_1	PAP18089_03266	rhsh01000008_pro_24	rhsg01000009_pro_25	rwhx01000019_pro_20	pyya01000026_pro_20	rzmt01000028_pro_4	rzmu01000022_pro_20	rwhw01000014_pro_20	nbta01000004_pro_223	rses01000045_pro_35	rzmv01000025_pro_51	rqxy01000047_pro_20	rser01000028_pro_53	rrcr01000048_pro_20	rwhv01000019_pro_19	cp011279_pro_2622	cp010518_pro_2621	PAQ31011_02347	PBR20603_03790	maos01000035_pro_29	PCA20602_00570	PCA31118_02567	B6_01028	PCE31106_04683	PCE31107_01131	PCO31010_05086	PCO31110_03097	PCO31111_03023	kb944457_pro_240	PEP31012_00648	cp011807_pro_3746	jtcr01000019_pro_64	jtcs01000047_pro_47	PFI31113_02164	PHO31112_01858	PIN31009_04665	PIN31115_04847	PMO31116_01838, PMO31116_02753	NA	PNO31109_01266	cp011253_pro_4029	PPN31114_03738	cp006900_pro_1390, cp006900_pro_450
OG0000289	NA	PAN31117_01389	PAN31108_02035, PAN31108_05171	cp011501_pro_4093	cp013481_pro_904	cp014018_pro_4521	PAP18089_01758	rhsh01000006_pro_163	rhsg01000004_pro_351	rwhx01000020_pro_54	pyya01000041_pro_13	rzmt01000004_pro_113	rzmu01000008_pro_113	rwhw01000025_pro_22	nbta01000004_pro_400	rses01000006_pro_22	rzmv01000009_pro_22	rqxy01000003_pro_113	rser01000009_pro_102	rrcr01000008_pro_22	rwhv01000053_pro_13	cp011279_pro_2457	cp010518_pro_2456	PAQ31011_02461	PBR20603_03342	maos01000032_pro_2	PCA20602_00471	PCA31118_01672, PCA31118_02384	B6_01431	PCE31106_02803	PCE31107_01201	PCO31010_02555	PCO31110_03187	PCO31111_04384	kb944457_pro_157	PEP31012_00530	cp011807_pro_3670	jtcr01000041_pro_27	jtcs01000035_pro_8	PFI31113_02058	PHO31112_01941	PIN31009_05352	PIN31115_04947	PMO31116_01737	cp013480_pro_4470	PNO31109_01101	cp011253_pro_3947	PPN31114_03633	cp006900_pro_527
OG0000290	NA	PAN31117_01495	PAN31108_01939	cp011501_pro_4003	cp013481_pro_995	cp014018_pro_4429	PAP18089_01856	rhsh01000006_pro_71	rhsg01000004_pro_258	rwhx01000007_pro_71	pyya01000008_pro_71	rzmt01000004_pro_203	rzmu01000020_pro_70	rwhw01000011_pro_66	nbta01000023_pro_762	rses01000019_pro_66	rzmv01000020_pro_71	rqxy01000025_pro_21	rser01000005_pro_69	rrcr01000023_pro_21	rwhv01000016_pro_65	cp011279_pro_2367	cp010518_pro_2366	PAQ31011_02570	PBR20603_02612	maos01000069_pro_11	PCA20602_00367	PCA31118_02282	B6_00658, B6_03039	PCE31106_00948	PCE31107_01303, PCE31107_03617	PCO31010_02448	PCO31110_03278	PCO31111_01756	kb944457_pro_71	PEP31012_00429, PEP31012_03285	cp011807_pro_3583	jtcr01000009_pro_15	jtcs01000044_pro_52	PFI31113_01959	PHO31112_01351	PIN31009_03904	PIN31115_04206	PMO31116_04565	cp013480_pro_4368	PNO31109_00995	cp011253_pro_3850	PPN31114_03474	cp006900_pro_610
OG0000291	NA	PAN31117_01920	PAN31108_02663	cp011501_pro_2471	cp013481_pro_2454	cp014018_pro_2860	PAP18089_04046	rhsh01000001_pro_348	rhsg01000001_pro_388	rwhx01000068_pro_15	pyya01000015_pro_23	rzmt01000010_pro_96	rzmu01000035_pro_15	rwhw01000041_pro_21	nbta01000006_pro_87	rses01000040_pro_21	rzmv01000026_pro_15	rqxy01000053_pro_17	rser01000019_pro_25	rrcr01000022_pro_45	rwhv01000005_pro_21	cp011279_pro_835	cp010518_pro_835	PAQ31011_00106	PBR20603_00965	maos01000046_pro_45, maos01000062_pro_11	PCA20602_00494, PCA20602_00825	PCA31118_00979	B6_02737	PCE31106_03103	PCE31107_02181	PCO31010_00102	PCO31110_04463	PCO31111_02158	kb944424_pro_106	PEP31012_04150, PEP31012_04634	cp011807_pro_2077, cp011808_pro_84	jtcr01000058_pro_2	jtcs01000036_pro_10	PFI31113_00663	PHO31112_03803	PIN31009_03878, PIN31009_04746	PIN31115_04016, PIN31115_04920	PMO31116_00099	cp013480_pro_2559, cp013480_pro_4496	PNO31109_00927	cp011253_pro_2226	PPN31114_00956	cp006900_pro_2058
OG0000292	NA	PAN31117_02252	PAN31108_04423	cp011501_pro_223, cp011501_pro_230	cp013481_pro_34	cp014018_pro_637	PAP18089_00238	rhsh01000011_pro_93	rhsg01000005_pro_232	rwhx01000008_pro_25	pyya01000003_pro_88	rzmt01000002_pro_106, rzmt01000002_pro_87	rzmu01000004_pro_86	rwhw01000004_pro_3	nbta01000009_pro_414	rses01000005_pro_52	rzmv01000010_pro_86	rqxy01000004_pro_25	rser01000078_pro_2	rrcr01000009_pro_25	rwhv01000007_pro_25	cp011279_pro_3241, cp011279_pro_3259, cp011279_pro_3277, cp011279_pro_3295	cp010518_pro_3243, cp010518_pro_3261, cp010518_pro_3279	PAQ31011_01155	PBR20603_00845	maos01000022_pro_60	PCA20602_01411	PCA31118_01109	B6_02086	PCE31106_03271	PCE31107_00047	PCO31010_01539	PCO31110_01033	PCO31111_01387	kb944459_pro_26	PEP31012_04602	cp011807_pro_4409	jtcr01000008_pro_2	jtcs01000027_pro_9	PFI31113_03333	PHO31112_02573	PIN31009_00051	PIN31115_00237	PMO31116_01623	cp013480_pro_5202	PNO31109_02026	cp011253_pro_4695	PPN31114_02080	cp006900_pro_4045
OG0000293	NA	PAN31117_02587	PAN31108_01622	cp011501_pro_1939	cp013481_pro_2008, cp013481_pro_3519	cp014018_pro_2390	PAP18089_01457	rhsh01000004_pro_158, rhsh01000012_pro_89	rhsg01000002_pro_269, rhsg01000014_pro_89	rwhx01000001_pro_189	pyya01000001_pro_320	rzmt01000001_pro_79	rzmu01000001_pro_252	rwhw01000002_pro_84	nbta01000022_pro_365	rses01000001_pro_168	rzmv01000002_pro_83	rqxy01000001_pro_25	rser01000004_pro_10	rrcr01000003_pro_140	rwhv01000002_pro_25	cp011279_pro_302	cp010518_pro_302	PAQ31011_03281	PBR20603_01822	maos01000105_pro_25	PCA20602_02524	PCA31118_02875	B6_01161	PCE31106_01776	PCE31107_02332	PCO31010_02909	PCO31110_02514	PCO31111_01916	kb944423_pro_397	PEP31012_02450	cp011807_pro_1626	jtcr01000002_pro_1, jtcr01000012_pro_78	jtcs01000007_pro_23, jtcs01000013_pro_1	PFI31113_01160	PHO31112_01041	PIN31009_02078	PIN31115_02270	PMO31116_02592	cp013480_pro_3198	PNO31109_01594	cp011253_pro_1732	PPN31114_01457	cp006900_pro_2524
OG0000294	NA	PAN31117_02733	PAN31108_01481	cp011501_pro_2075	cp013481_pro_2173	cp014018_pro_2528	PAP18089_01599	rhsh01000004_pro_297	rhsg01000002_pro_408	rwhx01000001_pro_51	pyya01000001_pro_459	rzmt01000001_pro_217	rzmu01000001_pro_390	rwhw01000054_pro_20	nbta01000022_pro_227	rses01000026_pro_2	rzmv01000002_pro_220	rqxy01000001_pro_163	rser01000003_pro_127	rrcr01000003_pro_2	rwhv01000035_pro_51	cp011279_pro_437	cp010518_pro_437	PAQ31011_03430	PBR20603_01963	maos01000070_pro_5	PCA20602_02669	PCA31118_03018	B6_00366, B6_00460	PCE31106_04054	PCE31107_04408	PCO31010_03059	PCO31110_02654	PCO31111_04826	kb944423_pro_259	PEP31012_04271	cp011807_pro_1765	jtcr01000040_pro_56	jtcs01000017_pro_147	PFI31113_01303	PHO31112_01183	PIN31009_02226	PIN31115_02417	PMO31116_04402	cp013480_pro_3052	PNO31109_03687	cp011253_pro_1873	PPN31114_01307	cp006900_pro_2401
OG0000295	NA	PAN31117_03201, PAN31117_03410	PAN31108_01006, PAN31108_03598	cp011501_pro_369	cp013481_pro_4683	cp014018_pro_767	PAP18089_00385	rhsh01000005_pro_18	rhsg01000007_pro_18	rwhx01000035_pro_6	pyya01000020_pro_42	rzmt01000002_pro_234	rzmu01000030_pro_42	rwhw01000004_pro_131	nbta01000001_pro_42	rses01000036_pro_6	rzmv01000019_pro_41	NA	rser01000018_pro_41	NA	rwhv01000036_pro_42	cp011279_pro_3435	cp010518_pro_3418	PAQ31011_01280, PAQ31011_03003	PBR20603_00696	maos01000002_pro_61, maos01000028_pro_233	PCA20602_01530	PCA31118_01255, PCA31118_01657	B6_01911	PCE31106_00039	PCE31107_00201	PCO31010_01668, PCO31010_02643	PCO31110_00877	PCO31111_00683	kb944439_pro_82, kb944454_pro_890	PEP31012_01576	cp011807_pro_77	jtcr01000047_pro_27	jtcs01000040_pro_27	PFI31113_00800, PFI31113_02941	PHO31112_00497	PIN31009_00198	PIN31115_00405	PMO31116_01517	cp013480_pro_111	PNO31109_01930	cp011253_pro_64	PPN31114_02215	cp006900_pro_3951
OG0000296	NA	PAN31117_03300, PAN31117_03680	PAN31108_01144	cp011501_pro_3601	cp013481_pro_1387	cp014018_pro_4035	PAP18089_02726	rhsh01000003_pro_281	rhsg01000006_pro_280	rwhx01000064_pro_20	pyya01000051_pro_20	rzmt01000007_pro_4	rzmu01000054_pro_20	rwhw01000067_pro_20	nbta01000013_pro_4	rses01000090_pro_4	rzmv01000024_pro_20	rqxy01000066_pro_4	rser01000059_pro_19	rrcr01000077_pro_7	rwhv01000092_pro_4	cp011279_pro_1965	cp010518_pro_1964	PAQ31011_03779	PBR20603_02684	maos01000039_pro_61	PCA20602_02324	PCA31118_05039	B6_04367	PCE31106_02526	PCE31107_04140	PCO31010_03924, PCO31010_04205	PCO31110_03669	PCO31111_03238	kb944431_pro_62	PEP31012_04056	cp011807_pro_3216	jtcr01000004_pro_66, jtcr01000024_pro_84	jtcs01000034_pro_29, jtcs01000037_pro_78	PFI31113_00547, PFI31113_04267	PHO31112_04381	PIN31009_04441	PIN31115_03405	PMO31116_02262	NA	PNO31109_03812	cp011253_pro_3476	PPN31114_04491	cp006900_pro_1019
OG0000297	NA	PAN31117_03612	PAN31108_01218	cp011501_pro_3536	cp013481_pro_1453	cp014018_pro_3968	PAP18089_02794	rhsh01000003_pro_215	rhsg01000006_pro_214	rwhx01000031_pro_47	pyya01000018_pro_48	rzmt01000007_pro_69	rzmu01000016_pro_47	rwhw01000020_pro_47	nbta01000013_pro_70	rses01000029_pro_47	rzmv01000007_pro_99	rqxy01000015_pro_47	rser01000024_pro_21	rrcr01000031_pro_47	rwhv01000012_pro_46	cp011279_pro_1900	cp010518_pro_1899	PAQ31011_03708	PBR20603_01374, PBR20603_02753	maos01000036_pro_19, maos01000045_pro_17	PCA20602_02251	PCA31118_04422	B6_03710	PCE31106_02459	PCE31107_00648, PCE31107_03298	PCO31010_04275	PCO31110_03736	PCO31111_03304	kb944431_pro_127	PEP31012_04385	cp011807_pro_3151	jtcr01000024_pro_20	jtcs01000037_pro_14	PFI31113_04567	PHO31112_04004, PHO31112_04552	PIN31009_04370	PIN31115_03336	PMO31116_02190	cp013480_pro_1234	PNO31109_01877	NA	PPN31114_04423	cp006900_pro_1081
OG0000298	NA	PAN31117_03883, PAN31117_05187	PAN31108_02857	cp011501_pro_2295	cp013481_pro_2320	cp014018_pro_2677	PAP18089_04484	rhsh01000014_pro_88	rhsg01000010_pro_87	rwhx01000011_pro_26	pyya01000006_pro_26	rzmt01000001_pro_366	rzmu01000012_pro_26	rwhw01000010_pro_53	nbta01000006_pro_271	rses01000011_pro_26	rzmv01000004_pro_80	rqxy01000055_pro_26	rser01000006_pro_131	rrcr01000024_pro_37	rwhv01000024_pro_26	cp011279_pro_658	cp010518_pro_658	PAQ31011_04479, PAQ31011_04821	PBR20603_03543	maos01000061_pro_39, maos01000094_pro_85	PCA20602_04505, PCA20602_04614	PCA31118_03872	B6_00291	PCE31106_02606	PCE31107_03765	PCO31010_01237, PCO31010_04763	NA	NA	NA	PEP31012_03444	cp011807_pro_1911	jtcr01000037_pro_2	jtcs01000026_pro_2	PFI31113_03719	NA	PIN31009_03684	PIN31115_05174	PMO31116_03429	cp013480_pro_2807	PNO31109_02574	cp011253_pro_2045	PPN31114_01139	cp006900_pro_2216
OG0000299	NA	NA	NA	cp011501_pro_4191, cp011501_pro_4209	cp013481_pro_785, cp013481_pro_806	NA	PAP18089_02895, PAP18089_03186, PAP18089_03188, PAP18089_03207	rhsh01000018_pro_2	rhsg01000017_pro_2	rwhx01000037_pro_19, rwhx01000037_pro_2, rwhx01000060_pro_18	pyya01000003_pro_117, pyya01000006_pro_90, pyya01000022_pro_19, pyya01000022_pro_2	rzmt01000004_pro_19, rzmt01000004_pro_2, rzmt01000056_pro_18	rzmu01000008_pro_19, rzmu01000008_pro_2	rwhw01000002_pro_217, rwhw01000044_pro_30	nbta01000004_pro_279, nbta01000004_pro_295, nbta01000004_pro_297, nbta01000010_pro_139	rses01000006_pro_116, rses01000006_pro_133, rses01000103_pro_3	rzmv01000009_pro_116, rzmv01000009_pro_133	rqxy01000003_pro_19, rqxy01000003_pro_2, rqxy01000019_pro_50	rser01000004_pro_165, rser01000006_pro_67, rser01000009_pro_8, rser01000074_pro_10	rrcr01000008_pro_116, rrcr01000008_pro_133, rrcr01000016_pro_45	rwhv01000048_pro_30, rwhv01000048_pro_47	cp011279_pro_2555, cp011279_pro_2573	cp010518_pro_2554, cp010518_pro_2572	NA	NA	NA	NA	PCA31118_02513, PCA31118_02514, PCA31118_05188	B6_02975	PCE31106_03921, PCE31106_04197, PCE31106_04198, PCE31106_04242	PCE31107_01333	NA	PCO31110_03021	PCO31111_02005	kb944457_pro_314, kb944457_pro_315	NA	NA	NA	NA	NA	PHO31112_04650, PHO31112_05241	NA	PIN31115_04167	NA	NA	PNO31109_01130	NA	NA	NA
OG0000300	muhy01000001_pro_14	PAN31117_03663	PAN31108_01161	cp011501_pro_3584	cp013481_pro_1404	cp014018_pro_4017	PAP18089_02743	rhsh01000003_pro_264	rhsg01000006_pro_263	rwhx01000064_pro_3	pyya01000051_pro_3	rzmt01000007_pro_21	rzmu01000054_pro_3	rwhw01000067_pro_3	nbta01000013_pro_21	rses01000084_pro_3	rzmv01000024_pro_3	rqxy01000066_pro_21	rser01000059_pro_3	rrcr01000073_pro_3	rwhv01000086_pro_3	cp011279_pro_1948	cp010518_pro_1947	PAQ31011_03762	PBR20603_02701	maos01000037_pro_38	PCA20602_02307	PCA31118_01659, PCA31118_05022	B6_02386	PCE31106_02509	PCE31107_04123	PCO31010_04222	PCO31110_03686	PCO31111_03255	kb944431_pro_79	PEP31012_04073	cp011807_pro_3199	jtcr01000024_pro_67	jtcs01000037_pro_61	PFI31113_04284	PHO31112_04362	PIN31009_04424	PIN31115_03388	PMO31116_02241	cp013480_pro_1185	PNO31109_03795	cp011253_pro_3459	PPN31114_04474	cp006900_pro_1038
OG0000301	muhy01000001_pro_15	PAN31117_03657	PAN31108_01167	NA	cp013481_pro_1409	cp014018_pro_4012	PAP18089_02749	rhsh01000003_pro_259	rhsg01000006_pro_258	rwhx01000031_pro_3	pyya01000018_pro_4	rzmt01000007_pro_26	rzmu01000016_pro_3	rwhw01000020_pro_3	nbta01000013_pro_26	rses01000029_pro_3	rzmv01000007_pro_143	rqxy01000015_pro_3	rser01000063_pro_3	rrcr01000031_pro_3	rwhv01000012_pro_3	NA	NA	PAQ31011_03756	PBR20603_02707	maos01000037_pro_44	PCA20602_02301	PCA31118_05016	B6_02392	PCE31106_02503	PCE31107_04117	PCO31010_04228	PCO31110_03691	PCO31111_03260	kb944431_pro_84	PEP31012_04078	cp011807_pro_3193, cp011808_pro_196, cp011809_pro_14	NA	NA	PFI31113_04289	PHO31112_04356	PIN31009_04418	PIN31115_03382	PMO31116_02235	cp013480_pro_1190	PNO31109_03790	cp011253_pro_3453, cp011518_pro_320, cp011520_pro_52, cp011520_pro_62	PPN31114_04468	NA
OG0000302	muhy01000001_pro_161	PAN31117_01093	PAN31108_00565	cp011501_pro_3086	cp013481_pro_3015	cp014018_pro_3408	PAP18089_02585	rhsh01000021_pro_80	rhsg01000013_pro_80	rwhx01000073_pro_11	pyya01000057_pro_6	rzmt01000021_pro_6	rzmu01000063_pro_7	rwhw01000077_pro_11	nbta01000002_pro_83	rses01000076_pro_11	rzmv01000061_pro_11	rqxy01000074_pro_11	rser01000065_pro_11	rrcr01000068_pro_6	rwhv01000080_pro_11	cp011279_pro_1450	cp010518_pro_1449	PAQ31011_00960	PBR20603_01318	maos01000041_pro_59	PCA20602_04798	PCA31118_00327	B6_01472	PCE31106_04700	PCE31107_01680	PCO31010_00942	PCO31110_01730	PCO31111_00955	kb944451_pro_121	PEP31012_02002	cp011807_pro_2611	jtcr01000035_pro_145	jtcs01000014_pro_173	PFI31113_00075	PHO31112_03364	PIN31009_03542	PIN31115_02777	PMO31116_04509	cp013480_pro_1732	PNO31109_02399	cp011253_pro_2851	PPN31114_03913	cp006900_pro_1524
OG0000303	muhy01000001_pro_510	PAN31117_05222	PAN31108_04836	cp011501_pro_3261	cp013481_pro_3195	cp014018_pro_3586	PAP18089_04318	rhsh01000015_pro_50	rhsg01000015_pro_50	rwhx01000012_pro_36	pyya01000016_pro_37	rzmt01000013_pro_36	rzmu01000038_pro_10	rwhw01000045_pro_30	nbta01000017_pro_51	rses01000017_pro_30	rzmv01000043_pro_30	rqxy01000045_pro_30	rser01000015_pro_32	rrcr01000033_pro_36	rwhv01000046_pro_9	cp011279_pro_1625	cp010518_pro_1624	PAQ31011_04877	PBR20603_04314	maos01000061_pro_99	PCA20602_04680	PCA31118_00111	B6_04461	PCE31106_01295	PCE31107_04305	PCO31010_01180	PCO31110_02060	PCO31111_04556	kb944426_pro_204	PEP31012_03644	cp011807_pro_2820	jtcr01000013_pro_11	jtcs01000025_pro_262	PFI31113_03530	PHO31112_04267	PIN31009_03332	PIN31115_03027	PMO31116_02703	cp013480_pro_1534	PNO31109_03585	cp011253_pro_3121	PPN31114_04118	cp006900_pro_1347
OG0000304	muhy01000001_pro_669	PAN31117_02133	PAN31108_02229	cp011501_pro_113	cp013481_pro_149	cp014018_pro_520	PAP18089_00121	rhsh01000007_pro_116	rhsg01000005_pro_116	rwhx01000022_pro_30	pyya01000025_pro_48	rzmt01000022_pro_30	rzmu01000006_pro_115	rwhw01000016_pro_27	nbta01000009_pro_298	rses01000022_pro_30	rzmv01000006_pro_116	rqxy01000024_pro_41	rser01000027_pro_47	rrcr01000005_pro_115	rwhv01000037_pro_13	cp011279_pro_3131	cp010518_pro_3133	PAQ31011_04675	PBR20603_02948	maos01000072_pro_68	PCA20602_04144	PCA31118_03623	B6_01825	PCE31106_03915	PCE31107_03914	PCO31010_01413	PCO31110_01149	PCO31111_01269	kb944456_pro_93	PEP31012_03062	cp011807_pro_4283	jtcr01000005_pro_124	jtcs01000019_pro_124	PFI31113_03196	PHO31112_02454	PIN31009_04843	PIN31115_00115	PMO31116_03616	cp013480_pro_5081	PNO31109_02080	cp011253_pro_4562	PPN31114_01962	cp006900_pro_4149
OG0000305	muhy01000004_pro_82	PAN31117_04994	PAN31108_04672	cp011501_pro_4458	cp013481_pro_534	cp014018_pro_202	PAP18089_03897	rhsh01000009_pro_52	rhsg01000012_pro_52	rwhx01000003_pro_170	pyya01000021_pro_52	rzmt01000016_pro_44	rzmu01000029_pro_11	rwhw01000027_pro_11	nbta01000004_pro_23	rses01000033_pro_44	rzmv01000015_pro_42	rqxy01000022_pro_44	rser01000012_pro_69	rrcr01000036_pro_24	rwhv01000032_pro_43	cp011279_pro_2821	cp010518_pro_2822	PAQ31011_05248	PBR20603_04073	maos01000048_pro_1	PCA20602_03591	PCA31118_04519	B6_02778, B6_03068	PCE31106_02337	PCE31107_03645	PCO31010_04482	PCO31110_04052	PCO31111_02637	kb944434_pro_56	PEP31012_03314	cp011807_pro_3954	jtcr01000034_pro_22	jtcs01000001_pro_131	PFI31113_04150	PHO31112_02926	PIN31009_05176	PIN31115_05296	PMO31116_03964	cp013480_pro_4760	PNO31109_02861	cp011253_pro_4237	PPN31114_05049	cp006900_pro_205
OG0000306	NA	PAN31117_00040	NA	cp011501_pro_485	cp013481_pro_4563	cp014018_pro_890	PAP18089_00507	rhsh01000005_pro_140	rhsg01000007_pro_141	rwhx01000004_pro_133	pyya01000002_pro_81	rzmt01000003_pro_230	rzmu01000003_pro_230	rwhw01000003_pro_153	nbta01000008_pro_79	rses01000010_pro_62	rzmv01000001_pro_80	rqxy01000010_pro_62	rser01000001_pro_228	rrcr01000001_pro_230	rwhv01000001_pro_140	cp011279_pro_3552	cp010518_pro_3535	PAQ31011_01409	PBR20603_00570	maos01000040_pro_67	PCA20602_01692	PCA31118_01417, PCA31118_03403	B6_02253, B6_03019, B6_04504	PCE31106_00222	PCE31107_00338	PCO31010_01831	PCO31110_00744	PCO31111_02734	kb944454_pro_758	PEP31012_01456	cp011807_pro_232	jtcr01000018_pro_75	jtcs01000016_pro_75	PFI31113_02816	PHO31112_00363	PIN31009_00358	PIN31115_00535	PMO31116_01364	cp013480_pro_243	PNO31109_00564	cp011253_pro_218	PPN31114_02375	cp006900_pro_3818
OG0000307	NA	PAN31117_00081	PAN31108_00816, PAN31108_05173	cp011501_pro_527	cp013481_pro_4521	cp014018_pro_932	PAP18089_00550	rhsh01000005_pro_182	rhsg01000007_pro_183	rwhx01000004_pro_91	pyya01000002_pro_123	rzmt01000003_pro_188	rzmu01000003_pro_188	rwhw01000003_pro_111	nbta01000008_pro_121	rses01000010_pro_104	rzmv01000001_pro_122	rqxy01000010_pro_104	rser01000001_pro_188	rrcr01000001_pro_188	rwhv01000001_pro_98	cp011279_pro_3594	cp010518_pro_3577	PAQ31011_00222, PAQ31011_01453	PBR20603_00529	maos01000030_pro_47, maos01000073_pro_9	PCA20602_01737	PCA31118_01462	B6_02296	PCE31106_00263	PCE31107_00379	PCO31010_00252, PCO31010_01876	PCO31110_00700	PCO31111_00523	kb944454_pro_717	PEP31012_01415	cp011807_pro_273	NA	NA	PFI31113_02773	PHO31112_00319	PIN31009_00400, PIN31009_04736	PIN31115_00577, PIN31115_04910	PMO31116_01321	cp013480_pro_286	PNO31109_00524	cp011253_pro_2302, cp011253_pro_260	PPN31114_02417	cp006900_pro_3778
OG0000308	NA	PAN31117_00917	PAN31108_00394	cp011501_pro_2934	cp013481_pro_2860	cp014018_pro_3252	PAP18089_02420	rhsh01000026_pro_4	rhsg01000022_pro_4	rwhx01000025_pro_51	pyya01000045_pro_17	rzmt01000044_pro_15	rzmu01000021_pro_15	rwhw01000032_pro_45, rwhw01000128_pro_3	nbta01000023_pro_396	rses01000044_pro_1, rses01000082_pro_15	rzmv01000041_pro_1, rzmv01000065_pro_15	rqxy01000048_pro_35, rqxy01000077_pro_1	rser01000020_pro_63	rrcr01000020_pro_54	rwhv01000022_pro_1, rwhv01000083_pro_15	cp011279_pro_1298	cp010518_pro_1297	PAQ31011_00692	PBR20603_01148	maos01000023_pro_36	PCA20602_01309	PCA31118_00499	B6_02441	PCE31106_03961	PCE31107_01839	PCO31010_00697	PCO31110_01501	PCO31111_00792	kb944428_pro_89	PEP31012_01845	cp011807_pro_2456	jtcr01000051_pro_39	jtcs01000028_pro_7	PFI31113_00244	PHO31112_03517	PIN31009_03016	PIN31115_02599	PMO31116_00544	cp013480_pro_1905	PNO31109_00650	cp011253_pro_2696	PPN31114_00154	cp006900_pro_1724
OG0000309	NA	PAN31117_01526, PAN31117_03947	PAN31108_02918, PAN31108_03405	cp011501_pro_3972	cp013481_pro_1026	cp014018_pro_4398	PAP18089_01935	rhsh01000006_pro_40	rhsg01000004_pro_227	rwhx01000007_pro_102	pyya01000008_pro_40	rzmt01000004_pro_234	rzmu01000009_pro_11	rwhw01000091_pro_11	nbta01000023_pro_731	rses01000018_pro_77	rzmv01000021_pro_11	rqxy01000020_pro_11	rser01000005_pro_99	rrcr01000050_pro_11	rwhv01000015_pro_11	cp011279_pro_2336	cp010518_pro_2335	PAQ31011_02600, PAQ31011_04542	NA	maos01000028_pro_268, maos01000038_pro_18, maos01000094_pro_147	PCA20602_00336, PCA20602_04567	PCA31118_03949	B6_00685, B6_04022	PCE31106_00616, PCE31106_00712	PCE31107_00723, PCE31107_00823, PCE31107_02743	PCO31010_02412, PCO31010_04821	PCO31110_03308	PCO31111_01727	kb944457_pro_42	PEP31012_01101, PEP31012_01777	NA	jtcr01000009_pro_47	jtcs01000044_pro_20	PFI31113_01926	PHO31112_01378	NA	NA	NA	NA	PNO31109_01149	NA	PPN31114_02951, PPN31114_03134, PPN31114_03441	NA
OG0000310	NA	PAN31117_01906	PAN31108_01449, PAN31108_02062, PAN31108_02064, PAN31108_03996, PAN31108_03999	cp011501_pro_270, cp011501_pro_4124	cp013481_pro_872	cp014018_pro_4552, cp014018_pro_4563, cp014018_pro_4565	PAP18089_01726, PAP18089_03070, PAP18089_03073	rhsh01000006_pro_194	rhsg01000004_pro_382	rwhx01000020_pro_23, rwhx01000065_pro_2	pyya01000052_pro_1	rzmt01000004_pro_82, rzmt01000051_pro_1	rzmu01000008_pro_82, rzmu01000056_pro_1	rwhw01000124_pro_1	nbta01000004_pro_368	rses01000006_pro_53, rses01000068_pro_1	rzmv01000009_pro_53, rzmv01000049_pro_8	rqxy01000003_pro_82, rqxy01000068_pro_1	rser01000009_pro_71, rser01000060_pro_2	rrcr01000008_pro_53, rrcr01000062_pro_1	rwhv01000070_pro_19, rwhv01000084_pro_12	cp011279_pro_2488, cp011279_pro_3336	cp010518_pro_2487, cp010518_pro_3319	PAQ31011_02405, PAQ31011_02408	NA	NA	NA	PCA31118_01153, PCA31118_02422, PCA31118_02426, PCA31118_02436, PCA31118_02437	NA	PCE31106_00136	PCE31107_00090	PCO31010_00115	NA	PCO31111_04586, PCO31111_05082	kb944459_pro_74	NA	NA	NA	NA	NA	PHO31112_01914	NA	NA	PMO31116_00529	cp013480_pro_2548, cp013480_pro_8	NA	cp011253_pro_2241	NA	cp006900_pro_868
OG0000311	NA	PAN31117_02230	PAN31108_04401	cp011501_pro_200	cp013481_pro_58	cp014018_pro_612	PAP18089_00214	rhsh01000011_pro_118	rhsg01000005_pro_207	rwhx01000008_pro_1	pyya01000003_pro_63	rzmt01000002_pro_63	rzmu01000004_pro_110	rwhw01000080_pro_14	nbta01000009_pro_390	rses01000005_pro_28	rzmv01000010_pro_110	rqxy01000004_pro_1	rser01000022_pro_24	rrcr01000009_pro_1	rwhv01000007_pro_1	cp011279_pro_3218	cp010518_pro_3220	PAQ31011_01133	NA	maos01000022_pro_82	PCA20602_01386, PCA20602_03432	PCA31118_05070	B6_02062	PCE31106_03294	PCE31107_00023	PCO31010_01514	PCO31110_01054	PCO31111_01366	kb944459_pro_2	PEP31012_04629	cp011807_pro_4381	jtcr01000005_pro_22	jtcs01000019_pro_22	PFI31113_03309	PHO31112_02552	PIN31009_00027	PIN31115_00212	PMO31116_01645	cp013480_pro_5179	PNO31109_02049	cp011253_pro_4662	PPN31114_02058	cp006900_pro_4067, cp006900_pro_996
[truncated: 10,471 more rows]
[truncated: 31 more columns]

## Sheet: Caption
Data table used for data analysis in R. Orthogroups with their mapping onto the genomes and species in which they were present, the specificity (core, multiple species, single species or single isolate), and COG and KEGG functional classification.
